# Supplementary material for: The copper-catalyzed radical aminophosphinoylation of maleimides with anilines and diarylphosphine oxides
Source: Royal Society of Chemistry journal article supplement (doi:10.1039/d2qo00184e), 2022-01-01

# Supporting Information

## Radical Aminophosphinylation of Maleimides with Anilines and Diarylphosphine Oxides

Yaling Xu,<sup>a</sup> Xueying Zhou,<sup>a</sup> Luya Chen,<sup>a</sup> Yunfei Ma,<sup>a</sup> Ge Wu,<sup>\*a,b</sup>

<sup>a</sup>School of Pharmaceutical Sciences, Wenzhou Medical University, Wenzhou 325035, People's Republic of China

<sup>b</sup>State Key Laboratory of Structural Chemistry, Fujian Institute of Research on the Structure of Matter, Chinese Academy of Sciences, Fuzhou, Fujian 350002, China

\*E-mail: wuge@wmu.edu.cn

### Table of Contents

|                                                                                      |          |
|--------------------------------------------------------------------------------------|----------|
| (1) General considerations, experimental data.....                                   | S2-S29   |
| (2) References for known compounds.....                                              | S30      |
| (3) <sup>1</sup> H, <sup>13</sup> C and <sup>19</sup> F NMR spectra of products..... | S31-S93  |
| (4) HRMS spectra of products.....                                                    | S94-S107 |

## General Information

Maleimides<sup>1</sup> were prepared according to the reported procedures. <sup>1</sup>H and <sup>13</sup>C spectra of known compounds were in accordance with those described in the literatures. All other reagents were purchased from TCI, Sigma-Aldrich, Alfa Aesar, Acros, and Meryer and used without further purification. <sup>1</sup>H NMR (500 MHz), <sup>13</sup>C NMR (125 MHz) and <sup>19</sup>F NMR (470 MHz) spectra were recorded in CDCl<sub>3</sub> and DMSO-D<sub>6</sub> solutions using a Bruker AVANCE 500 spectrometer. High-resolution mass spectra were recorded on an ESI-Q-TOF mass spectrometer. Analysis of crude reaction mixture was done on the Varian 4000 GC/MS and 1200 LC. All reactions were conducted using standard Schlenk techniques. Column chromatography was performed using EM silica gel 60 (300–400 m).

**Table 1. Reaction Optimization<sup>a</sup>**

|                 | <b>1a</b>               | <b>2a</b> | <b>3a</b>              |                                              | <b>4a</b>                           |                        |
|-----------------|-------------------------|-----------|------------------------|----------------------------------------------|-------------------------------------|------------------------|
| entry           | catalyst                |           | solvent                | oxidant                                      | base                                | yield (%) <sup>b</sup> |
| 1               | CuCl                    |           | MeCN                   | DTBP                                         |                                     | 11                     |
| 2               | CuI                     |           | MeCN                   | DTBP                                         |                                     | 7                      |
| 3               | CuCl <sub>2</sub>       |           | MeCN                   | DTBP                                         |                                     | 9                      |
| 4               | Cu(OAc) <sub>2</sub>    |           | MeCN                   | DTBP                                         |                                     | 0                      |
| 5               | CuCl                    |           | MeCN                   | 70% TBHP                                     |                                     | 0                      |
| 6               | CuCl                    |           | MeCN                   | K <sub>2</sub> S <sub>2</sub> O <sub>8</sub> |                                     | 10                     |
| 7               | CuCl                    |           | MeCN                   | Mn(OAc) <sub>3</sub>                         |                                     | 5                      |
| 8               | CuCl                    |           | MeCN                   | TBPB                                         |                                     | 0                      |
| 9               | CuCl                    |           | MeCN                   | DTBP                                         | Li <sub>2</sub> CO <sub>3</sub>     | 49                     |
| 10              | CuCl                    |           | MeCN                   | DTBP                                         | Na <sub>2</sub> CO <sub>3</sub>     | 0                      |
| 11              | CuCl                    |           | MeCN                   | DTBP                                         | K <sub>2</sub> CO <sub>3</sub>      | 0                      |
| 12              | CuCl                    |           | MeCN                   | DTBP                                         | Cs <sub>2</sub> CO <sub>3</sub>     | 0                      |
| 13              | CuCl                    |           | toluene                | DTBP                                         | Li <sub>2</sub> CO <sub>3</sub>     | 33                     |
| 14              | CuCl                    |           | THF                    | DTBP                                         | Li <sub>2</sub> CO <sub>3</sub>     | 0                      |
| 15              | CuCl                    |           | dioxane                | DTBP                                         | Li <sub>2</sub> CO <sub>3</sub>     | 0                      |
| 16              | CuCl                    |           | MeCN/PhMe = 1:1        | DTBP                                         | Li <sub>2</sub> CO <sub>3</sub>     | 61                     |
| <b>17</b>       | <b>CuCl<sub>2</sub></b> |           | <b>MeCN/PhMe = 1:1</b> | <b>DTBP</b>                                  | <b>Li<sub>2</sub>CO<sub>3</sub></b> | <b>75</b>              |
| 18 <sup>c</sup> | CuCl <sub>2</sub>       |           | MeCN/PhMe = 1:1        | DTBP                                         | Li <sub>2</sub> CO <sub>3</sub>     | 45                     |
| 19 <sup>d</sup> | CuCl <sub>2</sub>       |           | MeCN/PhMe = 1:1        | DTBP                                         | Li <sub>2</sub> CO <sub>3</sub>     | 70                     |
| 20              |                         |           | MeCN/PhMe = 1:1        | DTBP                                         | Li <sub>2</sub> CO <sub>3</sub>     | 0                      |

<sup>a</sup> Standard reaction conditions: **1a** (0.3 mmol), **2a** (0.2 mmol), **3a** (0.4 mmol), copper salt (0.02 mmol), oxidant (0.6 mmol) and base (0.6 mmol) in solvent (2.0 mL) under N<sub>2</sub>, heated at 100 °C for 24 h. <sup>b</sup> Isolated yield. <sup>c</sup> 10% 1,10-phen as ligand. <sup>d</sup> Under O<sub>2</sub> atmosphere.

We used cheap and readily available aniline **1a**, *N*-phenyl maleimide **2a**, diphenylphosphine oxide **3a** as a model substrate, and performed the radical multi-component aminophosphinoylation to examine our assumptions (Table 1). According to our previous experience of maleimide chemistry, we focused on the cheap copper catalysts. After simple optimization of reaction conditions, we found that using DTBP as a free radical oxidant and CuCl as a catalyst, the desired product **4a** was obtained with a yield of 11% (entry 1). A variety of copper salts were further screened, and the result showed that only copper halide could promote the reaction smoothly, while other copper catalysts had no catalytic ability (entries 1-4). Further evaluation of oxidants, such as 70% TBHP, K<sub>2</sub>S<sub>2</sub>O<sub>8</sub>, Mn(OAc)<sub>3</sub> and TBPB displayed relatively lower yields than DTBP (entries 5-8). Some *P*-Michael addition of maleimide unwished byproduct was formed during the reaction optimization. In other words, aniline did not rapidly capture the intermediate of carbon free radical, thus reducing the conversion efficiency of raw materials. Therefore, the organic and inorganic bases commonly used in the laboratory were screened (entries 9-12), and Li<sub>2</sub>CO<sub>3</sub> as a base really improve the yield of the target product and the reaction became relatively clean. It was found that the choice of reaction solvent is very important for the access of the target product. Using weak coordination ethers (entries 14, 15), where there is no product, a mix of CH<sub>3</sub>CN / toluene increased the yield to 61% (entry 16). Subsequently, we re-screened the effect of a series of useful copper salts in the early stage and found that CuCl<sub>2</sub> showed the best catalytic performance (entry 17). Next, some additives or ligands were added into the catalytic system in an attempt to improve the yield of the target product. Surprisingly, the introduction of a bidentate ligand (such as 1, 10-phen) led to a sharp drop in yield (entry 18), which may be due to the ligand occupied the coordination position of the copper ion center and reducing its Lewis acidity. In addition, the current radical cascade reaction is insensitive to the reaction atmosphere, and a considerable yield can still be obtained under oxygen conditions (entry 19). A control experiment suggested that the loss of copper catalyst led to failure of the transformation (entry 20).

## General Experimental Procedures

### General Procedure of Radical Aminophosphinoylation of Maleimides with Anilines and Diarylphosphine Oxides:

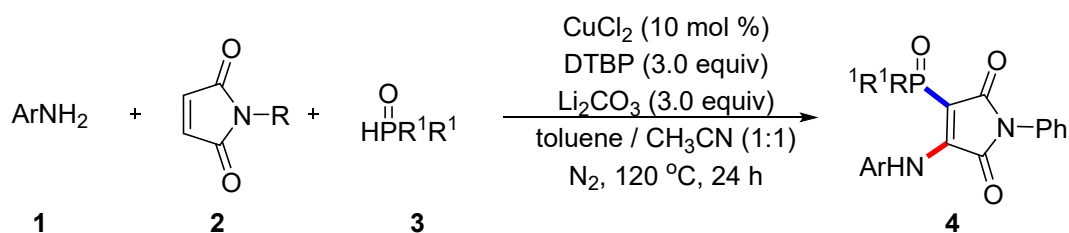

A 25 mL Schlenk tube equipped with a stir bar was charged with arylamine (0.3 mmol), maleimide (0.2 mmol), diarylphosphine oxides (0.4 mmol), CuCl<sub>2</sub> (0.02 mmol), Li<sub>2</sub>CO<sub>3</sub> (0.6 mmol), 2 mL mixture solvent (toluene / CH<sub>3</sub>CN = 1:1) and DTBP (0.6 mmol). The tube was fitted with a rubber septum, and then it was evacuated and refilled with N<sub>2</sub> three times, then the septum was replaced by a Teflon screwcap under N<sub>2</sub> flow. The reaction mixture was stirred at 120 °C for 24 h. After cooling down, the reaction mixture was diluted with 10 mL of ethyl ether, filtered through a pad of silica gel, followed by washing the pad of the silica gel with the same solvent (20



mL), concentrated under reduced pressure. The residue was then purified by flash chromatography on silica gel to provide the corresponding product.

### 5mmol Scale Reaction Synthesis:

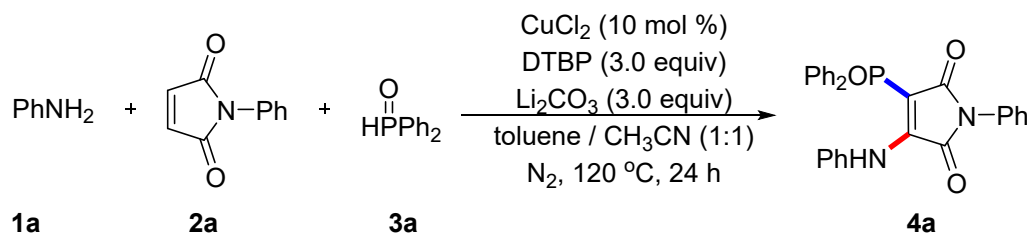

A 125 mL Schlenk tube equipped with a stir bar was charged with aniline (7.5 mmol), *N*-Phenylmaleimide (5.0 mmol), diphenylphosphine oxide (10.0 mmol),  $\text{CuCl}_2$  (0.50 mmol),  $\text{Li}_2\text{CO}_3$  (15.0 mmol), 50 mL mixture solvent (toluene /  $\text{CH}_3\text{CN}$  = 1:1) and DTBP (15.0 mmol). The tube was fitted with a rubber septum, and then it was evacuated and refilled with  $\text{N}_2$  three times, then the septum was replaced by a Teflon screwcap under  $\text{N}_2$  flow. The reaction mixture was stirred at 120 °C for 24 h. Finally, the crude product was purified by flash chromatography on silica gel (petroleum ether : EtOAc = 9 : 1) directly to give the desired product **4a** (1624.4 mg) in 70% yield as a yellow liquid.

### Mechanistic Studies

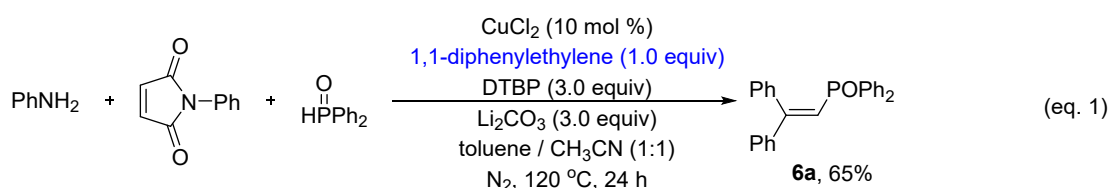

A 125 mL Schlenk tube equipped with a stir bar was charged with aniline (0.3 mmol), *N*-Phenylmaleimide (0.2 mmol), diphenylphosphine oxide (0.4 mmol),  $\text{CuCl}_2$  (0.02 mmol),  $\text{Li}_2\text{CO}_3$  (0.6 mmol), 1,1-diphenylethylene (0.2 mmol), 2 mL mixture solvent (toluene /  $\text{CH}_3\text{CN}$  = 1:1) and DTBP (0.6 mmol). The tube was fitted with a rubber septum, and then it was evacuated and refilled with  $\text{N}_2$  three times, then the septum was replaced by a Teflon screwcap under  $\text{N}_2$  flow. The reaction mixture was stirred at 120 °C. After stirring for 24 h, the reaction mixture was cooled to room temperature and the reaction was filtered through a pad of Celite and diluted with ethyl acetate (10 mL), the radical phosphinoylation product **6a** was isolated in 65%.

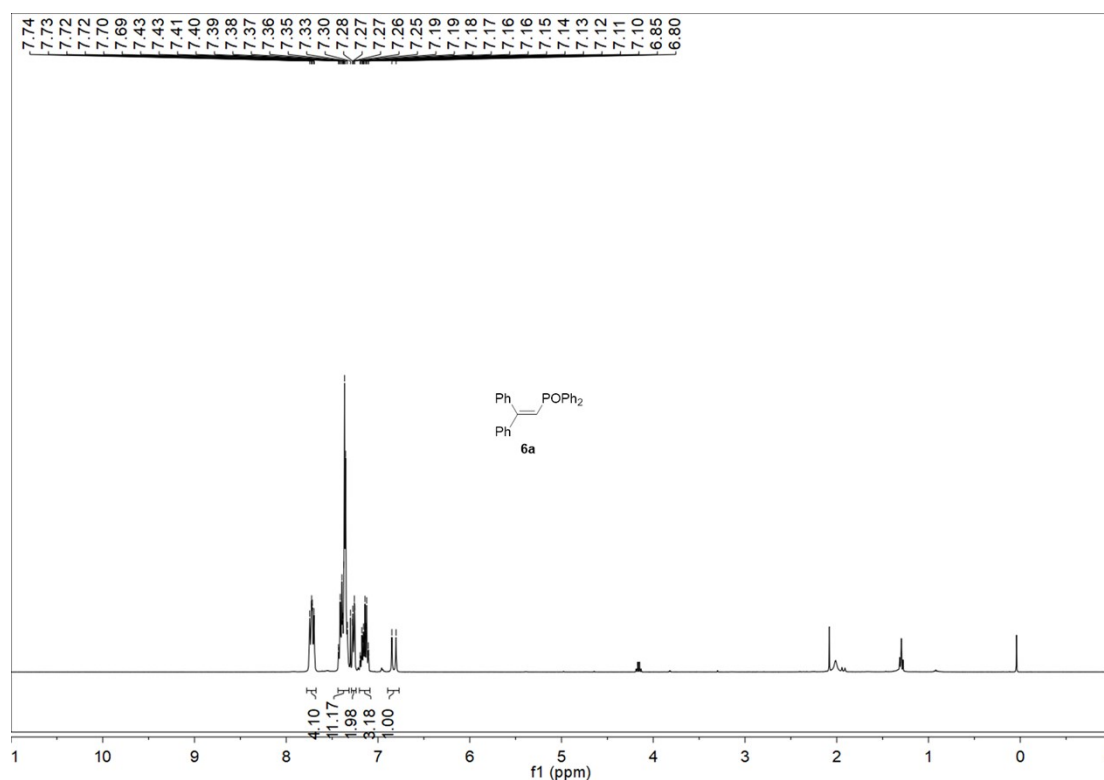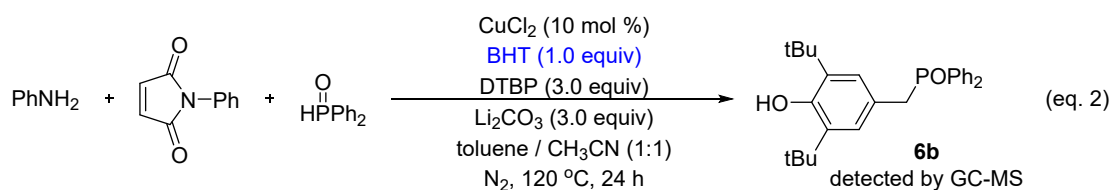

A 125 mL Schlenk tube equipped with a stir bar was charged with aniline (0.3 mmol), *N*-Phenylmaleimide (0.2 mmol), diphenylphosphine oxide (0.4 mmol), CuCl<sub>2</sub> (0.02 mmol), Li<sub>2</sub>CO<sub>3</sub> (0.6 mmol), BHT (0.2 mmol), 2 mL mixture solvent (toluene / CH<sub>3</sub>CN = 1:1) and DTBP (0.6 mmol). The tube was fitted with a rubber septum, and then it was evacuated and refilled with N<sub>2</sub> three times, then the septum was replaced by a Teflon screwcap under N<sub>2</sub> flow. The reaction mixture was stirred at 120 °C. After stirring for 24 h, the reaction mixture was cooled to room temperature and the reaction was filtered through a pad of Celite and diluted with ethyl acetate (10 mL), the radical trapped product **6b** was detected by GC-MS.

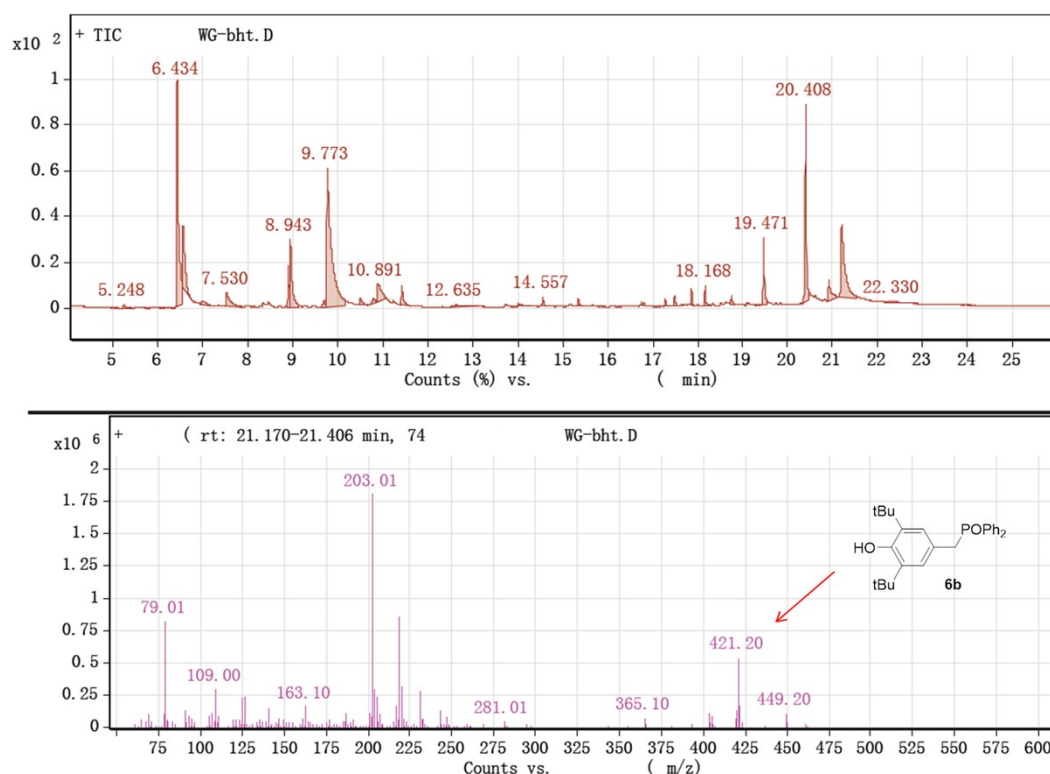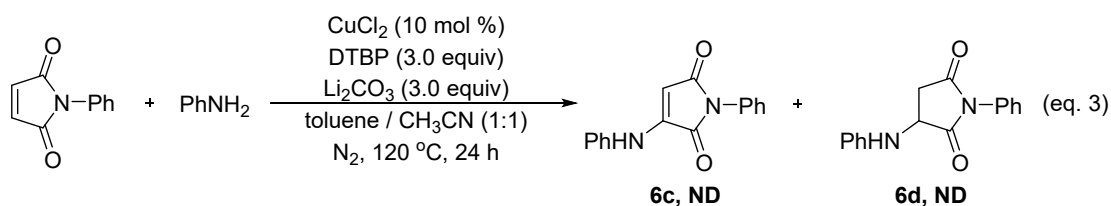

A 125 mL Schlenk tube equipped with a stir bar was charged with aniline (0.3 mmol), *N*-Phenylmaleimide (0.2 mmol), CuCl<sub>2</sub> (0.02 mmol), Li<sub>2</sub>CO<sub>3</sub> (0.6 mmol), 1,1-diphenylethylene (0.2 mmol), 2 mL mixture solvent (toluene / CH<sub>3</sub>CN = 1:1) and DTBP (0.6 mmol). The tube was fitted with a rubber septum, and then it was evacuated and refilled with N<sub>2</sub> three times, then the septum was replaced by a Teflon screwcap under N<sub>2</sub> flow. The reaction mixture was stirred at 120 °C. After stirring for 24 h, the reaction mixture was cooled to room temperature and the reaction was filtered through a pad of Celite and diluted with ethyl acetate (10 mL), the oxidative amination **6c** and *N*-Michael addition **6d** products did not detected by GC-MS and HRMS.

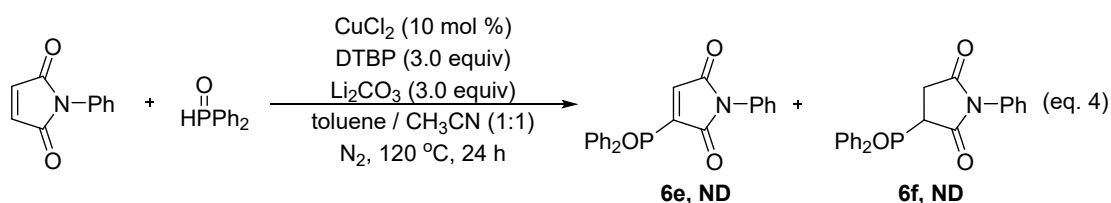

A 125 mL Schlenk tube equipped with a stir bar was charged with *N*-Phenylmaleimide (0.2 mmol), diphenylphosphine oxide (0.4 mmol), CuCl<sub>2</sub> (0.02 mmol), Li<sub>2</sub>CO<sub>3</sub> (0.6 mmol), 1,1-diphenylethylene (0.2 mmol), 2 mL mixture solvent (toluene / CH<sub>3</sub>CN = 1:1) and DTBP (0.6 mmol). The tube was fitted with a rubber septum, and then it was evacuated and refilled with N<sub>2</sub>

three times, then the septum was replaced by a Teflon screwcap under N<sub>2</sub> flow. The reaction mixture was stirred at 120 °C. After stirring for 24 h, the reaction mixture was cooled to room temperature and the reaction was filtered through a pad of Celite and diluted with ethyl acetate (10 mL), the oxidative phosphinoylation **6e** and *P*-Michael addition **6f** products did not detected by GC-MS and HRMS.

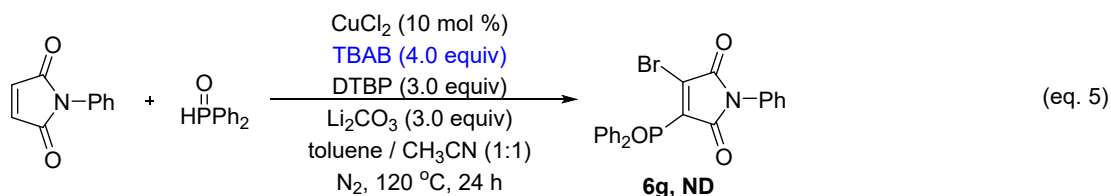

A 125 mL Schlenk tube equipped with a stir bar was charged with *N*-Phenylmaleimide (0.2 mmol), diphenylphosphine oxide (0.4 mmol), TBAB (0.8 mmol), CuCl<sub>2</sub> (0.02 mmol), Li<sub>2</sub>CO<sub>3</sub> (0.6 mmol), 1,1-diphenylethylene (0.2 mmol), 2 mL mixture solvent (toluene / CH<sub>3</sub>CN = 1:1) and DTBP (0.6 mmol). The tube was fitted with a rubber septum, and then it was evacuated and refilled with N<sub>2</sub> three times, then the septum was replaced by a Teflon screwcap under N<sub>2</sub> flow. The reaction mixture was stirred at 120 °C. After stirring for 24 h, the reaction mixture was cooled to room temperature and the reaction was filtered through a pad of Celite and diluted with ethyl acetate (10 mL), the oxidative phosphinobromination **6g** product did not detected by GC-MS and HRMS.

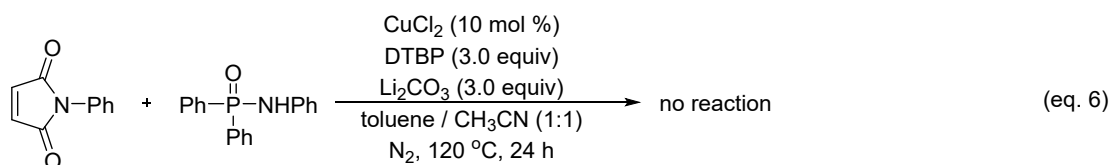

A 125 mL Schlenk tube equipped with a stir bar was charged with *N*-Phenylmaleimide (0.2 mmol), *N,P,P*-triphenylphosphinic amide (0.4 mmol), CuCl<sub>2</sub> (0.02 mmol), Li<sub>2</sub>CO<sub>3</sub> (0.6 mmol), 1,1-diphenylethylene (0.2 mmol), 2 mL mixture solvent (toluene / CH<sub>3</sub>CN = 1:1) and DTBP (0.6 mmol). The tube was fitted with a rubber septum, and then it was evacuated and refilled with N<sub>2</sub> three times, then the septum was replaced by a Teflon screwcap under N<sub>2</sub> flow. The reaction mixture was stirred at 120 °C. After stirring for 24 h, the reaction mixture was cooled to room temperature and the reaction was filtered through a pad of Celite and diluted with ethyl acetate (10 mL), no reaction was observed on TLC, except with a lot of raw starting materials.

## Characterization of Products in Details :

### 3-(diphenylphosphoryl)-1-phenyl-4-(phenylamino)-1H-pyrrole-2,5-dione

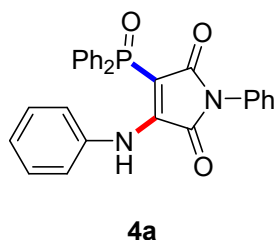

Following the general procedure, using (petroleum ether : EtOAc = 9 : 1) as the eluant afforded a yellow liquid (69.6 mg, 75% yield). **<sup>1</sup>H NMR** (400 MHz, CDCl<sub>3</sub>): δ 10.97 (s, 1H), 8.01 (t, J = 8.8 Hz, 4H), 7.63 (t, J = 7.3 Hz, 2H), 7.56 (t, J = 7.4 Hz, 4H), 7.44-7.30 (m, 10H); **<sup>13</sup>C NMR** (100 MHz, CDCl<sub>3</sub>): δ 168.54 (d, J = 12.0 Hz), 162.90 (d, J = 12.7 Hz), 155.98 (d, J = 6.1 Hz), 136.79, 132.54 (d, J = 110 Hz), 132.52 (d, J = 2.8 Hz), 131.56 (d, J = 11.0 Hz), 131.38, 128.95, 128.74 (d, J = 12.9 Hz), 127.79, 127.34, 126.19, 125.04, 113.98, 88.20 (d, J = 117.7 Hz); **<sup>31</sup>P NMR** (162 MHz, CDCl<sub>3</sub>): δ 29.38; **HRMS** (ESI): calcd for C<sub>28</sub>H<sub>22</sub>N<sub>2</sub>O<sub>3</sub>P [M + H]<sup>+</sup> 465.1368, found 465.1368.

### 3-(diphenylphosphoryl)-1-phenyl-4-(p-tolylamino)-1H-pyrrole-2,5-dione

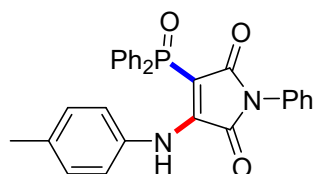

**4b**

Following the general procedure, using (petroleum ether : EtOAc = 9 : 1) as the eluant afforded a yellow liquid (70.7 mg, 74% yield). **<sup>1</sup>H NMR** (400 MHz, CDCl<sub>3</sub>): δ 10.90 (s, 1H), 8.00 (dd, J = 13.1, 7.2 Hz, 4H), 7.64-7.60 (m, 2H), 7.58-7.53 (m, 4H), 7.44-7.40 (m, 2H), 7.36-7.32 (m, 3H), 7.26-7.19 (m, 4H), 2.39 (s, 3H); **<sup>13</sup>C NMR** (100 MHz, CDCl<sub>3</sub>): δ 168.52 (d, J = 12.5 Hz), 162.84 (d, J = 14.2 Hz), 156.08, 137.34, 134.17, 132.58 (d, J = 110 Hz), 132.42 (d, J = 2.9 Hz), 131.52 (d, J = 11.4 Hz), 131.38, 129.53, 128.87, 128.67 (d, J = 12.9 Hz), 127.68, 126.12, 124.93, 87.45 (d, J = 118.4 Hz), 21.18; **<sup>31</sup>P NMR** (162 MHz, CDCl<sub>3</sub>): δ 29.42; **HRMS** (ESI): calcd for C<sub>29</sub>H<sub>24</sub>N<sub>2</sub>O<sub>3</sub>P [M + H]<sup>+</sup> 479.1525, found 479.1523.

### 3-((3,5-dimethylphenyl)amino)-4-(diphenylphosphoryl)-1-phenyl-1H-pyrrole-2,5-dione

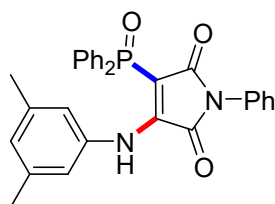

**4c**

Following the general procedure, using (petroleum ether : EtOAc = 9 : 1) as the eluant afforded a

yellow liquid (75.8 mg, 77% yield). **<sup>1</sup>H NMR** (400 MHz, CDCl<sub>3</sub>): δ 10.92 (s, 1H), 7.99 (dd, *J* = 13.1, 7.2 Hz, 4H), 7.64-7.59 (m, 2H), 7.57-7.53 (m, 4H), 7.45-7.41 (m, 2H), 7.37-7.34 (m, 3H), 7.00 (s, 2H), 6.95 (s, 1H), 2.34 (s, 6H); **<sup>13</sup>C NMR** (100 MHz, CDCl<sub>3</sub>): δ 168.54 (d, *J* = 12.3 Hz), 162.81 (d, *J* = 13.2 Hz), 156.20, 138.66, 136.58, 132.62 (d, *J* = 110 Hz), 132.41 (d, *J* = 2.9 Hz), 131.53 (d, *J* = 11.4 Hz), 131.43, 129.09, 128.92, 128.67 (d, *J* = 12.9 Hz), 127.72, 126.20, 122.64, 87.55 (d, *J* = 118.3 Hz), 21.28; **<sup>31</sup>P NMR** (162 MHz, CDCl<sub>3</sub>): δ 29.29; **HRMS** (ESI): calcd for C<sub>30</sub>H<sub>26</sub>N<sub>2</sub>O<sub>3</sub>P [M + H]<sup>+</sup> 493.1681, found 493.1680.

### 3-(diphenylphosphoryl)-1-phenyl-4-(o-tolylamino)-1H-pyrrole-2,5-dione

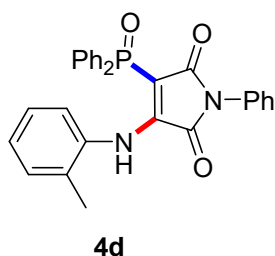

Following the general procedure, using (petroleum ether : EtOAc = 9 : 1) as the eluant afforded a yellow liquid (66.9 mg, 70% yield). **<sup>1</sup>H NMR** (400 MHz, CDCl<sub>3</sub>): δ 10.85 (s, 1H), 8.05-7.99 (m, 4H), 7.66-7.54 (m, 6H), 7.44-7.21 (m, 9H), 2.44 (s, 3H); **<sup>13</sup>C NMR** (100 MHz, CDCl<sub>3</sub>): δ 168.55 (d, *J* = 12.3 Hz), 162.86 (d, *J* = 12.9 Hz), 156.51 (d, *J* = 5.9 Hz), 135.76, 133.40, 132.60 (d, *J* = 100 Hz), 132.47 (d, *J* = 2.9 Hz), 131.51 (d, *J* = 11.3 Hz), 131.38, 130.74, 128.88, 128.72 (d, *J* = 13.0 Hz), 127.83, 127.68, 126.40, 126.35, 126.07, 87.35 (d, *J* = 118.4 Hz), 18.20; **<sup>31</sup>P NMR** (162 MHz, CDCl<sub>3</sub>): δ 29.42; **HRMS** (ESI): calcd for C<sub>29</sub>H<sub>24</sub>N<sub>2</sub>O<sub>3</sub>P [M + H]<sup>+</sup> 479.1525, found 479.1522.

### 3-(diphenylphosphoryl)-4-(mesitylamino)-1-phenyl-1H-pyrrole-2,5-dione

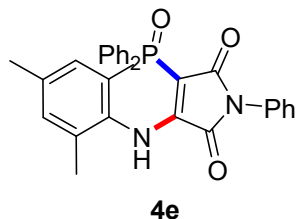

Following the general procedure, using (petroleum ether : EtOAc = 9 : 1) as the eluant afforded a yellow liquid (53.6 mg, 53% yield). **<sup>1</sup>H NMR** (400 MHz, CDCl<sub>3</sub>): δ 10.46 (s, 1H), 8.04-7.98 (m,

4H), 7.65-7.52 (m, 7H), 7.41-7.33 (m, 3H), 7.31-7.27 (m, 1H), 6.95 (s, 2H), 2.33-2.31 (m, 9H);  $^{13}\text{C}$  NMR (100 MHz,  $\text{CDCl}_3$ ):  $\delta$  168.65 (d,  $J = 12.7$  Hz), 162.75 (d,  $J = 12.9$  Hz), 157.77 (d,  $J = 3.7$  Hz), 149.27, 137.69, 134.70, 132.77 (d,  $J = 109.0$  Hz), 132.70, 132.41 (d,  $J = 2.9$  Hz), 131.49 (d,  $J = 11.3$  Hz), 131.38, 130.92, 128.87 (d,  $J = 47.0$  Hz), 128.77, 127.51, 125.87, 120.90, 85.84 (d,  $J = 119.2$  Hz), 21.14, 18.49, 17.45;  $^{31}\text{P}$  NMR (162 MHz,  $\text{CDCl}_3$ ):  $\delta$  29.42; HRMS (ESI): calcd for  $\text{C}_{31}\text{H}_{28}\text{N}_2\text{O}_3\text{P}$   $[\text{M} + \text{H}]^+$  507.1838, found 507.1837.

**methyl 2-((4-(diphenylphosphoryl)-2,5-dioxo-1-phenyl-2,5-dihydro-1H-pyrrol-3-yl)amino)benzoate**

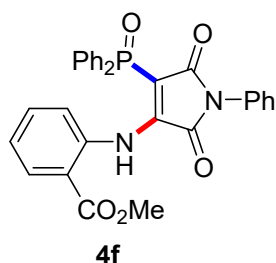

Following the general procedure, using (petroleum ether : EtOAc = 9 : 1) as the eluant afforded a yellow liquid (53.3 mg, 51% yield).  $^1\text{H}$  NMR (400 MHz,  $\text{CDCl}_3$ ):  $\delta$  11.41 (s, 1H), 8.07-8.00 (m, 5H), 7.63-7.59 (m, 2H), 7.57-7.50 (m, 5H), 7.44-7.40 (m, 3H), 7.37-7.32 (m, 4H), 3.96 (s, 3H);  $^{13}\text{C}$  NMR (100 MHz,  $\text{CDCl}_3$ ):  $\delta$  168.60 (d,  $J = 11.8$  Hz), 166.32, 163.33 (d,  $J = 12.4$  Hz), 155.37, 137.62, 132.68, 132.57 (d,  $J = 109.1$  Hz), 132.38 (d,  $J = 2.9$  Hz), 131.65 (d,  $J = 11.1$  Hz), 131.33, 128.93, 128.63 (d,  $J = 13.0$  Hz), 128.36, 127.75, 126.99, 126.72, 126.13, 123.79, 90.47 (d,  $J = 116.7$  Hz), 52.57;  $^{31}\text{P}$  NMR (162 MHz,  $\text{CDCl}_3$ ):  $\delta$  27.42; HRMS (ESI): calcd for  $\text{C}_{30}\text{H}_{24}\text{N}_2\text{O}_5\text{P}$   $[\text{M} + \text{H}]^+$  523.1423, found 523.1423.

**3-([1,1'-biphenyl]-2-ylamino)-4-(diphenylphosphoryl)-1-phenyl-1H-pyrrole-2,5-dione**

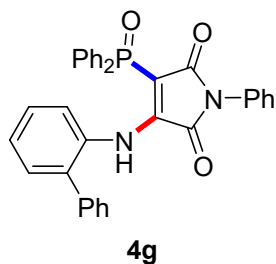

Following the general procedure, using (petroleum ether : EtOAc = 9 : 1) as the eluant afforded a

yellow liquid (59.4 mg, 55% yield). **<sup>1</sup>H NMR** (400 MHz, CDCl<sub>3</sub>): δ 10.67 (s, 1H), 7.93-7.87 (m, 4H), 7.65-7.60 (m, 2H), 7.57-7.52 (m, 4H), 7.46-7.36 (m, 8H), 7.31-7.25 (m, 2H), 7.21-7.14 (m, 4H); **<sup>13</sup>C NMR** (100 MHz, CDCl<sub>3</sub>): δ 168.36 (d, *J* = 12.3 Hz), 162.81 (d, *J* = 12.8 Hz), 157.21, 138.91, 138.37, 135.02, 132.51 (d, *J* = 109.1 Hz), 132.40 (d, *J* = 2.9 Hz), 131.55 (d, *J* = 11.3 Hz), 131.21, 130.77, 130.05, 128.73 (d, *J* = 13.5 Hz), 128.54, 128.50, 128.31, 128.12, 127.61, 127.33, 126.58, 126.04, 87.73 (d, *J* = 118.4 Hz); **<sup>31</sup>P NMR** (162 MHz, CDCl<sub>3</sub>): δ 28.94; **HRMS** (ESI): calcd for C<sub>34</sub>H<sub>26</sub>N<sub>2</sub>O<sub>3</sub>P [M + H]<sup>+</sup> 541.1681, found 541.1678.

**3-(diphenylphosphoryl)-1-phenyl-4-((4-(trifluoromethoxy)phenyl)amino)-1H-pyrrole-2,5-dione**

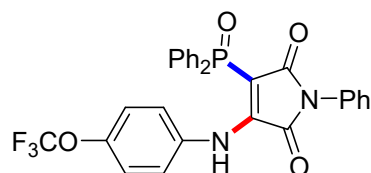

**4h**

Following the general procedure, using (petroleum ether : EtOAc = 9 : 1) as the eluant afforded a yellow solid (64.7 mg, 59% yield), Mp = 197-198°C. **<sup>1</sup>H NMR** (400 MHz, CDCl<sub>3</sub>): δ 10.96 (s, 1H), 8.03-7.98 (m, 4H), 7.65-7.61 (m, 2H), 7.59-7.54 (m, 4H), 7.46-7.33 (m, 7H), 7.25-7.22 (m, 2H); **<sup>13</sup>C NMR** (100 MHz, CDCl<sub>3</sub>): δ 168.37 (d, *J* = 12.1 Hz), 162.98 (d, *J* = 13.0 Hz), 155.71, 147.82, 135.29, 132.62 (d, *J* = 2.9 Hz), 132.23 (d, *J* = 110.1 Hz), 131.53 (d, *J* = 11.2 Hz), 131.20, 129.02, 128.77 (d, *J* = 13.0 Hz), 127.94, 126.42, 126.16, 121.35, 120.48 (q, *J* = 257.7 Hz), 89.23 (d, *J* = 116.6 Hz); **<sup>19</sup>F NMR** (375 MHz, CDCl<sub>3</sub>): δ -57.86 (s, 3F); **<sup>31</sup>P NMR** (162 MHz, CDCl<sub>3</sub>): δ 29.45; **HRMS** (ESI): calcd for C<sub>29</sub>H<sub>21</sub>N<sub>2</sub>O<sub>4</sub>F<sub>3</sub>P [M + H]<sup>+</sup> 549.1191, found 549.1188.

**3-(diphenylphosphoryl)-1-phenyl-4-(((trifluoromethyl)thio)phenyl)amino)-1H-pyrrole-2,5-dione**

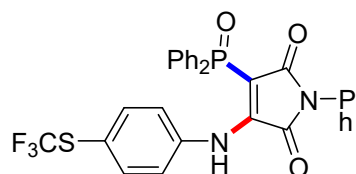

**4i**

Following the general procedure, using (petroleum ether : EtOAc = 9 : 1) as the eluant afforded a



yellow solid (68.8 mg, 61% yield), Mp = 165-166 °C. **<sup>1</sup>H NMR** (400 MHz, CDCl<sub>3</sub>): δ 11.03 (s, 3H), 7.95-7.90 (m, 4H), 7.61-7.55 (m, 4H), 7.52-7.48 (m, 4H), 7.40-7.36 (m, 4H), 7.31-7.27 (m, 3H); **<sup>13</sup>C NMR** (100 MHz, CDCl<sub>3</sub>): δ 168.24 (d, *J* = 11.6 Hz), 162.96 (d, *J* = 12.7 Hz), 155.36, 139.30, 136.91, 132.70 (d, *J* = 2.9 Hz), 131.97 (d, *J* = 110.1 Hz), 131.55 (d, *J* = 11.4 Hz), 131.13, 131.01, 129.05, 128.79 (d, *J* = 13.2 Hz), 128.01, 126.17, 125.29, 120.79 (q, *J* = 324.8 Hz), 90.72 (d, *J* = 115.1 Hz); **<sup>19</sup>F NMR** (375 MHz, CDCl<sub>3</sub>): δ -42.68 (s, 3F); **<sup>31</sup>P NMR** (162 MHz, CDCl<sub>3</sub>): δ 29.41; **HRMS** (ESI): calcd for C<sub>29</sub>H<sub>21</sub>N<sub>2</sub>O<sub>3</sub>F<sub>3</sub>PS [M + H]<sup>+</sup> 565.0963, found 565.0961.

### 3-(diphenylphosphoryl)-4-((4-methoxyphenyl)amino)-1-phenyl-1H-pyrrole-2,5-dione

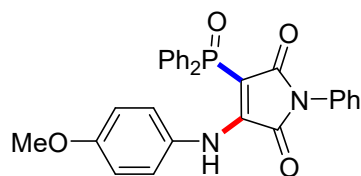

**4j**

Following the general procedure, using (petroleum ether : EtOAc = 9 : 1) as the eluant afforded a yellow liquid (70.2 mg, 71% yield). **<sup>1</sup>H NMR** (400 MHz, CDCl<sub>3</sub>): δ 10.87 (s, 1H), 8.04-7.99 (m, 4H), 7.64-7.54 (m, 6H), 7.44-7.40 (m, 2H), 7.37-7.29 (m, 5H), 6.92 (d, *J* = 8.5 Hz, 2H), 3.84 (s, 3H); **<sup>13</sup>C NMR** (100 MHz, CDCl<sub>3</sub>): δ 168.56 (d, *J* = 12.4 Hz), 162.89 (d, *J* = 12.9 Hz), 158.79, 156.16, 132.68 (d, *J* = 109.1 Hz), 132.48, 131.54 (d, *J* = 11.2 Hz), 131.42, 129.64, 128.92, 128.72 (d, *J* = 12.9 Hz), 127.73, 126.52, 126.18, 114.13, 86.97 (d, *J* = 118.6 Hz), 55.53; **<sup>31</sup>P NMR** (162 MHz, CDCl<sub>3</sub>): δ 29.46; **HRMS** (ESI): calcd for C<sub>29</sub>H<sub>24</sub>N<sub>2</sub>O<sub>4</sub>P [M + H]<sup>+</sup> 495.1474, found 495.1470.

### 3-(diphenylphosphoryl)-4-((4-fluorophenyl)amino)-1-phenyl-1H-pyrrole-2,5-dione

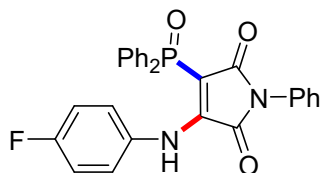

**4k**

Following the general procedure, using (petroleum ether : EtOAc = 9 : 1) as the eluant afforded a yellow solid (58.8 mg, 61% yield), Mp = 170-171 °C. **<sup>1</sup>H NMR** (400 MHz, CDCl<sub>3</sub>): δ 10.87 (s, 1H), 8.01-7.96 (m, 4H), 7.64-7.53 (m, 6H), 7.44-7.40 (m, 2H), 7.34-7.29 (m, 5H), 7.10-7.06 (m,

2H);  $^{13}\text{C}$  NMR (100 MHz,  $\text{CDCl}_3$ ):  $\delta$  168.44 (d,  $J = 12.1$  Hz), 162.90 (d,  $J = 14.7$  Hz), 161.59 (d,  $J = 247.2$  Hz), 155.99, 132.78, 132.54 (d,  $J = 3.3$  Hz), 132.39 (d,  $J = 109.1$  Hz), 131.51 (d,  $J = 11.3$  Hz), 131.24, 128.96, 128.72 (d,  $J = 13.0$  Hz), 127.83, 127.05 (d,  $J = 8.5$  Hz), 126.12, 115.84 (d,  $J = 23.0$  Hz), 88.20 (d,  $J = 117.2$  Hz);  $^{19}\text{F}$  NMR (375 MHz,  $\text{CDCl}_3$ ):  $\delta$  -114.04 (s, 1F);  $^{31}\text{P}$  NMR (162 MHz,  $\text{CDCl}_3$ ):  $\delta$  29.44; HRMS (ESI): calcd for  $\text{C}_{28}\text{H}_{21}\text{N}_2\text{O}_3\text{FP}$   $[\text{M} + \text{H}]^+$  483.1274, found 483.1271.

### 3-((4-chlorophenyl)amino)-4-(diphenylphosphoryl)-1-phenyl-1H-pyrrole-2,5-dione

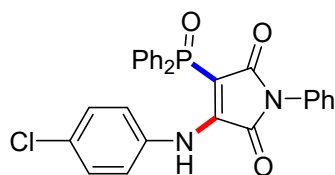

**4l**

Following the general procedure, using (petroleum ether : EtOAc = 9 : 1) as the eluant afforded a yellow solid (68.7 mg, 69% yield), Mp = 199-200°C.  $^1\text{H}$  NMR (400 MHz,  $\text{CDCl}_3$ ):  $\delta$  10.95 (s, 1H), 8.04-7.98 (m, 4H), 7.66-7.55 (m, 6H), 7.46-7.42 (m, 2H), 7.38-7.31 (m, 7H);  $^{13}\text{C}$  NMR (100 MHz,  $\text{CDCl}_3$ ):  $\delta$  168.40 (d,  $J = 11.7$  Hz), 162.94 (d,  $J = 12.9$  Hz), 155.71, 135.35, 132.89, 132.61 (d,  $J = 2.9$  Hz), 132.28 (d,  $J = 109.1$  Hz), 131.54 (d,  $J = 11.3$  Hz), 131.23, 129.07, 129.00, 128.77 (d,  $J = 13.0$  Hz), 127.89, 126.35, 126.13, 88.95 (d,  $J = 116.5$  Hz);  $^{31}\text{P}$  NMR (162 MHz,  $\text{CDCl}_3$ ):  $\delta$  29.43; HRMS (ESI): calcd for  $\text{C}_{28}\text{H}_{21}\text{N}_2\text{O}_3\text{PCl}$   $[\text{M} + \text{H}]^+$  499.0978, found 499.0975.

### 3-(diphenylphosphoryl)-4-((4-iodophenyl)amino)-1-phenyl-1H-pyrrole-2,5-dione

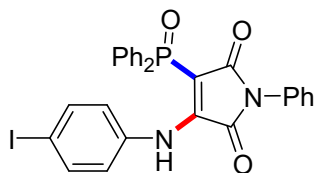

**4m**

Following the general procedure, using (petroleum ether : EtOAc = 9 : 1) as the eluant afforded a yellow solid (87.3 mg, 74% yield), Mp = 192-193°C.  $^1\text{H}$  NMR (400 MHz,  $\text{CDCl}_3$ ):  $\delta$  10.93 (s, 1H), 8.01-7.96 (m, 4H), 7.70 (d,  $J = 8.5$  Hz, 2H), 7.65-7.61 (m, 2H), 7.58-7.53 (m, 4H), 7.45-7.41 (m, 2H), 7.35-7.32 (m, 3H), 7.13 (d,  $J = 8.5$  Hz, 2H);  $^{13}\text{C}$  NMR (100 MHz,  $\text{CDCl}_3$ ):  $\delta$  168.35 (d,  $J$

= 11.9 Hz), 162.91 (d,  $J = 12.8$  Hz), 155.53, 137.98, 136.55, 132.59 (d,  $J = 2.9$  Hz), 132.22 (d,  $J = 109.1$  Hz), 131.52 (d,  $J = 11.2$  Hz), 131.21, 128.98, 128.74 (d,  $J = 13.0$  Hz), 127.88, 126.73, 126.11, 91.93, 89.24 (d,  $J = 116.5$  Hz);  **$^{31}\text{P}$  NMR** (162 MHz,  $\text{CDCl}_3$ ):  $\delta$  29.40; **HRMS** (ESI): calcd for  $\text{C}_{28}\text{H}_{21}\text{N}_2\text{O}_3\text{PI}$   $[\text{M} + \text{H}]^+$  591.0334, found 591.0334.

### 3-(diphenylphosphoryl)-4-((4-(methylsulfonyl)phenyl)amino)-1-phenyl-1H-pyrrole-2,5-dione

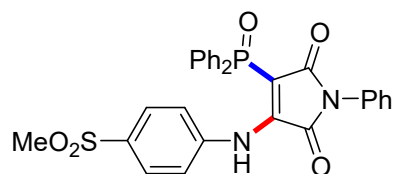

**4n**

Following the general procedure, using (petroleum ether : EtOAc = 9 : 1) as the eluant afforded a yellow solid (78.1 mg, 72% yield), Mp = 137-138°C.  **$^1\text{H}$  NMR** (400 MHz,  $\text{CDCl}_3$ ):  $\delta$  11.18 (s, 1H), 8.00-7.86 (m, 6H), 7.65-7.51 (m, 8H), 7.46-7.40 (m, 2H), 7.37-7.29 (m, 3H), 3.05 (s, 3H);  **$^{13}\text{C}$  NMR** (100 MHz,  $\text{CDCl}_3$ ):  $\delta$  168.11 (d,  $J = 12.2$  Hz), 163.04 (d,  $J = 12.0$  Hz), 155.09, 141.69, 137.99, 132.81, 131.71 (d,  $J = 110.1$  Hz), 131.57 (d,  $J = 11.5$  Hz), 131.04, 129.09, 128.83 (d,  $J = 12.9$  Hz), 128.36, 128.10, 126.16, 124.67, 92.27 (d,  $J = 114.3$  Hz), 44.65;  **$^{31}\text{P}$  NMR** (162 MHz,  $\text{CDCl}_3$ ):  $\delta$  29.39; **HRMS** (ESI): calcd for  $\text{C}_{29}\text{H}_{24}\text{N}_2\text{O}_5\text{PS}$   $[\text{M} + \text{H}]^+$  543.1144, found 543.1143.

### 3-((4-acetylphenyl)amino)-4-(diphenylphosphoryl)-1-phenyl-1H-pyrrole-2,5-dione

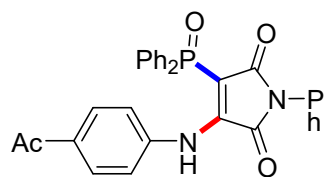

**4o**

Following the general procedure, using (petroleum ether : EtOAc = 9 : 1) as the eluant afforded a yellow liquid (77.9 mg, 77% yield).  **$^1\text{H}$  NMR** (400 MHz,  $\text{CDCl}_3$ ):  $\delta$  11.16 (s, 1H), 8.03-7.97 (m, 6H), 7.65-7.61 (m, 2H), 7.59-7.54 (m, 4H), 7.48-7.42 (m, 4H), 7.37-7.32 (m, 3H), 2.62 (s, 3H);  **$^{13}\text{C}$  NMR** (100 MHz,  $\text{CDCl}_3$ ):  $\delta$  196.87, 168.26 (d,  $J = 11.7$  Hz), 162.95 (d,  $J = 12.8$  Hz), 155.35, 140.96, 135.14, 132.69 (d,  $J = 2.9$  Hz), 132.0 (d,  $J = 110.1$  Hz), 131.56 (d,  $J = 11.3$  Hz), 131.16,

129.24, 129.02, 128.79 (d,  $J = 13.1$  Hz), 127.96, 126.14, 124.22, 90.93 (d,  $J = 115.2$  Hz), 26.66.  
 $^{31}\text{P}$  NMR (162 MHz,  $\text{CDCl}_3$ ):  $\delta$  29.36; HRMS (ESI): calcd for  $\text{C}_{30}\text{H}_{24}\text{N}_2\text{O}_4\text{P}$   $[\text{M} + \text{H}]^+$  507.1474, found 507.1475.

**3-(diphenylphosphoryl)-1-phenyl-4-((4-(trifluoromethyl)phenyl)amino)-1H-pyrrole-2,5-dione**

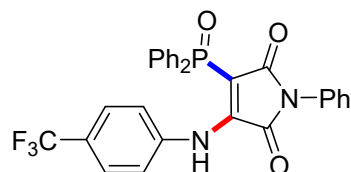

**4p**

Following the general procedure, using (petroleum ether : EtOAc = 9 : 1) as the eluant afforded a yellow solid (74.5 mg, 70% yield), Mp = 210-211 °C.  $^1\text{H}$  NMR (400 MHz,  $\text{CDCl}_3$ ):  $\delta$  11.11 (s, 1H), 8.02-7.97 (m, 4H), 7.66-7.61 (m, 4H), 7.59-7.54 (m, 4H), 7.50-7.48 (m, 2H), 7.46-7.43 (m, 2H), 7.37-7.34 (m, 3H);  $^{13}\text{C}$  NMR (100 MHz,  $\text{CDCl}_3$ ):  $\delta$  168.26 (d,  $J = 12.3$  Hz), 162.97 (d,  $J = 12.5$  Hz), 155.46, 139.87, 132.69 (d,  $J = 2.9$  Hz), 131.84 (d,  $J = 144.2$  Hz), 131.54 (d,  $J = 11.4$  Hz), 129.03, 128.79 (d,  $J = 13.0$  Hz), 128.67, 127.99, 126.12, 126.08, 126.04, 124.78, 123.91 (q,  $J = 270.36$  Hz), 90.65 (d,  $J = 115.3$  Hz);  $^{19}\text{F}$  NMR (375 MHz,  $\text{CDCl}_3$ ):  $\delta$  -62.36 (s, 3F);  $^{31}\text{P}$  NMR (162 MHz,  $\text{CDCl}_3$ ):  $\delta$  29.35; HRMS (ESI): calcd for  $\text{C}_{29}\text{H}_{21}\text{N}_2\text{O}_3\text{F}_3\text{P}$   $[\text{M} + \text{H}]^+$  533.1242, found 533.1241.

**1-(tert-butyl)-3-(diphenylphosphoryl)-4-(phenylamino)-1H-pyrrole-2,5-dione**

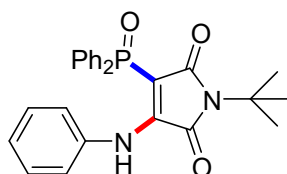

**4q**

Following the general procedure, using (petroleum ether : EtOAc = 9 : 1) as the eluant afforded a yellow liquid (63.9 mg, 72% yield).  $^1\text{H}$  NMR (400 MHz,  $\text{CDCl}_3$ ):  $\delta$  10.55 (s, 1H), 7.96-7.90 (m, 4H), 7.63-7.52 (m, 6H), 7.40-7.36 (m, 2H), 7.31-7.28 (m, 3H), 1.57 (s, 9H);  $^{13}\text{C}$  NMR (100 MHz,

CDCl<sub>3</sub>):  $\delta$  171.03 (d,  $J$  = 12.4 Hz), 164.91 (d,  $J$  = 13.6 Hz), 155.77, 137.31, 132.85 (d,  $J$  = 109.1 Hz), 132.27 (d,  $J$  = 2.9 Hz), 131.52 (d,  $J$  = 11.2 Hz), 128.83, 128.58 (d,  $J$  = 12.9 Hz), 126.84, 124.86, 88.80 (d,  $J$  = 119.6 Hz), 57.89, 29.08; **<sup>31</sup>P NMR** (162 MHz, CDCl<sub>3</sub>):  $\delta$  29.25; **HRMS** (ESI): calcd for C<sub>26</sub>H<sub>26</sub>N<sub>2</sub>O<sub>3</sub>P [M + H]<sup>+</sup> 445.1681, found 445.1682.

### 3-(diphenylphosphoryl)-1-methyl-4-(phenylamino)-1H-pyrrole-2,5-dione

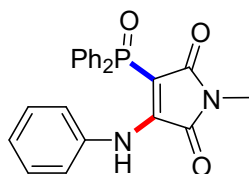

**4r**

Following the general procedure, using (petroleum ether : EtOAc = 9 : 1) as the eluant afforded a yellow solid (49.1 mg, 61% yield), Mp = 137-138°C. **<sup>1</sup>H NMR** (400 MHz, CDCl<sub>3</sub>):  $\delta$  10.80 (s, 1H), 7.97-7.92 (m, 4H), 7.63-7.52 (m, 6H), 7.42-7.38 (m, 2H), 7.42-7.32 (m, 3H), 2.97 (s, 3H); **<sup>13</sup>C NMR** (100 MHz, CDCl<sub>3</sub>):  $\delta$  169.72 (d,  $J$  = 12.1 Hz), 164.14 (d,  $J$  = 13.0 Hz), 156.57, 136.88, 132.68 (d,  $J$  = 109.1 Hz), 132.41 (d,  $J$  = 3.3 Hz), 131.48 (d,  $J$  = 11.3 Hz), 128.88, 128.64 (d,  $J$  = 12.9 Hz), 127.18, 124.86, 88.01 (d,  $J$  = 119.1 Hz), 23.91. **<sup>31</sup>P NMR** (162 MHz, CDCl<sub>3</sub>):  $\delta$  29.25; **HRMS** (ESI): calcd for C<sub>23</sub>H<sub>20</sub>N<sub>2</sub>O<sub>3</sub>P [M + H]<sup>+</sup> 403.1212, found 403.1210.

### 1-benzyl-3-(diphenylphosphoryl)-4-(phenylamino)-1H-pyrrole-2,5-dione

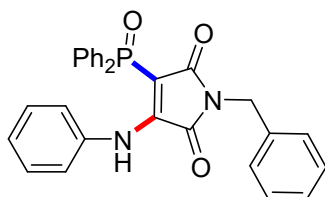

**4s**

Following the general procedure, using (petroleum ether : EtOAc = 9 : 1) as the eluant afforded a yellow liquid (66.9 mg, 70% yield). **<sup>1</sup>H NMR** (400 MHz, CDCl<sub>3</sub>):  $\delta$  10.84 (s, 1H), 7.96-7.90 (m, 4H), 7.63-7.51 (m, 6H), 7.41-7.26 (m, 10H), 4.63 (s, 2H); **<sup>13</sup>C NMR** (100 MHz, CDCl<sub>3</sub>):  $\delta$  169.32 (d,  $J$  = 11.8 Hz), 163.77 (d,  $J$  = 12.7 Hz), 156.42 (d,  $J$  = 4.7 Hz), 136.76, 136.33, 132.64 (d,  $J$  = 109.1 Hz), 132.41 (d,  $J$  = 2.9 Hz), 131.47 (d,  $J$  = 11.4 Hz), 128.73 (d,  $J$  = 12.9 Hz), 128.71, 127.85,

127.19, 124.84, 87.97 (d,  $J = 118.5$  Hz), 41.67;  $^{31}\text{P}$  NMR (162 MHz,  $\text{CDCl}_3$ ):  $\delta$  29.29; HRMS (ESI): calcd for  $\text{C}_{29}\text{H}_{24}\text{N}_2\text{O}_3\text{P}$   $[\text{M} + \text{H}]^+$  479.1525, found 479.1524.

### 3-(diphenylphosphoryl)-1-(4-methylbenzyl)-4-(phenylamino)-1H-pyrrole-2,5-dione

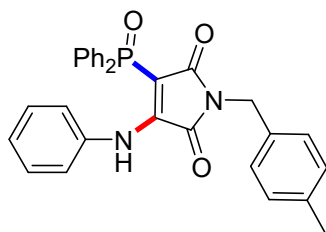

**4t**

Following the general procedure, using (petroleum ether : EtOAc = 9 : 1) as the eluant afforded a yellow liquid (70.9 mg, 72% yield).  $^1\text{H}$  NMR (400 MHz,  $\text{CDCl}_3$ ):  $\delta$  10.83 (s, 1H), 7.97-7.91 (m, 4H), 7.61 (td,  $J = 7.2, 1.6$  Hz, 2H), 7.57-7.52 (m, 4H), 7.41-7.37 (m, 2H), 7.33-7.30 (m, 3H), 7.26 (d,  $J = 7.8$  Hz, 2H), 7.14 (d,  $J = 7.8$  Hz, 2H), 4.60 (s, 2H), 2.35 (s, 3H);  $^{13}\text{C}$  NMR (100 MHz,  $\text{CDCl}_3$ ):  $\delta$  169.38 (d,  $J = 12.0$  Hz), 163.79 (d,  $J = 12.9$  Hz), 156.47, 137.61, 136.81, 133.41, 132.69 (d,  $J = 109.1$  Hz), 132.41 (d,  $J = 2.9$  Hz), 131.49 (d,  $J = 11.2$  Hz), 129.39, 128.88, 128.73 (d,  $J = 2.9$  Hz), 128.59, 127.17, 124.85, 87.96 (d,  $J = 118.6$  Hz), 41.42, 21.21;  $^{31}\text{P}$  NMR (162 MHz,  $\text{CDCl}_3$ ):  $\delta$  29.32; HRMS (ESI): calcd for  $\text{C}_{30}\text{H}_{26}\text{N}_2\text{O}_3\text{P}$   $[\text{M} + \text{H}]^+$  493.1681, found 493.1682.

### 3-(diphenylphosphoryl)-1-(4-methoxybenzyl)-4-(phenylamino)-1H-pyrrole-2,5-dione

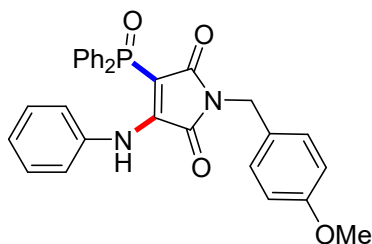

**4u**

Following the general procedure, using (petroleum ether : EtOAc = 9 : 1) as the eluant afforded a yellow liquid (72.1 mg, 71% yield).  $^1\text{H}$  NMR (400 MHz,  $\text{CDCl}_3$ ):  $\delta$  10.84 (s, 1H), 7.97-7.91 (m, 4H), 7.63-7.59 (m, 2H), 7.57-7.52 (m, 4H), 7.42-7.38 (m, 2H), 7.33-7.29 (m, 5H), 6.87-6.84 (m, 2H), 4.58 (s, 2H), 3.81 (s, 3H);  $^{13}\text{C}$  NMR (100 MHz,  $\text{CDCl}_3$ ):  $\delta$  169.40 (d,  $J = 12.0$  Hz), 163.79 (d,  $J = 12.9$  Hz), 159.26, 156.50 (d,  $J = 4.0$  Hz), 136.81, 132.69 (d,  $J = 109.1$  Hz), 132.41 (d,  $J = 2.9$

Hz), 131.49 (d,  $J = 11.3$  Hz), 130.24, 128.88, 128.65 (d,  $J = 13.0$  Hz), 127.18, 124.85, 114.04, 87.93 (d,  $J = 118.6$  Hz), 55.33, 41.13.  **$^{31}\text{P}$  NMR** (162 MHz,  $\text{CDCl}_3$ ):  $\delta$  29.34; **HRMS** (ESI): calcd for  $\text{C}_{30}\text{H}_{26}\text{N}_2\text{O}_4\text{P}$   $[\text{M} + \text{H}]^+$  509.1630, found 509.1629.

### 3-(diphenylphosphoryl)-1-(4-fluorobenzyl)-4-(phenylamino)-1H-pyrrole-2,5-dione

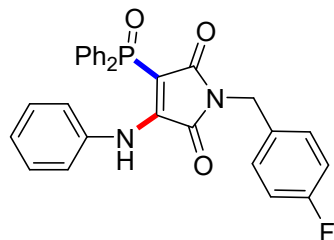

**4v**

Following the general procedure, using (petroleum ether : EtOAc = 9 : 1) as the eluant afforded a yellow liquid (75.4 mg, 76% yield).  **$^1\text{H}$  NMR** (400 MHz,  $\text{CDCl}_3$ ):  $\delta$  10.87 (s, 1H), 7.96-7.90 (m, 4H), 7.64-7.59 (m, 2H), 7.57-7.52 (m, 4H), 7.42-7.38 (m, 2H), 7.35-7.30 (m, 5H), 7.00 (t,  $J = 8.6$  Hz, 2H), 4.59 (s, 2H);  **$^{13}\text{C}$  NMR** (100 MHz,  $\text{CDCl}_3$ ):  $\delta$  169.25 (d,  $J = 12.0$  Hz), 163.73 (d,  $J = 14.3$  Hz), 162.43 (d,  $J = 247.3$  Hz), 156.42, 136.74, 132.62 (d,  $J = 109.1$  Hz), 132.45 (d,  $J = 2.9$  Hz), 132.17 (d,  $J = 3.4$  Hz), 131.90 (d,  $J = 10.1$  Hz), 131.47 (d,  $J = 11.3$  Hz), 130.64 (d,  $J = 8.2$  Hz), 128.91, 128.67 (d,  $J = 12.9$  Hz), 127.26, 124.86, 87.98 (d,  $J = 118.2$  Hz), 40.95;  **$^{19}\text{F}$  NMR** (375 MHz,  $\text{CDCl}_3$ ):  $\delta$  -114.19 (s, 1F);  **$^{31}\text{P}$  NMR** (162 MHz,  $\text{CDCl}_3$ ):  $\delta$  29.24; **HRMS** (ESI): calcd for  $\text{C}_{29}\text{H}_{23}\text{N}_2\text{O}_3\text{FP}$   $[\text{M} + \text{H}]^+$  497.1430, found 497.1429.

### 1-(4-chlorobenzyl)-3-(diphenylphosphoryl)-4-(phenylamino)-1H-pyrrole-2,5-dione

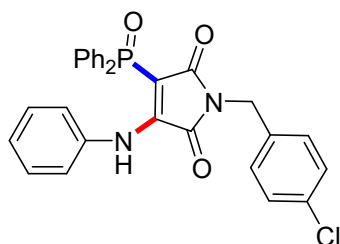

**4w**

Following the general procedure, using (petroleum ether : EtOAc = 9 : 1) as the eluant afforded a yellow solid (74.7 mg, 73% yield), Mp = 128-129°C.  **$^1\text{H}$  NMR** (400 MHz,  $\text{CDCl}_3$ ):  $\delta$  10.86 (s, 1H), 7.95-7.89 (m, 4H), 7.64-7.59 (m, 2H), 7.57-7.52 (m, 4H), 7.42-7.38 (m, 2H), 7.34-7.28 (m, 7H), 4.58 (s, 2H);  **$^{13}\text{C}$  NMR** (100 MHz,  $\text{CDCl}_3$ ):  $\delta$  169.17 (d,  $J = 12.0$  Hz), 163.70 (d,  $J = 13.0$

Hz), 156.42, 136.69, 134.75, 133.82, 132.59 (d,  $J = 109.1$  Hz), 132.46 (d,  $J = 2.8$  Hz), 131.45 (d,  $J = 11.3$  Hz), 130.20, 128.90, 128.88, 128.67 (d,  $J = 13.0$  Hz), 127.29, 124.86, 87.99 (d,  $J = 118.1$  Hz), 40.98;  $^{31}\text{P}$  NMR (162 MHz,  $\text{CDCl}_3$ ):  $\delta$  29.22; HRMS (ESI): calcd for  $\text{C}_{29}\text{H}_{23}\text{N}_2\text{O}_3\text{PCl}$  [ $\text{M} + \text{H}$ ] $^+$  513.1135, found 513.1135.

**1-(4-bromobenzyl)-3-(diphenylphosphoryl)-4-(phenylamino)-1H-pyrrole-2,5-dione**

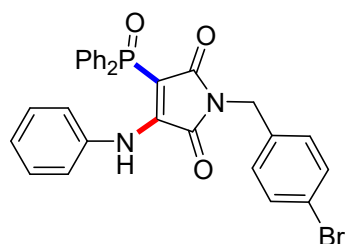

**4x**

Following the general procedure, using (petroleum ether : EtOAc = 9 : 1) as the eluant afforded a yellow liquid (83.4 mg, 75% yield).  $^1\text{H}$  NMR (400 MHz,  $\text{CDCl}_3$ ):  $\delta$  10.85 (s, 1H), 7.94-7.89 (m, 4H), 7.64-7.59 (m, 2H), 7.57-7.52 (m, 4H), 7.45-7.38 (m, 4H), 7.34-7.30 (m, 3H), 7.23-7.21 (m, 2H), 4.56 (s, 2H);  $^{13}\text{C}$  NMR (100 MHz,  $\text{CDCl}_3$ ):  $\delta$  169.16 (d,  $J = 11.8$  Hz), 163.69 (d,  $J = 12.4$  Hz), 156.36, 136.68, 135.25, 132.54 (d,  $J = 109.1$  Hz), 132.48 (d,  $J = 3.1$  Hz), 131.85, 131.46 (d,  $J = 11.4$  Hz), 130.54, 128.92, 128.68 (d,  $J = 12.9$  Hz), 127.30, 124.87, 121.98, 87.96 (d,  $J = 118.2$  Hz), 41.04;  $^{31}\text{P}$  NMR (162 MHz,  $\text{CDCl}_3$ ):  $\delta$  29.24; HRMS (ESI): calcd for  $\text{C}_{29}\text{H}_{23}\text{N}_2\text{O}_3\text{PBr}$  [ $\text{M} + \text{H}$ ] $^+$  557.0630, found 557.0631.

**3-(diphenylphosphoryl)-4-(phenylamino)-1-(4-(trifluoromethyl)benzyl)-1H-pyrrole-2,5-dione**

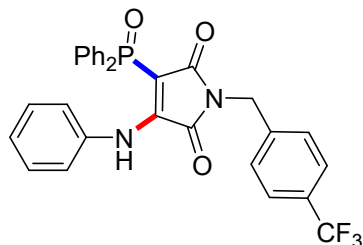

**4y**

Following the general procedure, using (petroleum ether : EtOAc = 9 : 1) as the eluant afforded a yellow liquid (76.4 mg, 70% yield).  $^1\text{H}$  NMR (400 MHz,  $\text{CDCl}_3$ ):  $\delta$  10.88 (s, 1H), 7.95-7.90 (m, 4H), 7.64-7.53 (m, 8H), 7.46-7.38 (m, 4H), 7.35-7.30 (m, 3H), 4.67 (s, 2H);  $^{13}\text{C}$  NMR (100 MHz,



CDCl<sub>3</sub>):  $\delta$  169.08 (d,  $J$  = 11.9 Hz), 163.68 (d,  $J$  = 13.1 Hz), 156.32, 140.08, 136.63, 132.50 (d,  $J$  = 3.0 Hz), 132.49 (d,  $J$  = 109.1 Hz), 131.44 (d,  $J$  = 11.3 Hz), 130.15 (d,  $J$  = 32.3 Hz), 128.96, 128.92, 128.68 (d,  $J$  = 12.9 Hz), 127.35, 125.74, 125.70, 124.87, 88.02 (d,  $J$  = 118.2 Hz), 41.14; **<sup>19</sup>F NMR** (375 MHz, CDCl<sub>3</sub>):  $\delta$  -62.59 (s, 3F); **<sup>31</sup>P NMR** (162 MHz, CDCl<sub>3</sub>):  $\delta$  29.20; **HRMS** (ESI): calcd for C<sub>30</sub>H<sub>23</sub>N<sub>2</sub>O<sub>3</sub>F<sub>3</sub>P [M + H]<sup>+</sup> 547.1398, found 547.1389.

**1-(3,4-dichlorobenzyl)-3-(diphenylphosphoryl)-4-(phenylamino)-1H-pyrrole-2,5-dione**

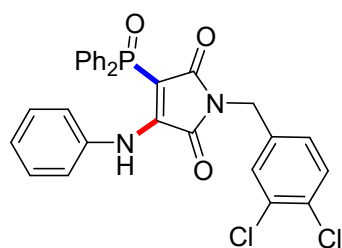

**4z**

Following the general procedure, using (petroleum ether : EtOAc = 9 : 1) as the eluant afforded a yellow liquid (79.7 mg, 73% yield). **<sup>1</sup>H NMR** (400 MHz, CDCl<sub>3</sub>):  $\delta$  10.87 (s, 1H), 7.94-7.88 (m, 4H), 7.64-7.60 (m, 2H), 7.57-7.52 (m, 4H), 7.43-7.36 (m, 4H), 7.34-7.29 (m, 3H), 7.19-7.16 (m, 1H), 4.55 (s, 2H); **<sup>13</sup>C NMR** (100 MHz, CDCl<sub>3</sub>):  $\delta$  169.04 (d,  $J$  = 11.8 Hz), 163.67, 156.32, 136.61, 136.35, 132.74, 132.52 (d,  $J$  = 2.9 Hz), 132.45 (d,  $J$  = 110.3 Hz), 132.14, 131.45 (d,  $J$  = 11.4 Hz), 130.70, 130.66, 128.94, 128.70 (d,  $J$  = 13.1 Hz), 128.15, 127.38, 124.88, 88.02 (d,  $J$  = 117.4 Hz), 40.54; **<sup>31</sup>P NMR** (162 MHz, CDCl<sub>3</sub>):  $\delta$  29.24; **HRMS** (ESI): calcd for C<sub>29</sub>H<sub>22</sub>N<sub>2</sub>O<sub>3</sub>PCl<sub>2</sub> [M + H]<sup>+</sup> 547.0745, found 547.0745.

**3-(diphenylphosphoryl)-1-(naphthalen-1-ylmethyl)-4-(phenylamino)-1H-pyrrole-2,5-dione**

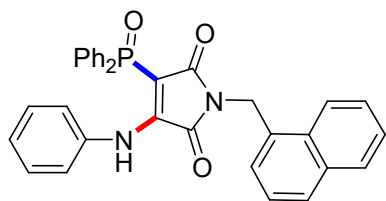

**4ab**

Following the general procedure, using (petroleum ether : EtOAc = 9 : 1) as the eluant afforded a yellow liquid (81.3 mg, 77% yield). **<sup>1</sup>H NMR** (400 MHz, CDCl<sub>3</sub>):  $\delta$  10.83 (s, 1H), 8.29-8.26 (m, 1H), 7.96-7.87 (m, 5H), 7.82 (d,  $J$  = 8.2 Hz, 1H), 7.64-7.59 (m, 2H), 7.56-7.51 (m, 7H), 7.45-7.41

(m, 1H), 7.39-7.35 (m, 2H), 7.31-7.28 (m, 3H), 5.11 (s, 2H);  $^{13}\text{C}$  NMR (100 MHz,  $\text{CDCl}_3$ ):  $\delta$  169.45 (d,  $J = 12.3$  Hz), 163.98 (d,  $J = 13.1$  Hz), 156.30, 136.74, 133.82, 132.60 (d,  $J = 109.1$  Hz), 132.45 (d,  $J = 2.9$  Hz), 131.52 (d,  $J = 11.5$  Hz), 131.39, 131.28, 128.88, 128.80, 128.74, 128.65 (d,  $J = 13.0$  Hz), 127.94, 127.17, 126.49, 125.87, 125.38, 124.78, 123.61, 88.13 (d,  $J = 118.4$  Hz), 39.75;  $^{31}\text{P}$  NMR (162 MHz,  $\text{CDCl}_3$ ):  $\delta$  29.40; HRMS (ESI): calcd for  $\text{C}_{33}\text{H}_{26}\text{N}_2\text{O}_3\text{P}$   $[\text{M} + \text{H}]^+$  529.1681, found 529.1678.

### 3-(diphenylphosphoryl)-4-(phenylamino)-1-(thiophen-2-ylmethyl)-1H-pyrrole-2,5-dione

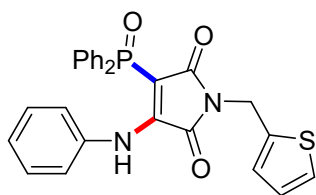

**4ac**

Following the general procedure, using (petroleum ether : EtOAc = 9 : 1) as the eluant afforded a yellow liquid (58.1 mg, 60% yield).  $^1\text{H}$  NMR (400 MHz,  $\text{CDCl}_3$ ):  $\delta$  10.86 (s, 1H), 7.97-7.91 (m, 4H), 7.64-7.59 (m, 2H), 7.57-7.52 (m, 4H), 7.42-7.38 (m, 2H), 7.34-7.30 (m, 3H), 7.25-7.23 (m, 1H), 7.06-7.05 (m, 1H), 6.95-6.93 (m, 1H), 4.81 (s, 2H);  $^{13}\text{C}$  NMR (100 MHz,  $\text{CDCl}_3$ ):  $\delta$  168.86 (d,  $J = 11.9$  Hz), 163.32 (d,  $J = 12.8$  Hz), 156.43, 138.13, 136.73, 132.61 (d,  $J = 109.1$  Hz), 132.43 (d,  $J = 2.9$  Hz), 131.49 (d,  $J = 11.2$  Hz), 128.90, 128.65 (d,  $J = 13.0$  Hz), 127.72, 127.22, 126.91, 126.01, 124.80, 88.08 (d,  $J = 117.9$  Hz), 35.77;  $^{31}\text{P}$  NMR (162 MHz,  $\text{CDCl}_3$ ):  $\delta$  29.32; HRMS (ESI): calcd for  $\text{C}_{27}\text{H}_{22}\text{N}_2\text{O}_3\text{PS}$   $[\text{M} + \text{H}]^+$  485.1089, found 485.1087.

### 3-(di-p-tolylphosphoryl)-1-phenyl-4-(phenylamino)-1H-pyrrole-2,5-dione

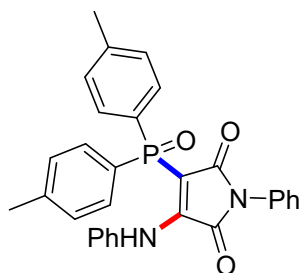

**4ad**

Following the general procedure, using (petroleum ether : EtOAc = 9 : 1) as the eluant afforded a

yellow liquid (72.8 mg, 74% yield). **<sup>1</sup>H NMR** (400 MHz, CDCl<sub>3</sub>): δ 10.96 (s, 1H), 7.87 (dd, *J* = 13.0, 7.8 Hz, 4H), 7.44-7.30 (m, 14H), 2.46 (s, 6H); **<sup>13</sup>C NMR** (100 MHz, CDCl<sub>3</sub>): δ 168.55 (d, *J* = 11.9 Hz), 163.01 (d, *J* = 12.5 Hz), 155.68, 143.07, 143.05, 136.87, 131.60 (d, *J* = 11.6 Hz), 130.67 (d, *J* = 147.9 Hz), 129.44 (d, *J* = 13.3 Hz), 128.90, 128.82, 127.70, 127.21, 126.17, 124.98, 88.83 (d, *J* = 117.5 Hz), 21.80; **<sup>31</sup>P NMR** (162 MHz, CDCl<sub>3</sub>): δ 29.51; **HRMS** (ESI): calcd for C<sub>30</sub>H<sub>26</sub>N<sub>2</sub>O<sub>3</sub>P [M + H]<sup>+</sup> 493.1681, found 493.1683.

**3-(bis(4-methoxyphenyl)phosphoryl)-1-phenyl-4-(phenylamino)-1H-pyrrole-2,5-dione**

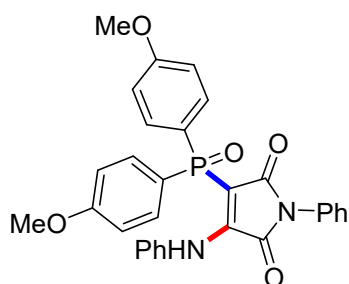

**4ae**

Following the general procedure, using (petroleum ether : EtOAc = 9 : 1) as the eluant afforded a yellow liquid (79.7 mg, 76% yield). **<sup>1</sup>H NMR** (400 MHz, CDCl<sub>3</sub>): δ 10.95 (s, 1H), 7.90 (t, *J* = 8.7 Hz, 4H), 7.44-7.29 (m, 10H), 7.05 (d, *J* = 8.1 Hz, 4H), 3.90 (s, 6H); **<sup>13</sup>C NMR** (100 MHz, CDCl<sub>3</sub>): δ 168.65 (d, *J* = 12.0 Hz), 163.07 (d, *J* = 12.4 Hz), 162.90, 162.87, 155.42, 136.92, 133.53 (d, *J* = 12.8 Hz), 131.43, 128.89, 127.41 (d, *J* = 53.5 Hz), 125.55 (d, *J* = 123.5 Hz), 124.57, 123.40, 114.31, 114.17, 89.28 (d, *J* = 117.8 Hz), 55.46; **<sup>31</sup>P NMR** (162 MHz, CDCl<sub>3</sub>): δ 28.93; **HRMS** (ESI): calcd for C<sub>30</sub>H<sub>26</sub>N<sub>2</sub>O<sub>5</sub>P [M + H]<sup>+</sup> 525.1579, found 525.1577.

**3-(bis(2-methoxyphenyl)phosphoryl)-1-phenyl-4-(phenylamino)-1H-pyrrole-2,5-dione**

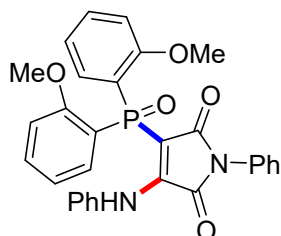

**4af**

Following the general procedure, using (petroleum ether : EtOAc = 9 : 1) as the eluant afforded a

yellow solid (63.9 mg, 61% yield), Mp = 106-107°C. **<sup>1</sup>H NMR** (400 MHz, CDCl<sub>3</sub>): δ 10.81 (s, 1H), 7.59-7.53 (m, 4H), 7.42-7.35 (m, 8H), 7.31-7.26 (m, 2H), 7.08-7.03 (m, 4H), 3.86 (s, 6H); **<sup>13</sup>C NMR** (100 MHz, CDCl<sub>3</sub>): δ 167.42 (d, *J* = 11.1 Hz), 163.35 (d, *J* = 13.2 Hz), 162.06 (d, *J* = 2.3 Hz), 155.26 (d, *J* = 3.9 Hz), 137.37, 134.39 (d, *J* = 2.1 Hz), 133.73 (d, *J* = 10.2 Hz), 131.73, 128.81, 127.05 (d, *J* = 77.7 Hz), 125.29 (d, *J* = 156.8 Hz), 120.79, 120.66, 120.33, 119.18, 111.43, 111.36, 90.50 (d, *J* = 123.7 Hz), 55.84; **<sup>31</sup>P NMR** (162 MHz, CDCl<sub>3</sub>): δ 26.92; **HRMS** (ESI): calcd for C<sub>30</sub>H<sub>26</sub>N<sub>2</sub>O<sub>5</sub>P [M + H]<sup>+</sup> 525.1579, found 525.1578.

### 3-(bis(3,5-dimethylphenyl)phosphoryl)-1-phenyl-4-(phenylamino)-1H-pyrrole-2,5-dione

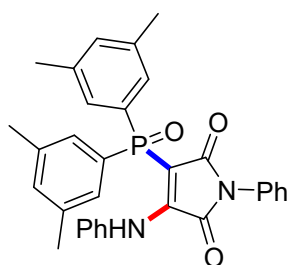

**4ag**

Following the general procedure, using (petroleum ether : EtOAc = 9 : 1) as the eluant afforded a yellow liquid (45.8 mg, 44% yield). **<sup>1</sup>H NMR** (400 MHz, CDCl<sub>3</sub>): δ 11.01 (s, 1H), 7.62 (d, *J* = 1.7 Hz, 2H), 7.58 (d, *J* = 1.6 Hz, 2H), 7.46-7.30 (m, 10H), 7.25 (s, 2H), 2.42 (s, 12H); **<sup>13</sup>C NMR** (100 MHz, CDCl<sub>3</sub>): δ 168.31 (d, *J* = 11.9 Hz), 162.98 (d, *J* = 12.8 Hz), 155.65, 138.40, 138.26, 136.86, 134.28 (d, *J* = 109.1 Hz), 134.20 (d, *J* = 2.9 Hz), 128.99, 128.88, 128.82 (d, *J* = 4.9 Hz), 127.59, 127.07, 126.08, 124.91, 88.73 (d, *J* = 116.0 Hz), 21.43; **<sup>31</sup>P NMR** (162 MHz, CDCl<sub>3</sub>): δ 30.03; **HRMS** (ESI): calcd for C<sub>32</sub>H<sub>30</sub>N<sub>2</sub>O<sub>3</sub>P [M + H]<sup>+</sup> 521.1994, found 521.1993.

### 3-(bis(4-chlorophenyl)phosphoryl)-1-phenyl-4-(phenylamino)-1H-pyrrole-2,5-dione

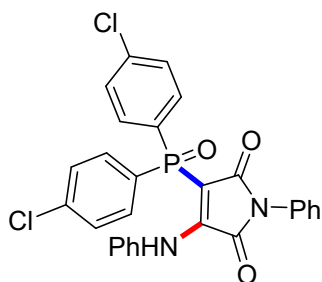

**4ah**

Following the general procedure, using (petroleum ether : EtOAc = 9 : 1) as the eluant afforded a yellow solid (77.7 mg, 73% yield), Mp = 87-88°C. **<sup>1</sup>H NMR** (400 MHz, CDCl<sub>3</sub>): δ 10.85 (s, 1H), 7.95-7.90 (m, 4H), 7.56-7.53 (m, 4H), 7.46-7.32 (m, 10H); **<sup>13</sup>C NMR** (100 MHz, CDCl<sub>3</sub>): δ 168.58 (d, *J* = 13.7 Hz), 162.61 (d, *J* = 12.5 Hz), 156.04, 139.35, 136.50, 132.91 (d, *J* = 11.9 Hz), 131.27, 130.66 (d, *J* = 100.9 Hz), 129.18 (d, *J* = 13.8 Hz), 129.00, 127.95, 127.59, 126.14, 125.06, 87.19 (d, *J* = 120.5 Hz); **<sup>31</sup>P NMR** (162 MHz, CDCl<sub>3</sub>): δ 27.92; **HRMS** (ESI): calcd for C<sub>28</sub>H<sub>20</sub>N<sub>2</sub>O<sub>3</sub>PCl<sub>2</sub> [M + H]<sup>+</sup> 533.0589, found 533.0585.

### 3-((4-acetylphenyl)amino)-4-(di-p-tolylphosphoryl)-1-phenyl-1H-pyrrole-2,5-dione

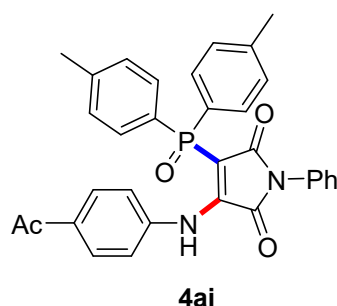

Following the general procedure, using (petroleum ether : EtOAc = 9 : 1) as the eluant afforded a yellow liquid (74.8 mg, 70% yield). **<sup>1</sup>H NMR** (400 MHz, CDCl<sub>3</sub>): δ 11.16 (s, 1H), 7.99-7.97 (m, 2H), 7.89-7.84 (m, 4H), 7.48-7.41 (m, 4H), 7.38-7.33 (m, 7H), 2.61 (s, 3H), 2.46 (s, 6H); **<sup>13</sup>C NMR** (100 MHz, CDCl<sub>3</sub>): δ 168.29 (d, *J* = 11.4 Hz), 163.08 (d, *J* = 12.5 Hz), 155.03, 143.30, 143.27, 141.11, 135.00, 131.61 (d, *J* = 11.6 Hz), 131.25, 129.50 (d, *J* = 13.5 Hz), 129.22, 128.43 (d, *J* = 110.3 Hz), 128.31, 126.14, 124.09, 91.72 (d, *J* = 114.7 Hz), 26.64, 21.79; **<sup>31</sup>P NMR** (162 MHz, CDCl<sub>3</sub>): δ 29.63; **HRMS** (ESI): calcd for C<sub>32</sub>H<sub>28</sub>N<sub>2</sub>O<sub>4</sub>P [M + H]<sup>+</sup> 535.1787, found 535.1786.

### 3-(butyl(phenyl)phosphoryl)-1-phenyl-4-(phenylamino)-1H-pyrrole-2,5-dione

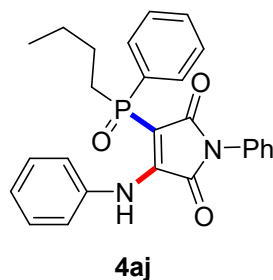

Following the general procedure, using (petroleum ether : EtOAc = 9 : 1) as the eluant afforded a

yellow liquid (70.2 mg, 79% yield). **<sup>1</sup>H NMR** (400 MHz, CDCl<sub>3</sub>): δ 10.61 (s, 1H), 8.09-8.04 (m, 2H), 7.63-7.54 (m, 3H), 7.47-7.43 (m, 2H), 7.41-7.28 (m, 8H), 2.58-2.47 (m, 1H), 2.42-2.32 (m, 1H), 1.78-1.60 (m, 2H), 1.57-1.49 (m, 2H), 0.98 (t, *J* = 7.3 Hz, 3H); **<sup>13</sup>C NMR** (100 MHz, CDCl<sub>3</sub>): δ 168.84 (d, *J* = 12.5 Hz), 163.02 (d, *J* = 11.9 Hz), 155.13, 136.78, 133.03 (d, *J* = 102.8 Hz), 132.10 (d, *J* = 2.9 Hz), 131.37, 130.45 (d, *J* = 10.4 Hz), 128.94 (d, *J* = 9.0 Hz), 128.78, 127.47 (d, *J* = 67.7 Hz), 126.19, 124.81, 89.36 (d, *J* = 109.1 Hz), 30.94 (d, *J* = 73.4 Hz), 23.96 (d, *J* = 15.8 Hz), 23.17 (d, *J* = 4.4 Hz), 13.74; **<sup>31</sup>P NMR** (162 MHz, CDCl<sub>3</sub>): δ 36.08; **HRMS** (ESI): calcd for C<sub>26</sub>H<sub>26</sub>N<sub>2</sub>O<sub>3</sub>P [M + H]<sup>+</sup> 445.1681, found 445.1683.

**3-((4-((4-aminophenyl)sulfonyl)phenyl)amino)-4-(diphenylphosphoryl)-1-phenyl-1H-pyrrole-2,5-dione**

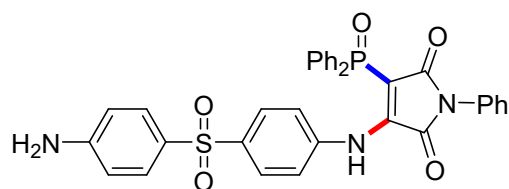

**5a**

Following the general procedure, using (petroleum ether : EtOAc = 9 : 1) as the eluant afforded a yellow solid (87.9 mg, 71% yield), Mp = 95-96°C. **<sup>1</sup>H NMR** (400 MHz, CDCl<sub>3</sub>): δ 11.14 (s, 1H), 7.99-7.93 (m, 4H), 7.89-7.87 (m, 2H), 7.73-7.70 (m, 2H), 7.65-7.60 (m, 2H), 7.57-7.52 (m, 4H), 7.46-7.42 (m, 4H), 7.37-7.31 (m, 3H), 6.67 (d, *J* = 8.7 Hz, 2H), 4.20 (s, 2H); **<sup>13</sup>C NMR** (100 MHz, CDCl<sub>3</sub>): δ 168.14 (d, *J* = 11.6 Hz), 162.98 (d, *J* = 12.6 Hz), 155.12, 151.33, 140.63, 140.47, 132.74, 131.76 (d, *J* = 110.2 Hz), 131.54 (d, *J* = 11.3 Hz), 131.05, 129.94, 129.07, 129.01, 128.80 (d, *J* = 13.0 Hz), 128.06, 128.00, 126.19, 124.42, 114.28, 91.62 (d, *J* = 114.8 Hz); **<sup>31</sup>P NMR** (162 MHz, CDCl<sub>3</sub>): δ 29.38; **HRMS** (ESI): calcd for C<sub>34</sub>H<sub>27</sub>N<sub>3</sub>O<sub>5</sub>PS [M + H]<sup>+</sup> 620.1409, found 620.1408.

**4-((4-(diphenylphosphoryl)-2,5-dioxo-1-phenyl-2,5-dihydro-1H-pyrrol-3-yl)amino)benzenesulfonamide**

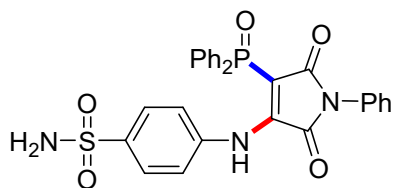

**5b**

Following the general procedure, using (petroleum ether : EtOAc = 9 : 1) as the eluant afforded a yellow solid (79.3 mg, 73% yield), Mp = 209-210°C. **<sup>1</sup>H NMR** (400 MHz, CDCl<sub>3</sub>): δ 11.12 (s, 1H), 8.01-7.90 (m, 6H), 7.66-7.62 (m, 2H), 7.59-7.54 (m, 4H), 7.51-7.43 (m, 4H), 7.38-7.33 (m, 3H), 4.96 (s, 2H); **<sup>13</sup>C NMR** (100 MHz, CDCl<sub>3</sub>): δ 169.37 (d, *J* = 11.9 Hz), 163.78 (d, *J* = 12.8 Hz), 156.46, 137.60, 136.80, 133.40, 132.67 (d, *J* = 109.3 Hz), 132.40 (d, *J* = 3.2 Hz), 131.49 (d, *J* = 11.2 Hz), 129.38, 128.81 (d, *J* = 13.7 Hz), 128.71, 128.58, 127.17, 124.85, 87.95 (d, *J* = 118.6 Hz); **<sup>31</sup>P NMR** (162 MHz, CDCl<sub>3</sub>): δ 29.48; **HRMS** (ESI): calcd for C<sub>28</sub>H<sub>23</sub>N<sub>3</sub>O<sub>5</sub>PS [M + H]<sup>+</sup> 544.1096, found 544.1094.

**4-((4-(diphenylphosphoryl)-2,5-dioxo-1-phenyl-2,5-dihydro-1H-pyrrol-3-yl)amino)-N-(5-methylisoxazol-3-yl)benzenesulfonamide**

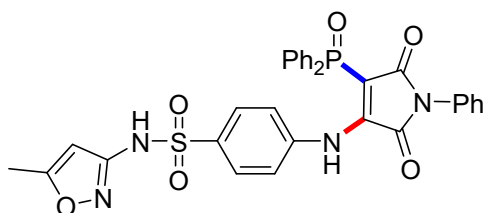

**5c**

Following the general procedure, using (petroleum ether : EtOAc = 9 : 1) as the eluant afforded a yellow liquid (68.6 mg, 55% yield). **<sup>1</sup>H NMR** (400 MHz, CDCl<sub>3</sub>): δ 10.95 (s, 1H), 9.87 (brs, 1H), 8.01-7.92 (m, 3H), 7.89-7.83 (m, 1H), 7.76 (d, *J* = 8.4 Hz, 2H), 7.65-7.60 (m, 2H), 7.57-7.52 (m, 4H), 7.47-7.32 (m, 7H), 6.19 (s, 1H), 2.34 (s, 3H); **<sup>13</sup>C NMR** (100 MHz, CDCl<sub>3</sub>): δ 170.83, 168.09, 162.95 (d, *J* = 13.0 Hz), 154.90, 141.16, 136.81, 132.84, 131.82, 131.64 (d, *J* = 11.6 Hz), 131.43 (d, *J* = 111.2 Hz), 131.03, 129.08, 128.85 (d, *J* = 13.2 Hz), 128.10, 127.80, 126.18, 124.47, 95.67, 91.92 (d, *J* = 115.4 Hz), 12.73; **<sup>31</sup>P NMR** (162 MHz, CDCl<sub>3</sub>): δ 29.93; **HRMS** (ESI): calcd for C<sub>32</sub>H<sub>26</sub>N<sub>4</sub>O<sub>6</sub>PS [M + H]<sup>+</sup> 625.1311, found 625.1306.

**4-((4-(diphenylphosphoryl)-2,5-dioxo-1-phenyl-2,5-dihydro-1H-pyrrol-3-yl)amino)-N-(pyridin-2-yl)benzenesulfonamide**

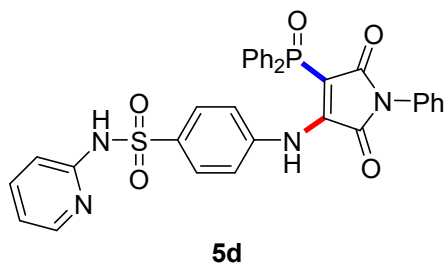

Following the general procedure, using (petroleum ether : EtOAc = 9 : 1) as the eluant afforded a yellow solid (63.2 mg, 51% yield), Mp = 198-199°C. **<sup>1</sup>H NMR** (400 MHz, DMSO-*d*<sub>6</sub>): δ 12.10 (brs, 1H), 10.76 (s, 1H), 8.05 (dd, *J* = 5.6, 1.9 Hz, 1H), 7.79-7.71 (m, 7H), 7.55-7.41 (m, 10H), 7.39-7.36 (m, 3H), 7.24 (d, *J* = 8.7 Hz, 1H), 6.90 (t, *J* = 6.4 Hz, 1H); **<sup>13</sup>C NMR** (400 MHz, DMSO-*d*<sub>6</sub>): δ 169.37 (d, *J* = 11.4 Hz), 164.21 (d, *J* = 12.7 Hz), 154.79, 153.78, 141.76, 141.10, 133.62 (d, *J* = 109.4 Hz), 132.29, 132.17, 131.44 (d, *J* = 10.6 Hz), 129.21, 128.92 (d, *J* = 12.5 Hz), 128.18, 127.53, 127.36, 124.07, 114.40, 91.44, 90.27, 52.24, 44.61 (d, *J* = 39.0 Hz); **<sup>31</sup>P NMR** (162 MHz, CDCl<sub>3</sub>): δ 31.12; **HRMS** (ESI): calcd for C<sub>33</sub>H<sub>26</sub>N<sub>4</sub>O<sub>5</sub>PS [M + H]<sup>+</sup> 621.1362, found 621.1360.

**4-((4-(diphenylphosphoryl)-2,5-dioxo-1-phenyl-2,5-dihydro-1H-pyrrol-3-yl)amino)-5-methoxy-N,2-dimethylbenzenesulfonamide**

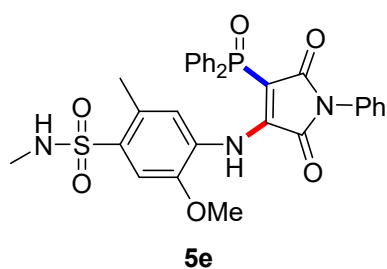

Following the general procedure, using (petroleum ether : EtOAc = 9 : 1) as the eluant afforded a yellow solid (82.9 mg, 69% yield), Mp = 128-129°C. **<sup>1</sup>H NMR** (400 MHz, CDCl<sub>3</sub>): δ 10.67 (s, 1H), 8.00-7.94 (m, 4H), 7.64-7.59 (m, 2H), 7.57-7.52 (m, 5H), 7.45-7.41 (m, 2H), 7.35-7.32 (m, 4H), 7.26-7.22 (m, 1H), 3.91 (s, 3H), 2.62 (d, *J* = 5.2 Hz, 3H), 2.53 (s, 3H); **<sup>13</sup>C NMR** (100 MHz, CDCl<sub>3</sub>): δ 168.35 (d, *J* = 12.0 Hz), 163.12 (d, *J* = 12.9 Hz), 156.00, 150.61, 135.13, 132.56 (d, *J* = 2.9 Hz), 132.14 (d, *J* = 109.3 Hz), 131.57 (d, *J* = 11.2 Hz), 131.26, 129.65, 129.17, 129.04, 128.71,



128.71 (d,  $J = 12.9$  Hz), 127.92, 126.17, 112.80, 90.36 (d,  $J = 116.0$  Hz), 56.39, 29.05, 19.47;  **$^{31}\text{P}$**   
**NMR** (162 MHz,  $\text{CDCl}_3$ ):  $\delta$  28.84; **HRMS** (ESI): calcd for  $\text{C}_{31}\text{H}_{29}\text{N}_3\text{O}_6\text{PS}$   $[\text{M} + \text{H}]^+$  602.1515,  
found 602.1515.

## References:

- (1) (a) Ding, G.; Li, C.; Shen, Y.; Lu, B.; Zhang, Z.; Xie, X. *Adv. Synth. Catal.* **2016**, 358, 1241-1250. (b) Matuszak, N.; Muccioli, G. G.; Labar, G.; Lambert, D. M. *J. Med Chem.* **2009**, 52, 7410-7420.

## **$^1\text{H}$ , $^{13}\text{C}$ and $^{19}\text{F}$ NMR spectra of products**

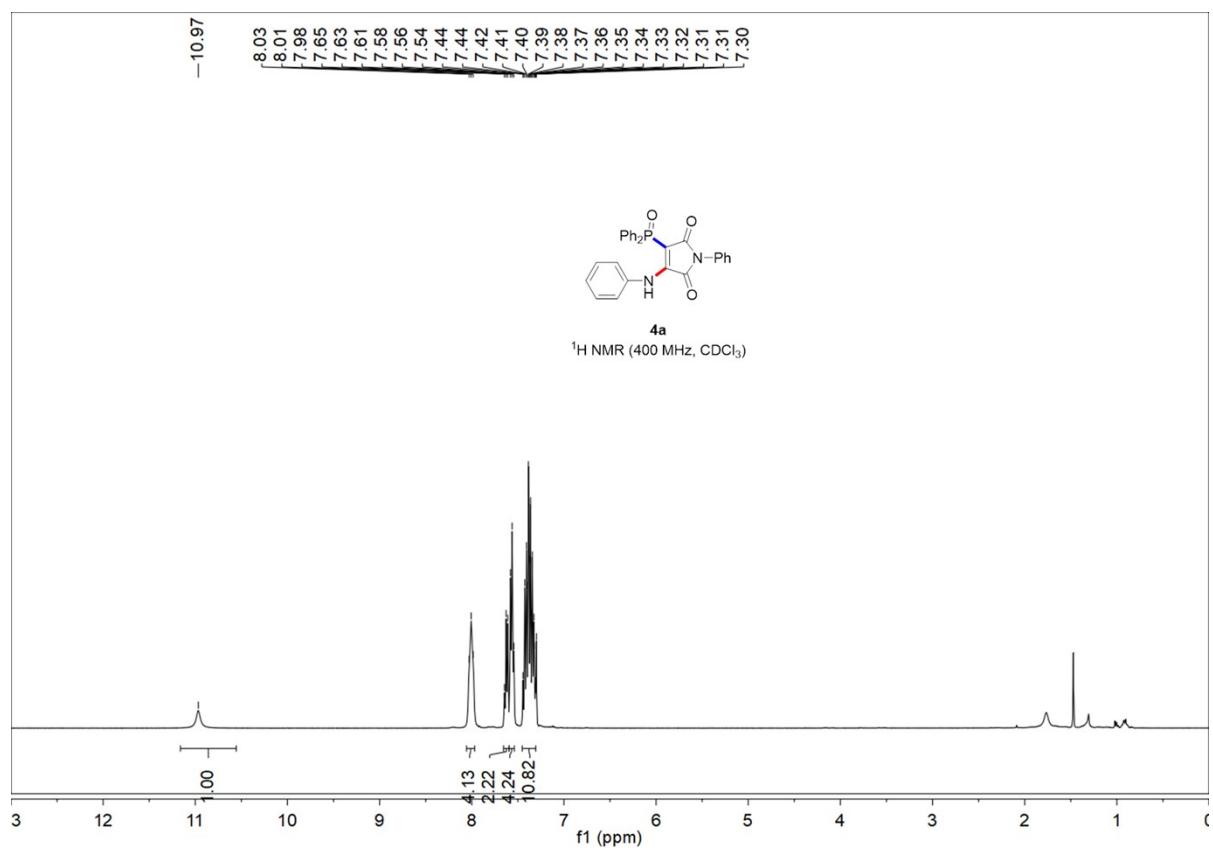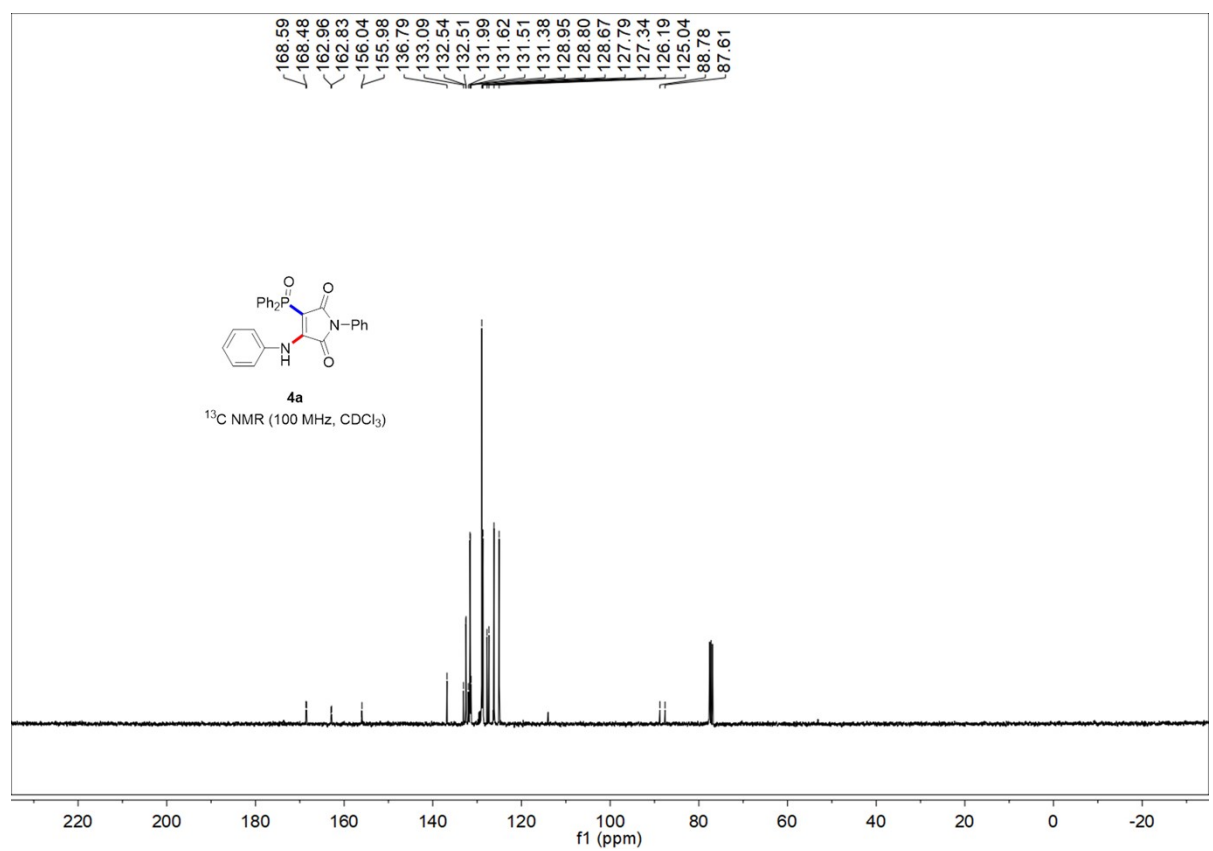



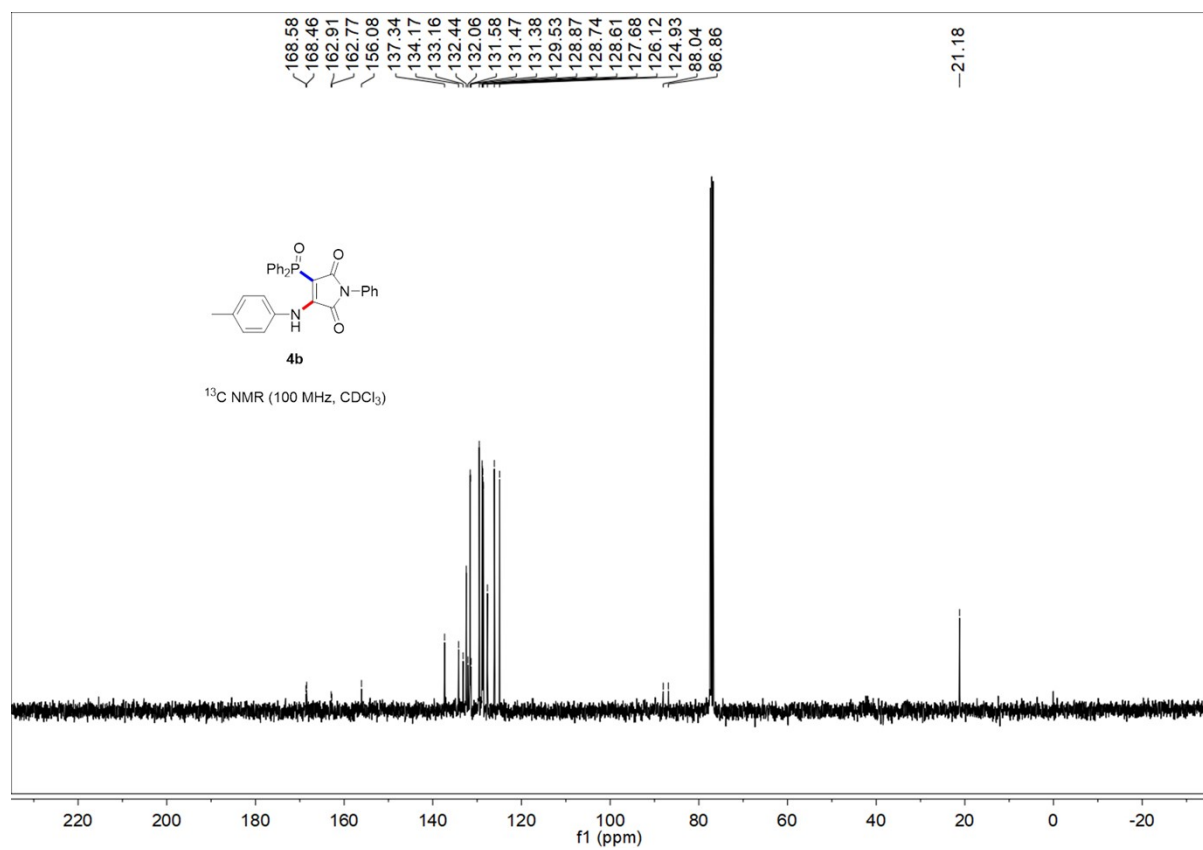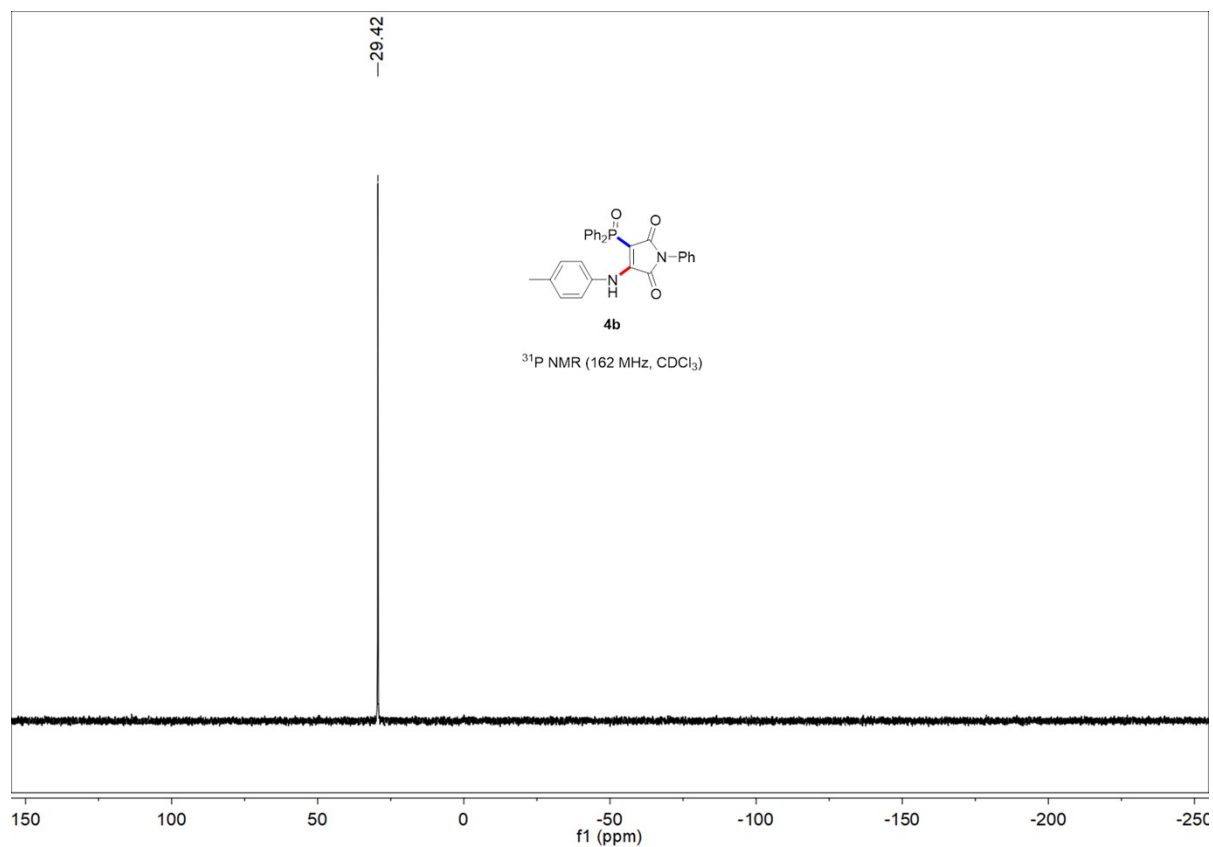

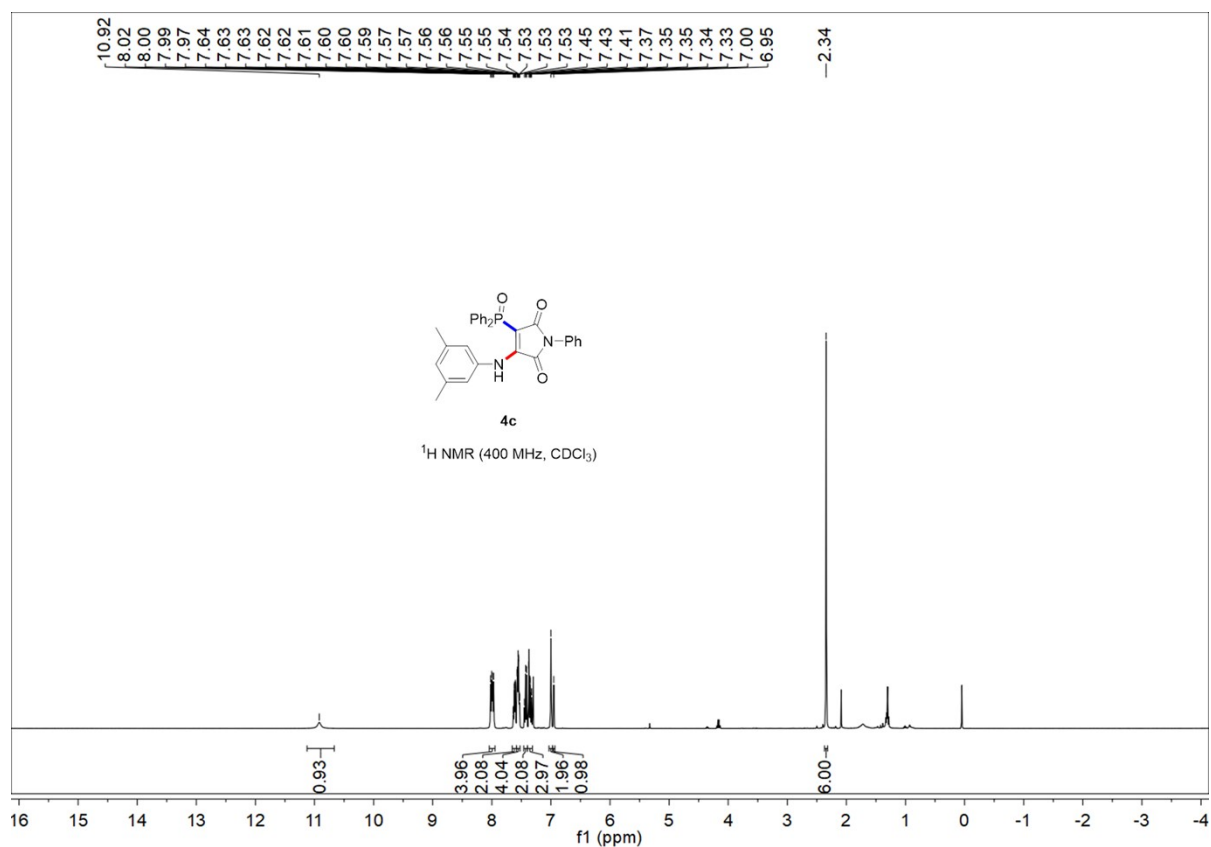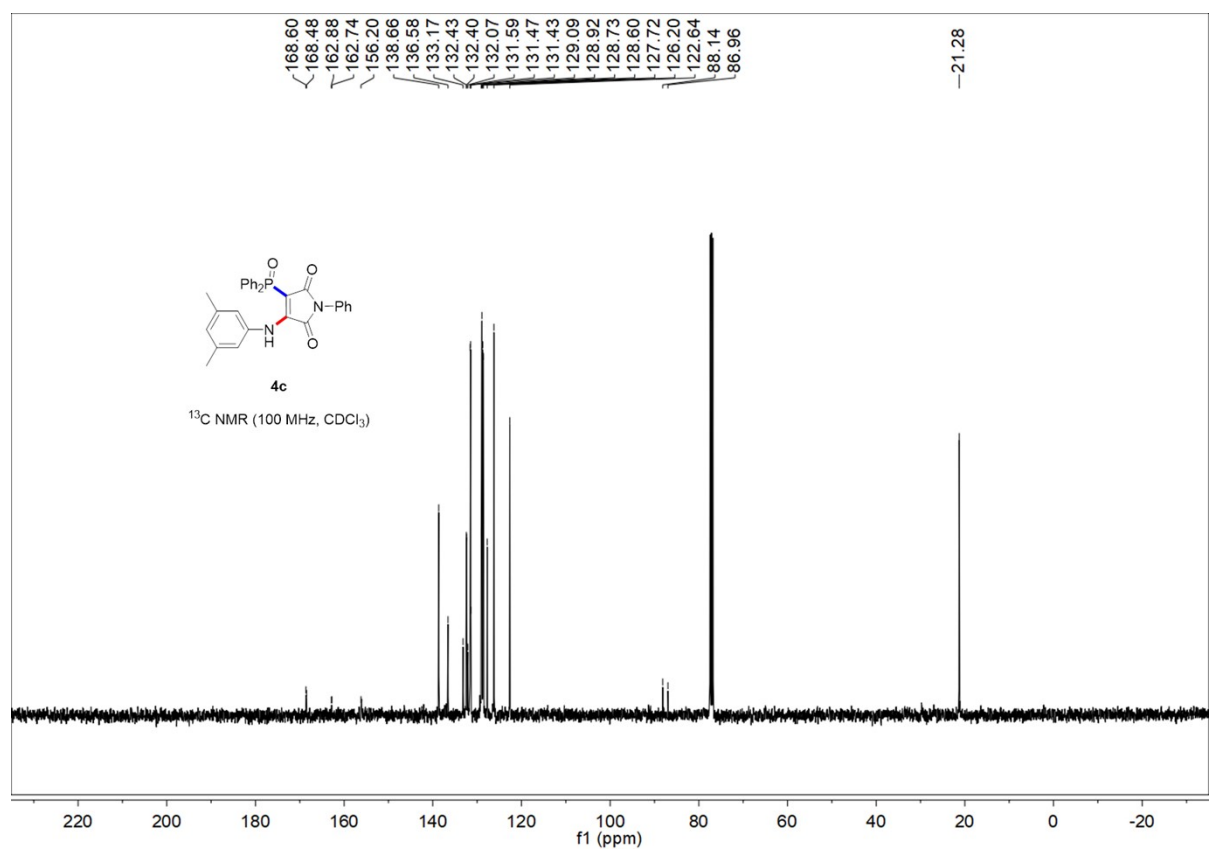

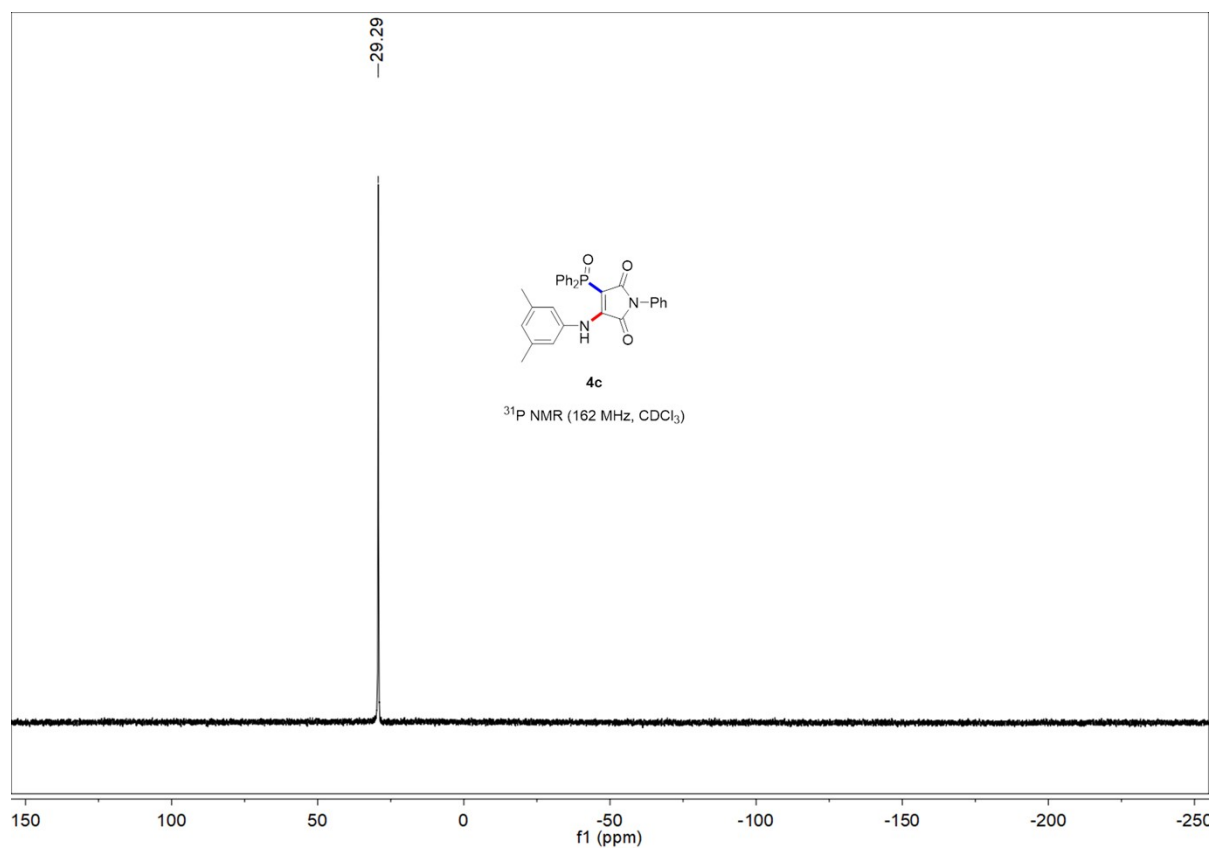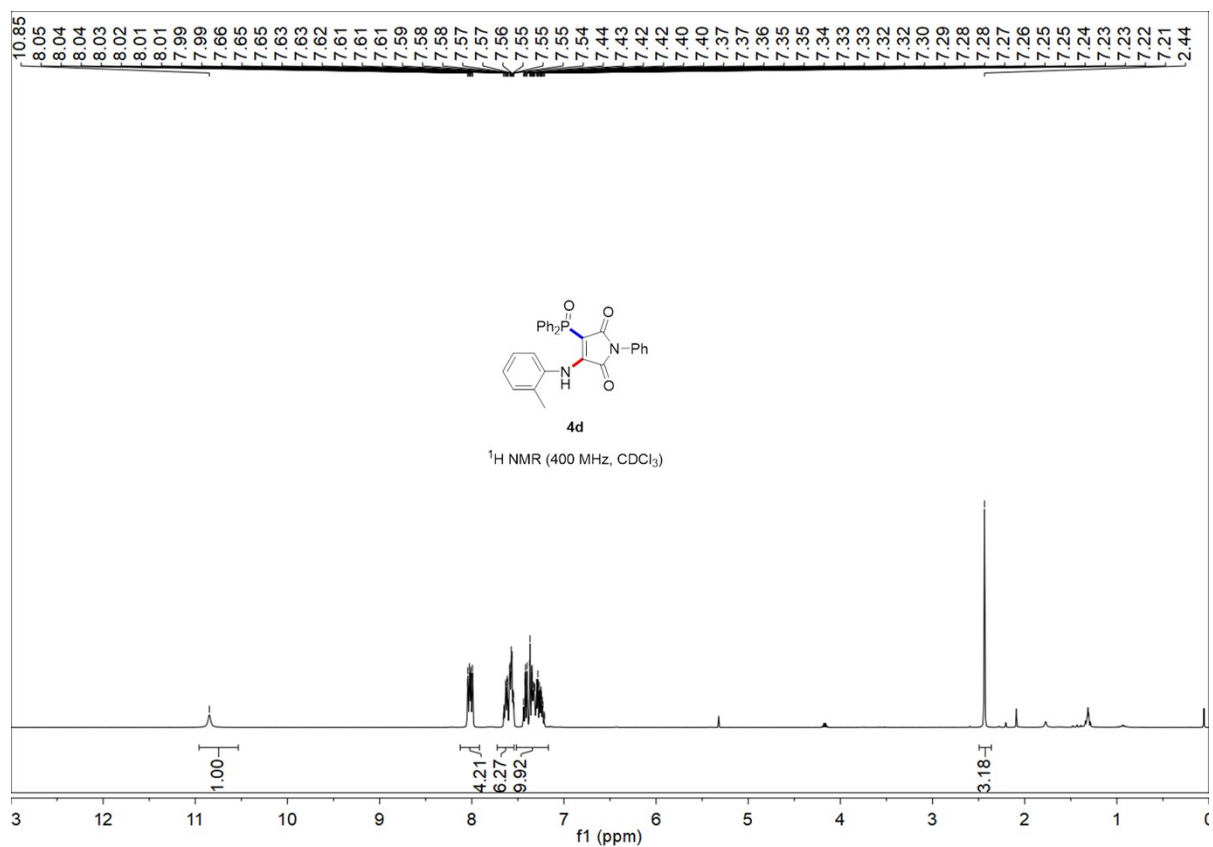

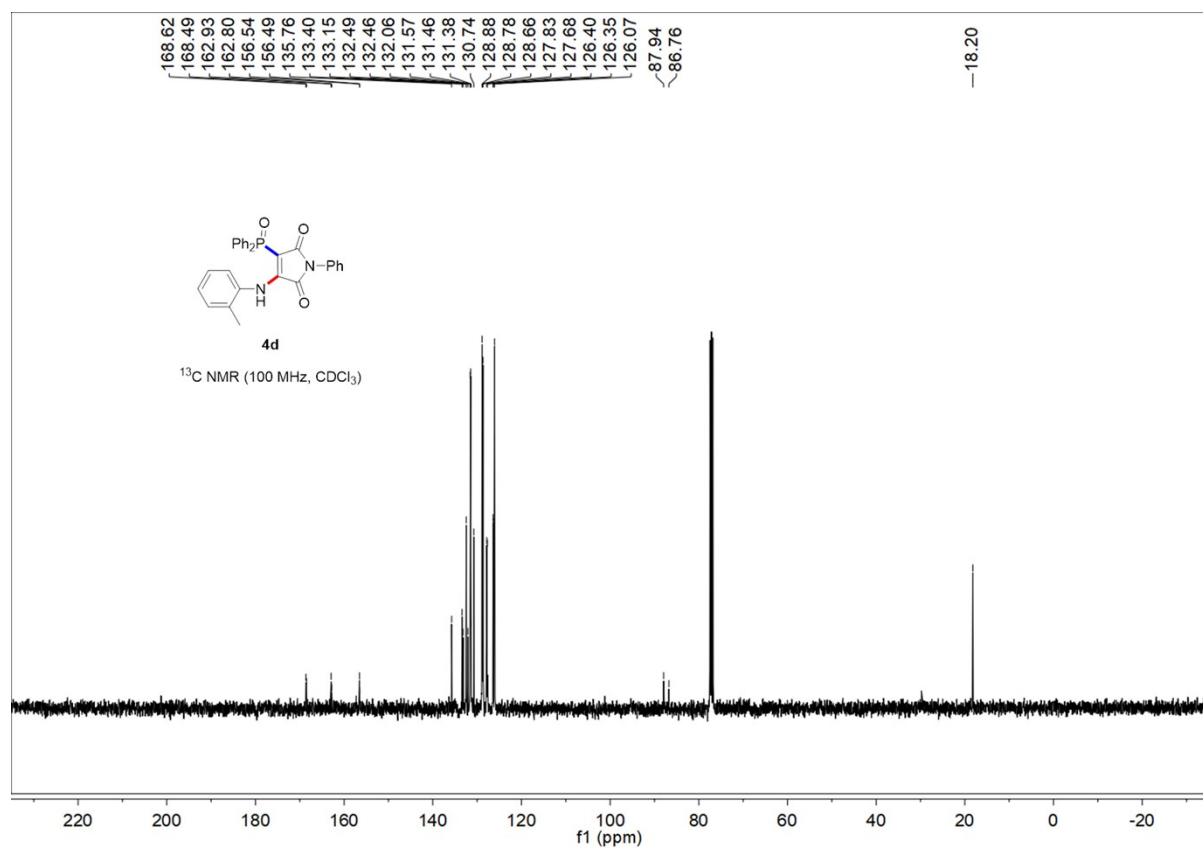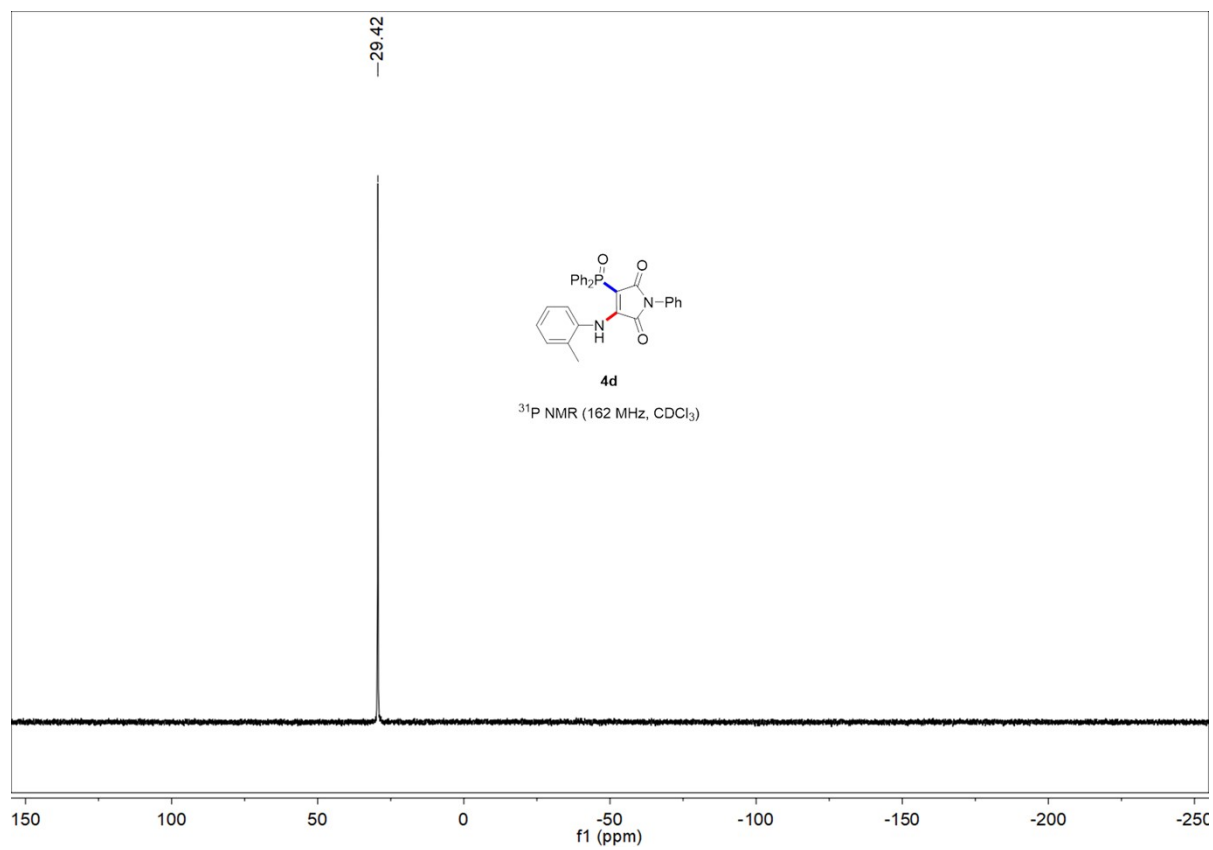



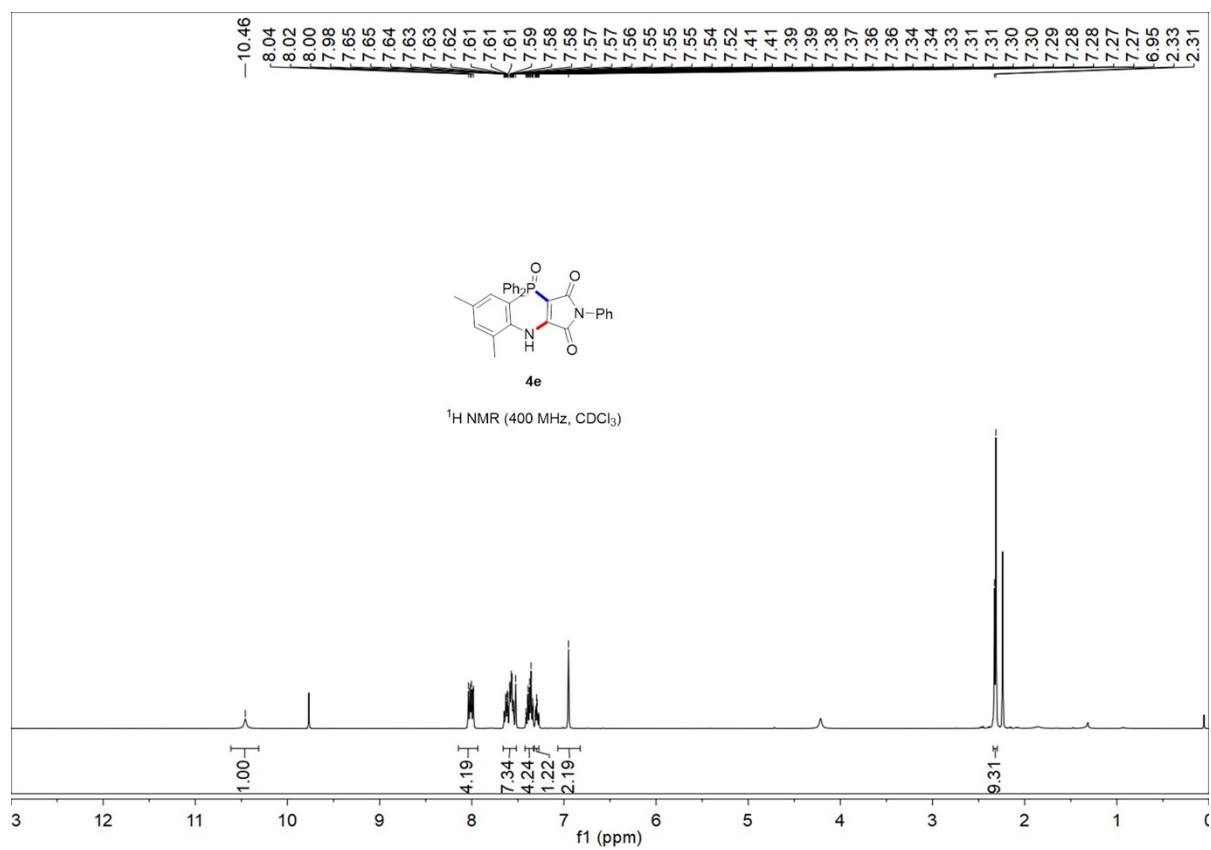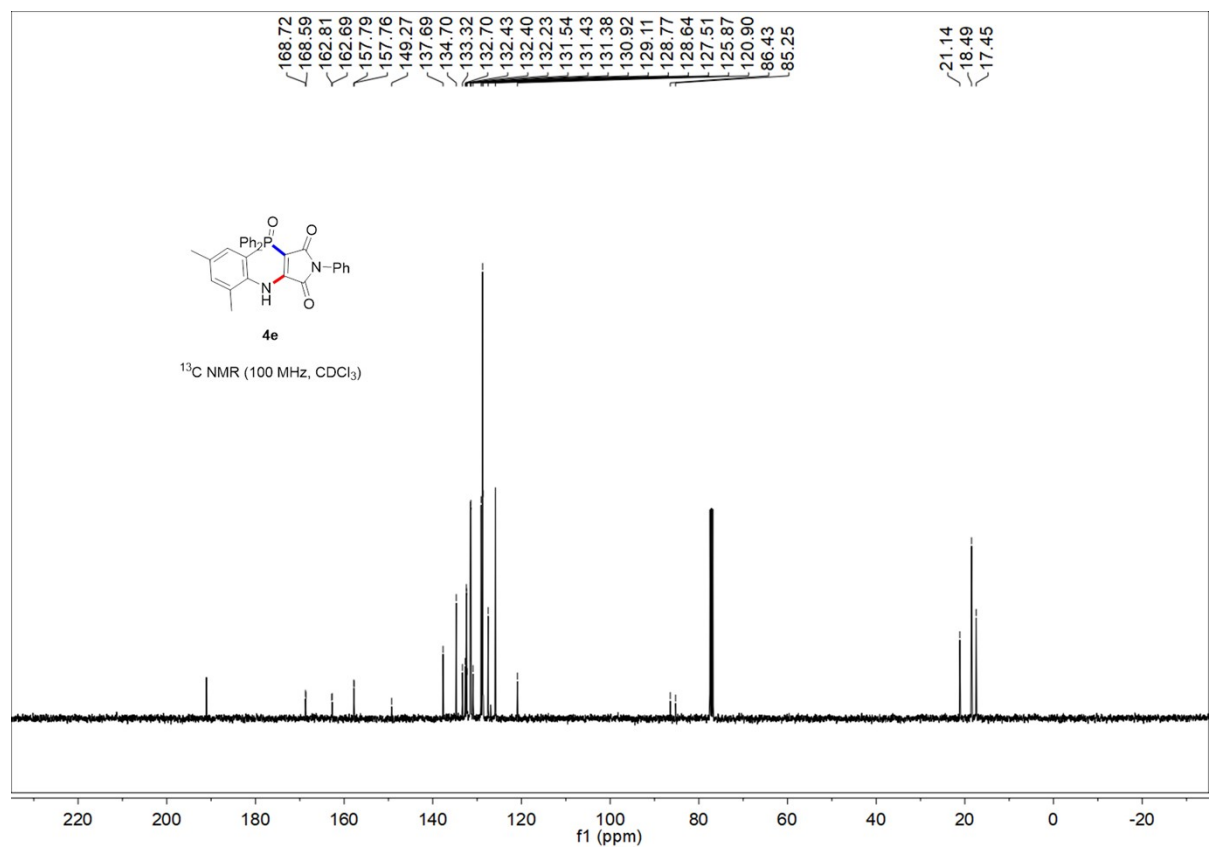

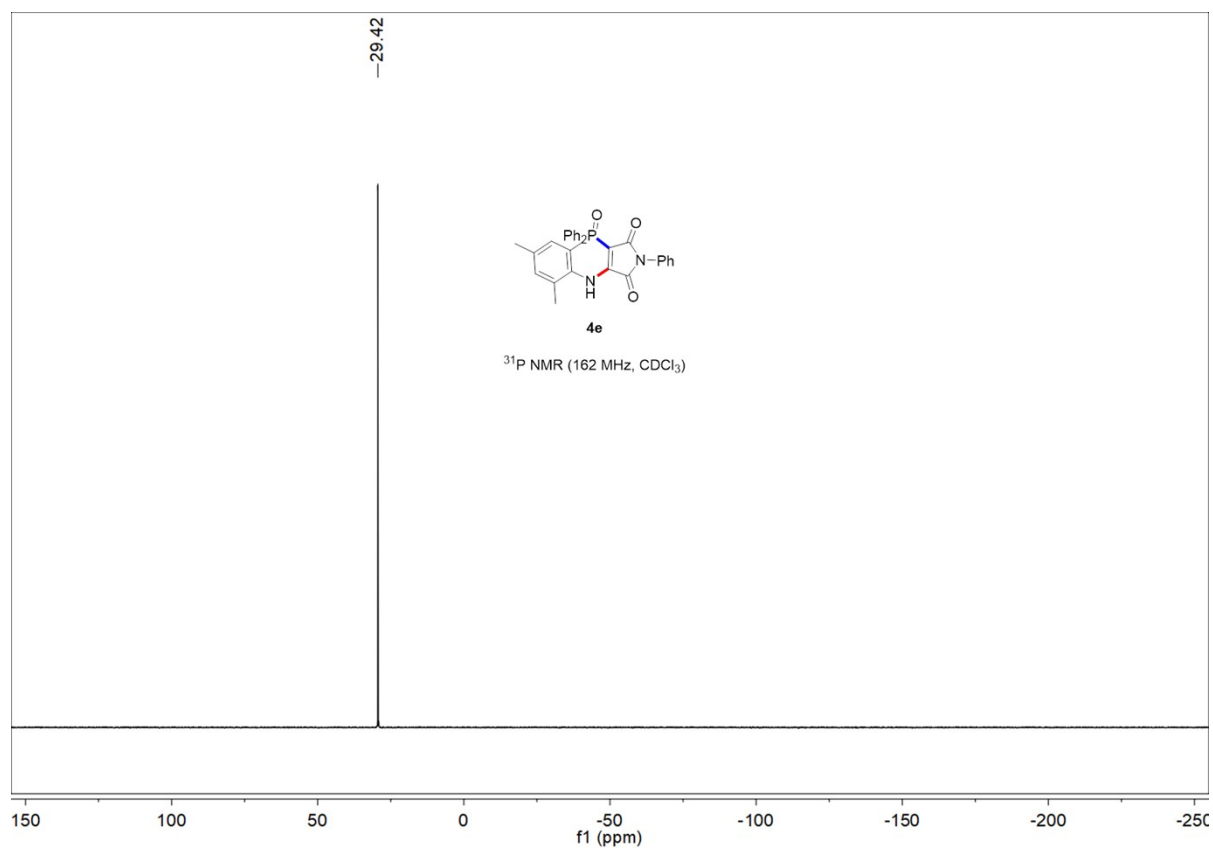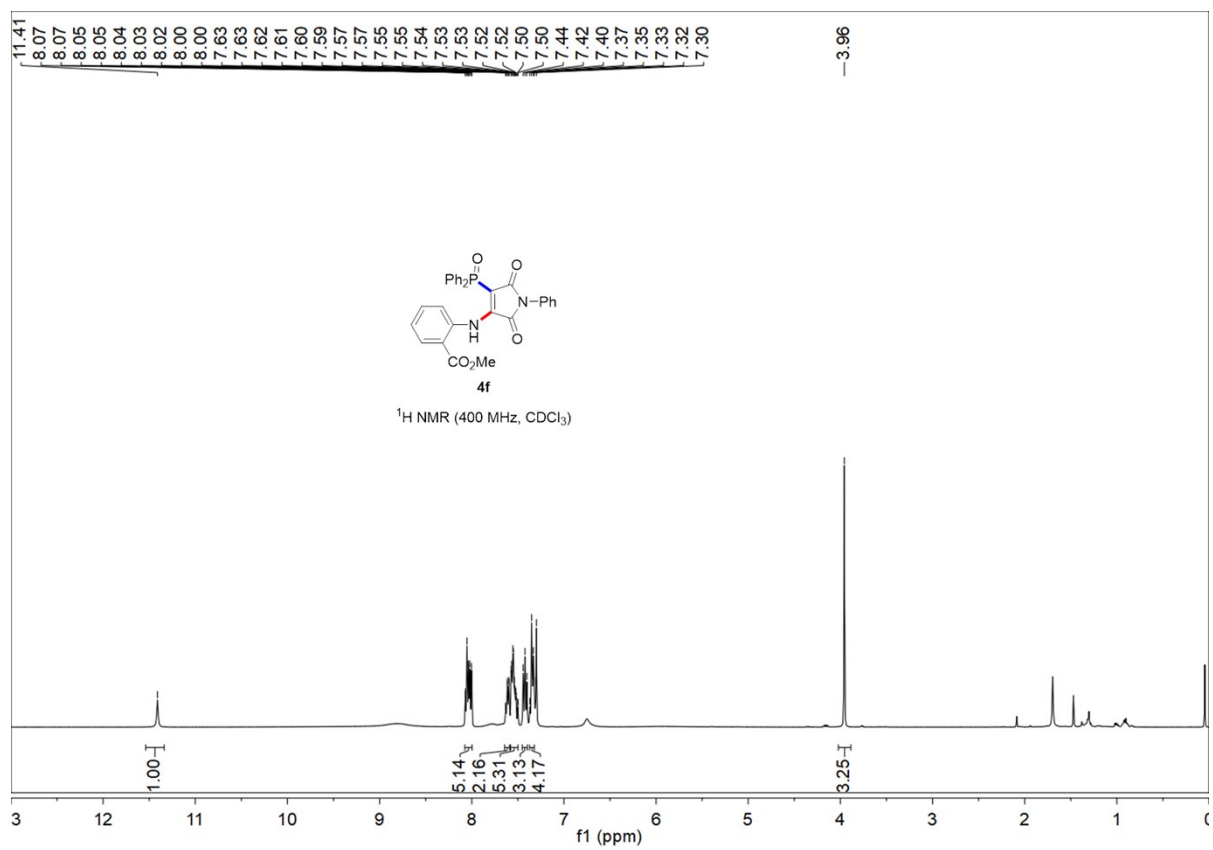

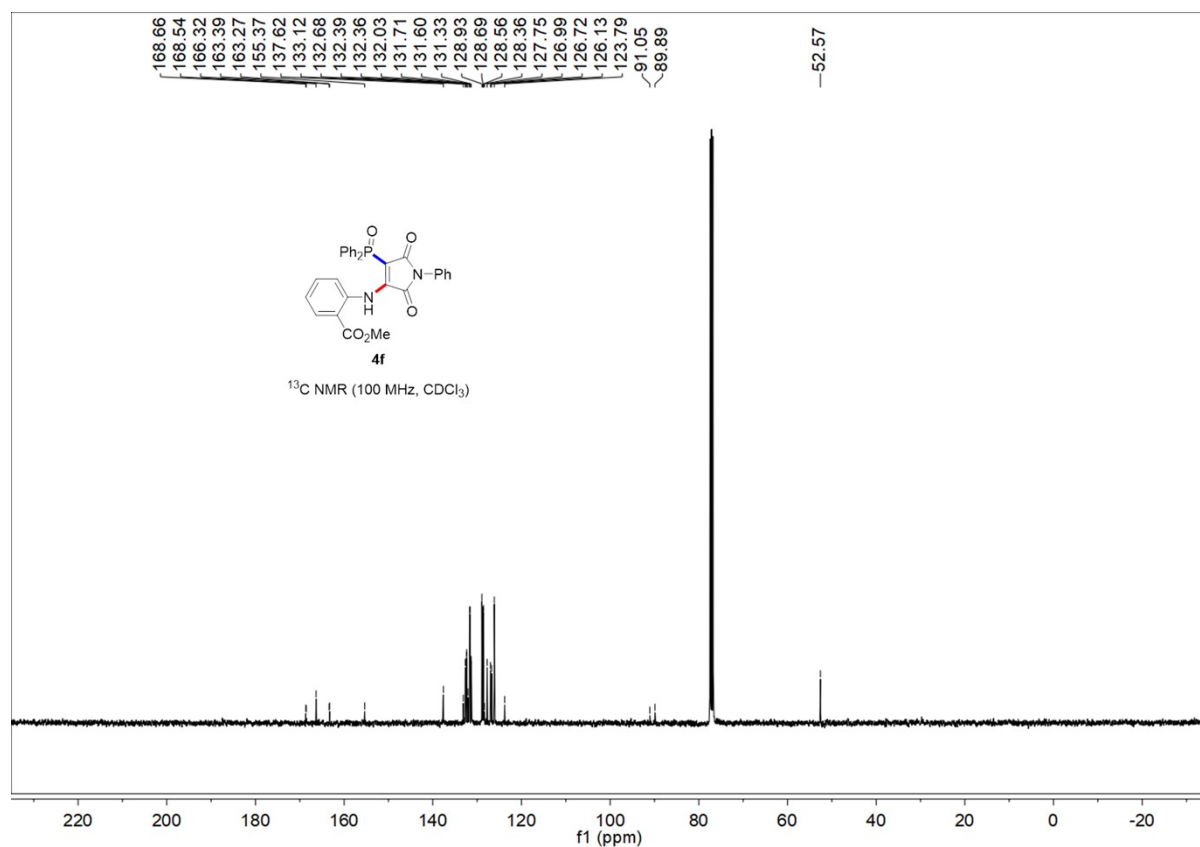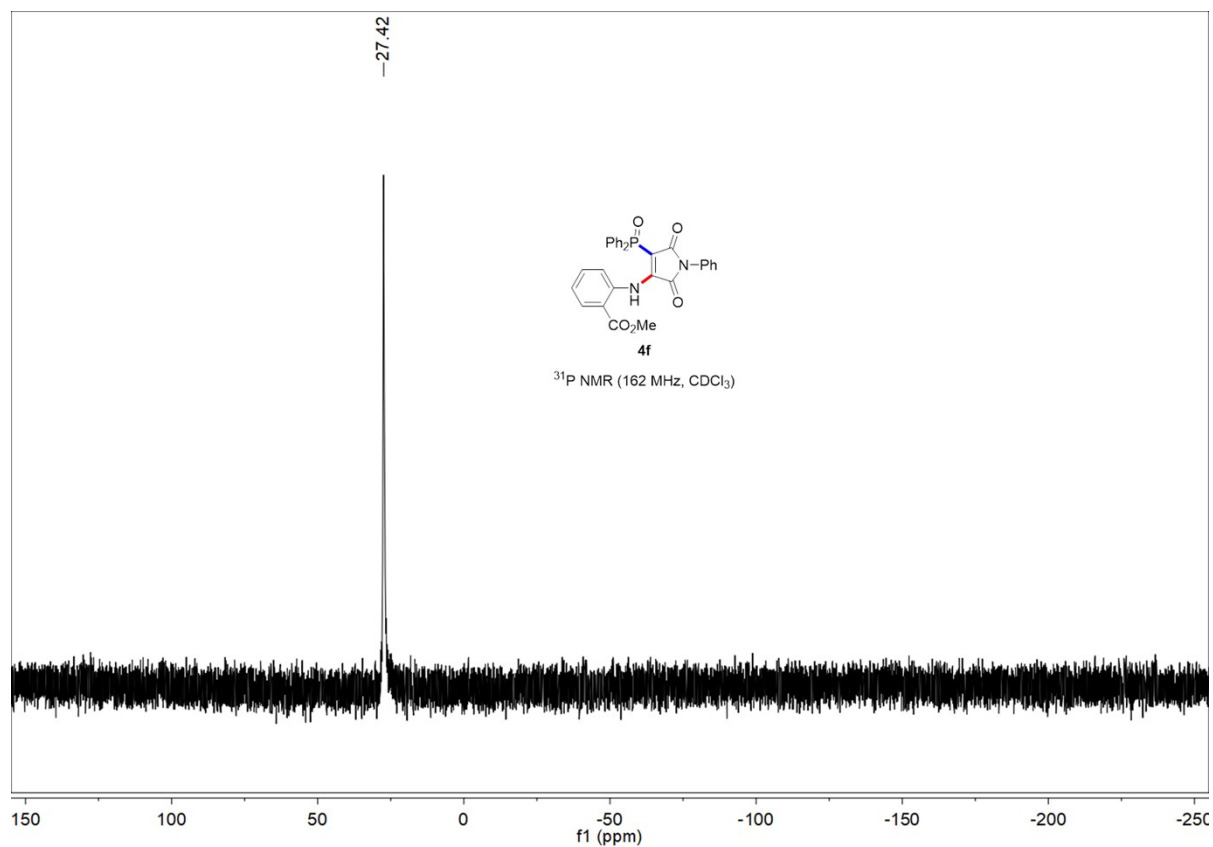

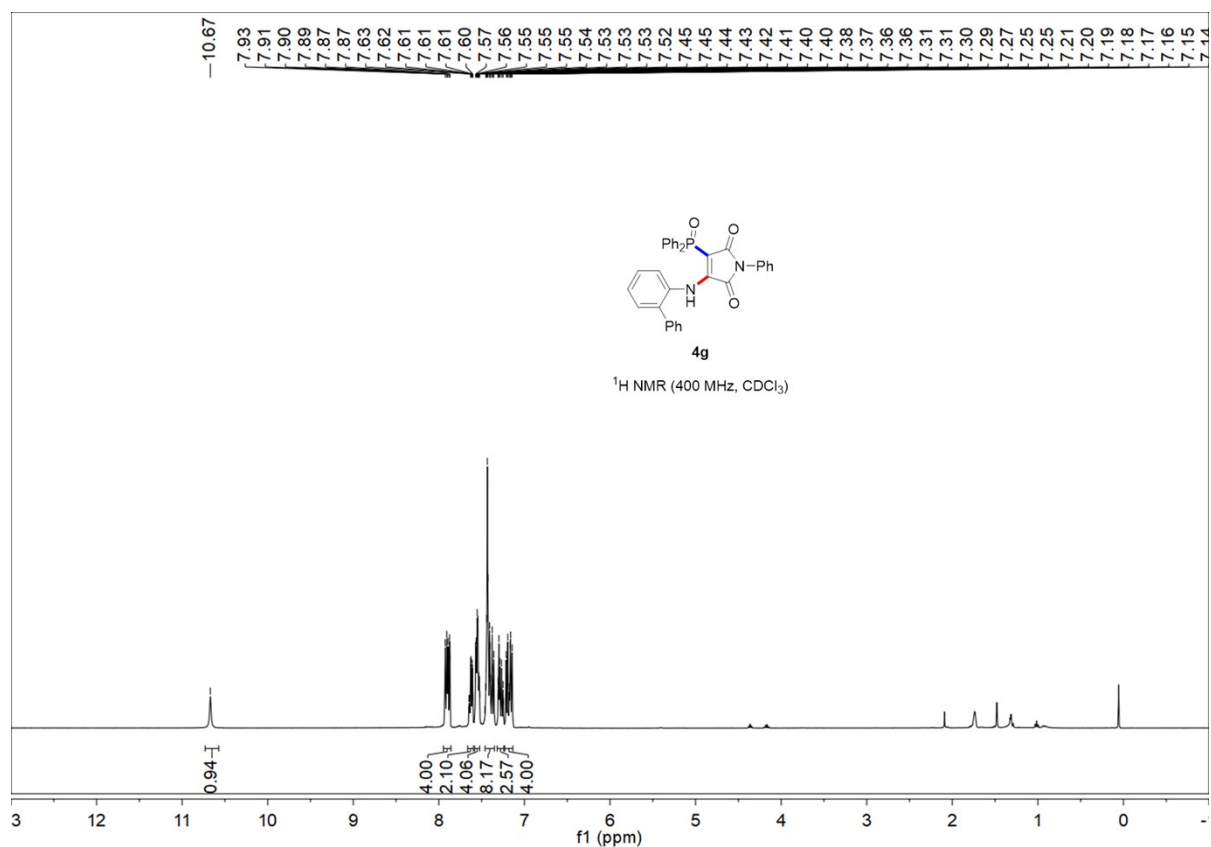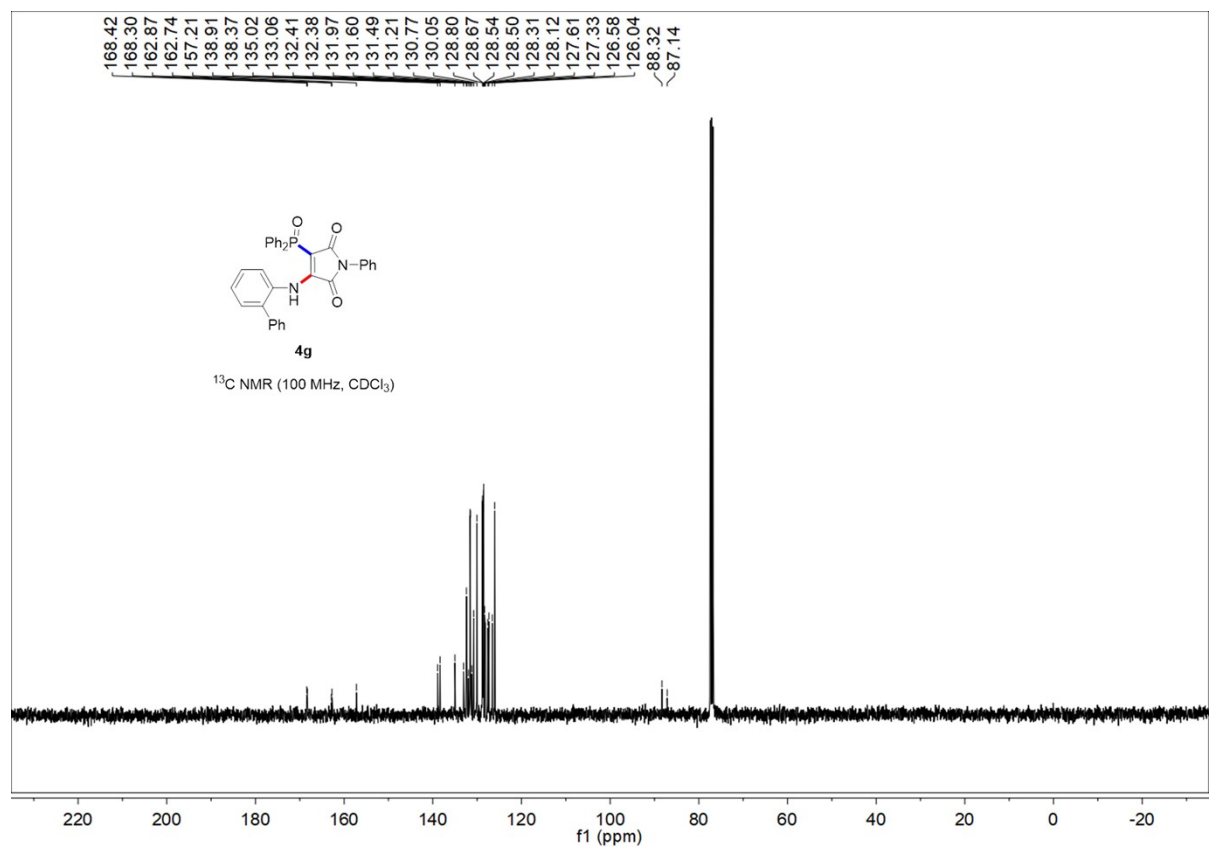

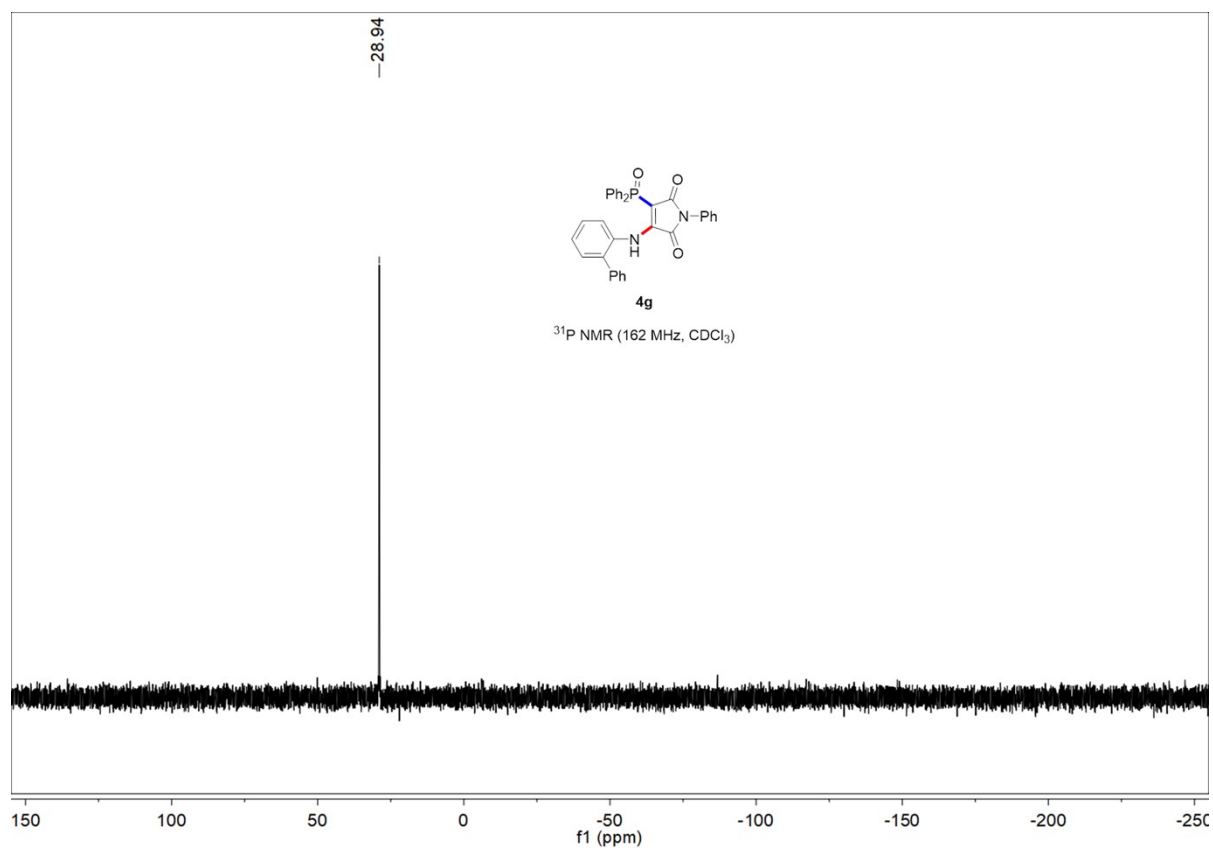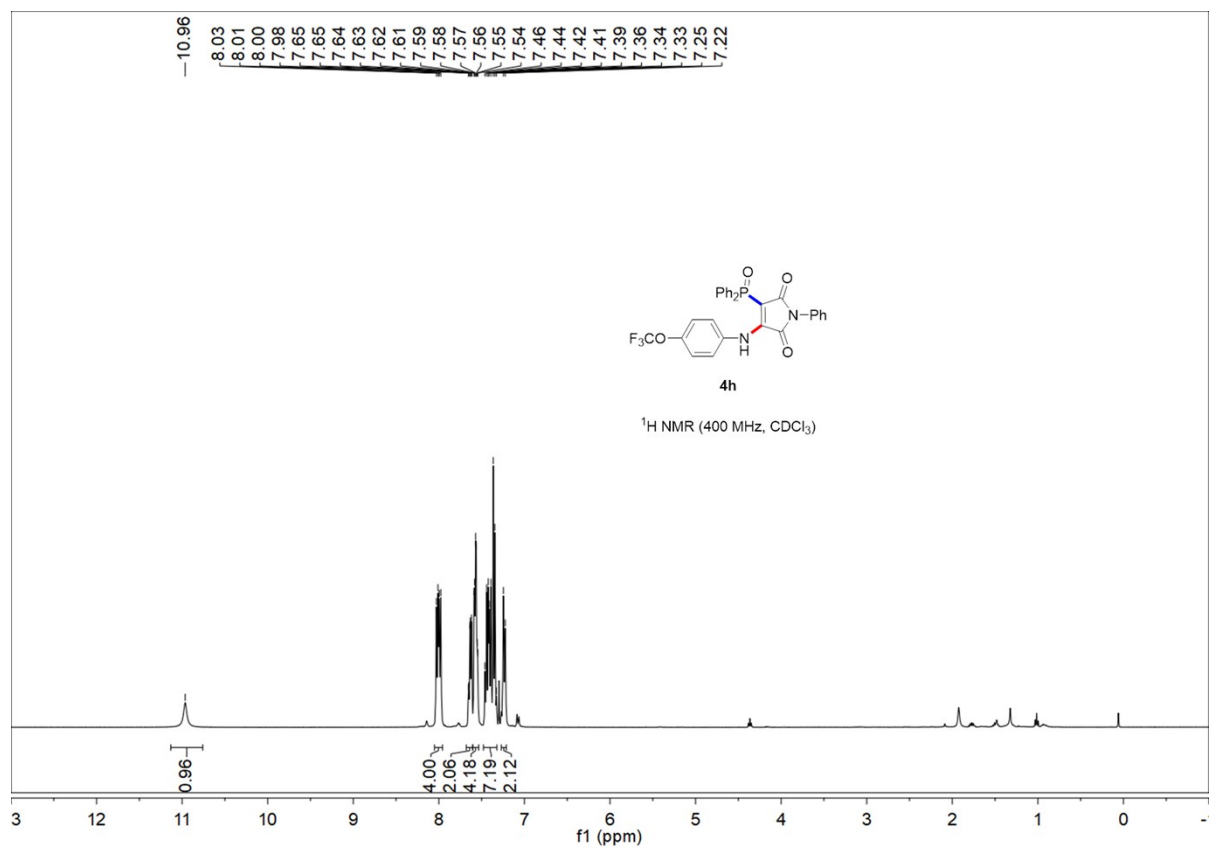

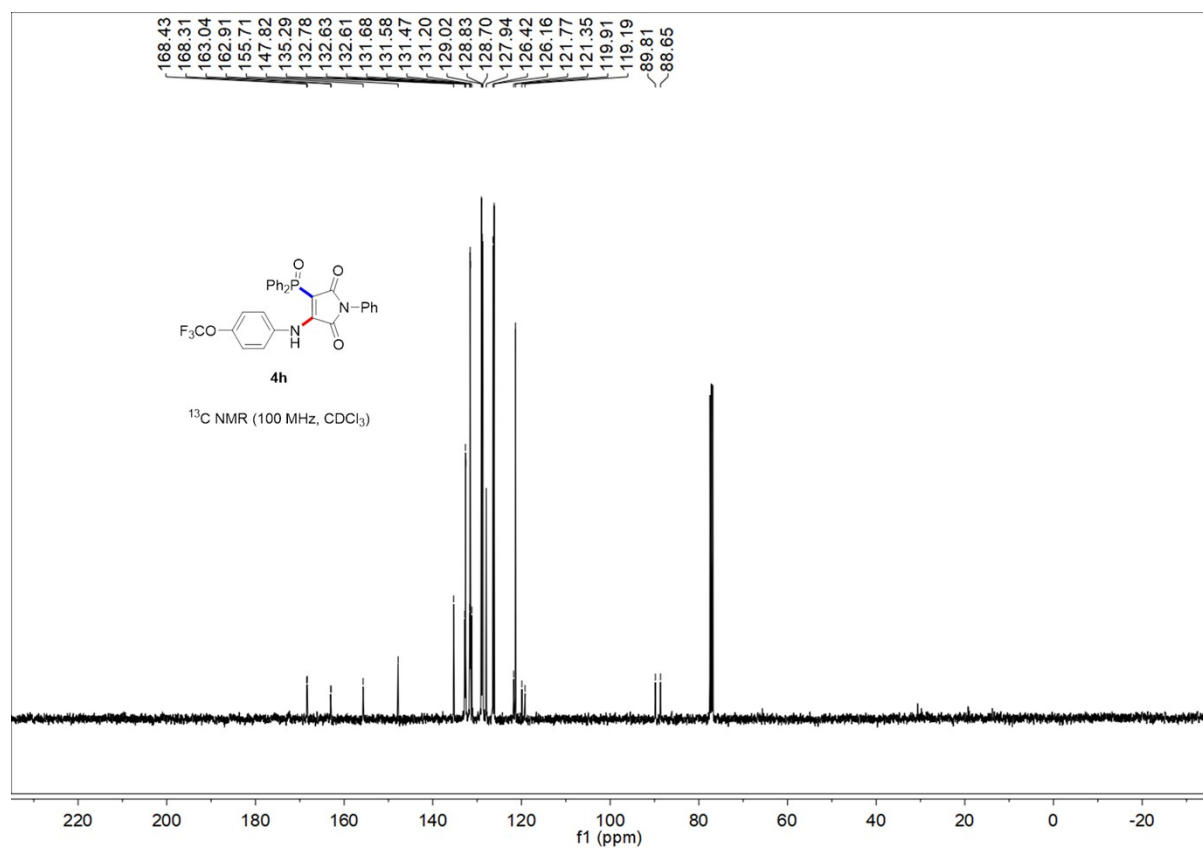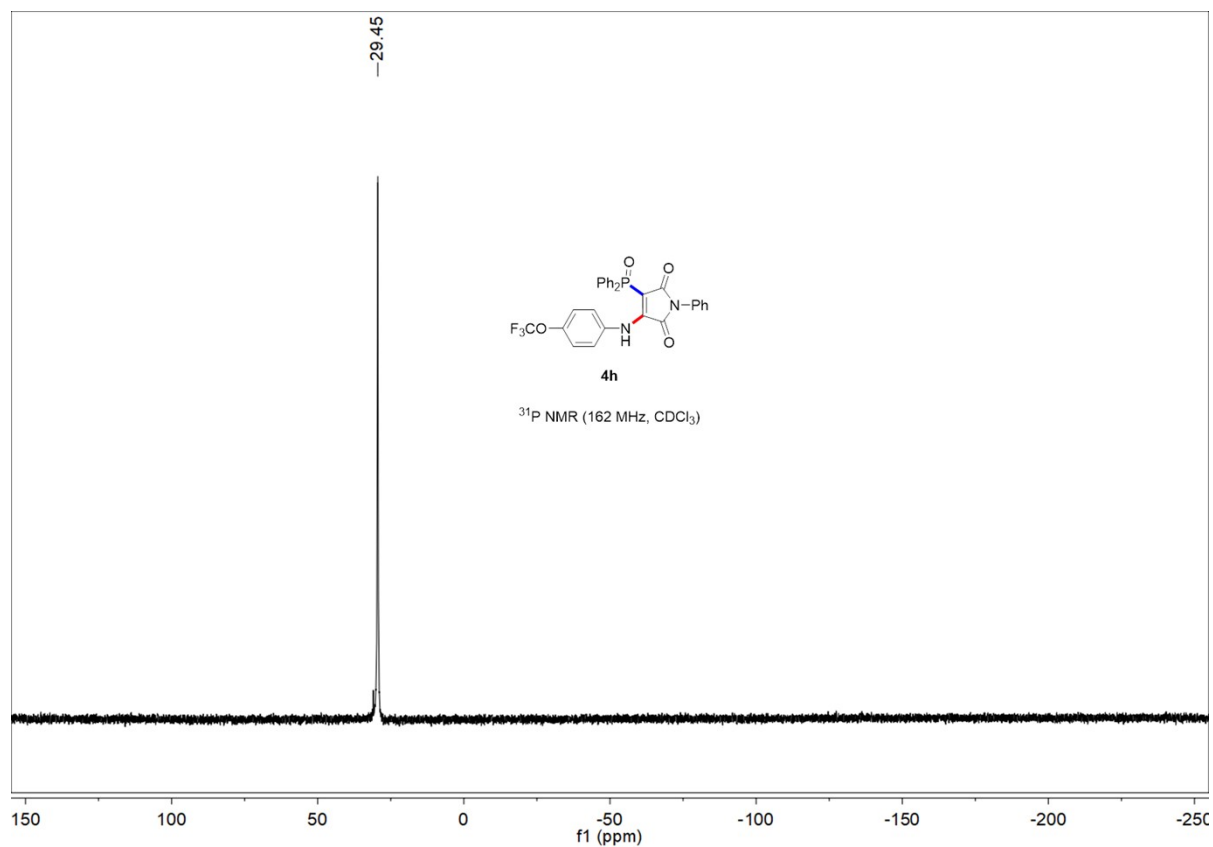

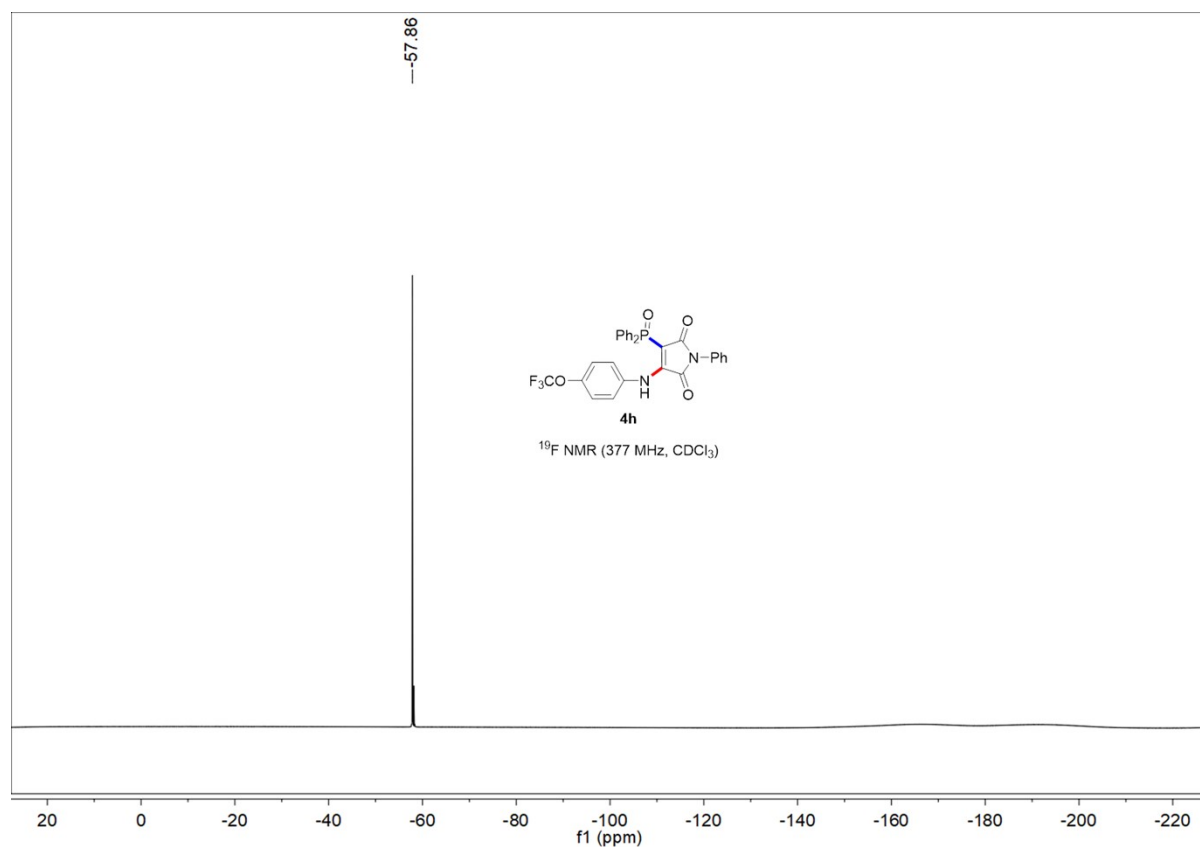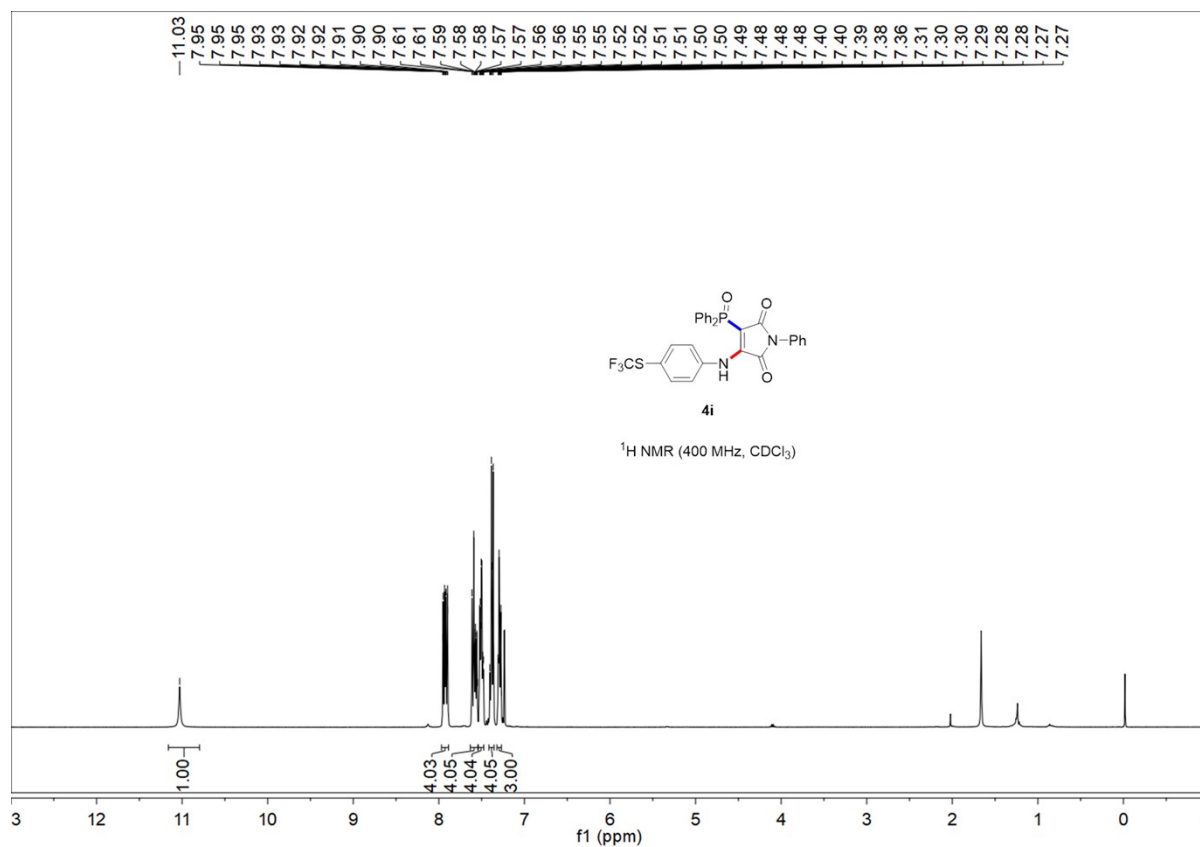

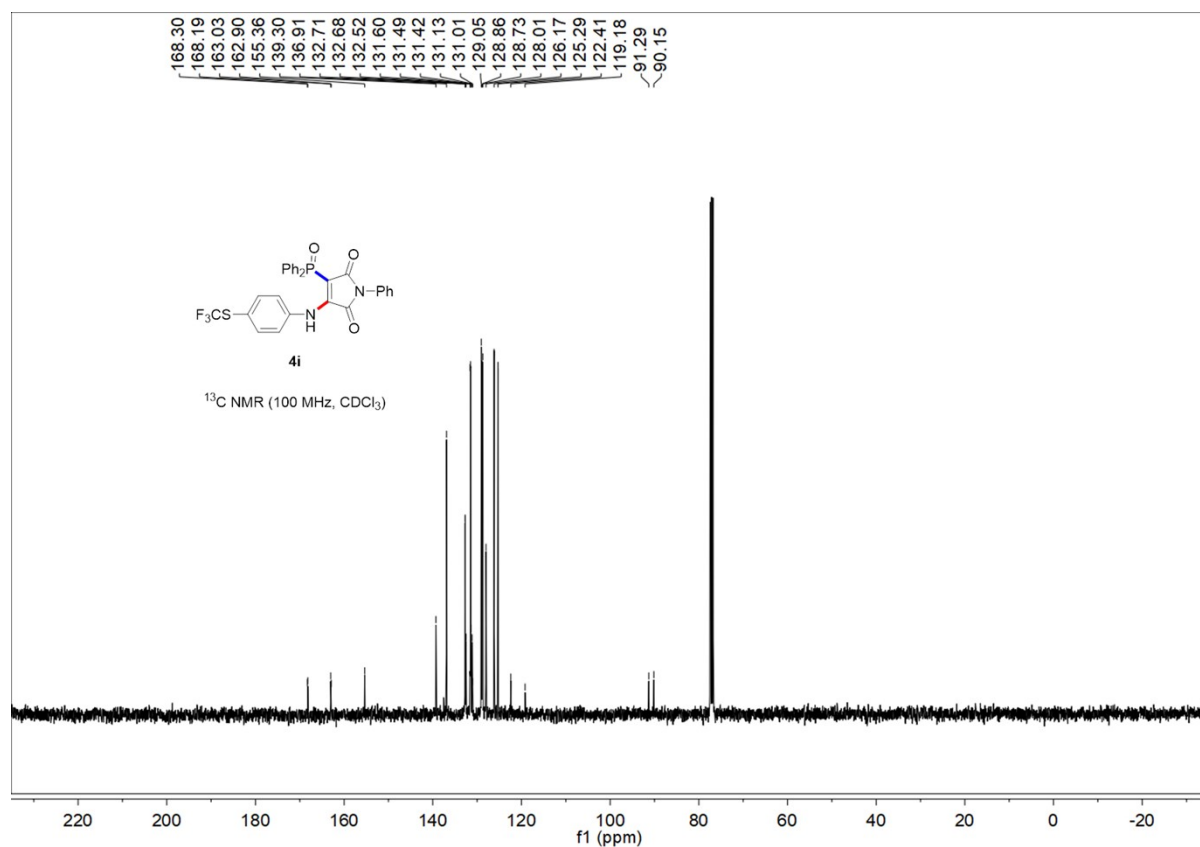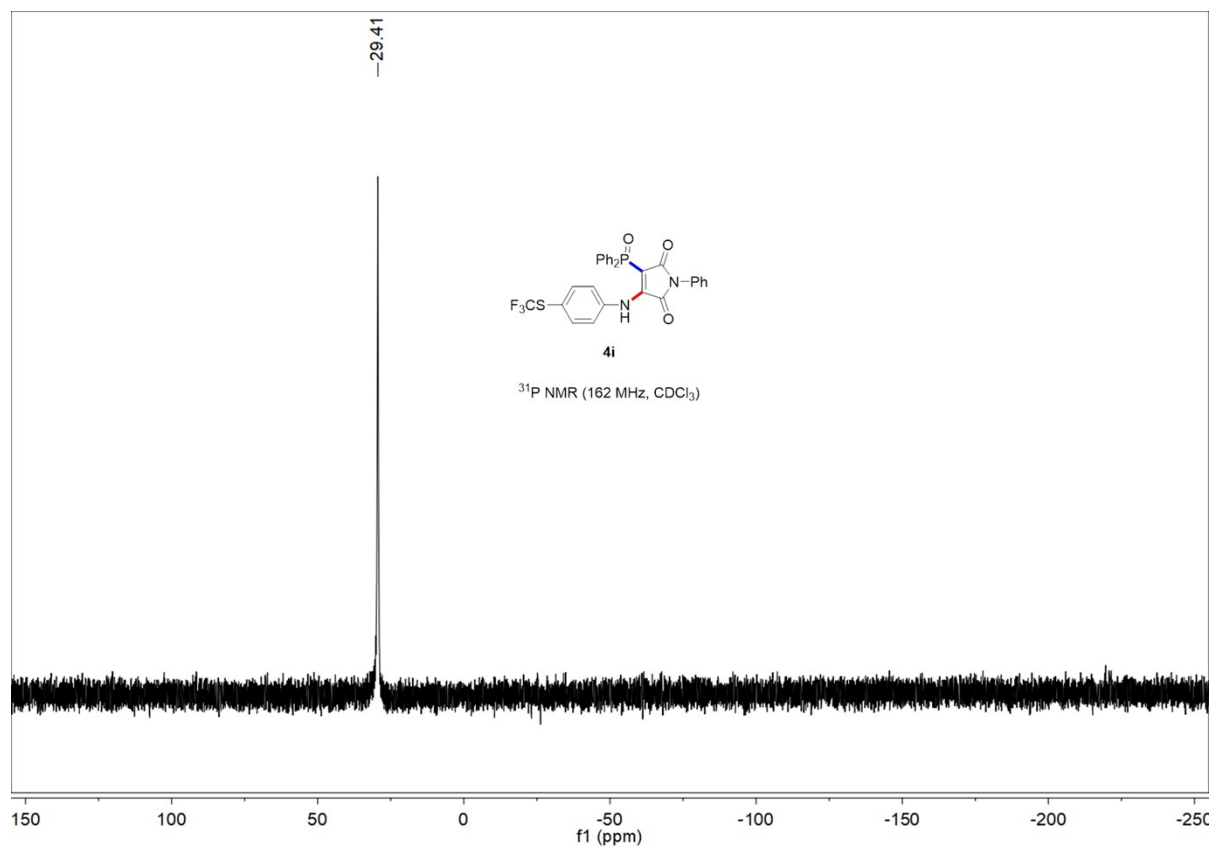



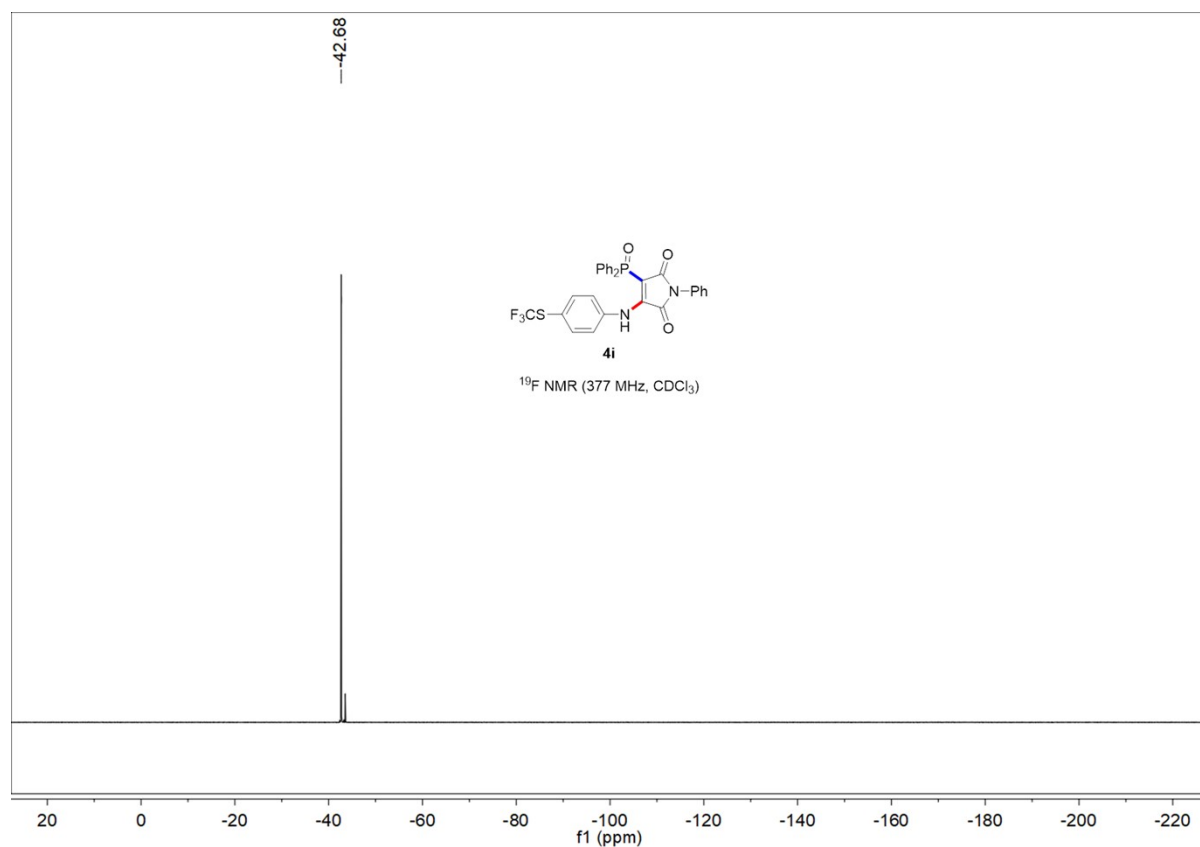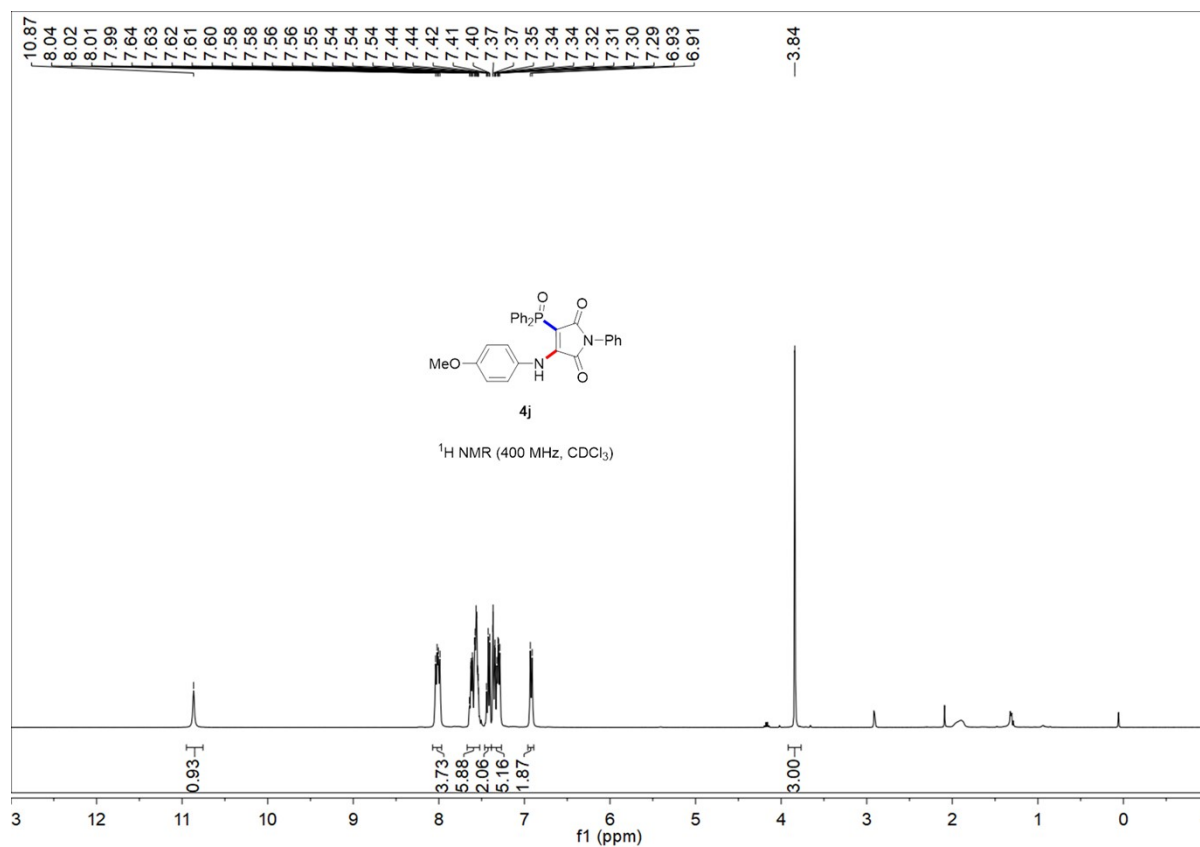

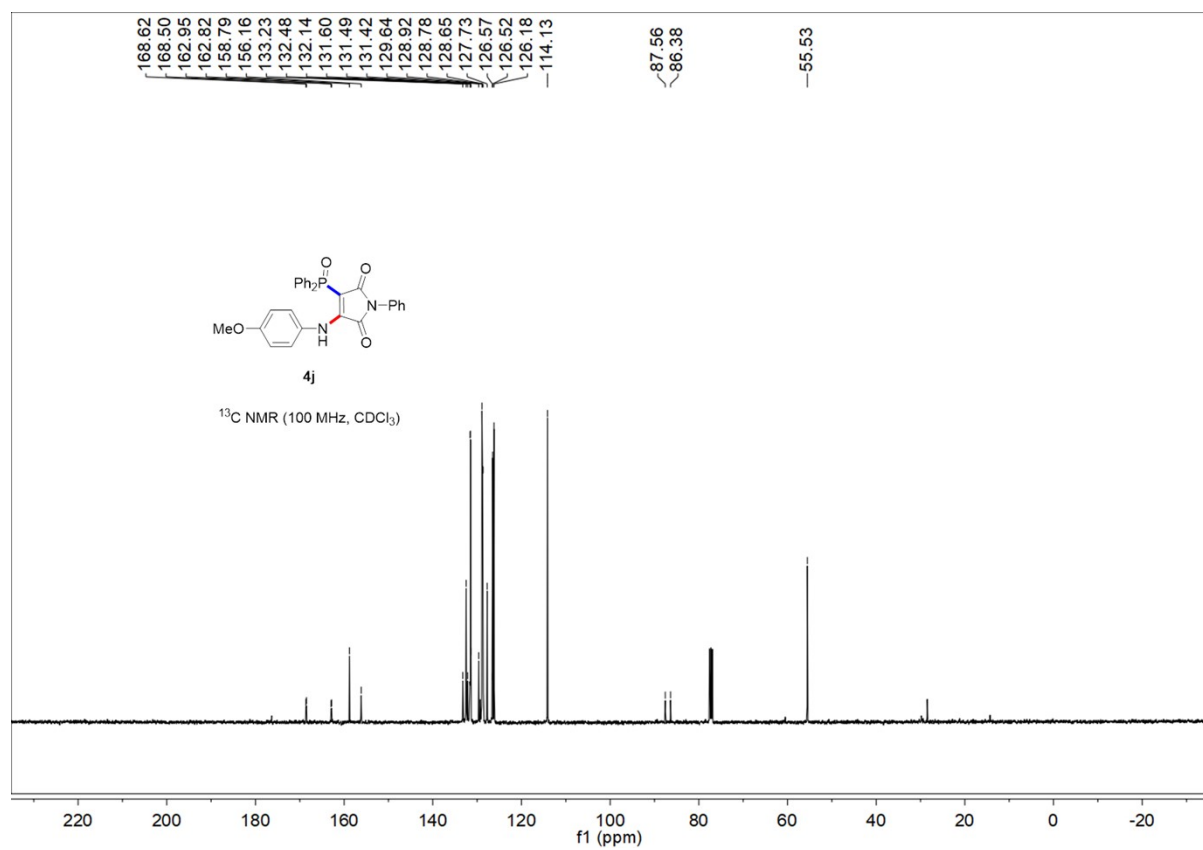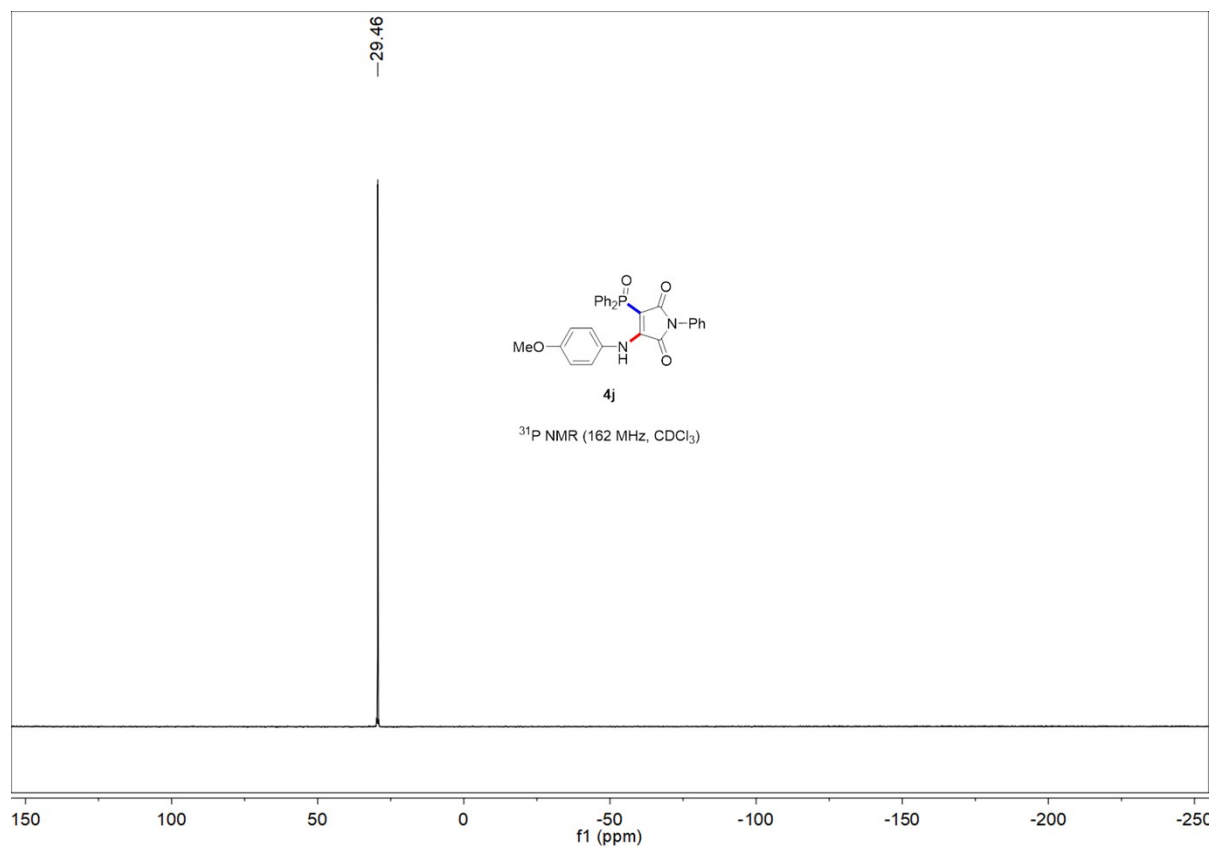

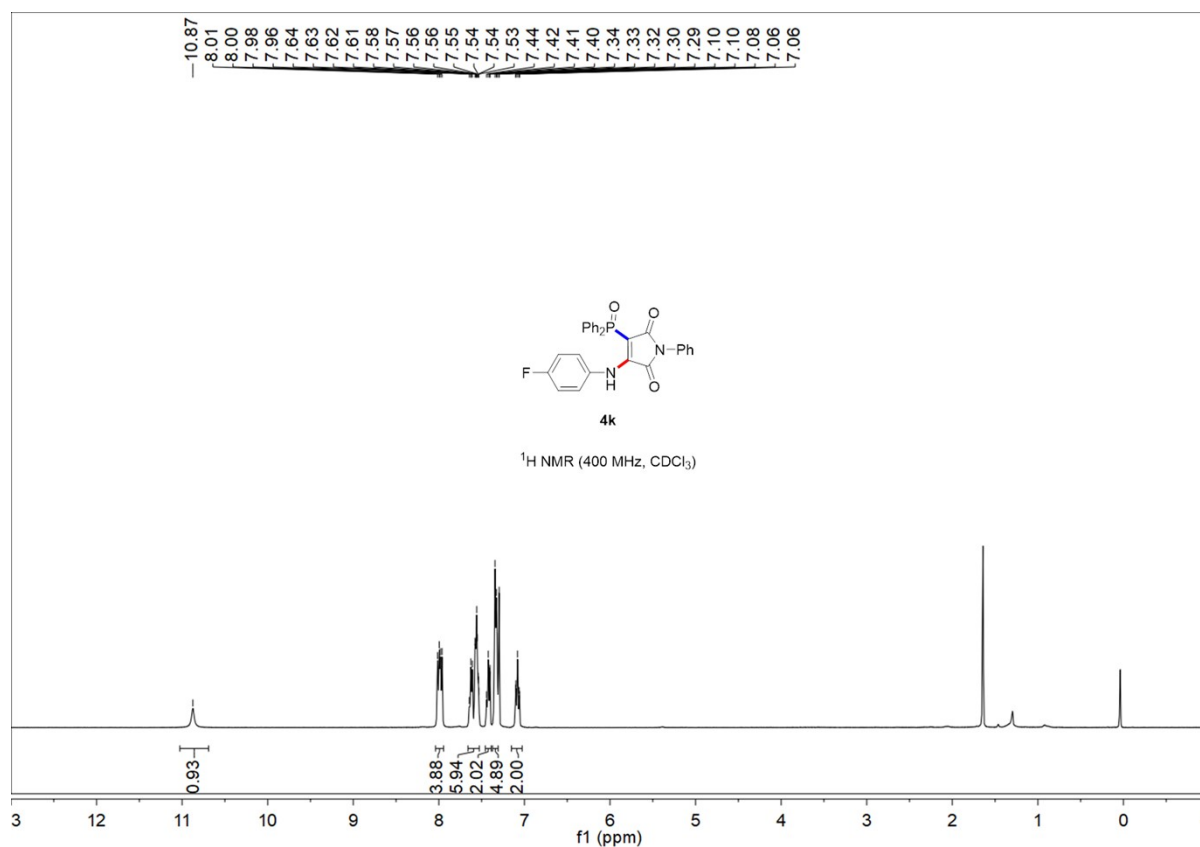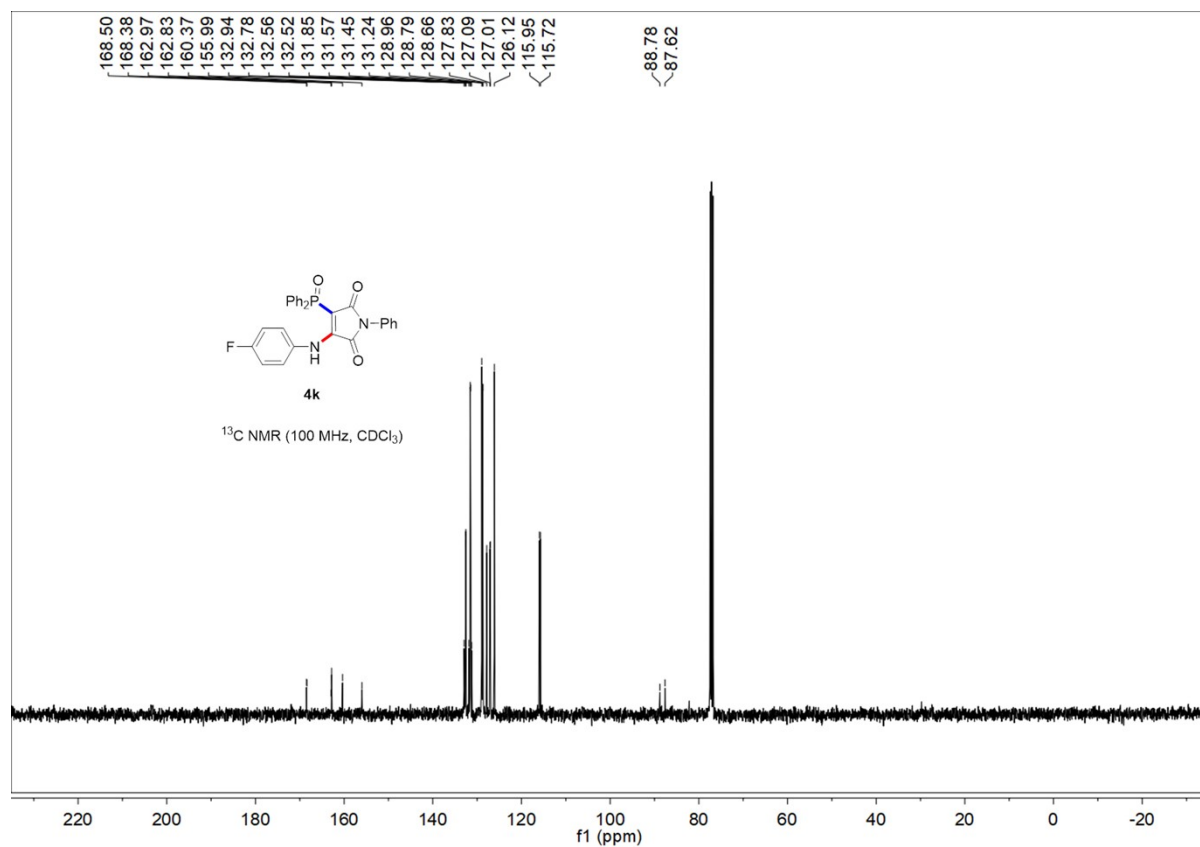

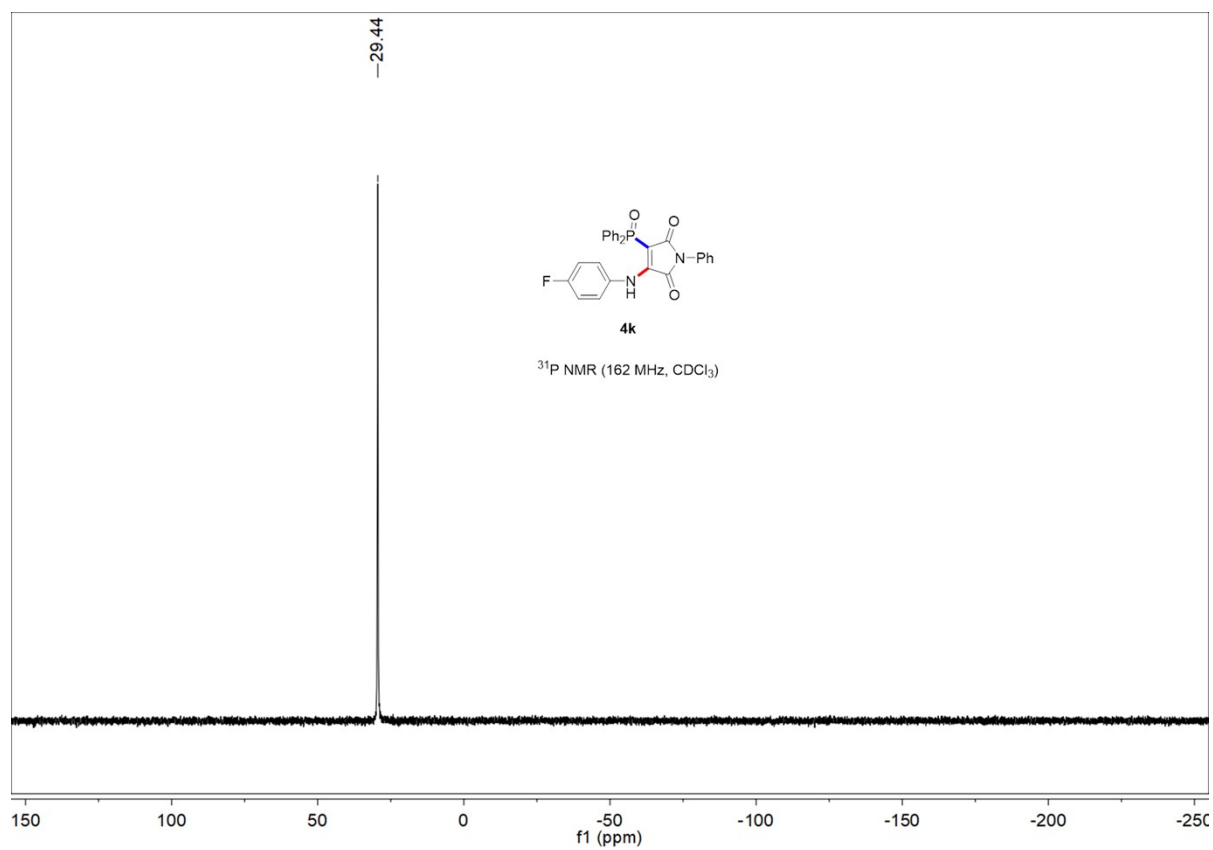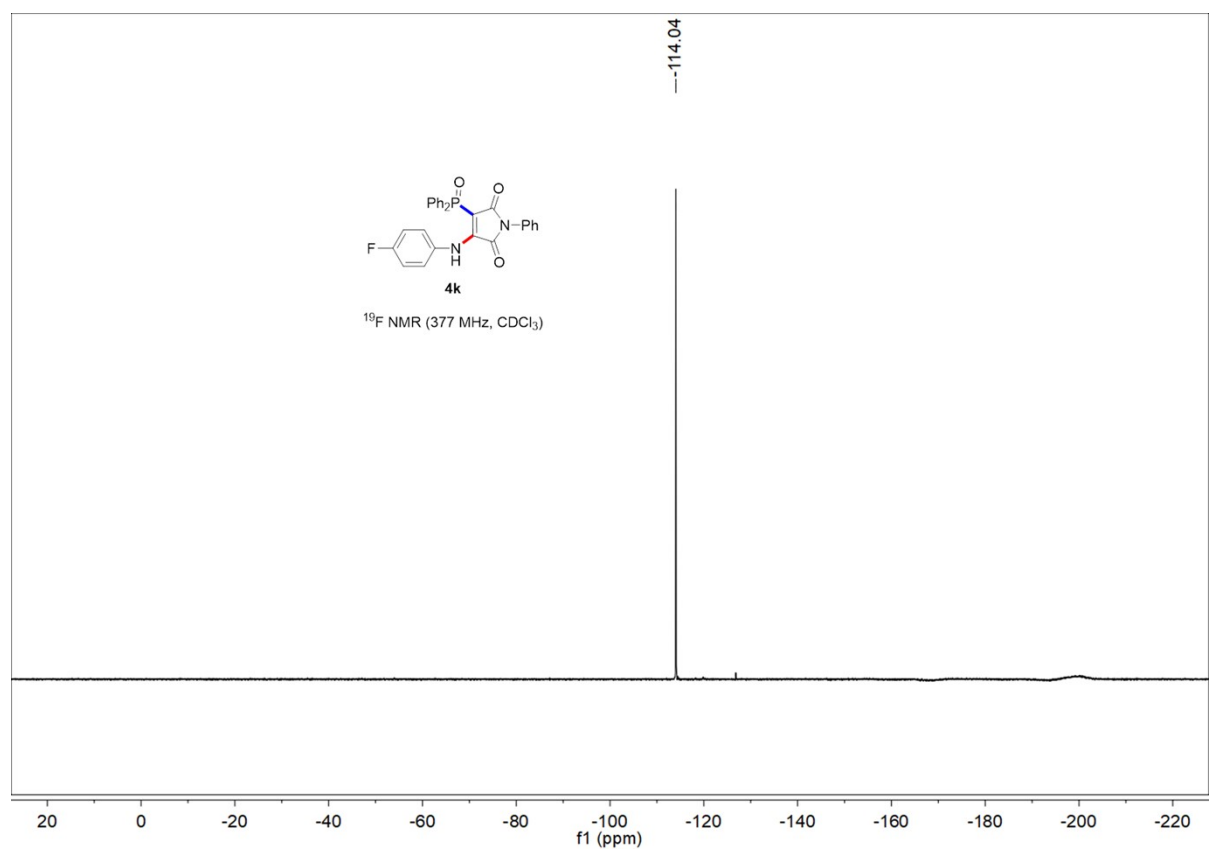

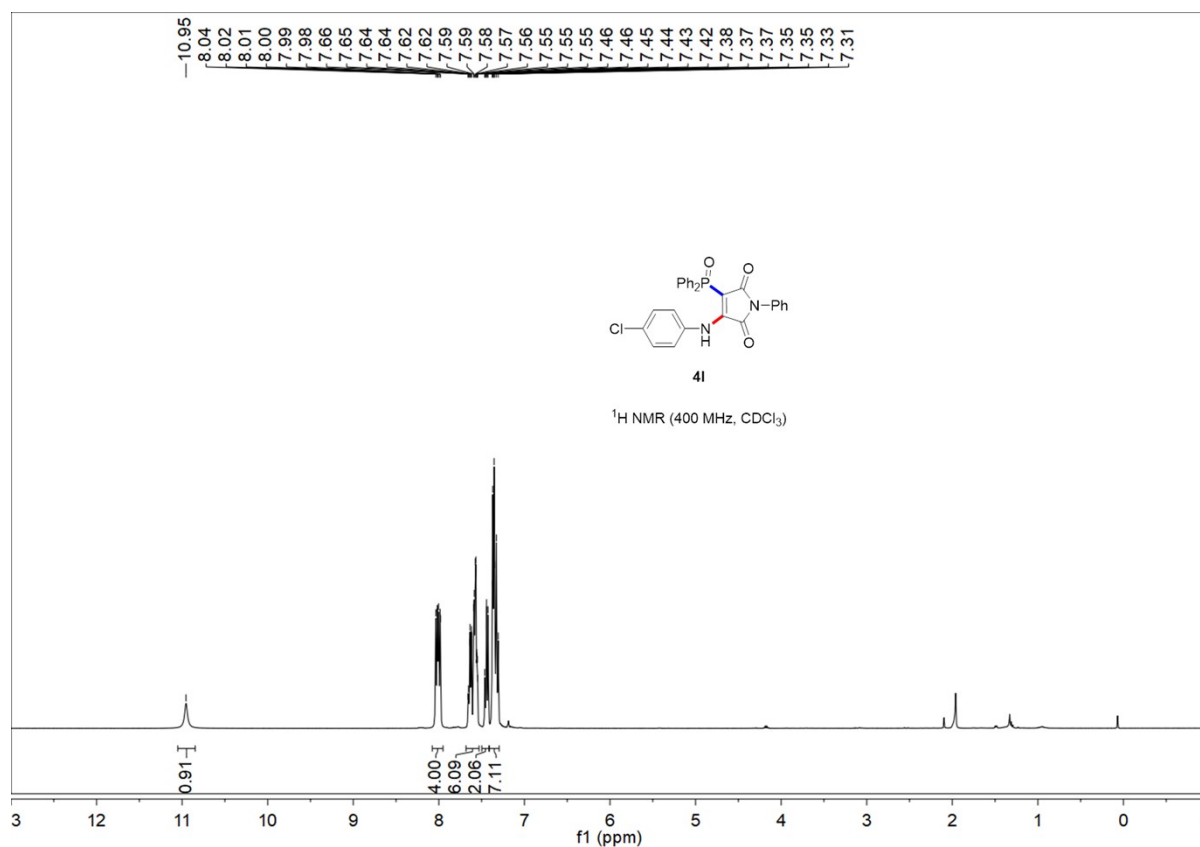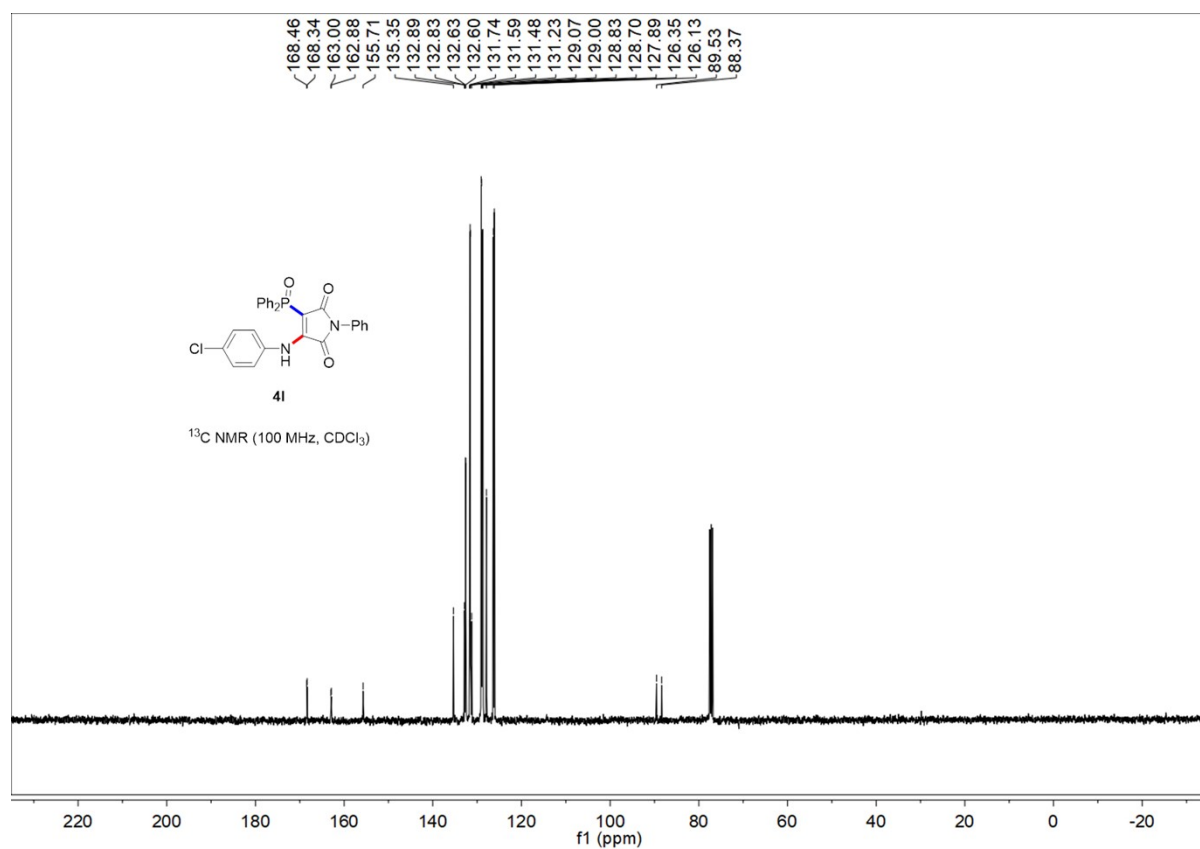

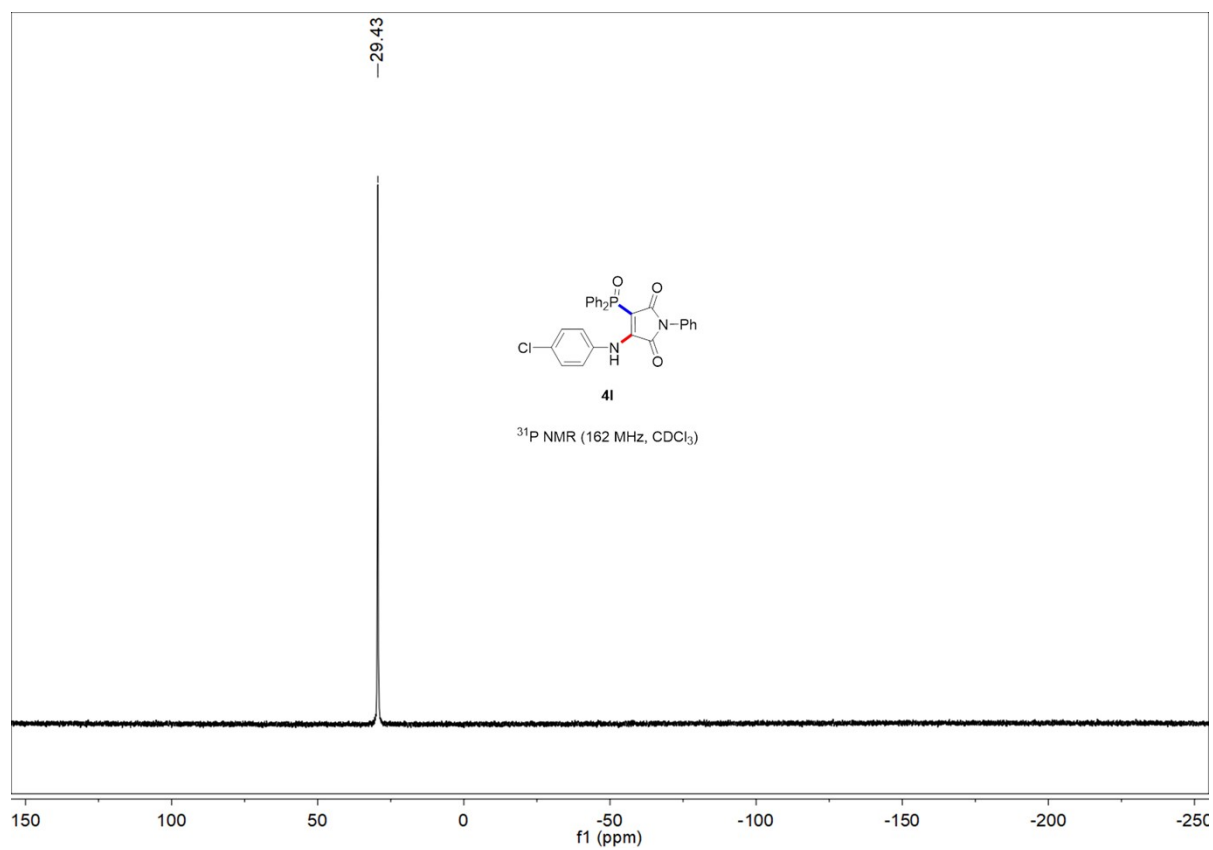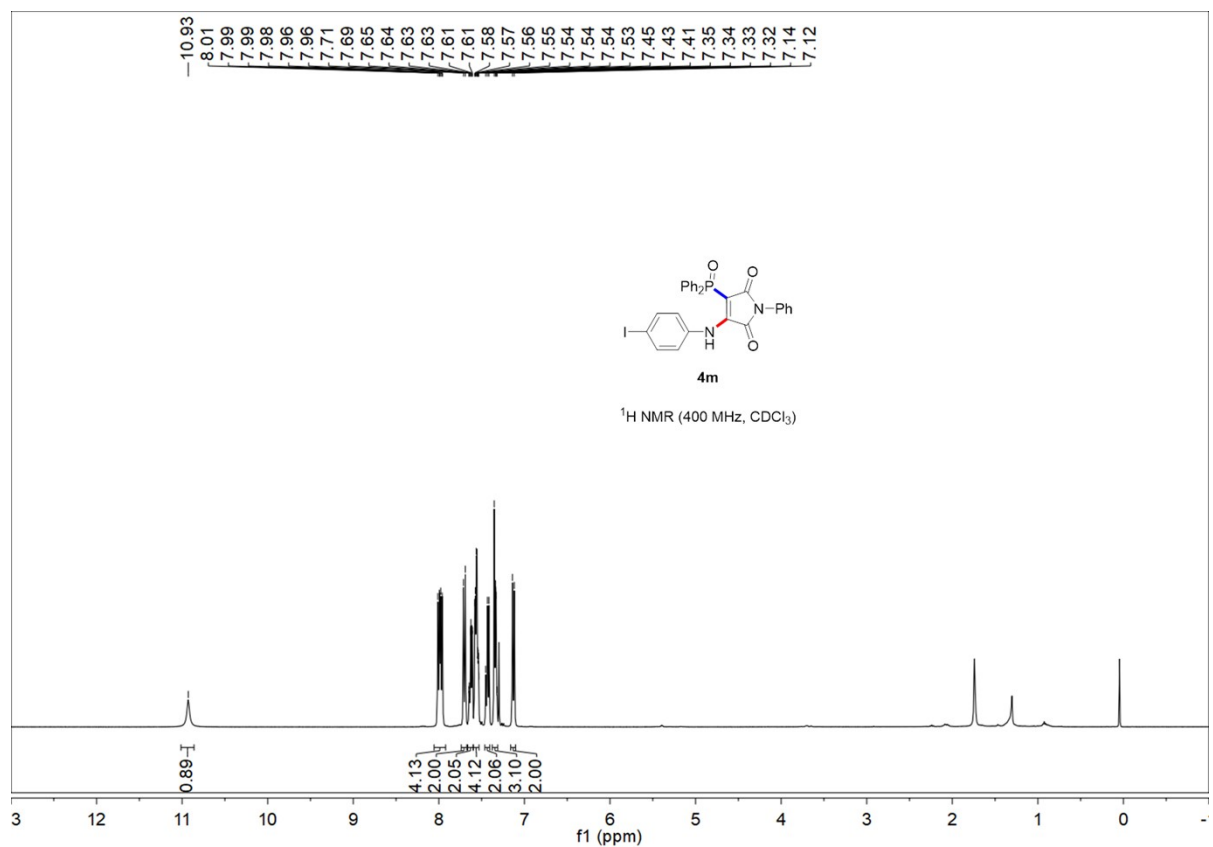

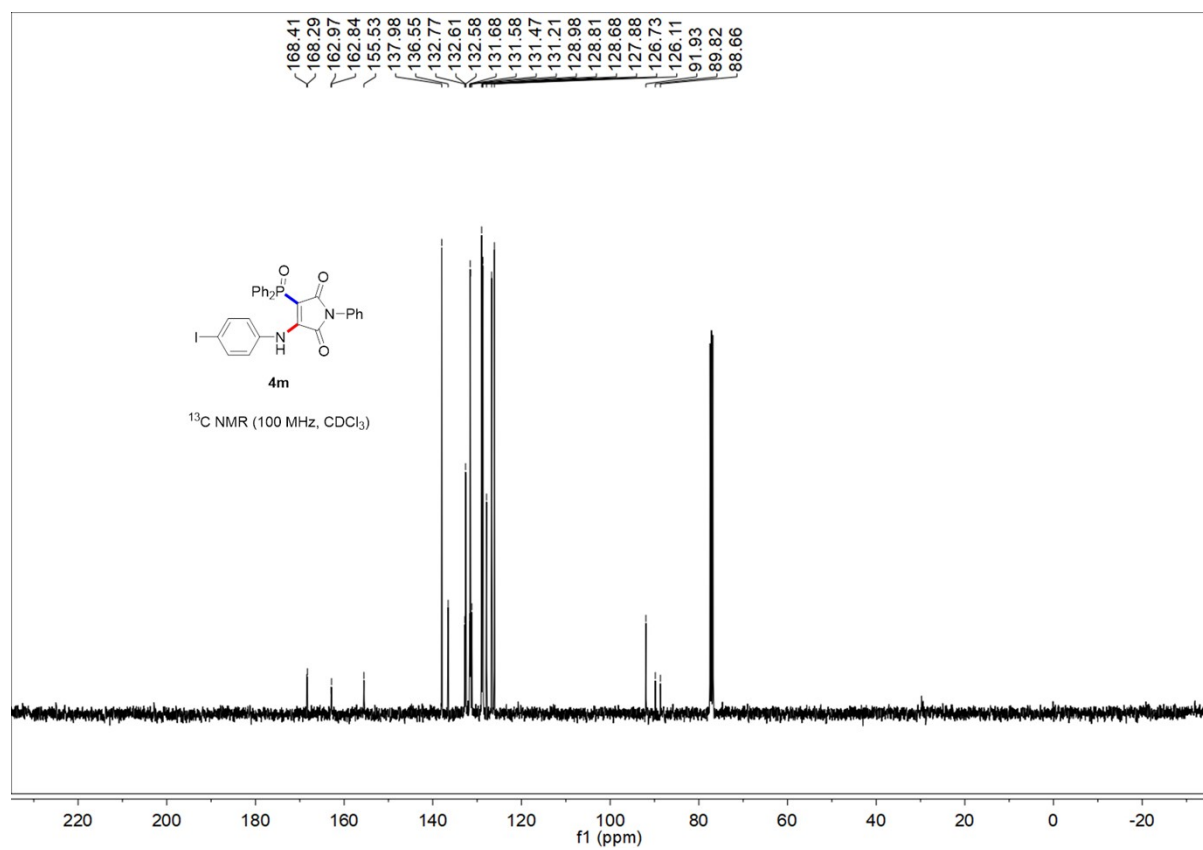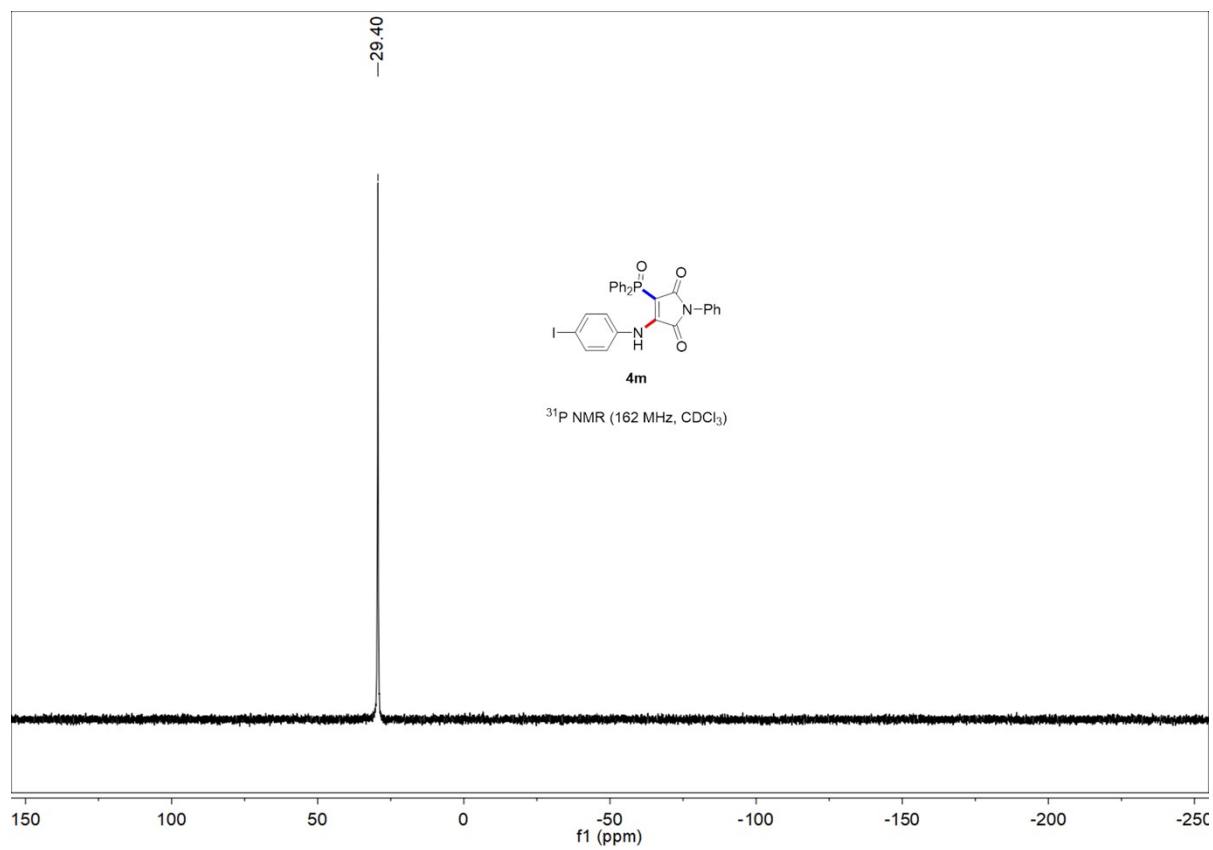

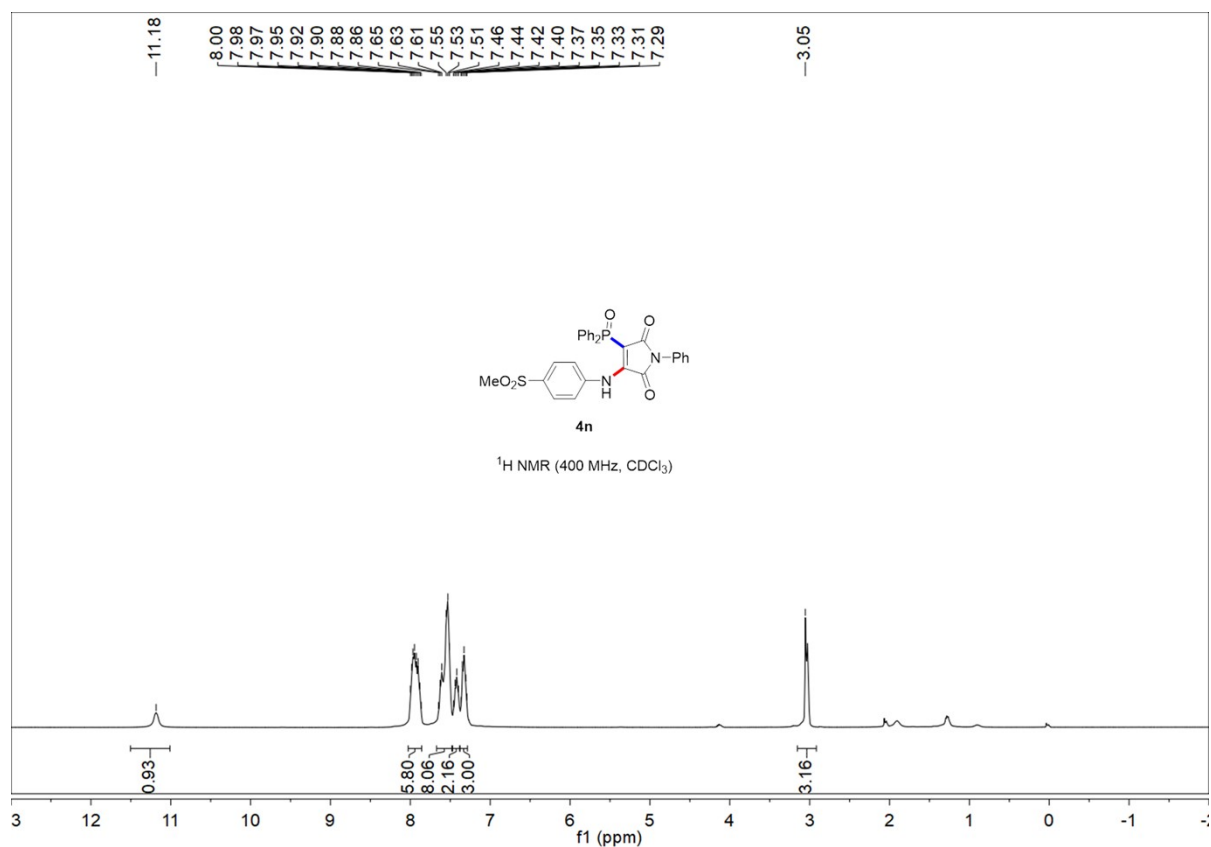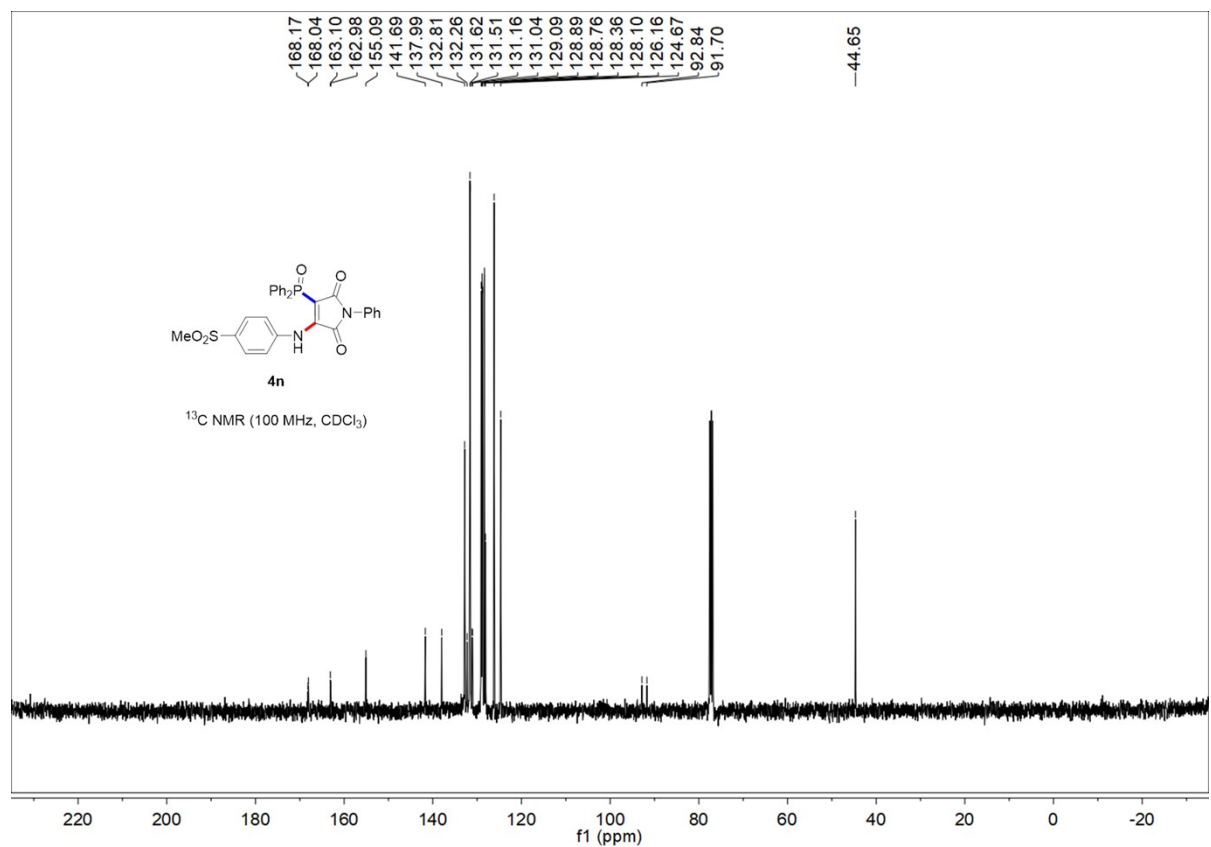



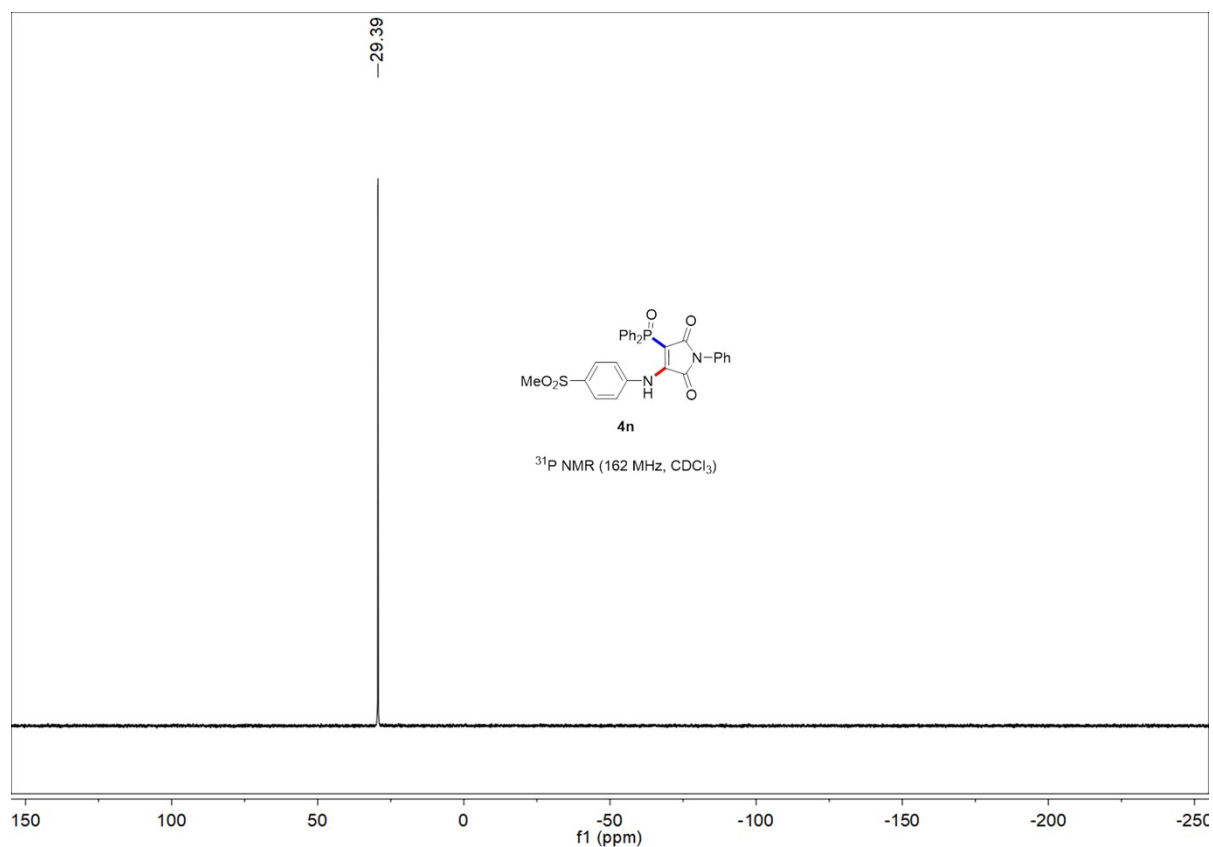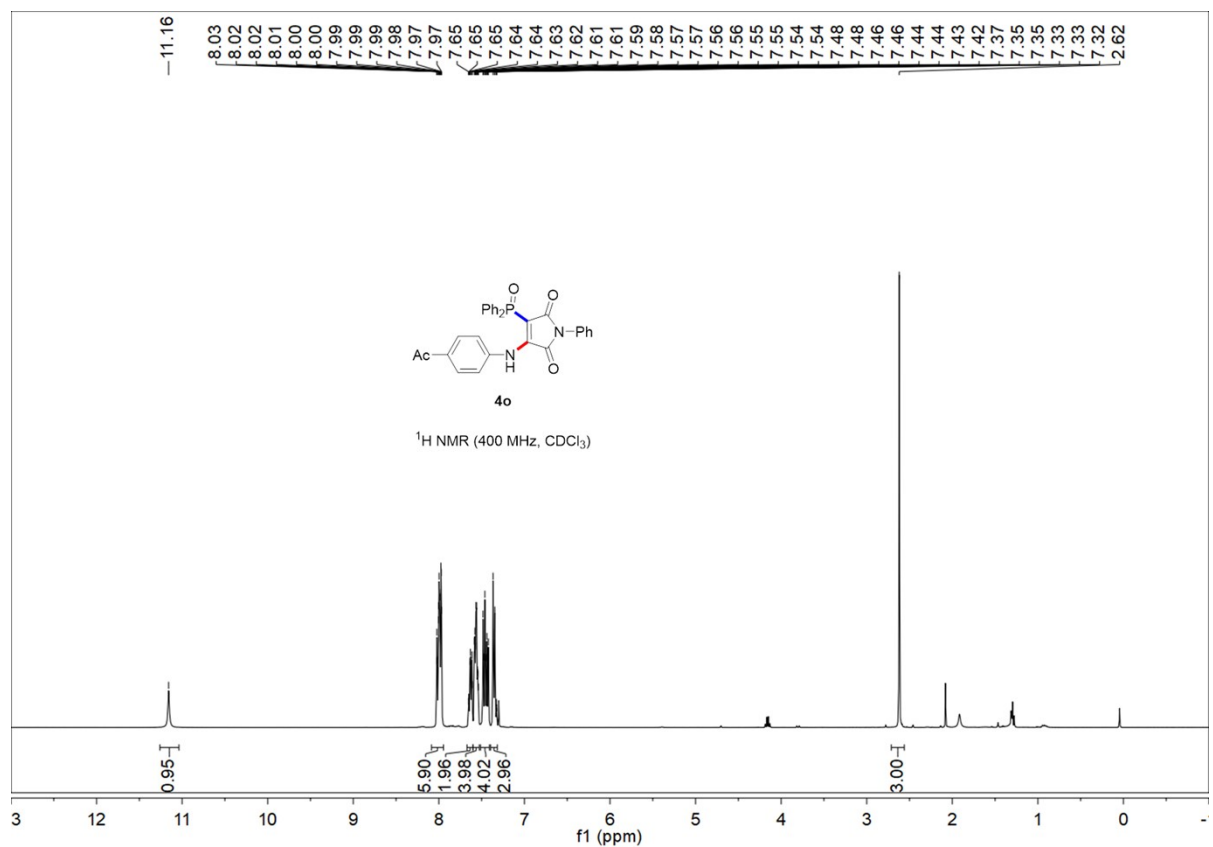

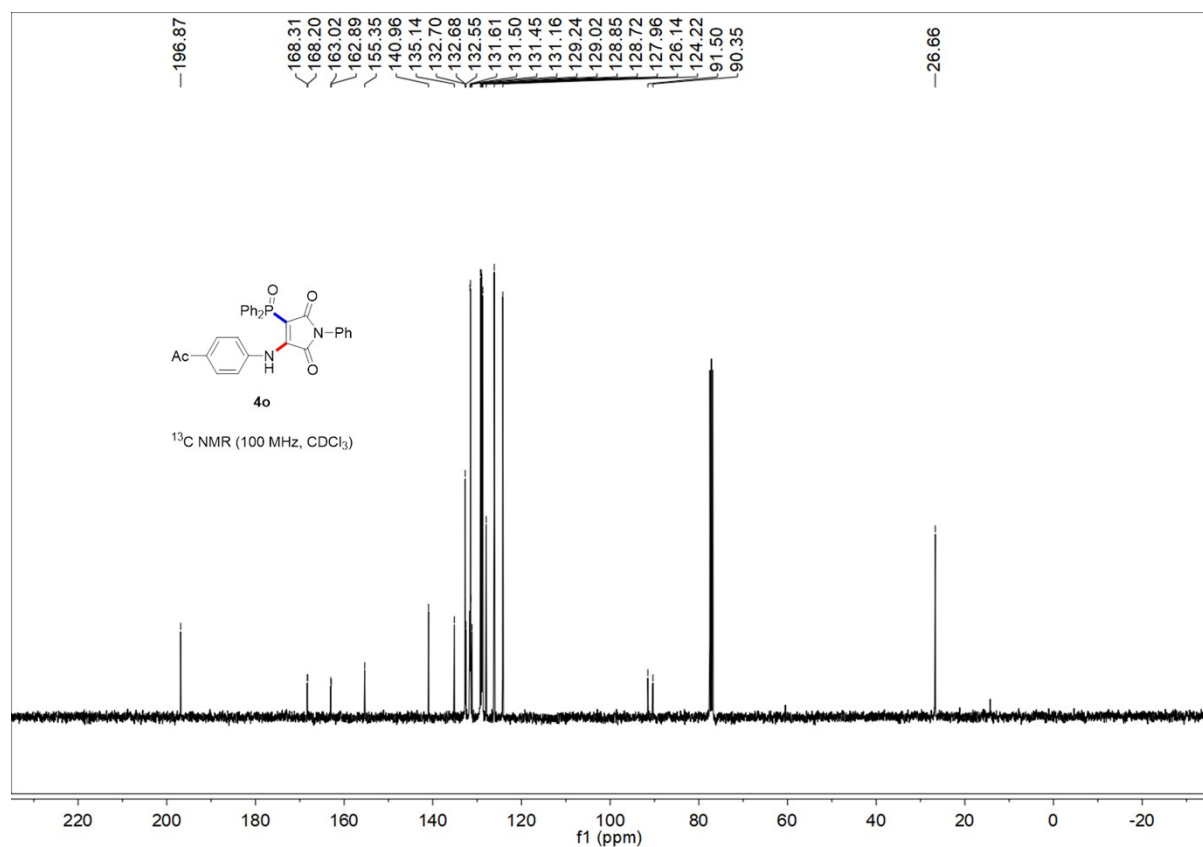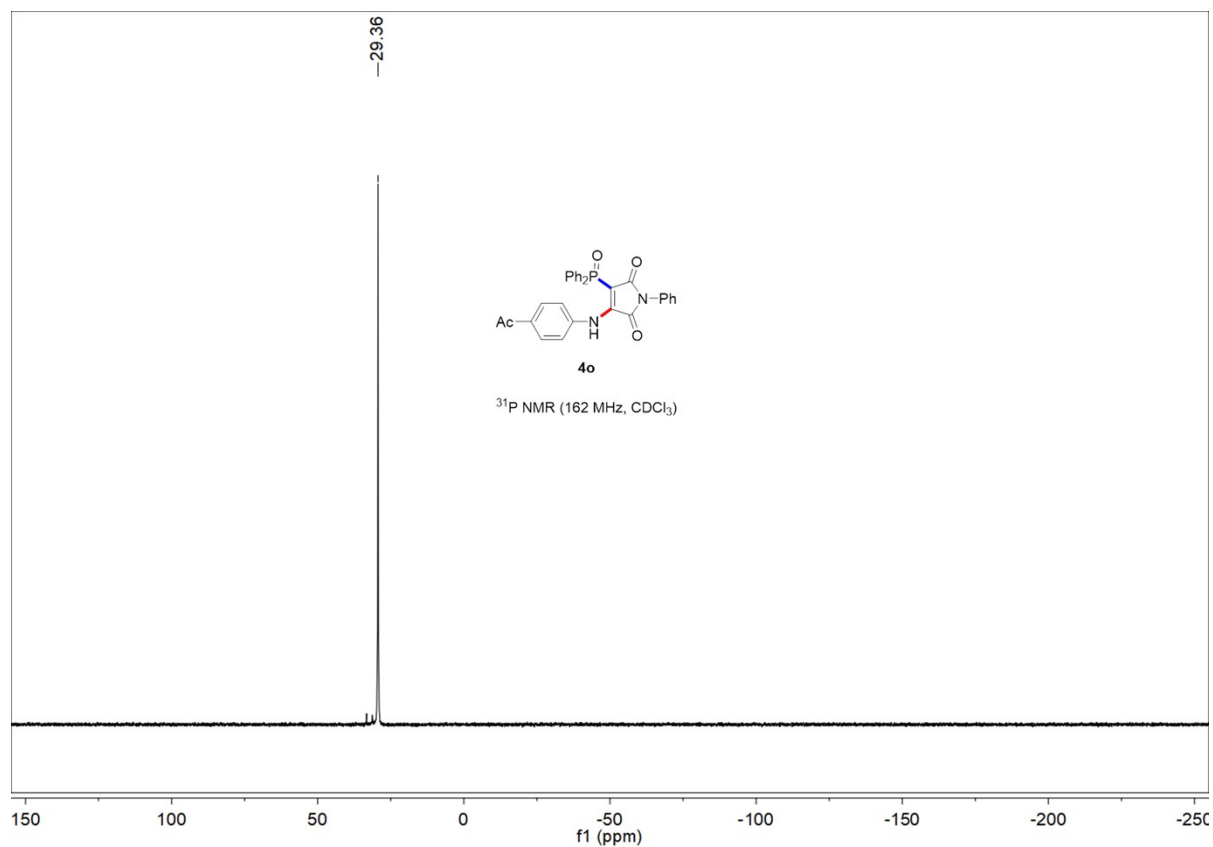

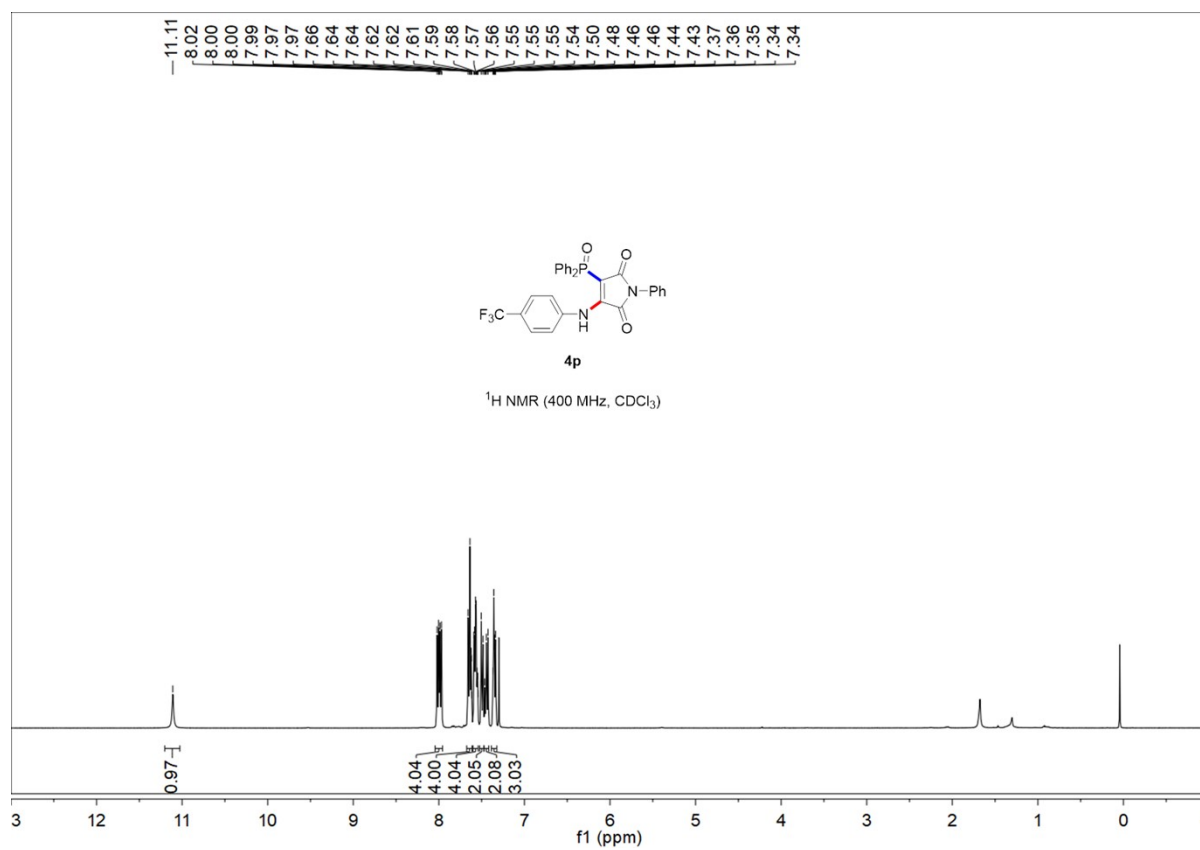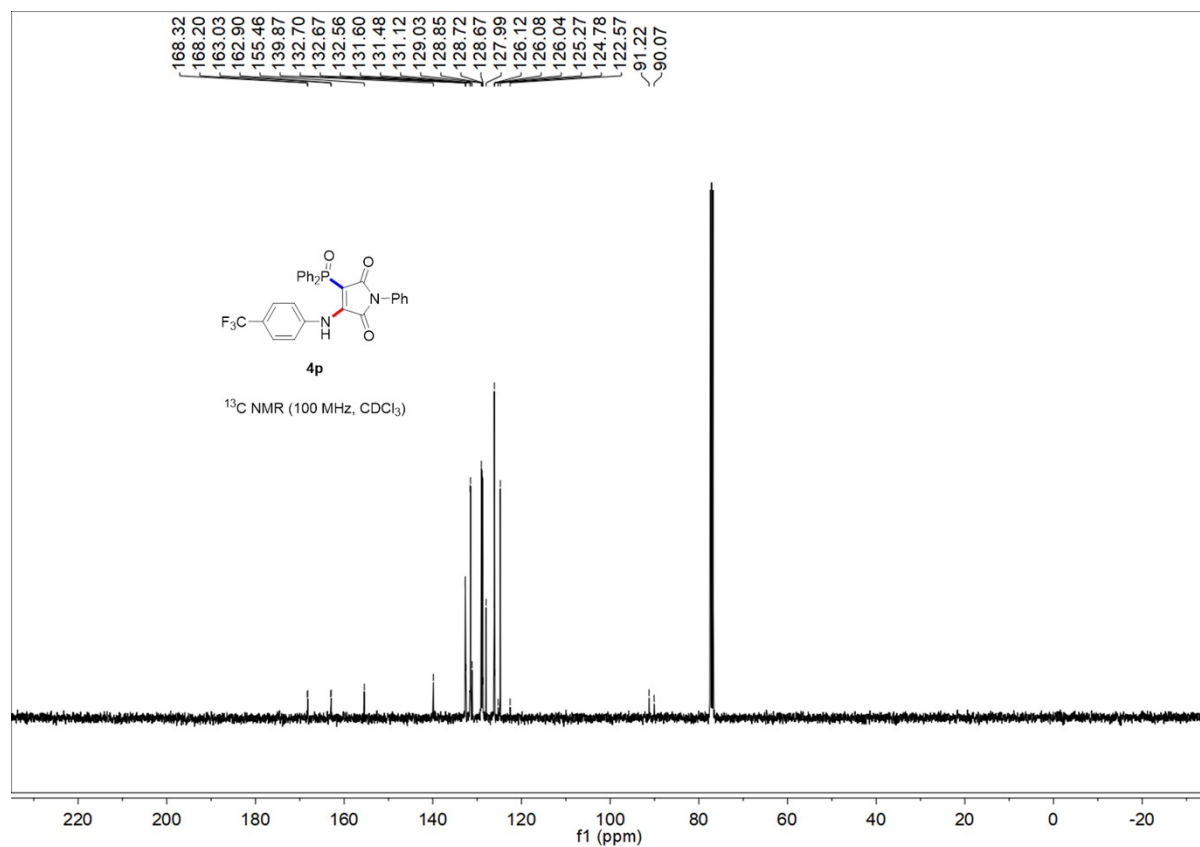

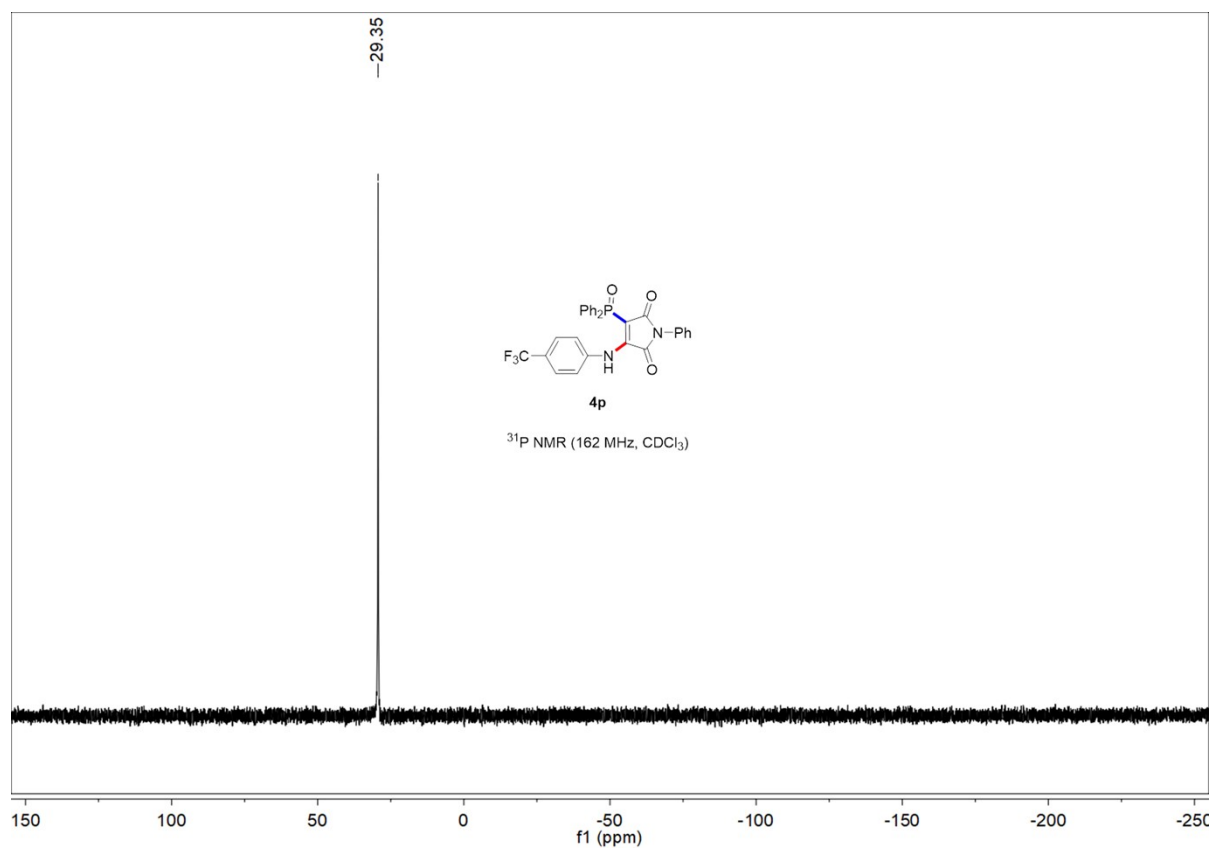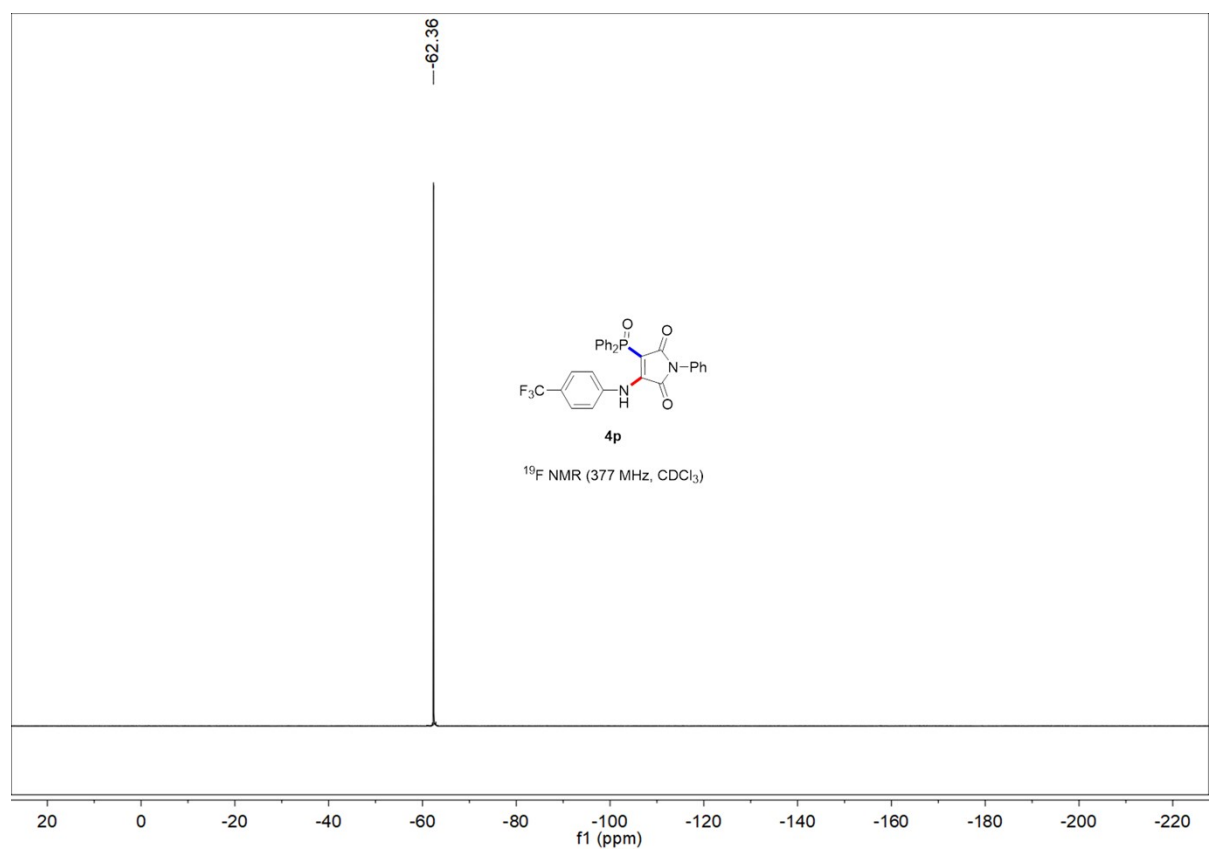

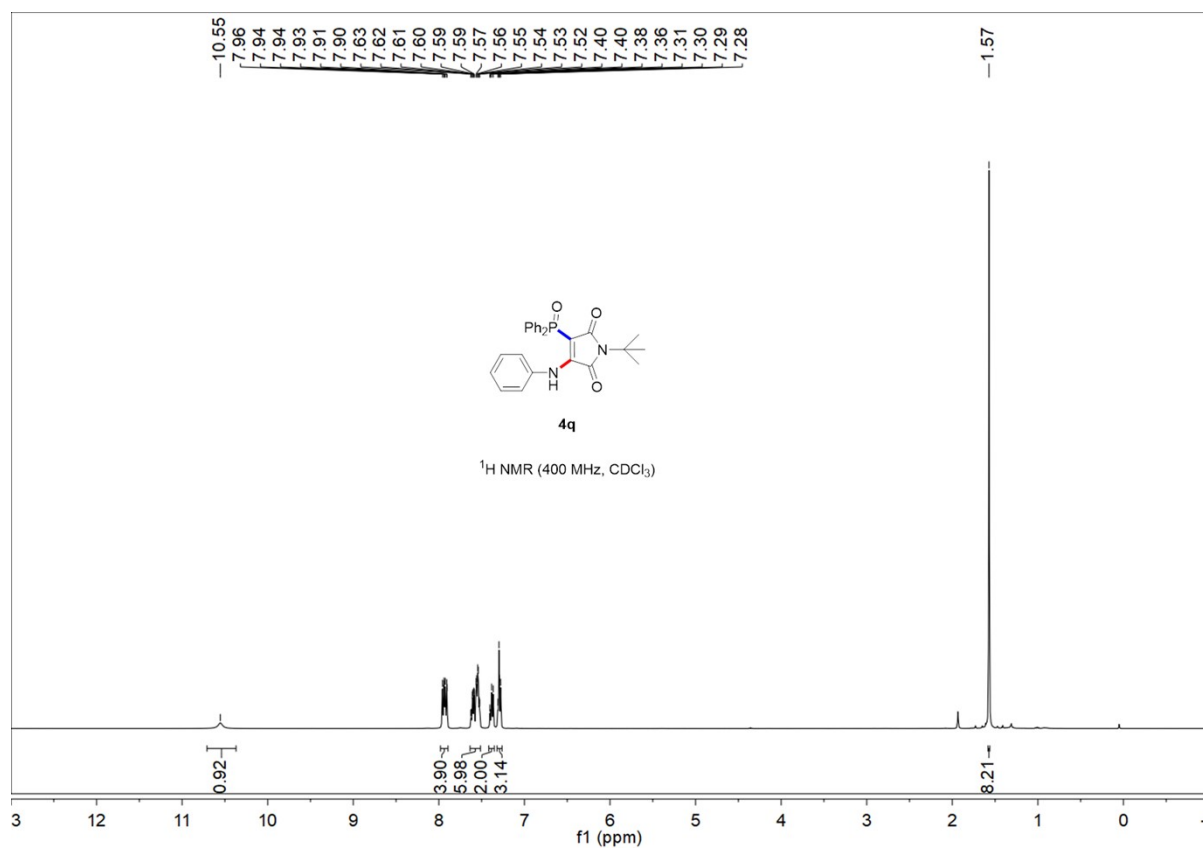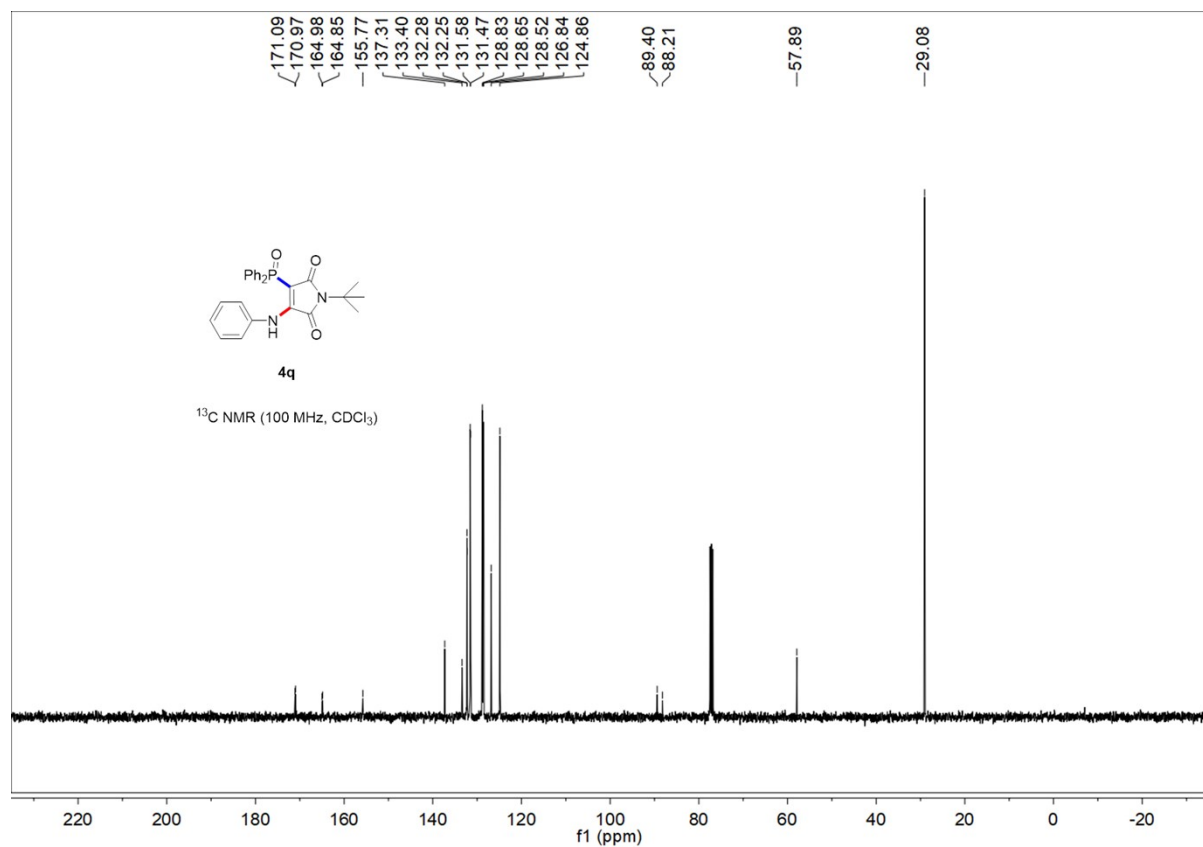

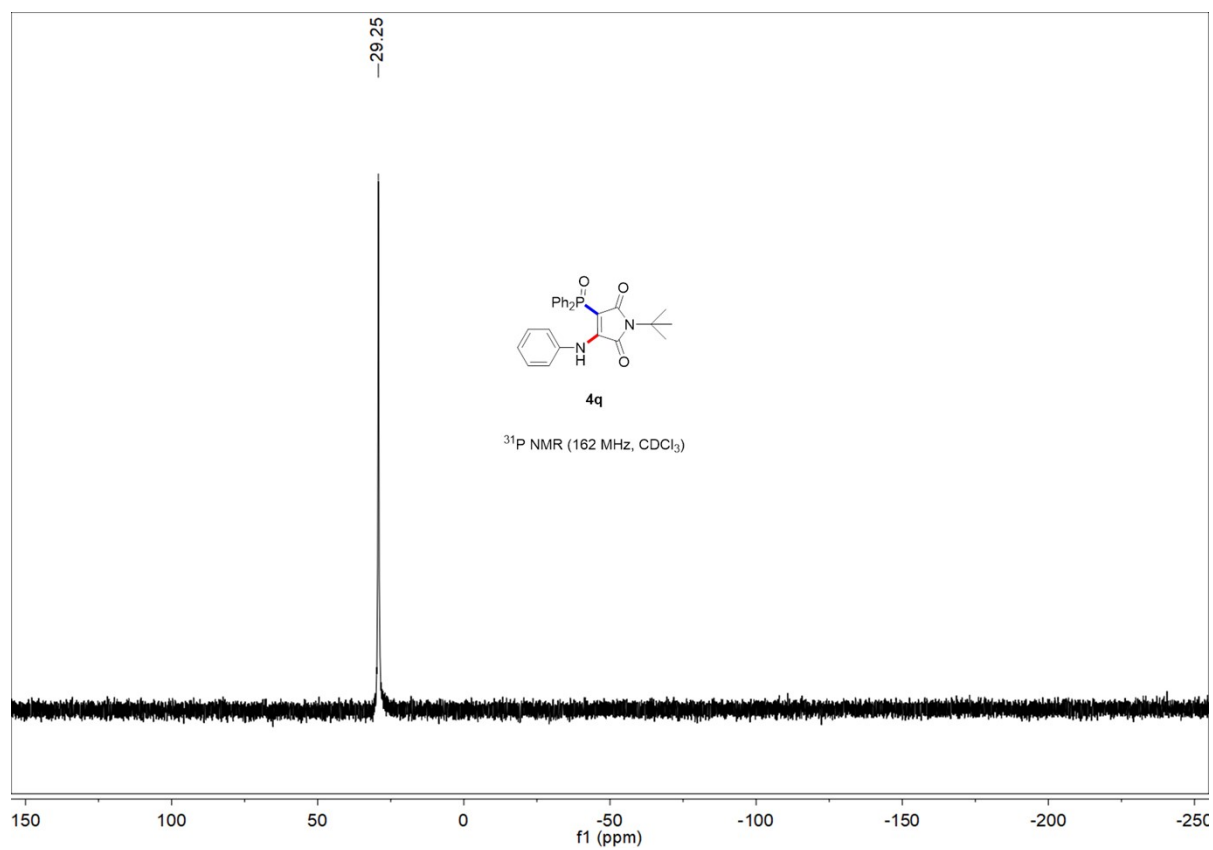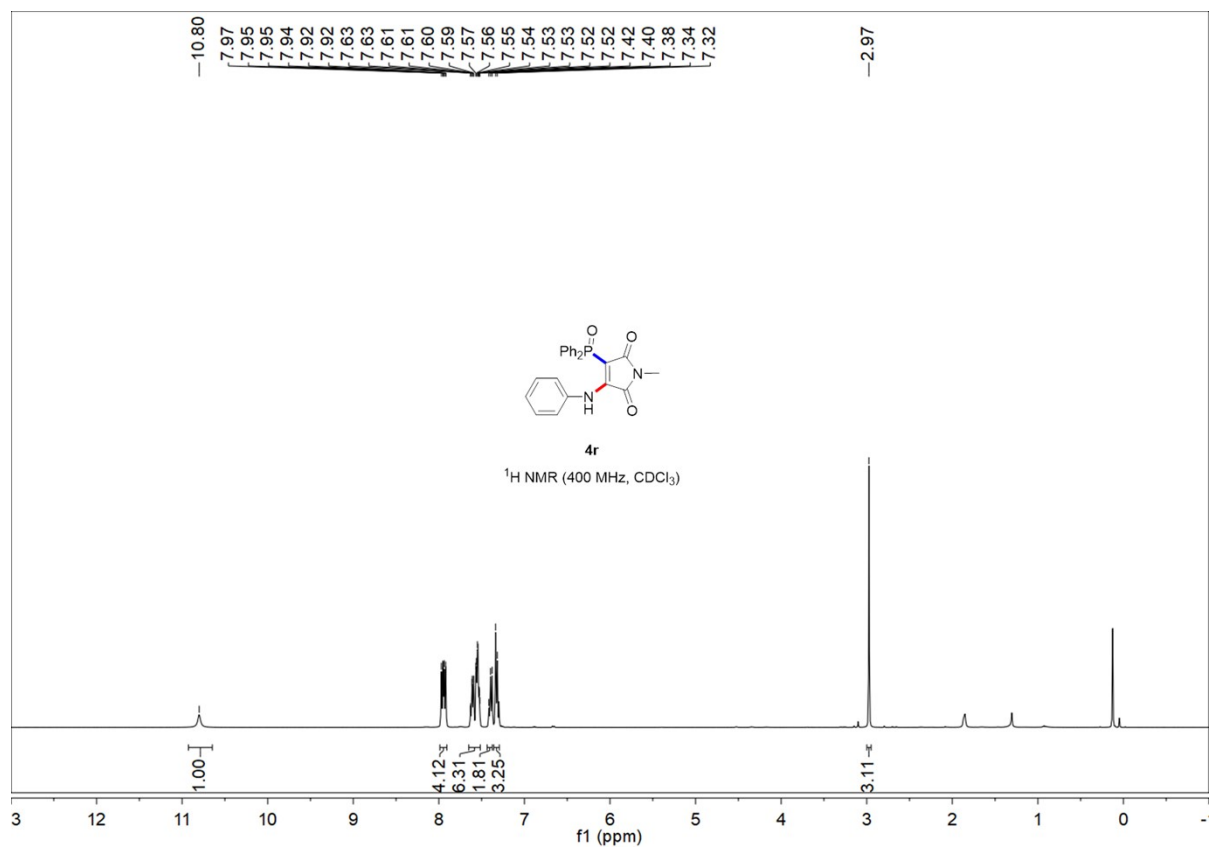

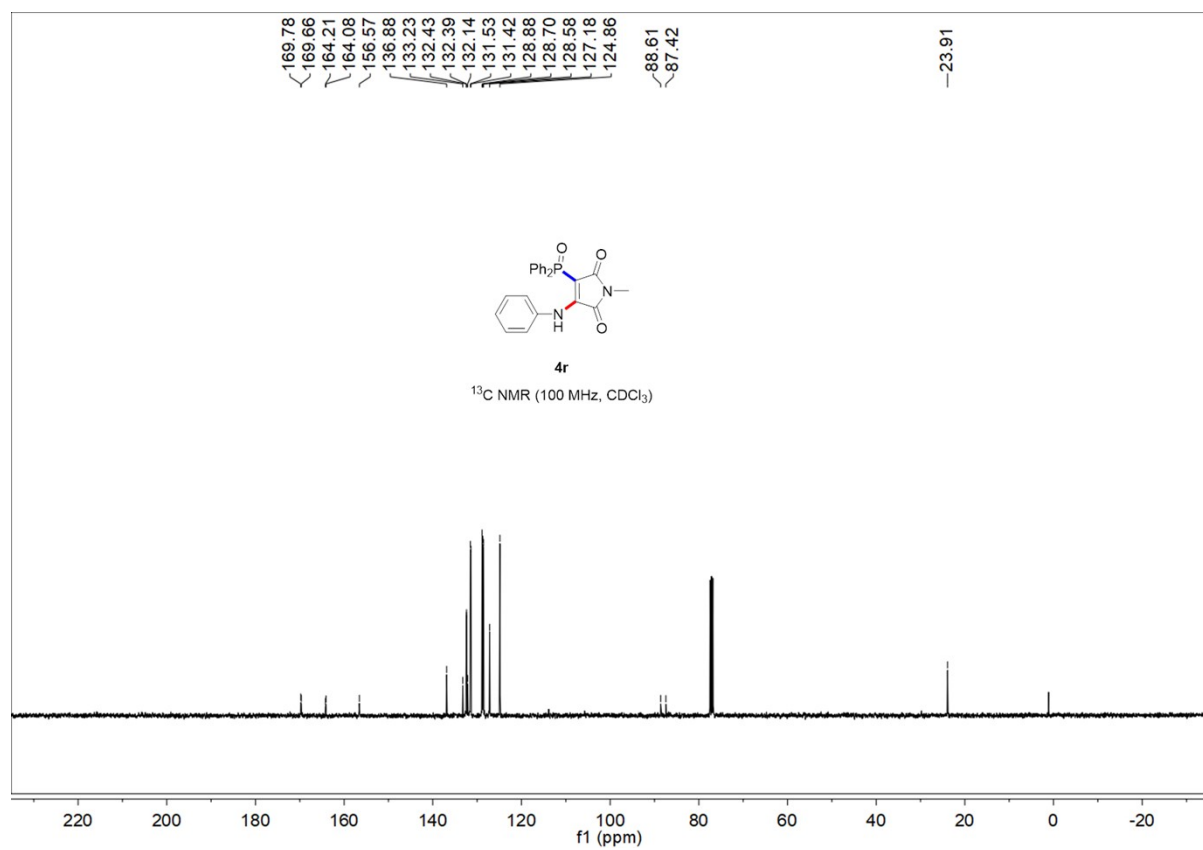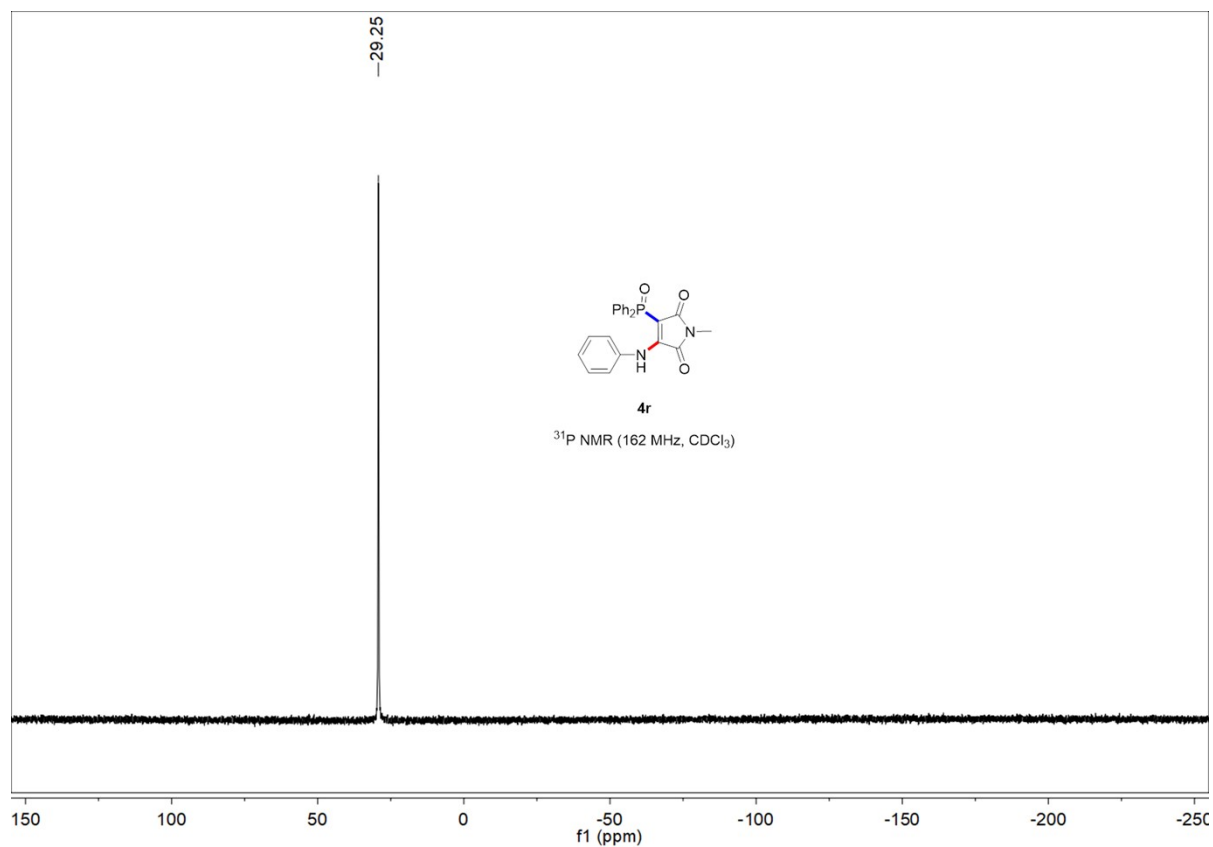

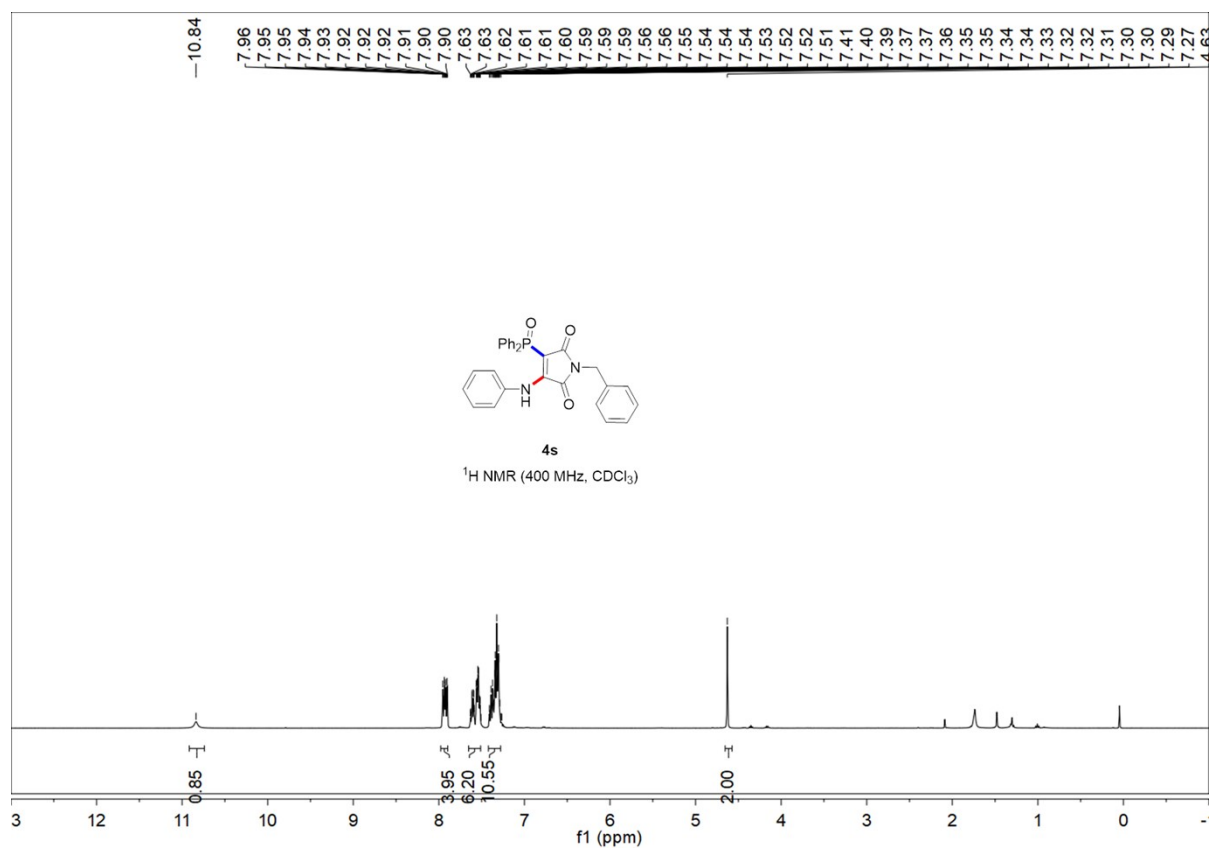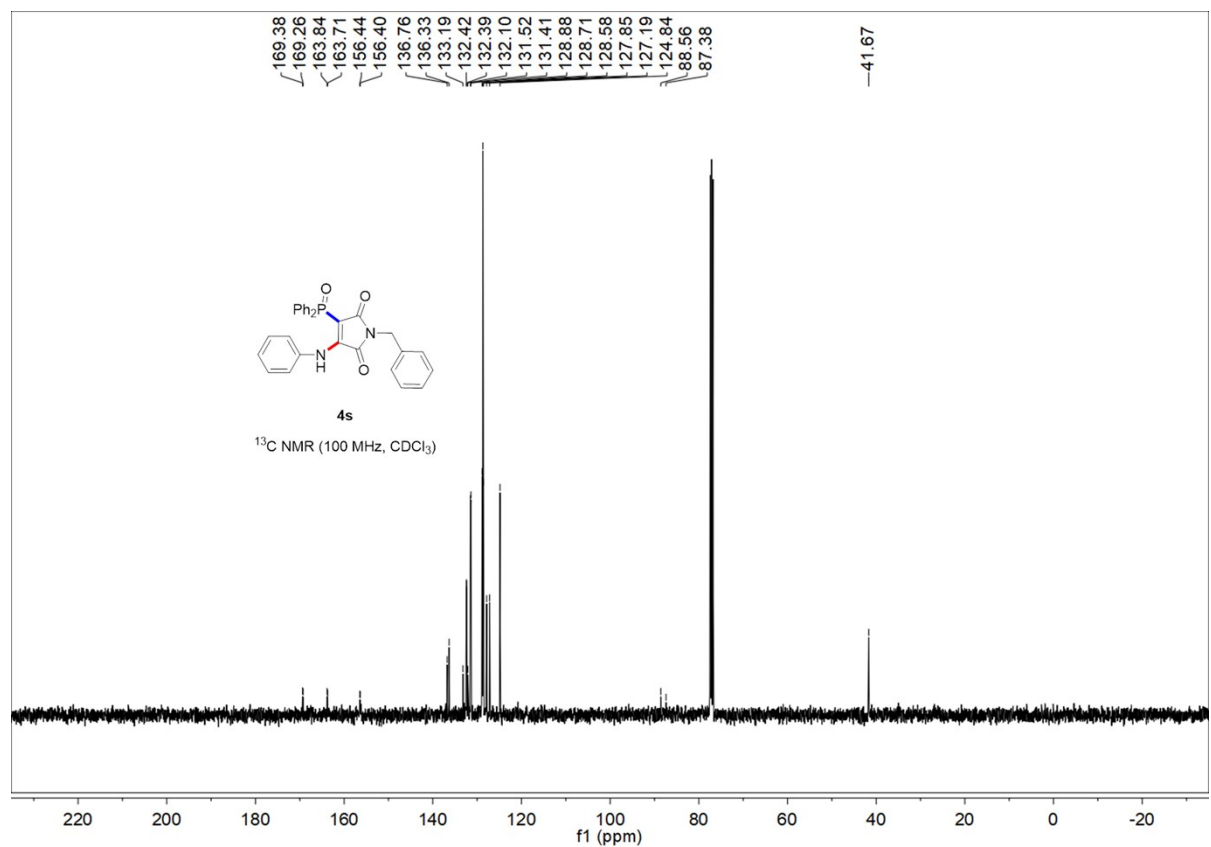



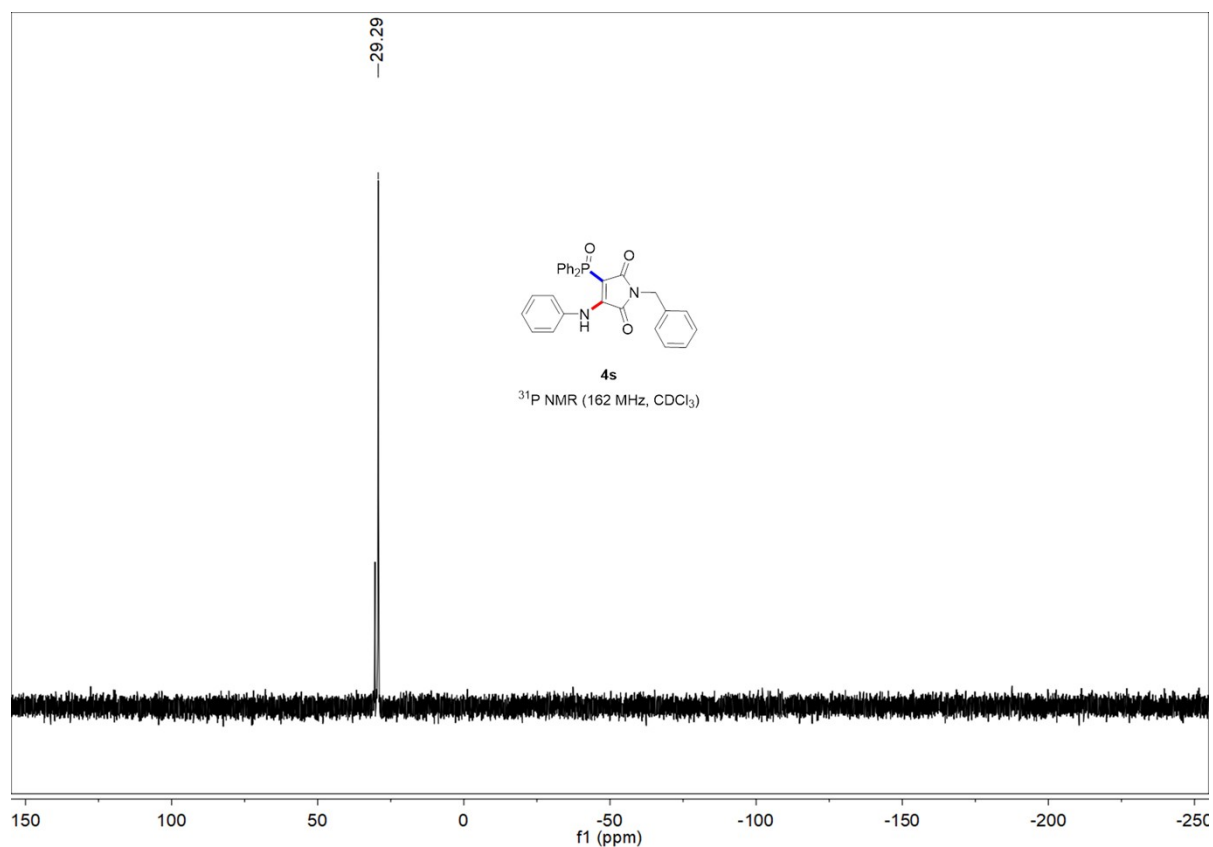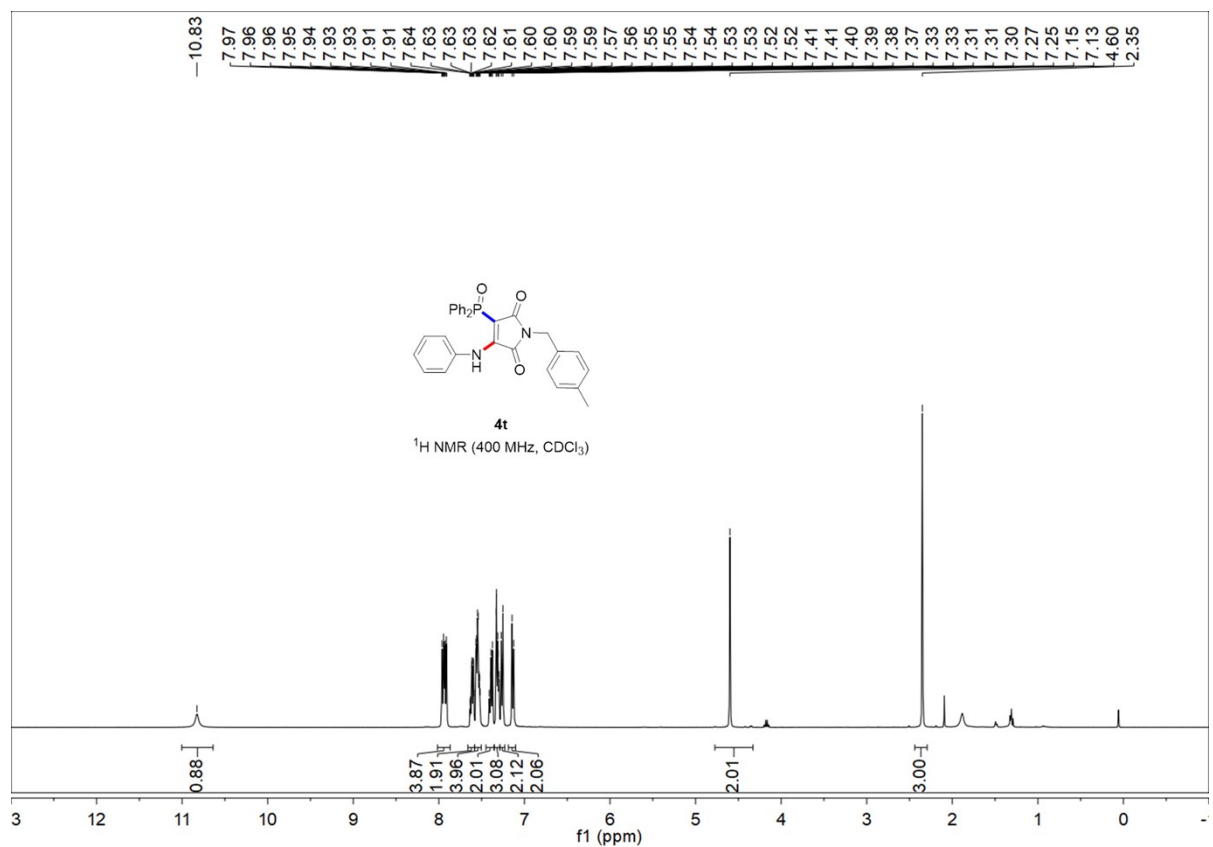

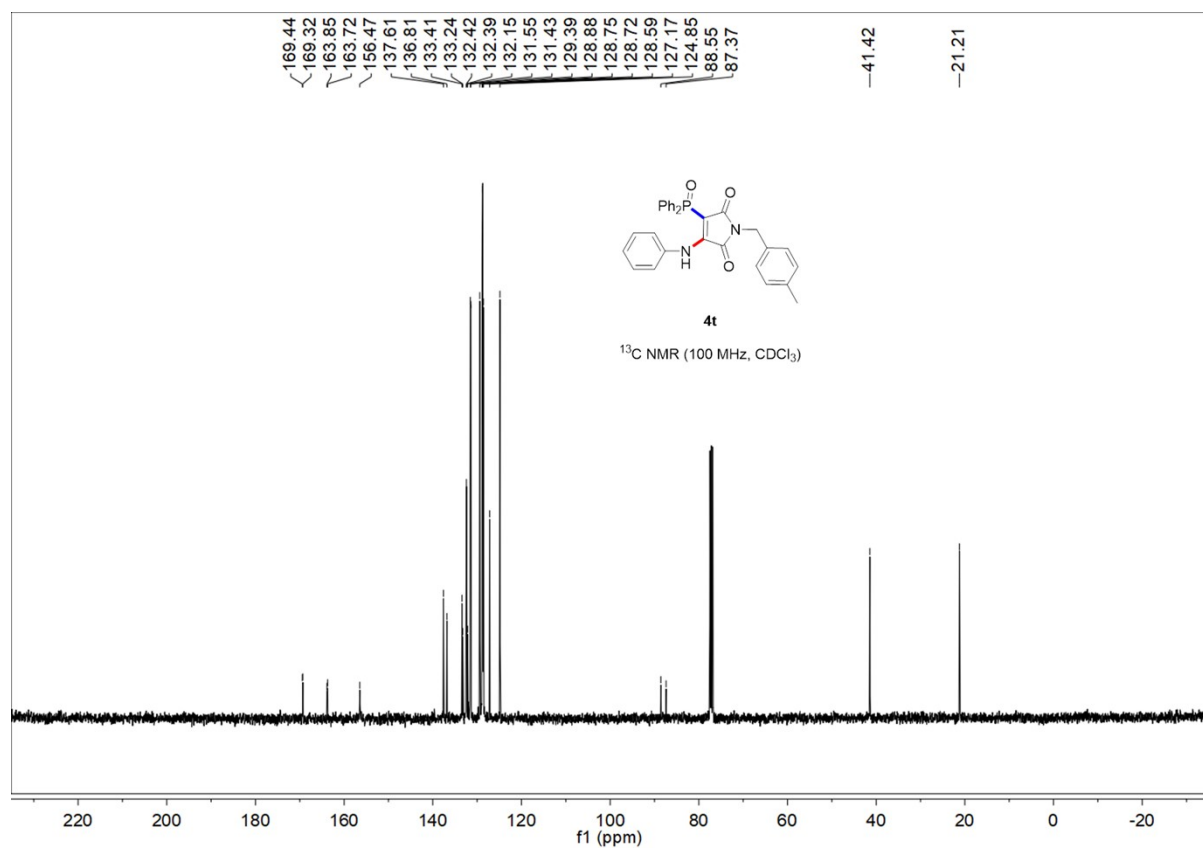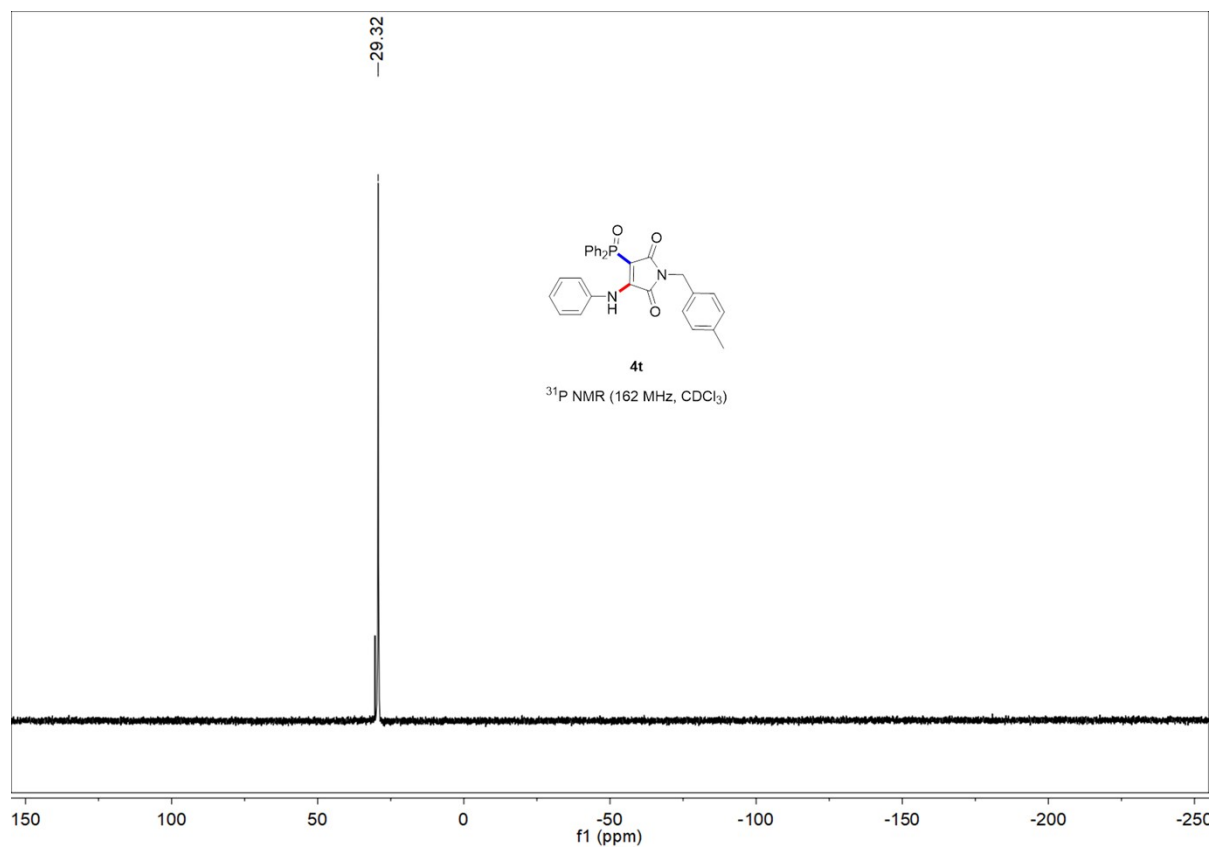

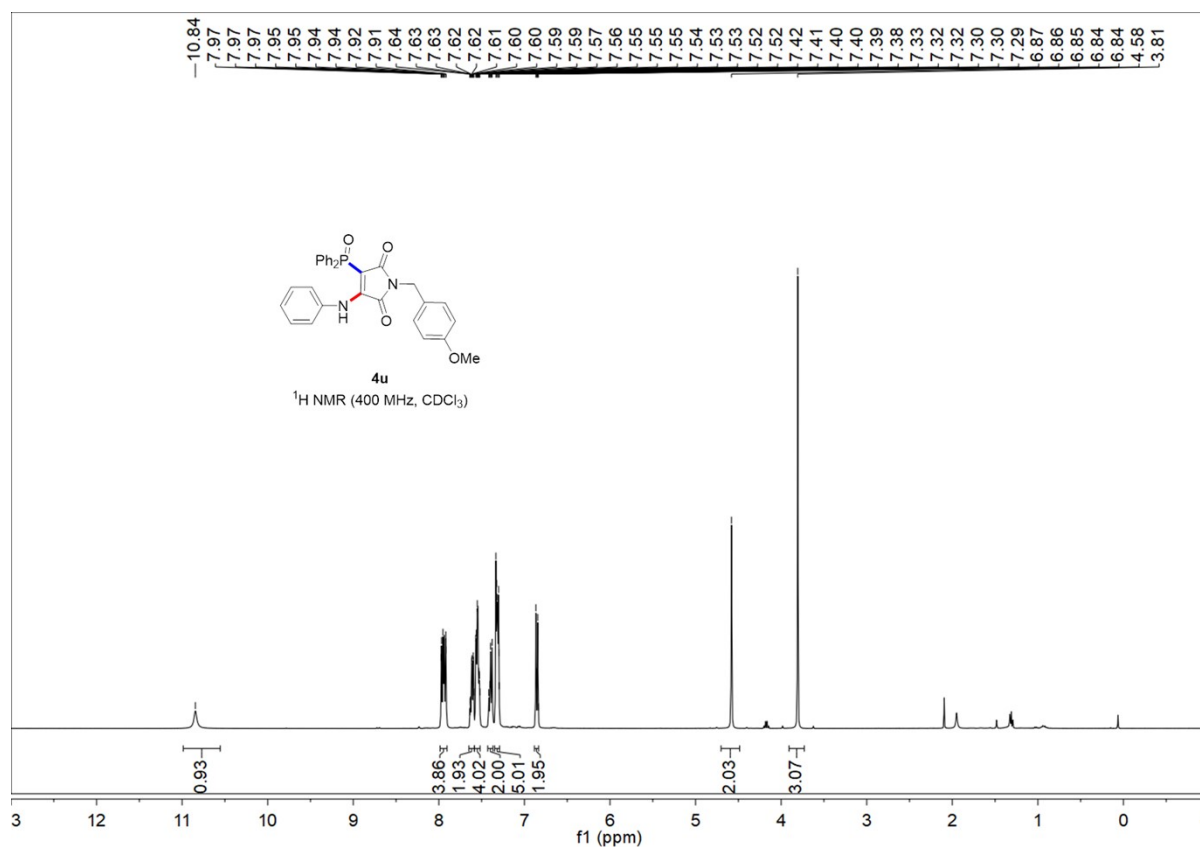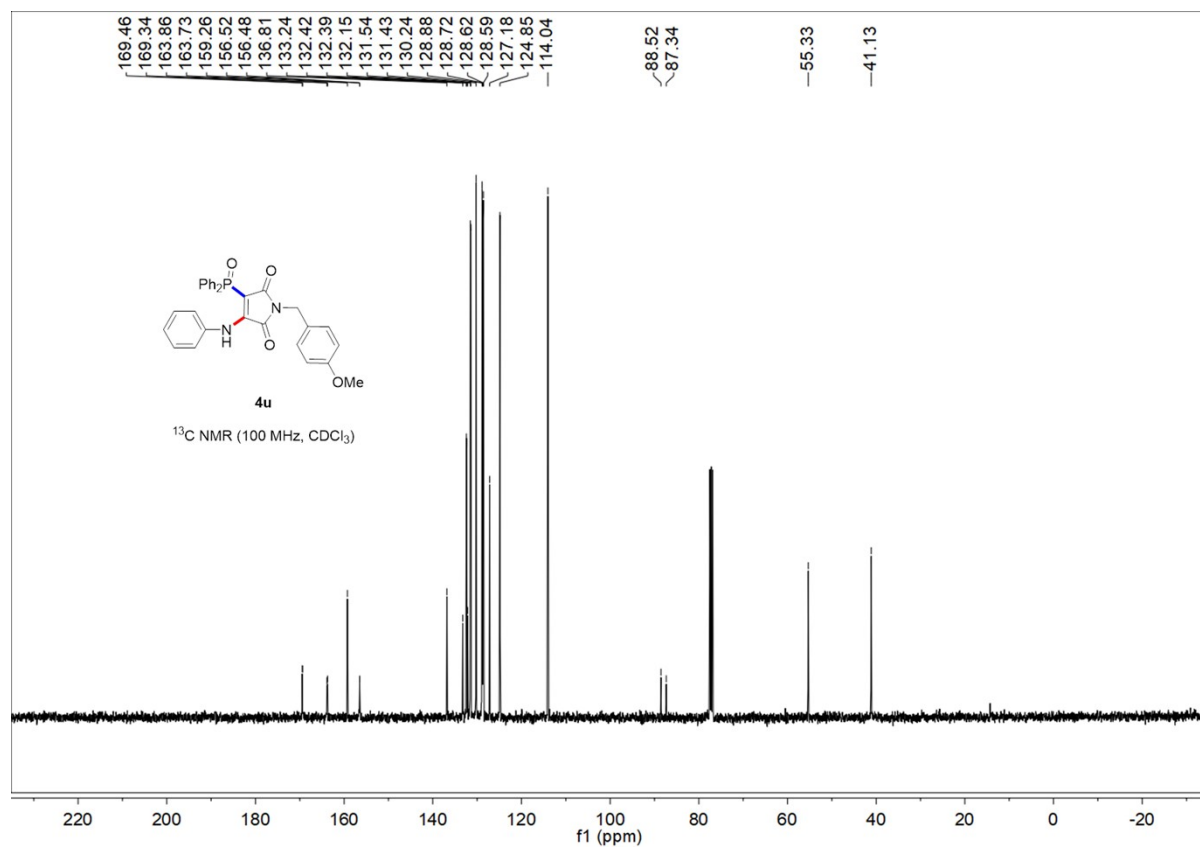

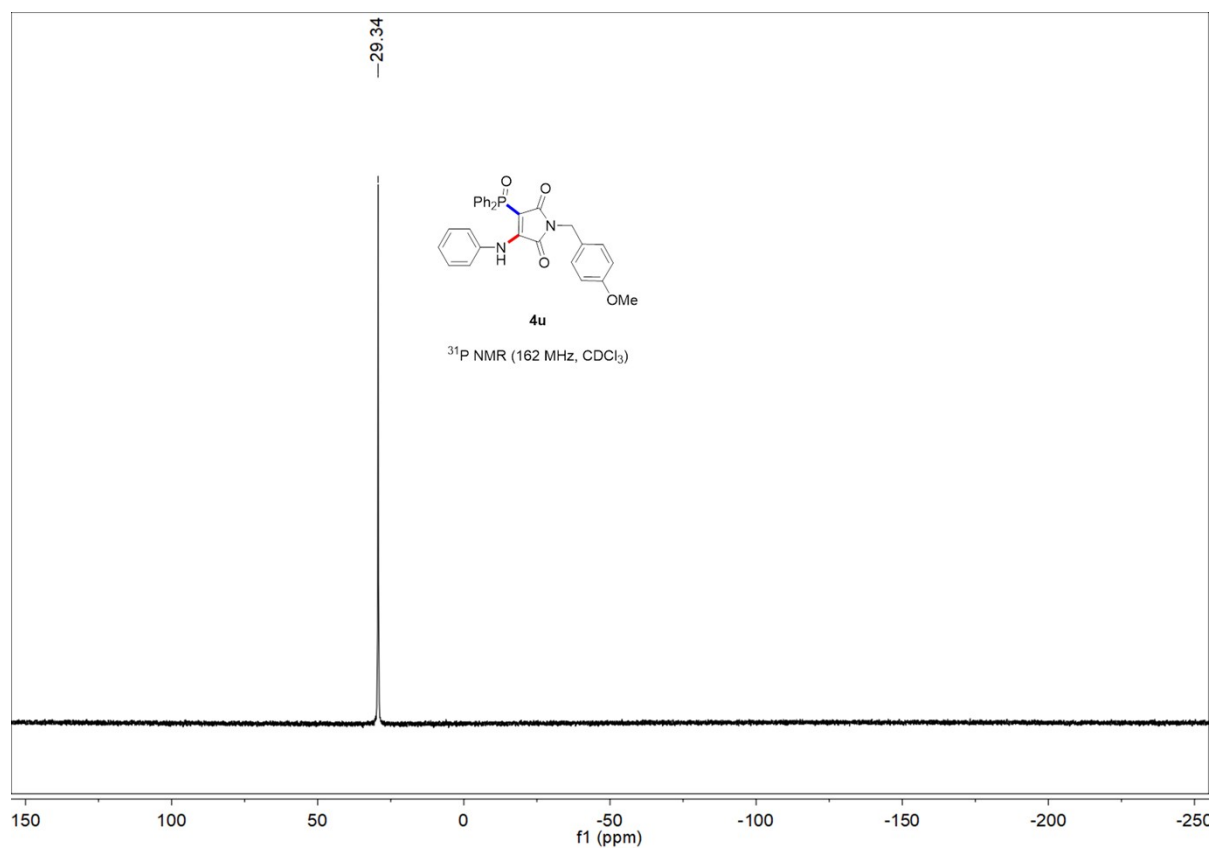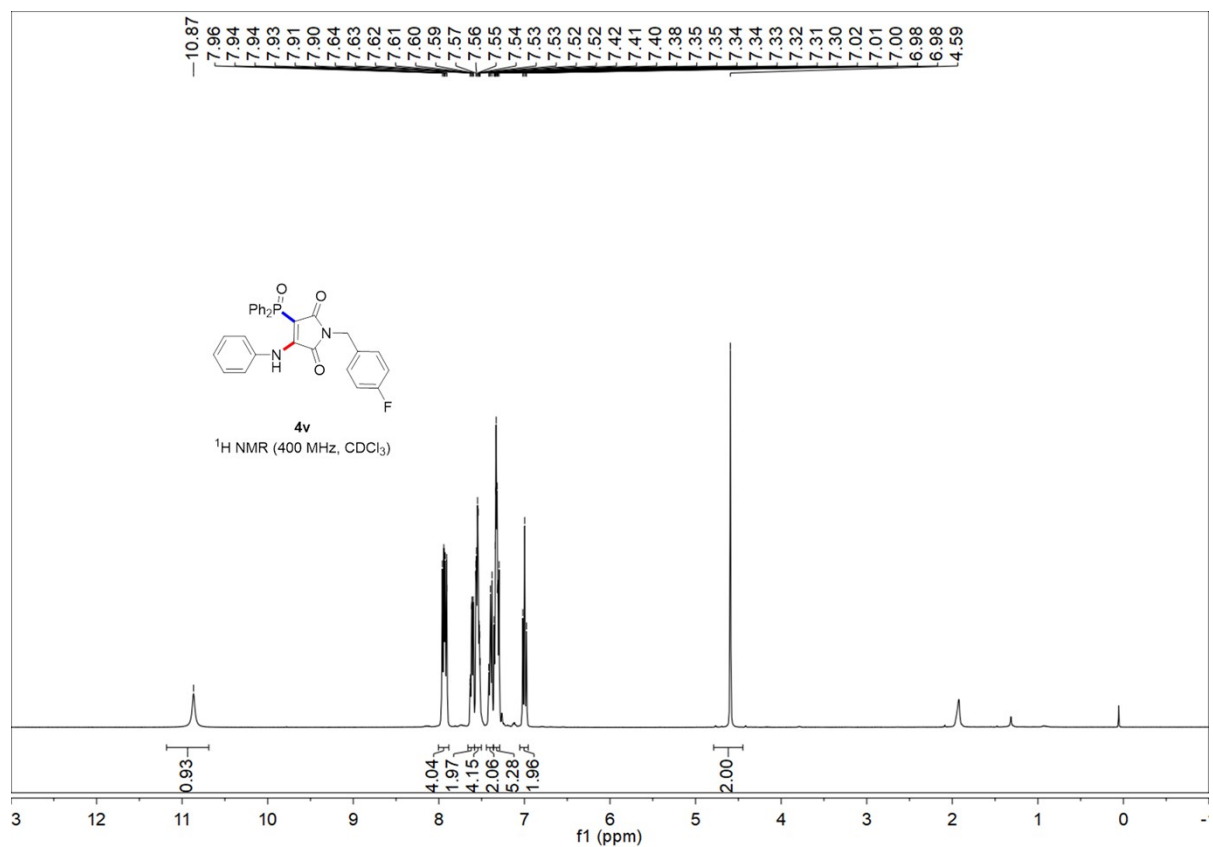

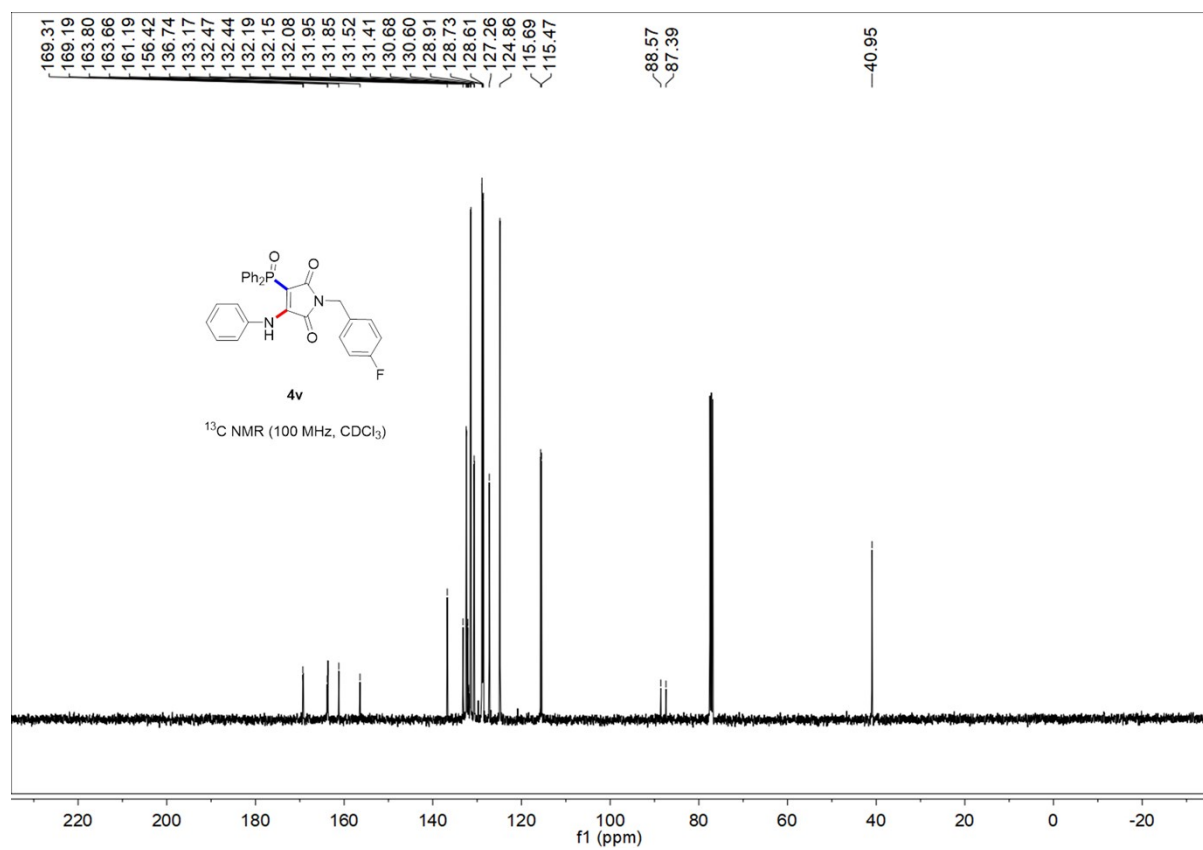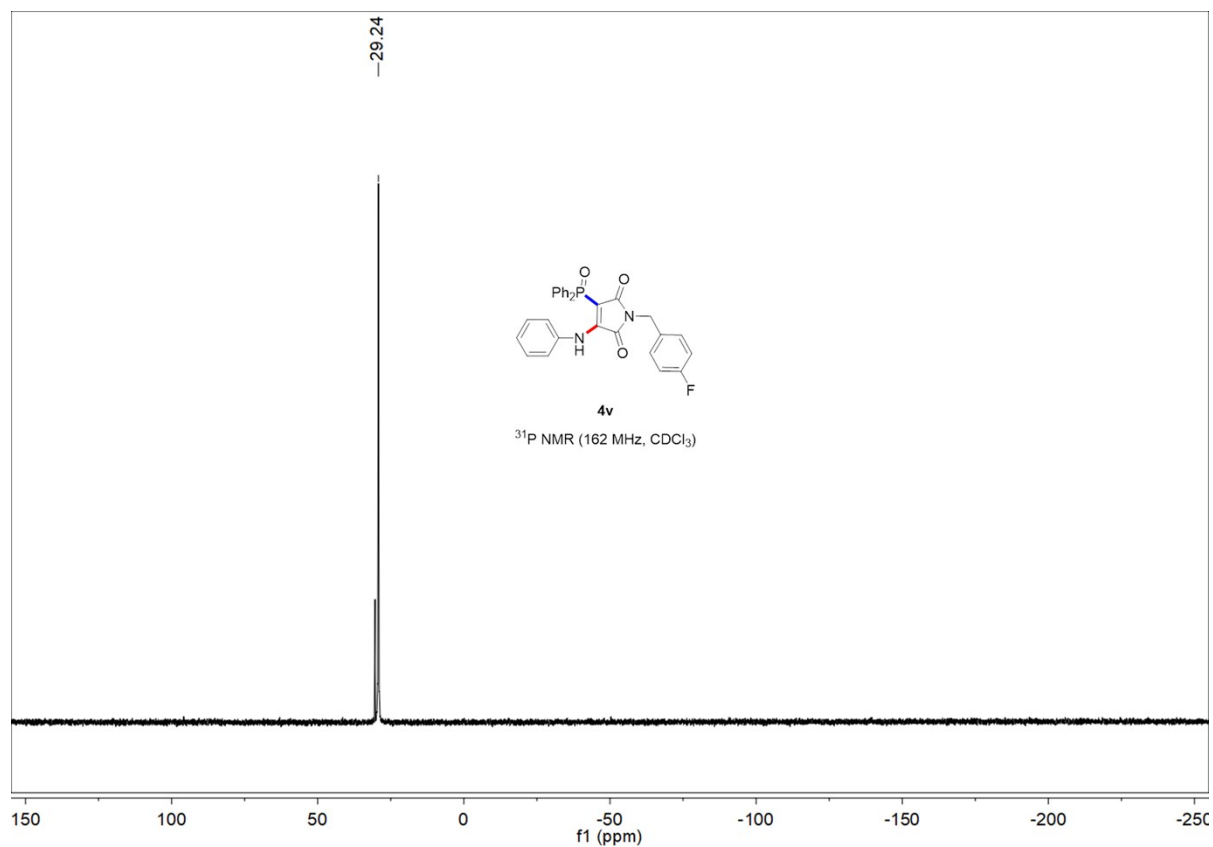

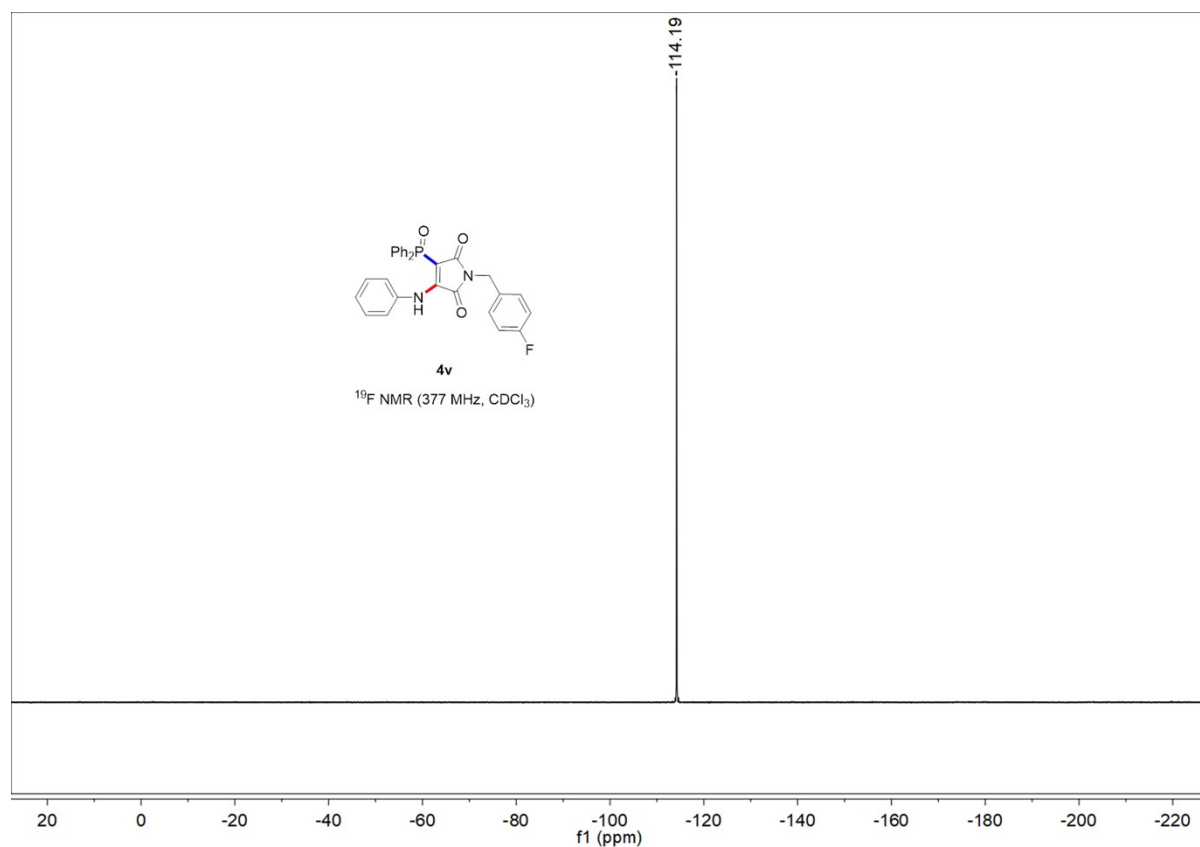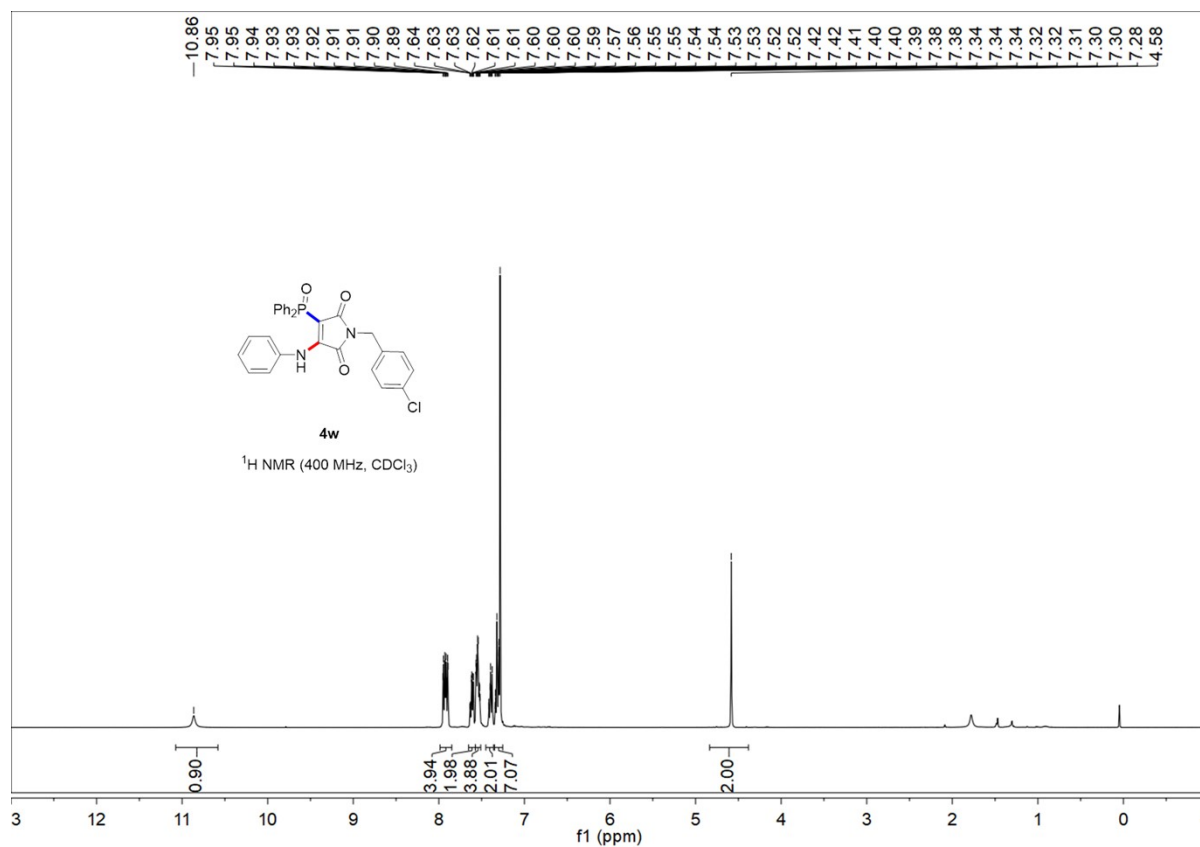

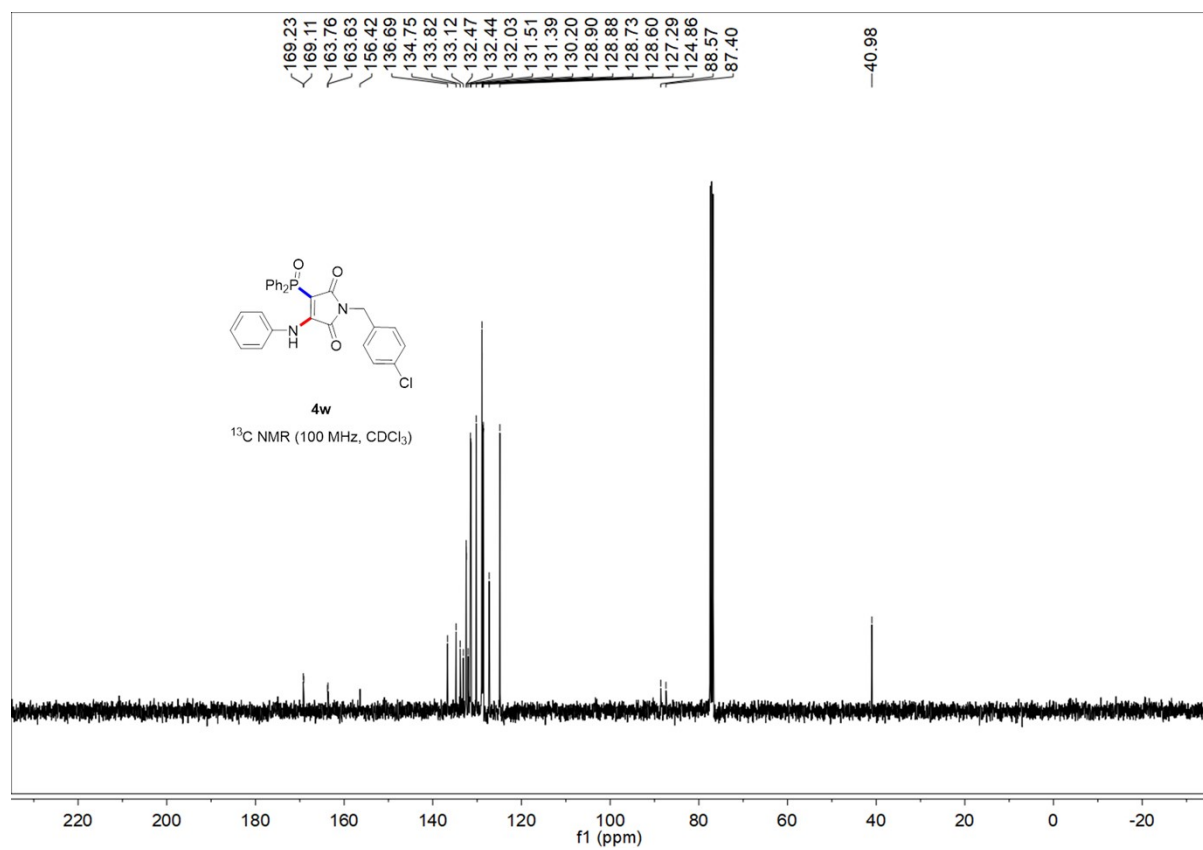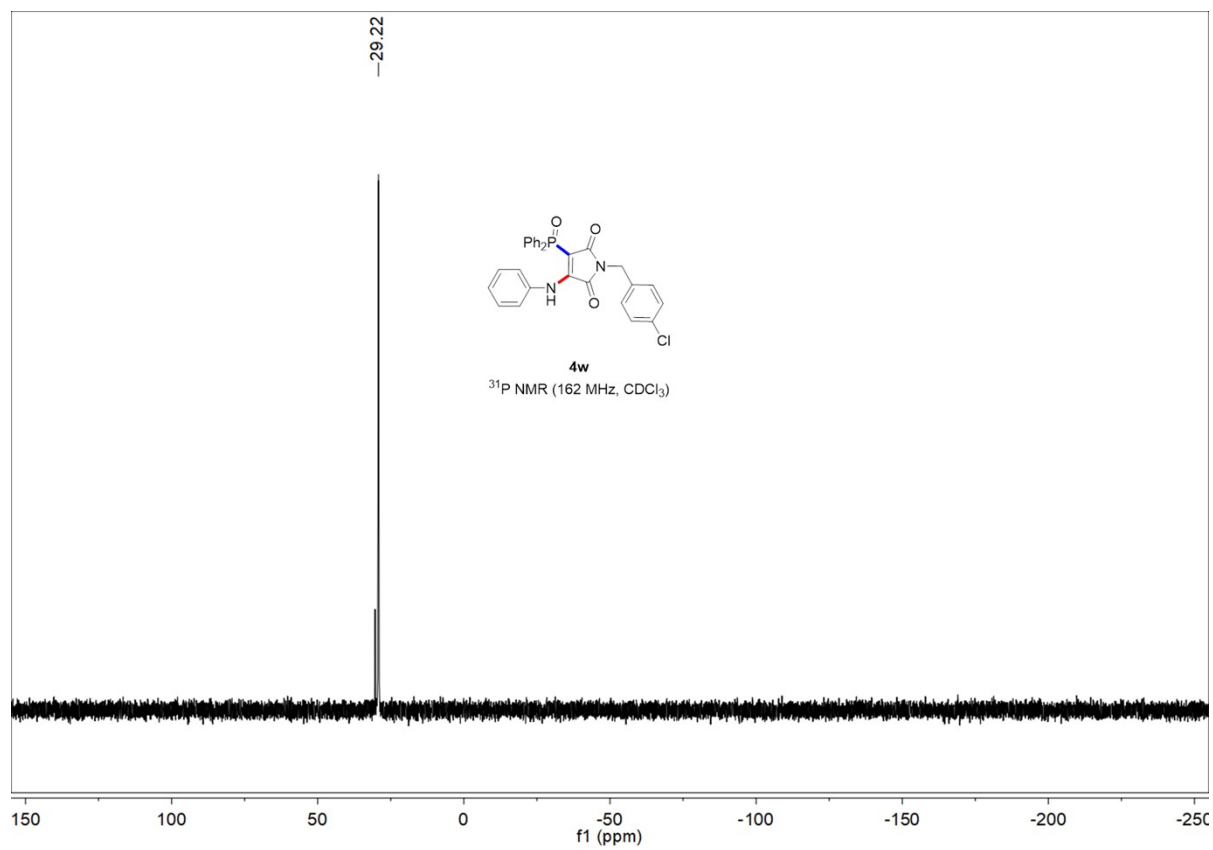

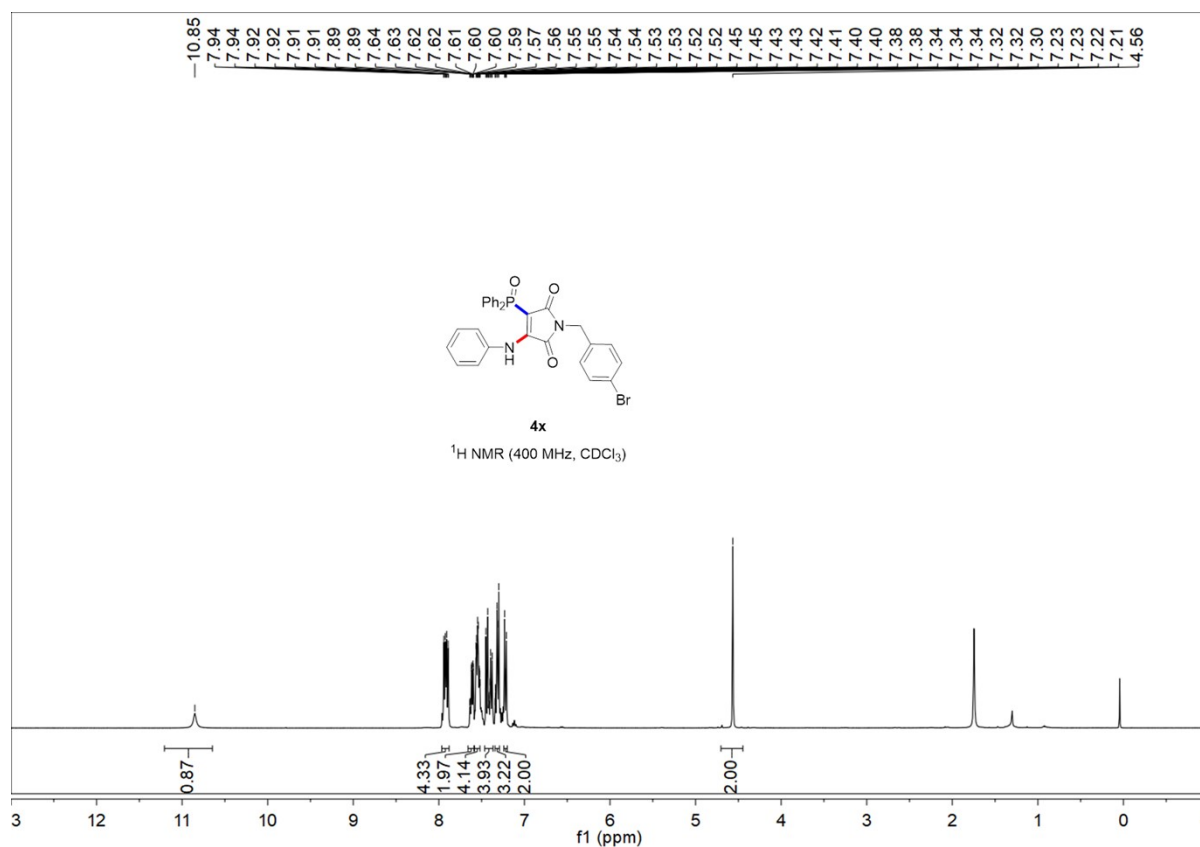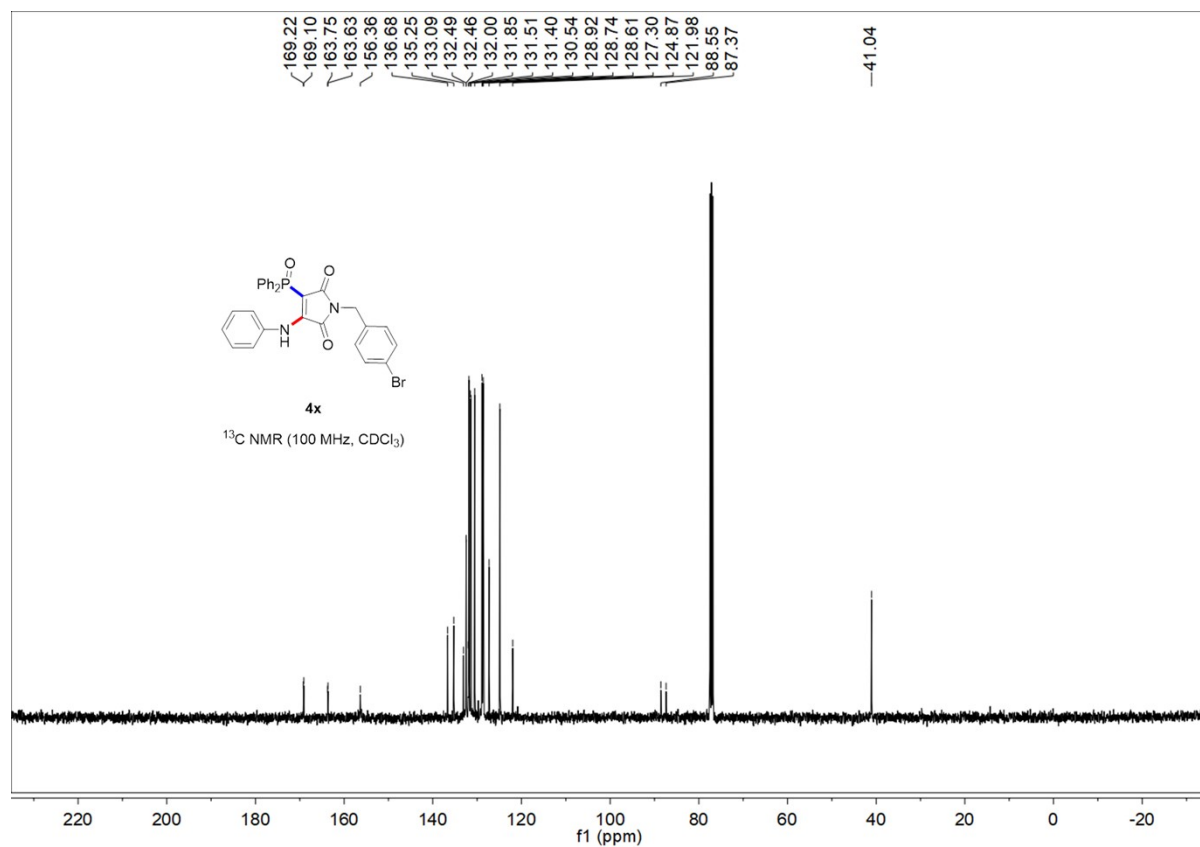



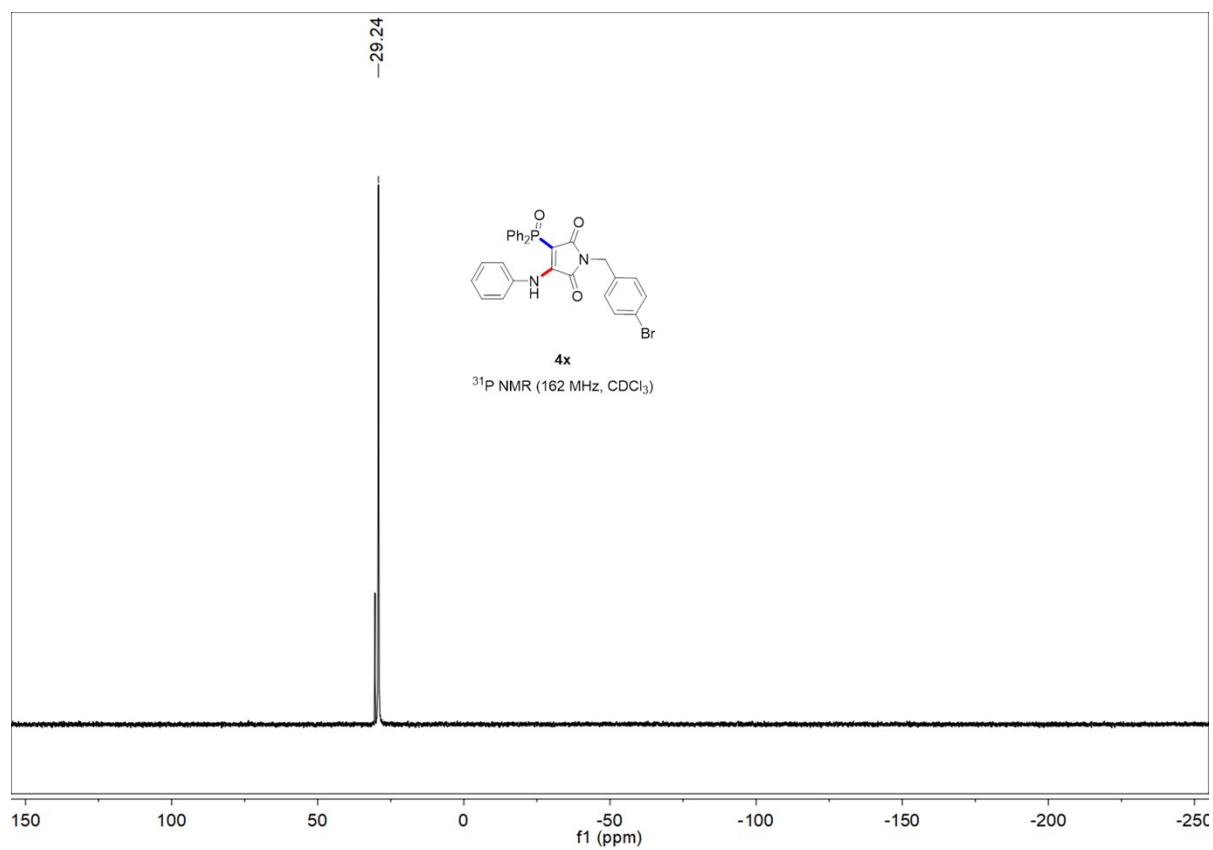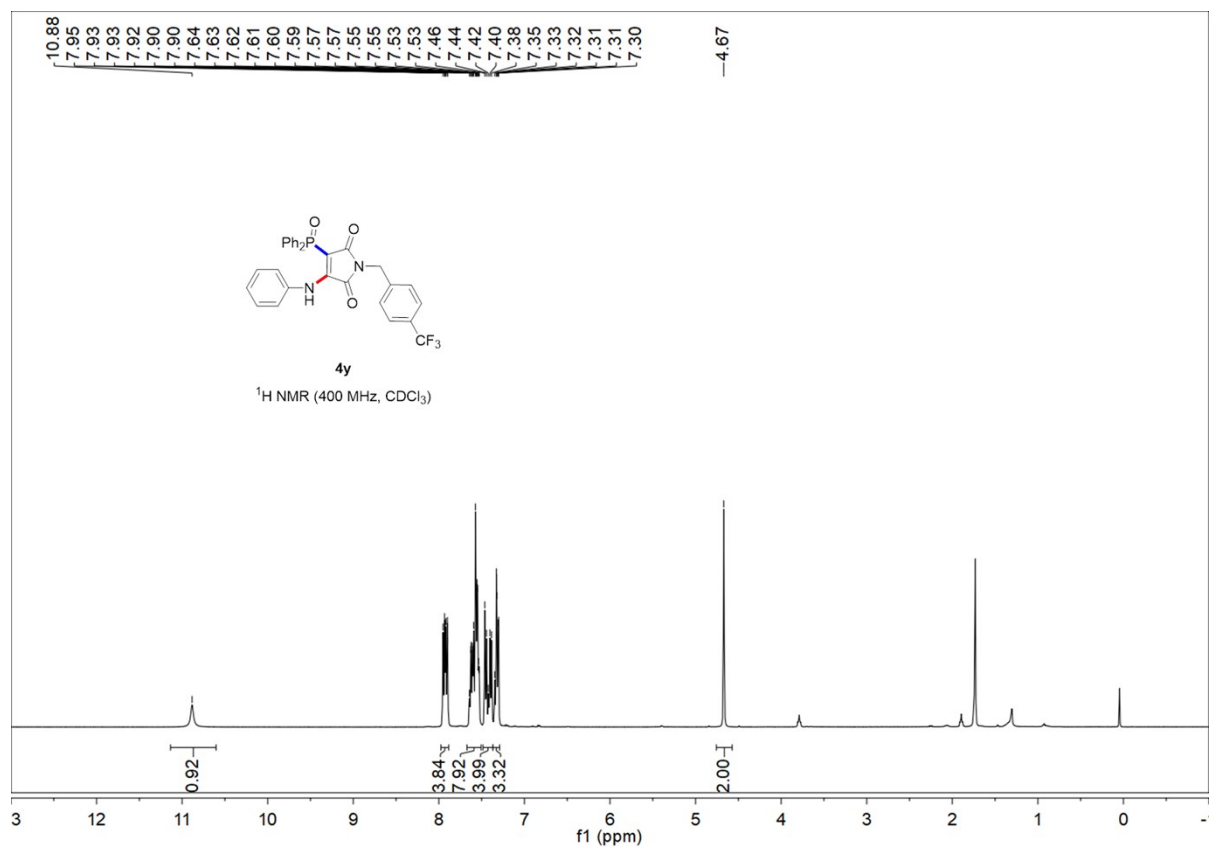

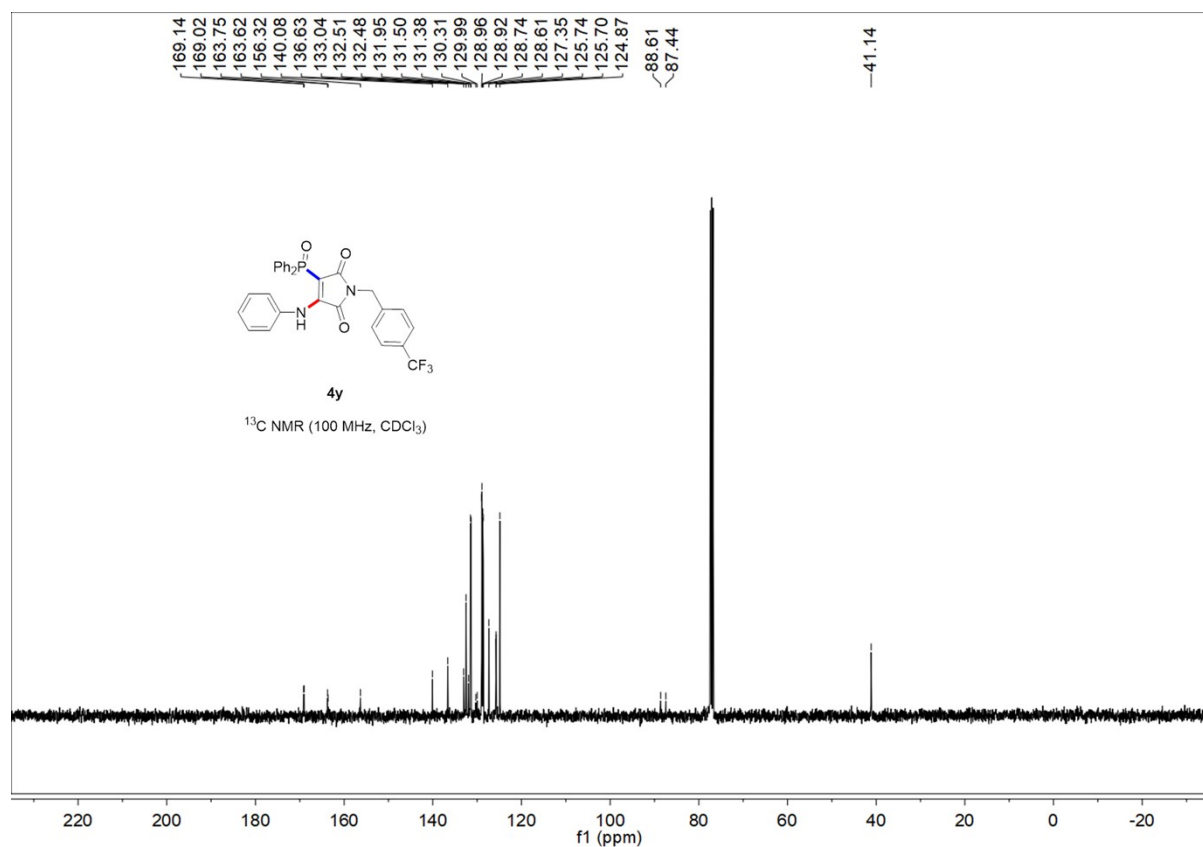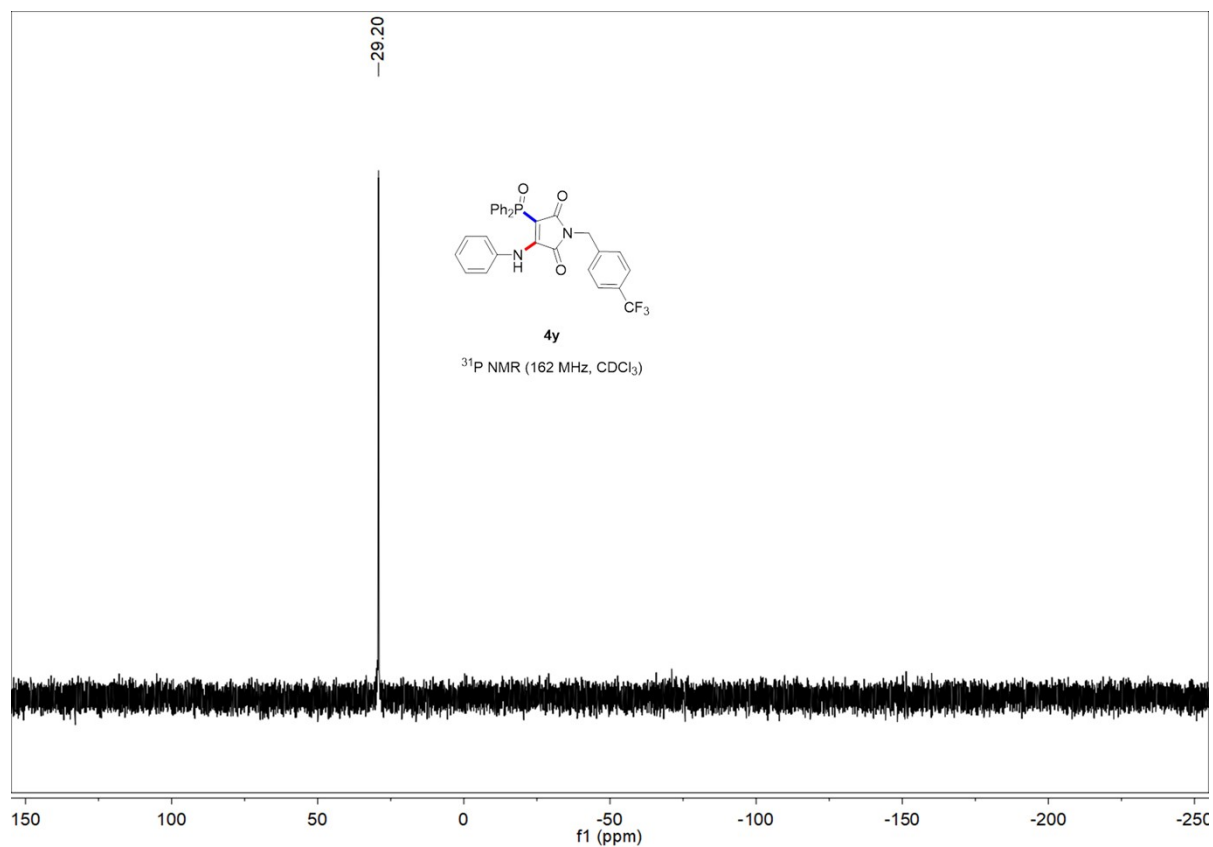

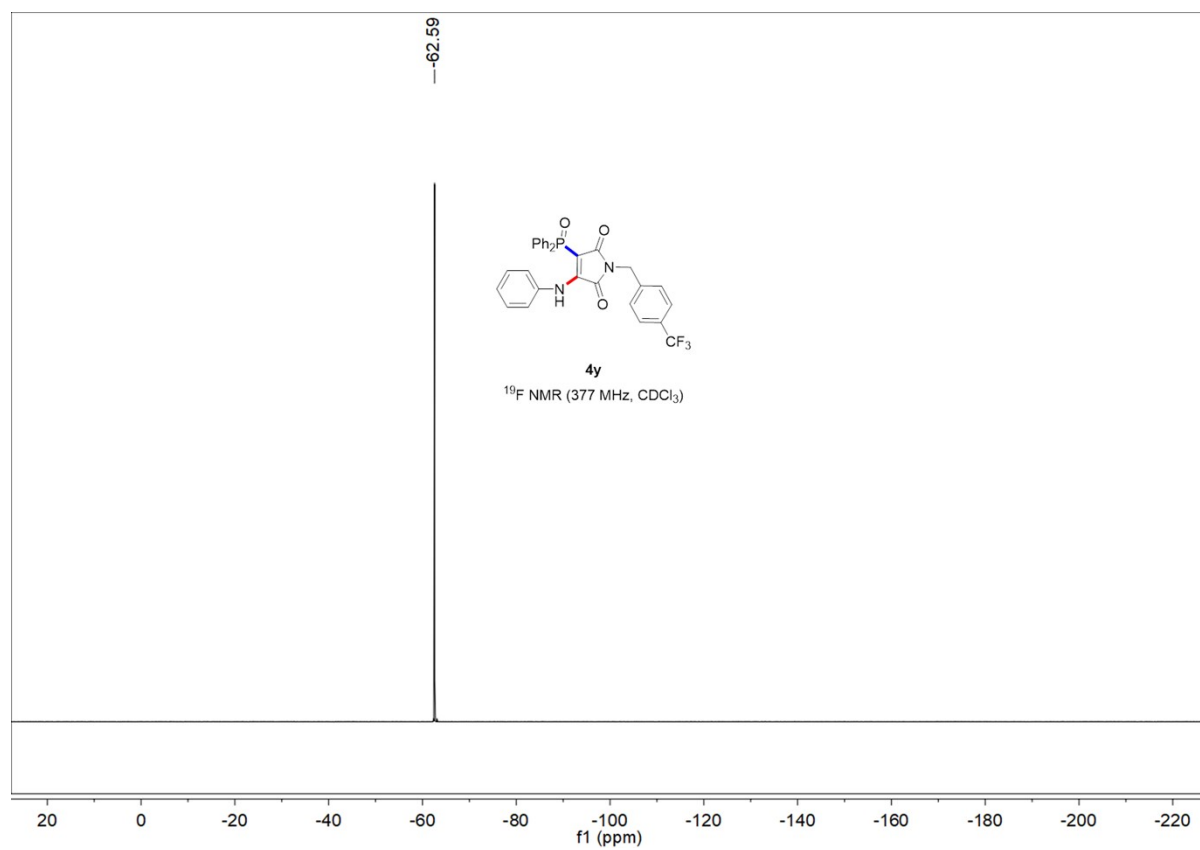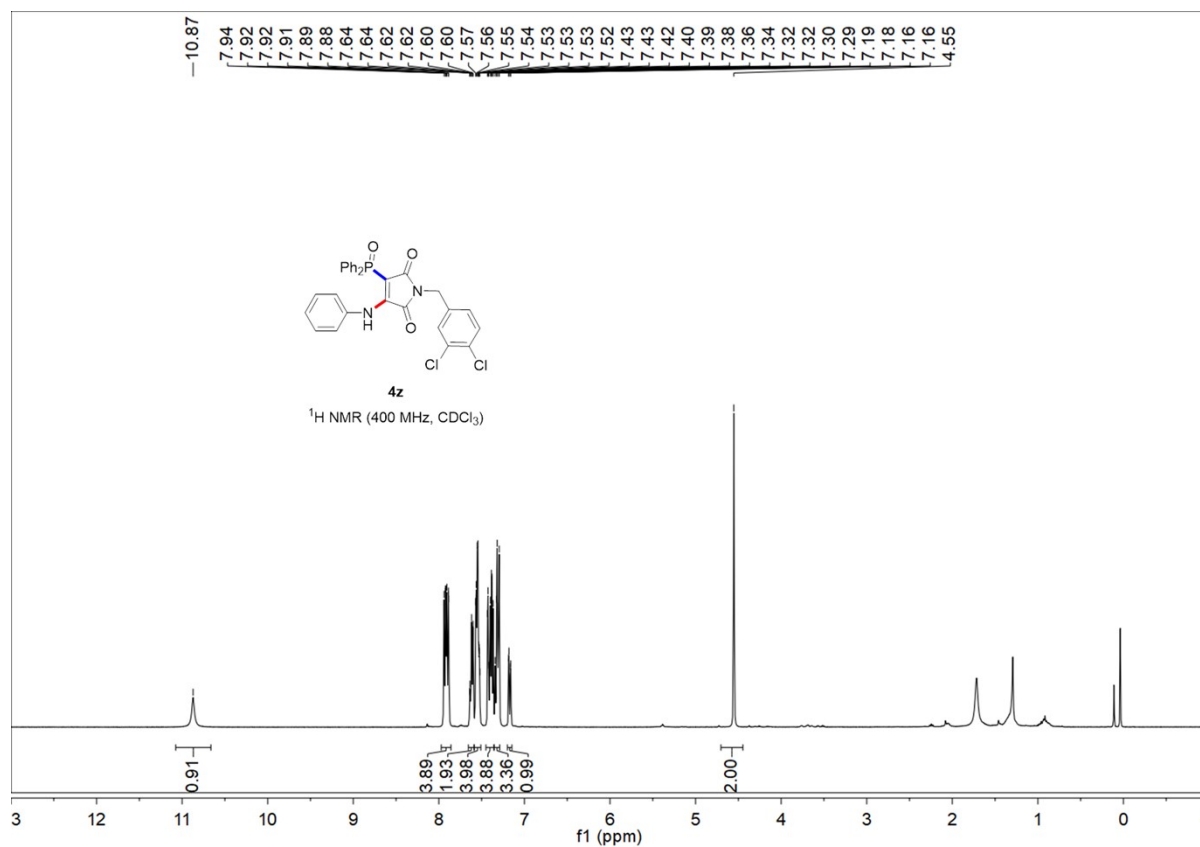

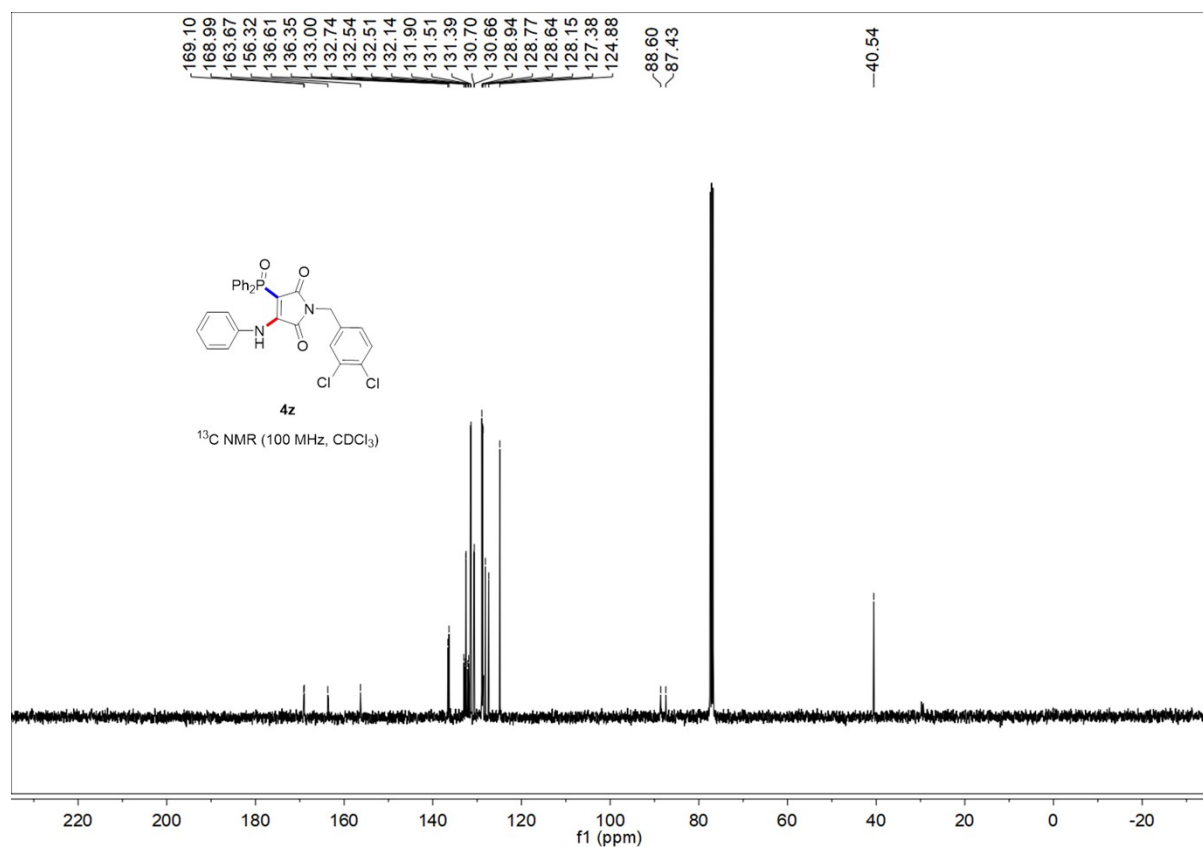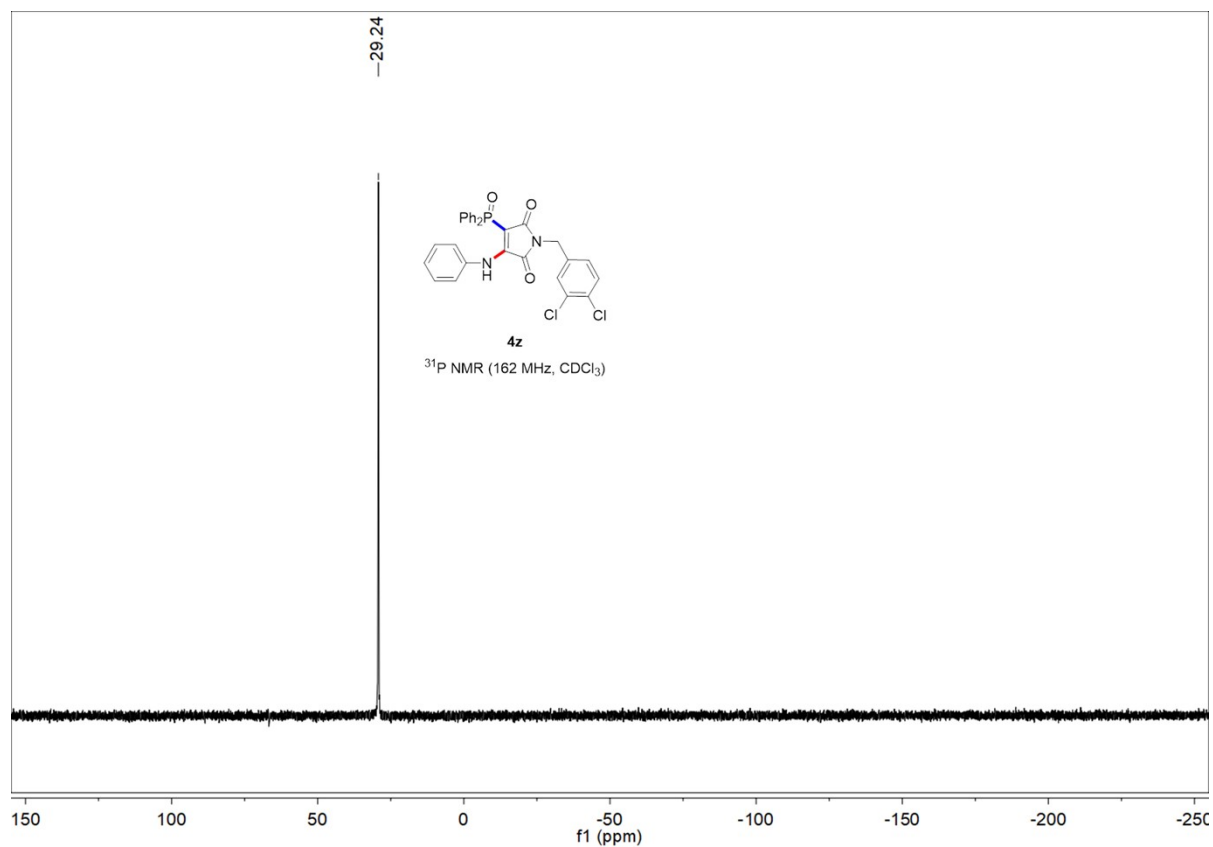

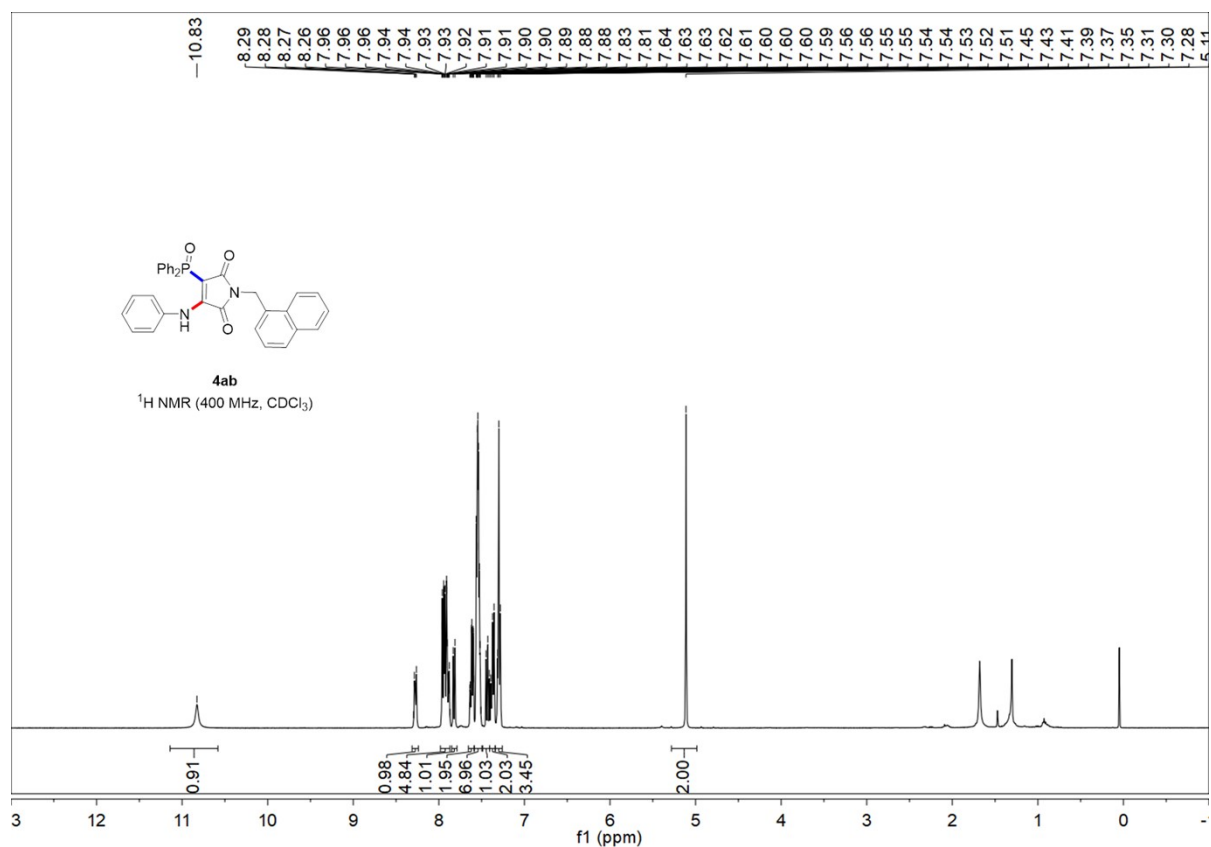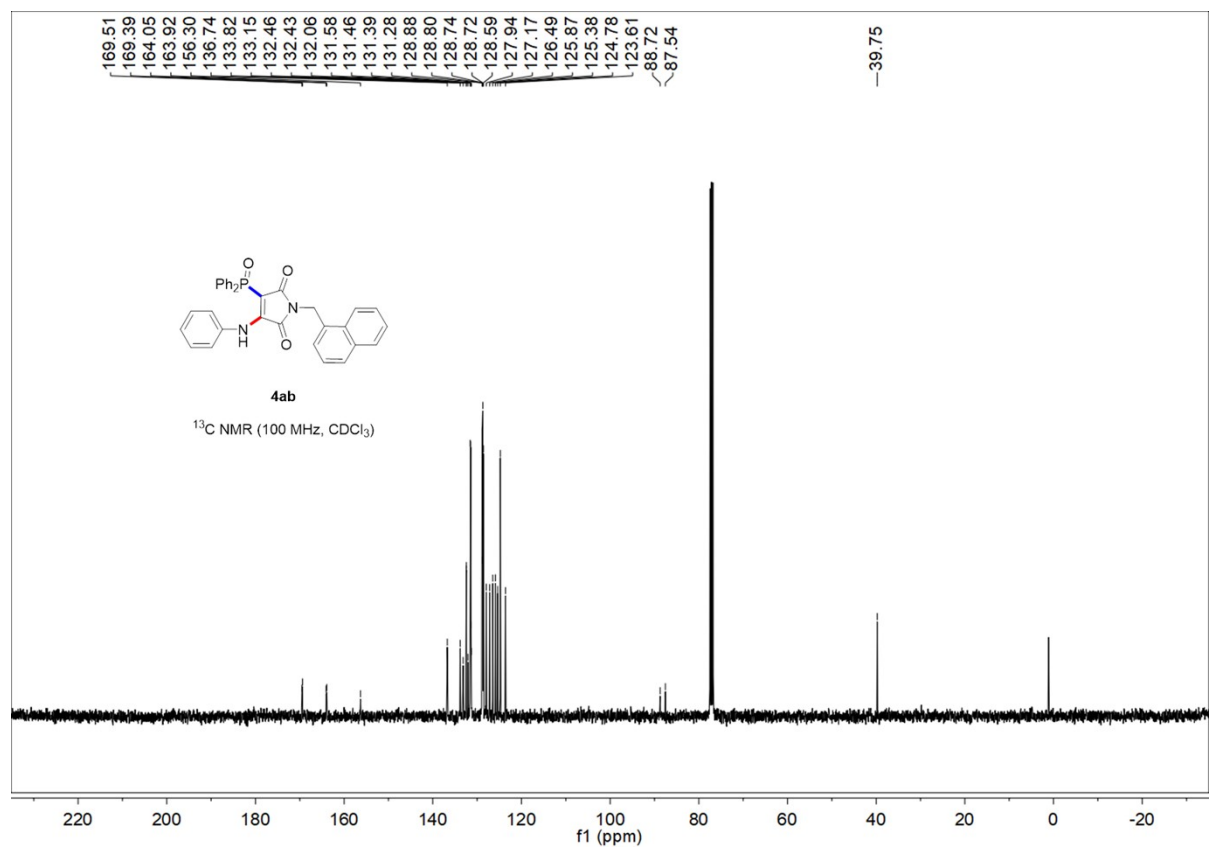

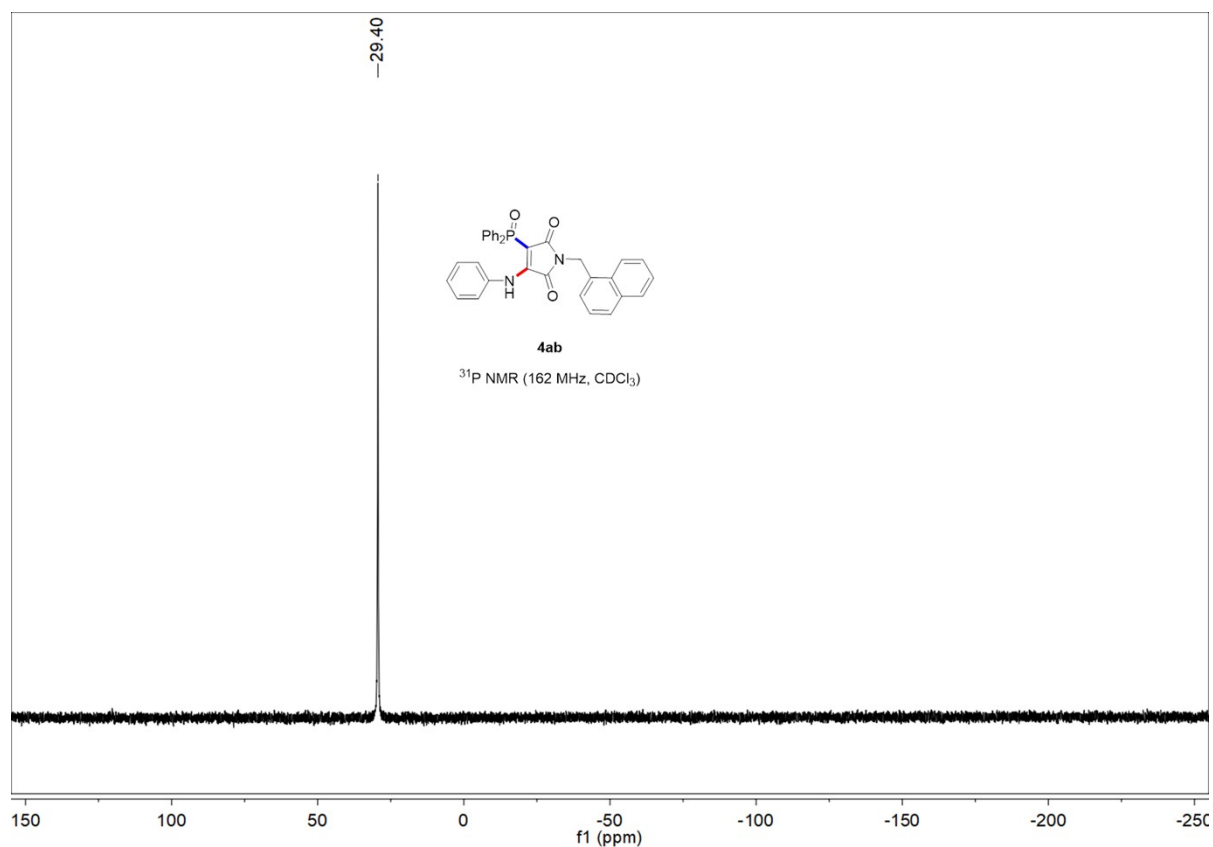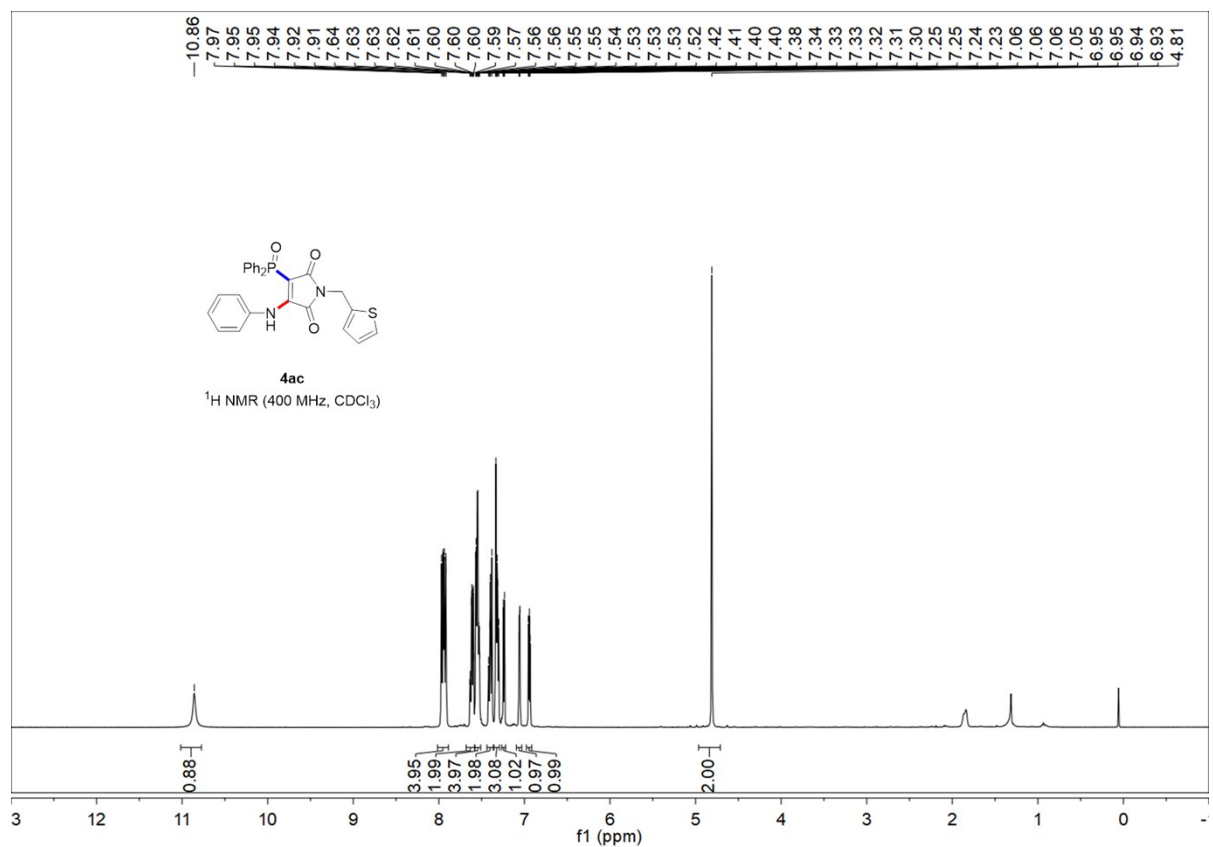

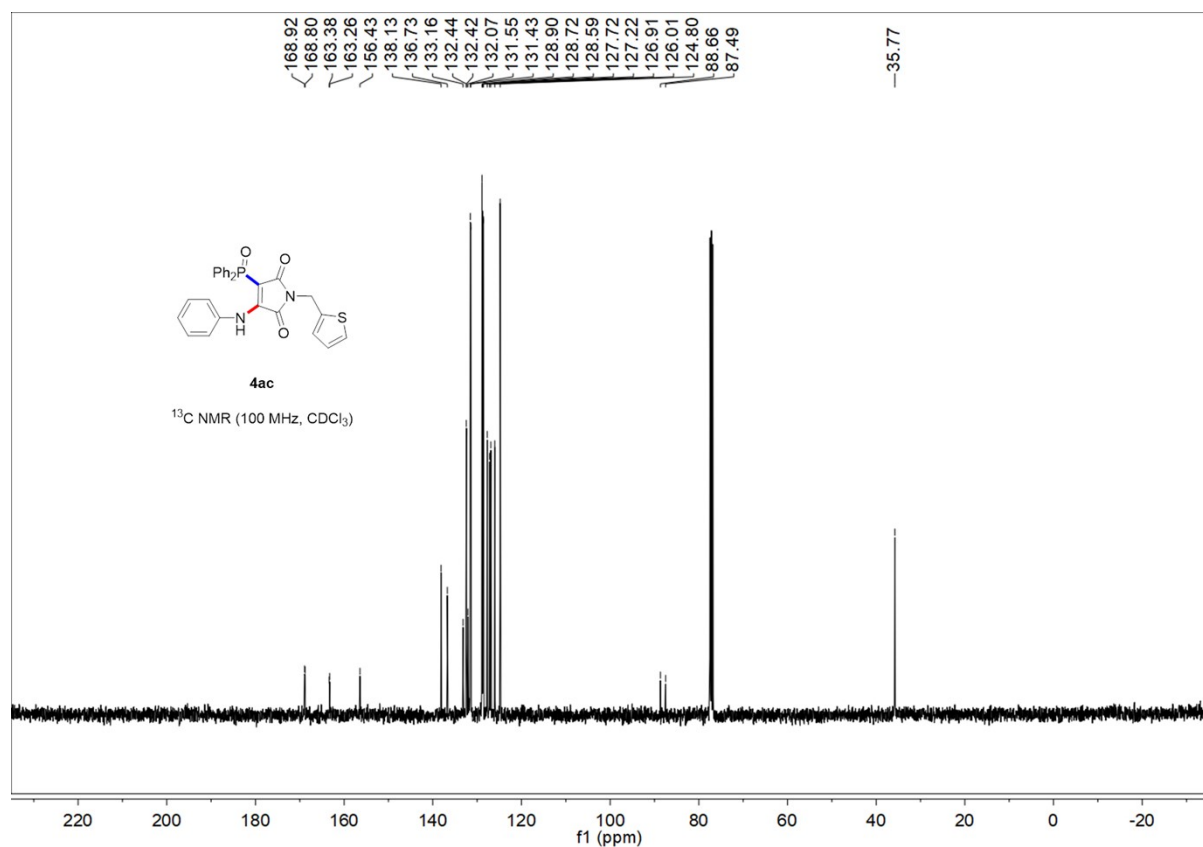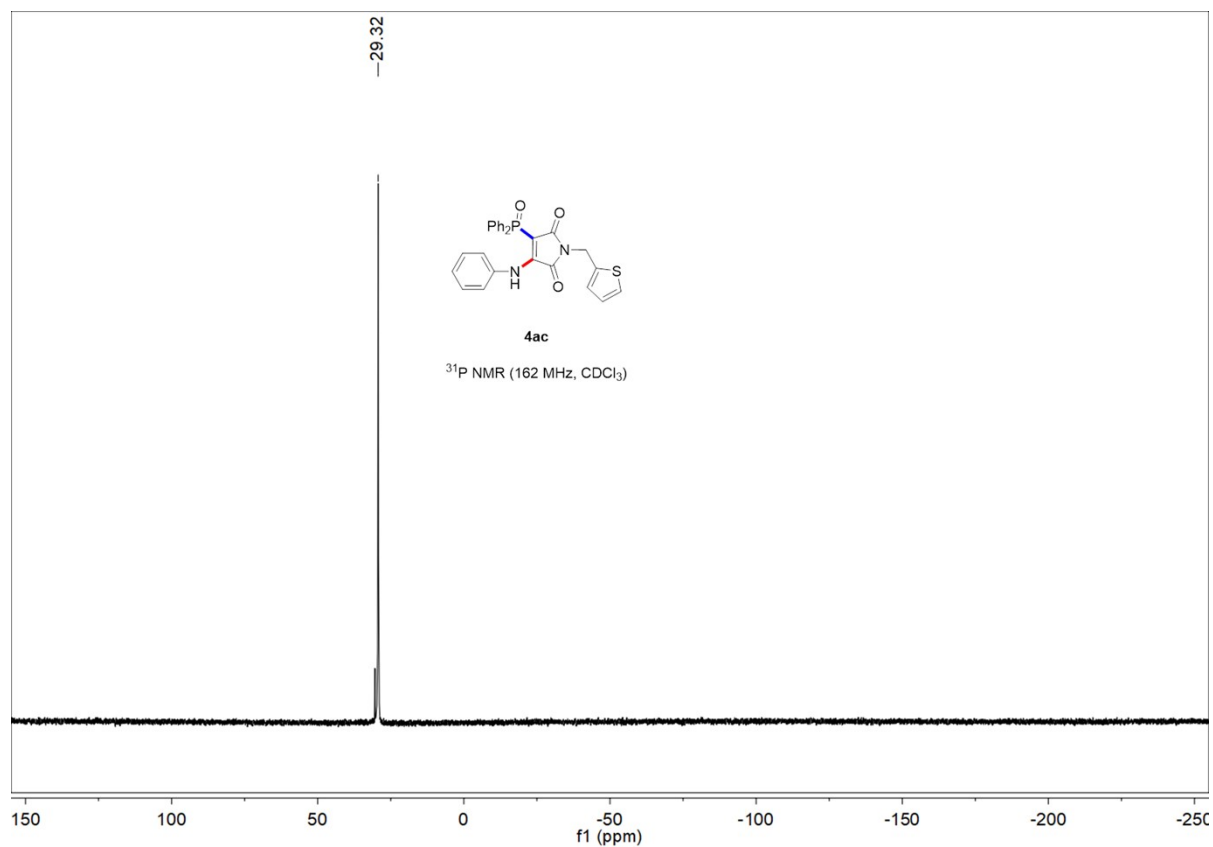

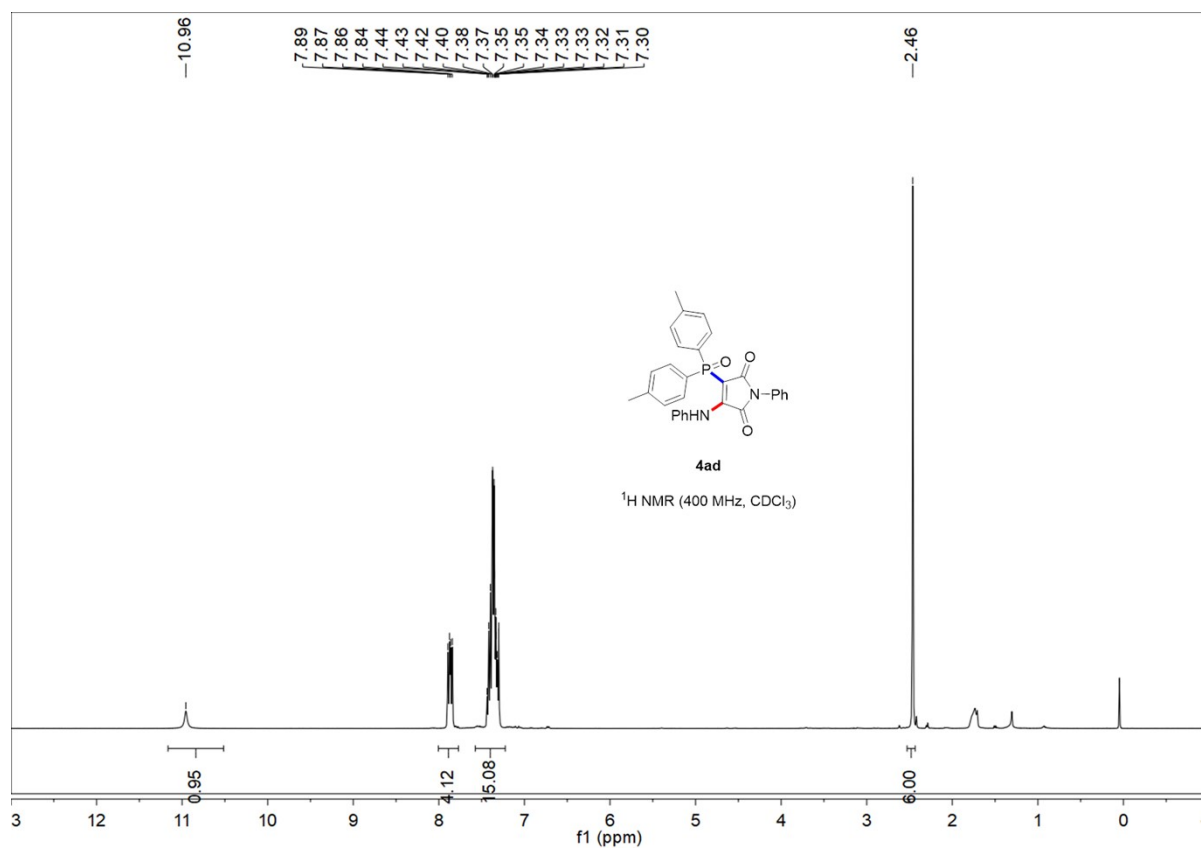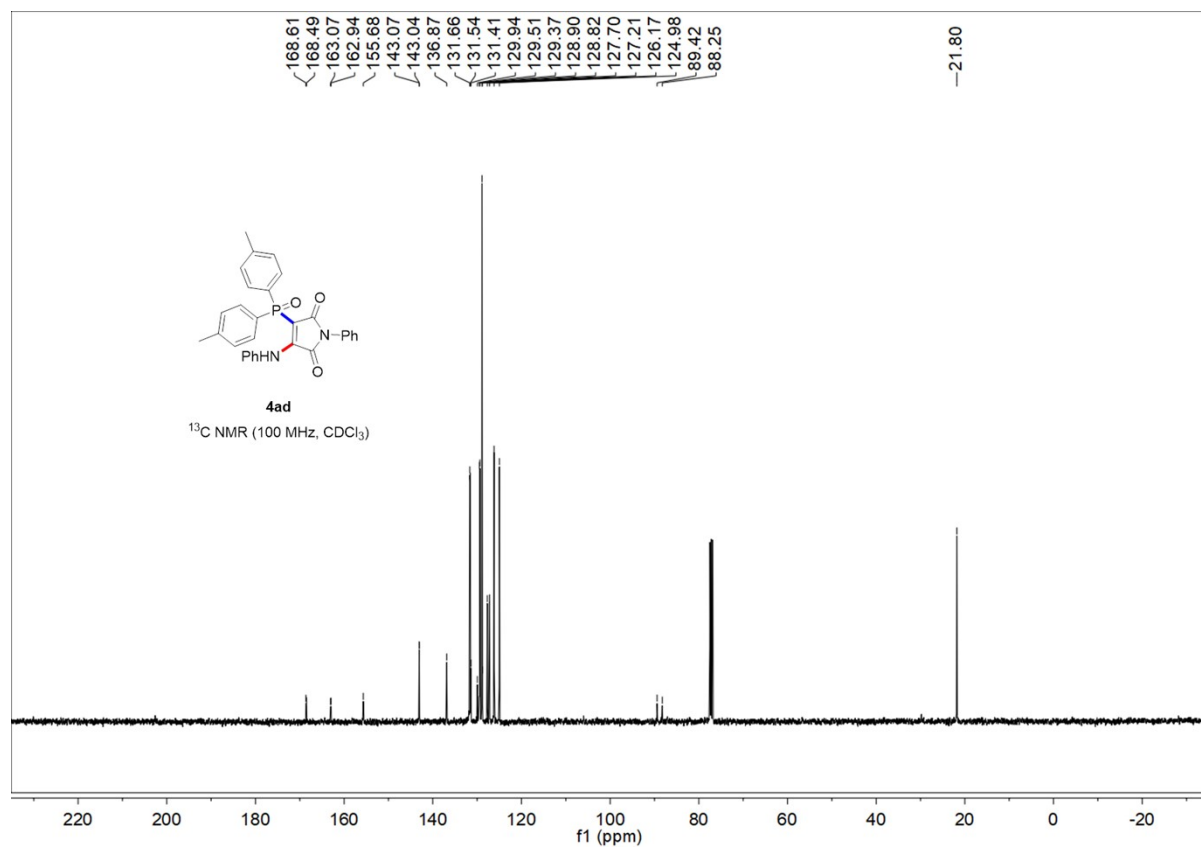



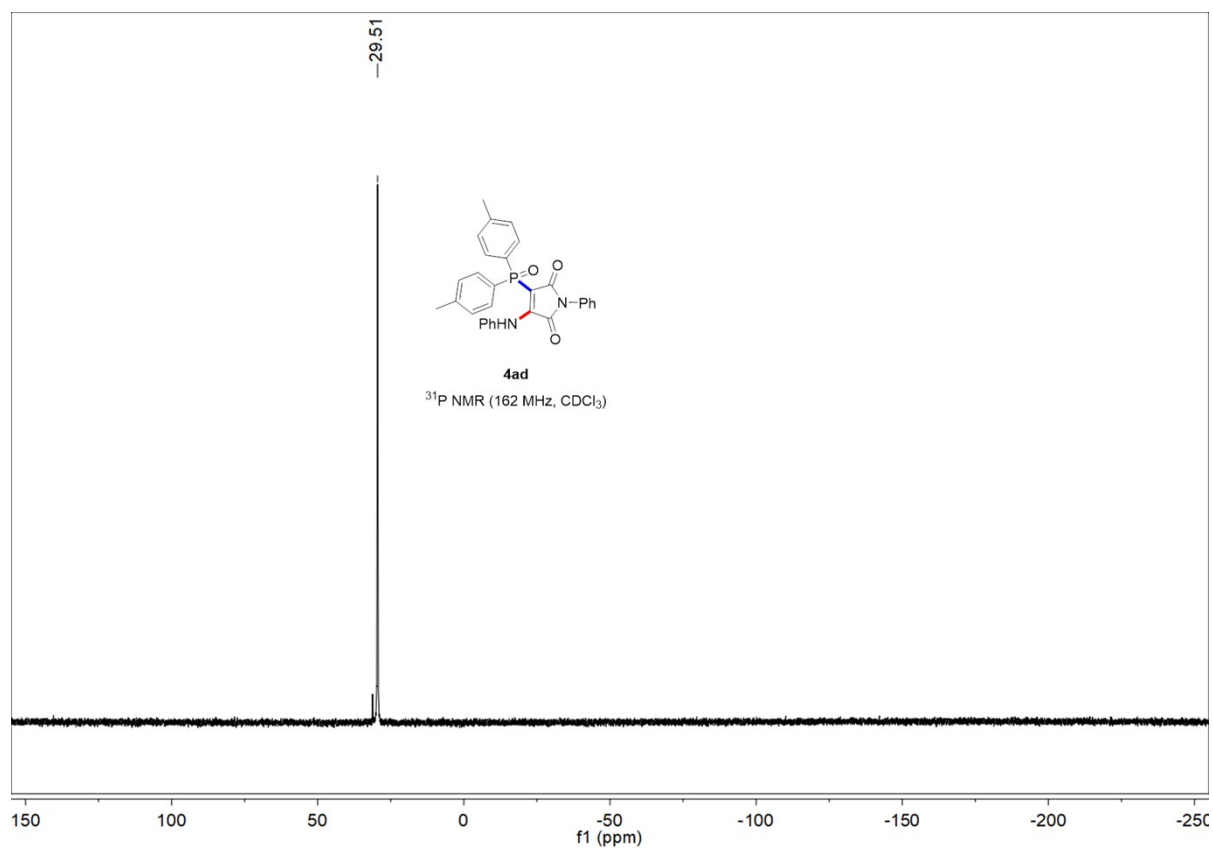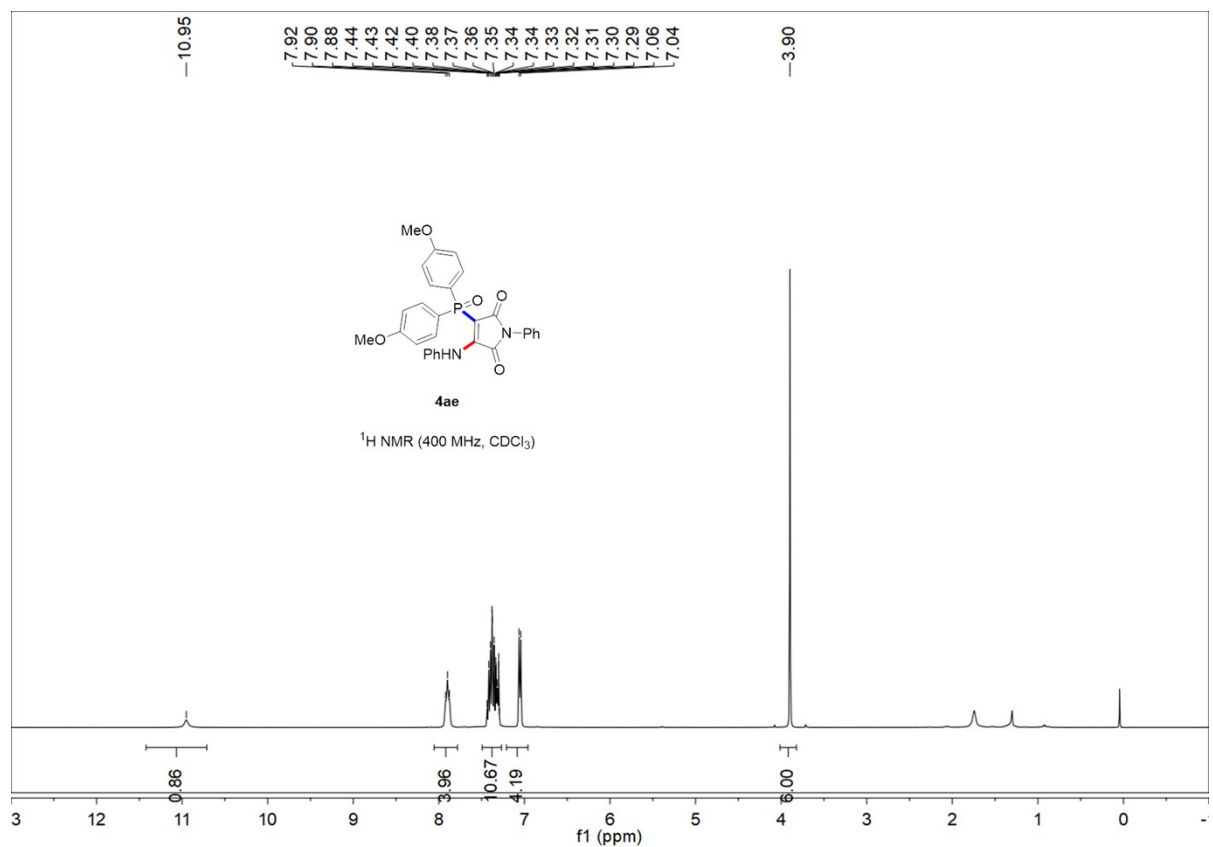

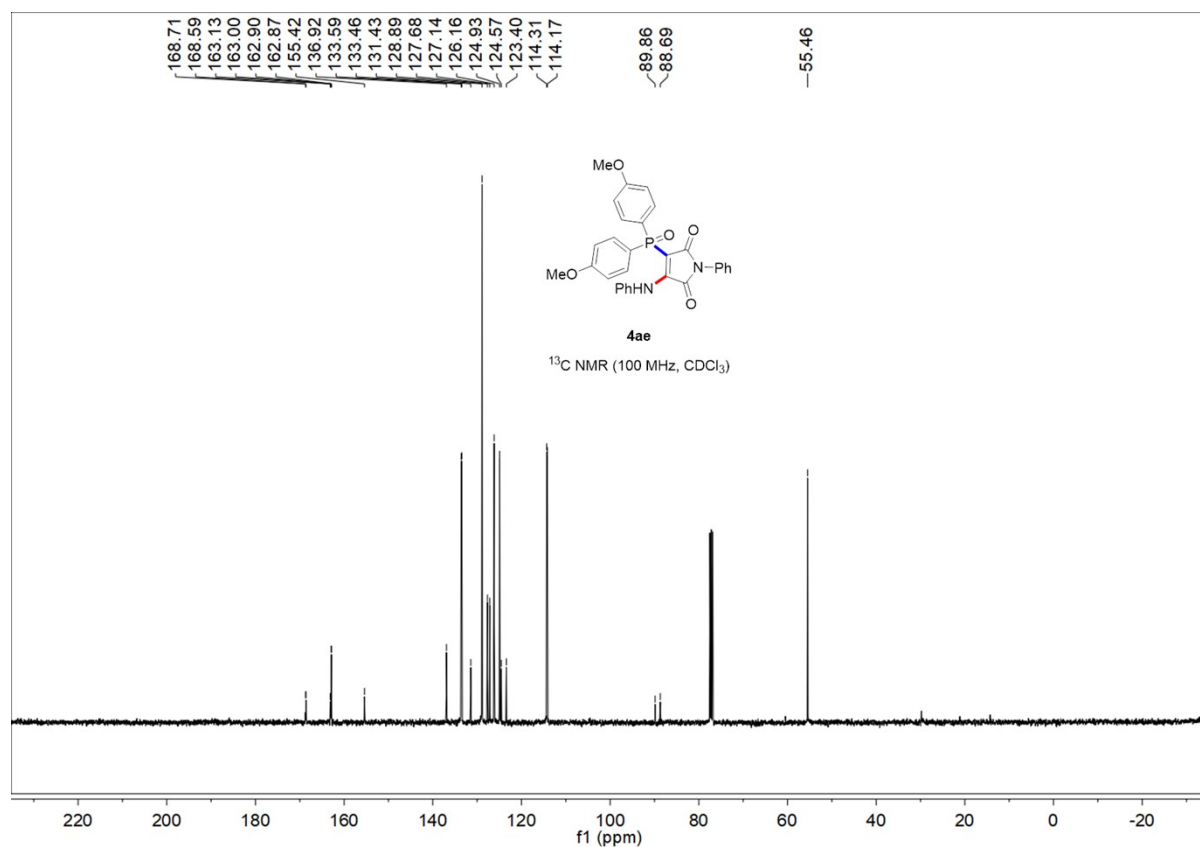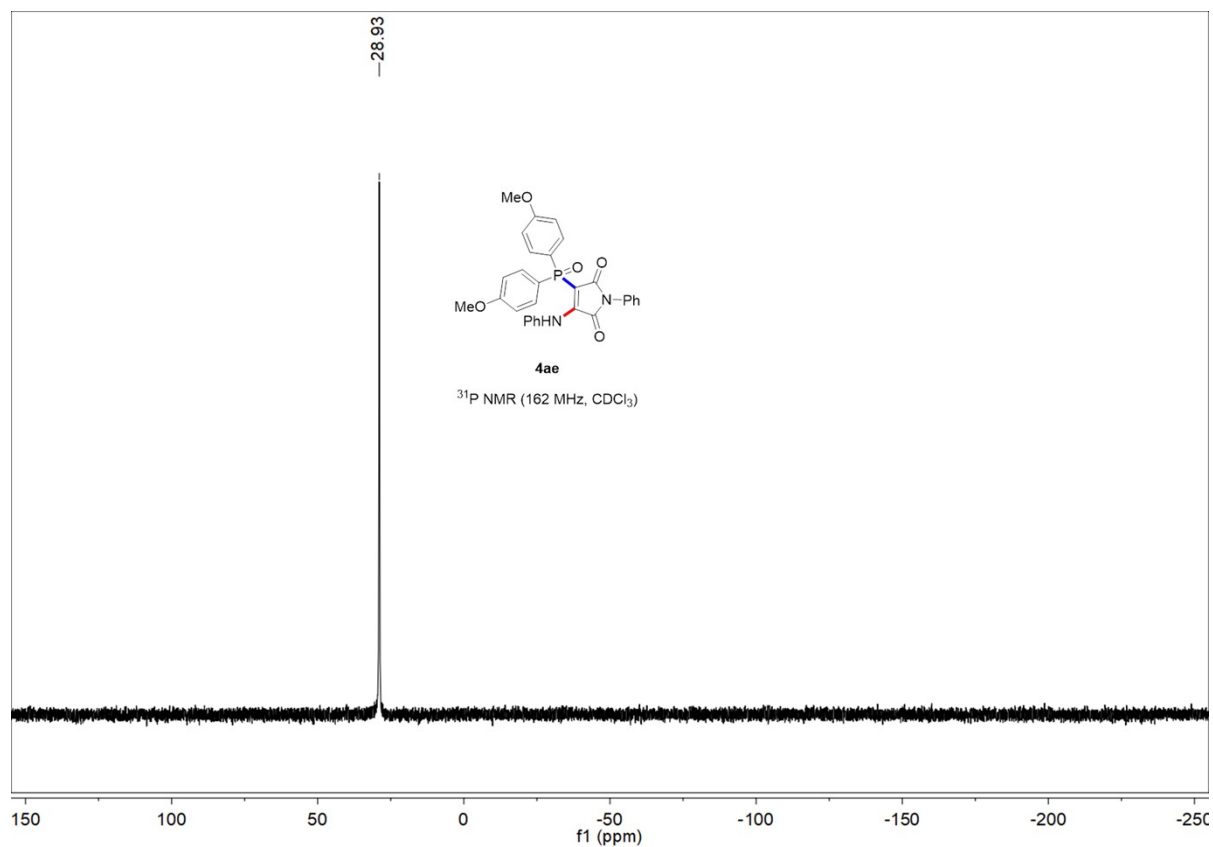

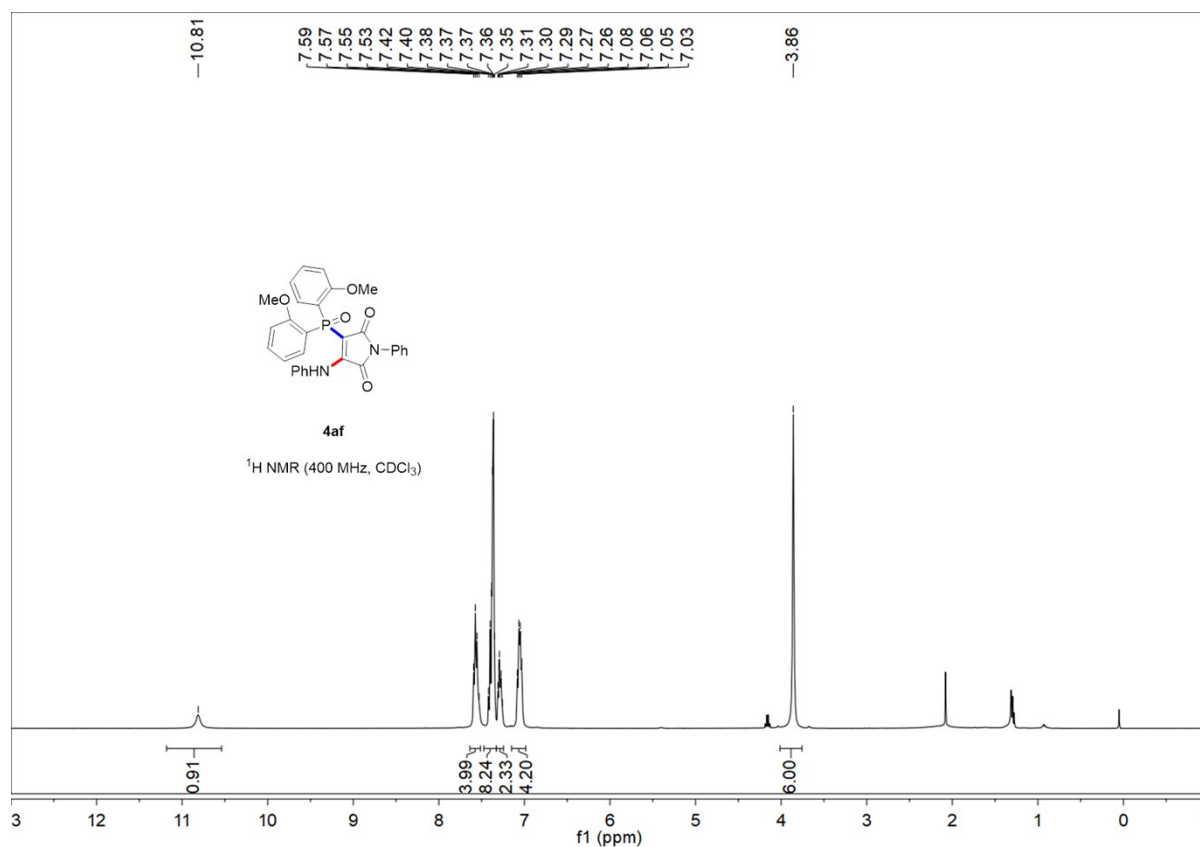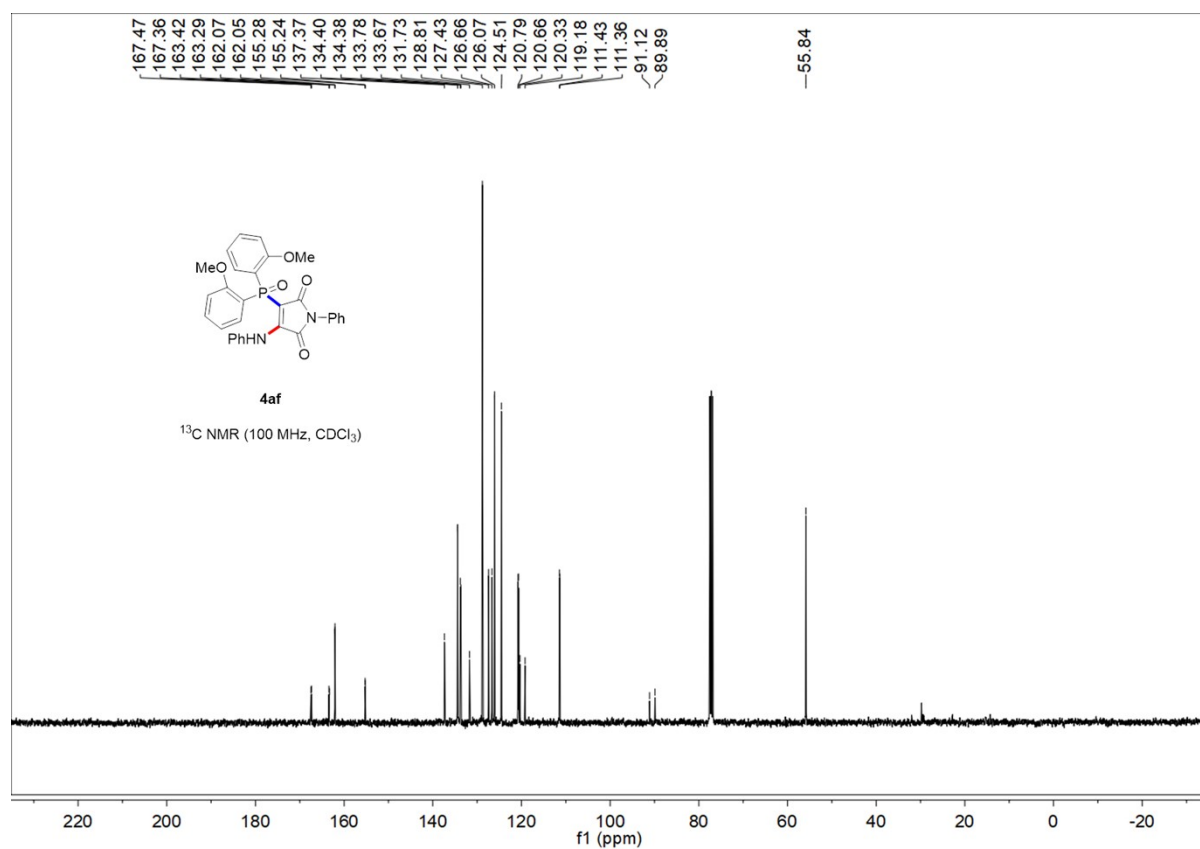

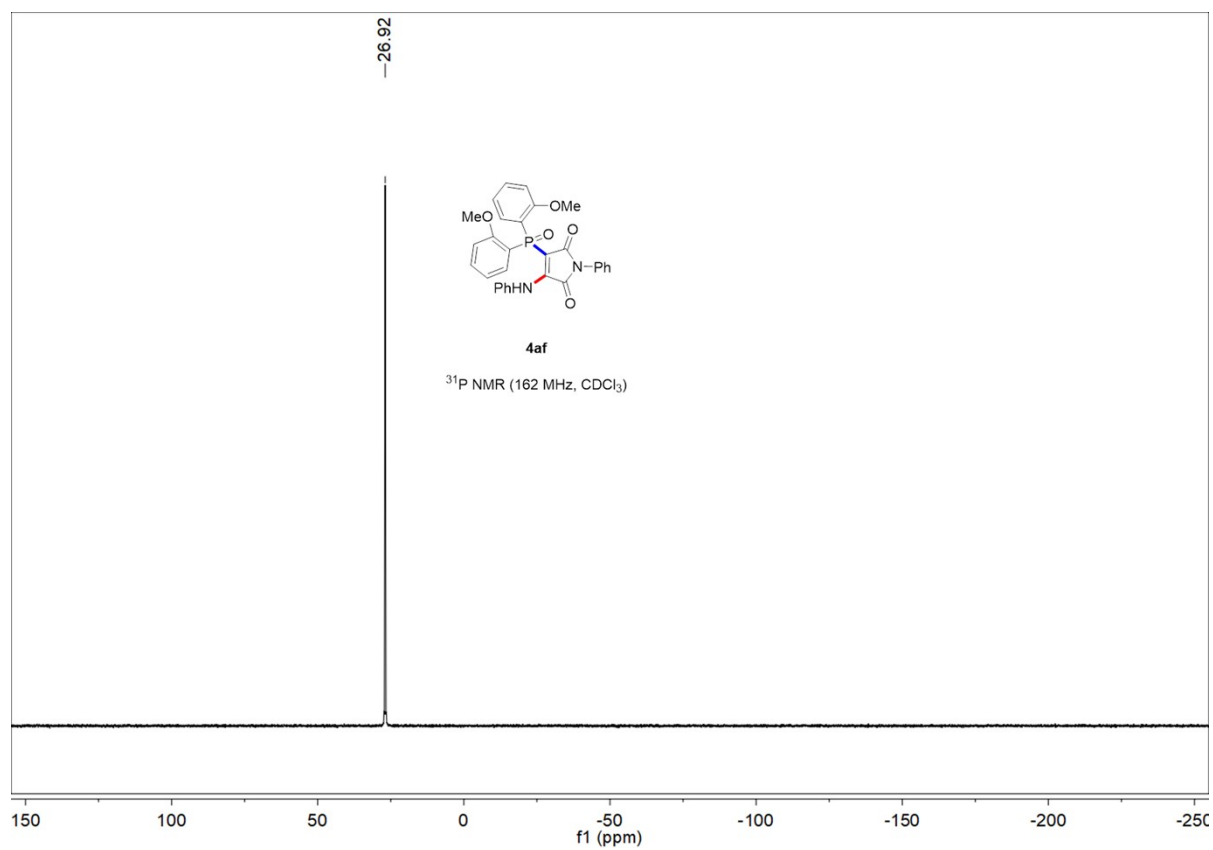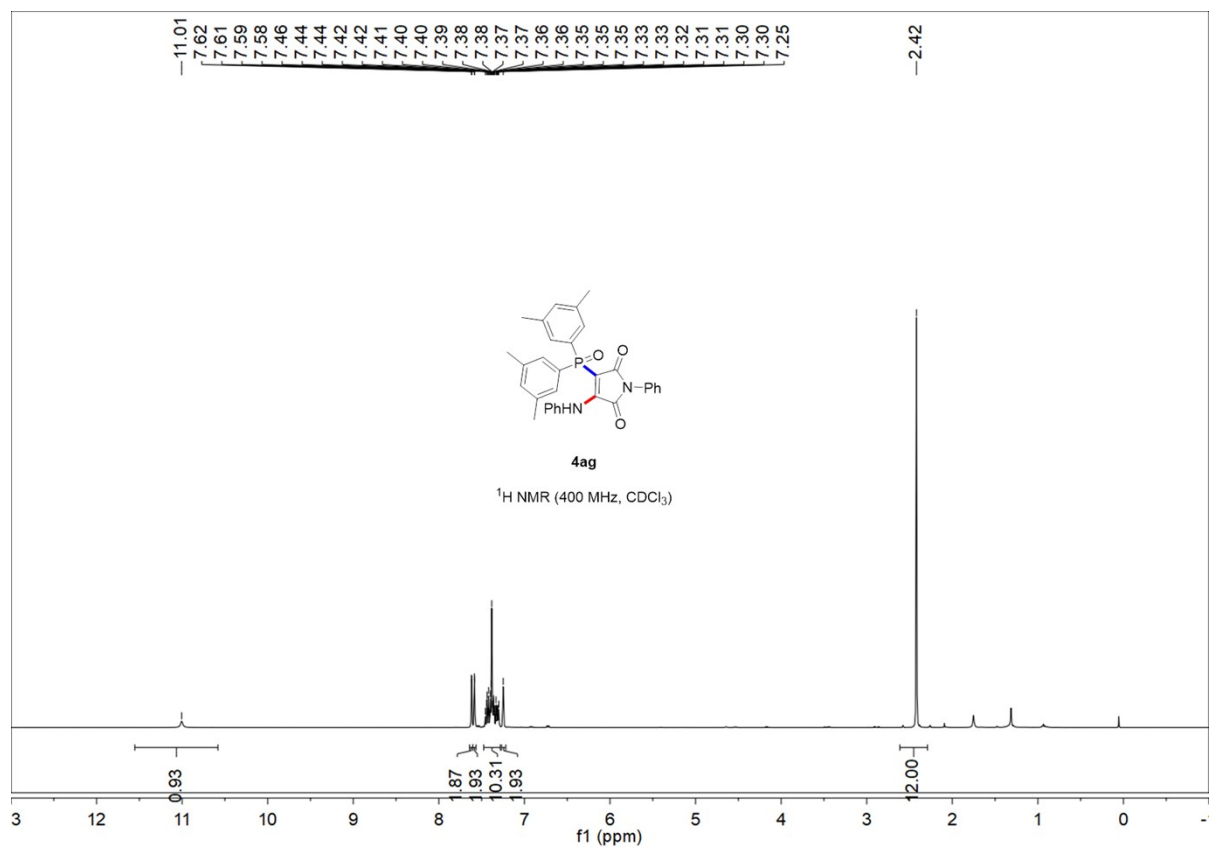

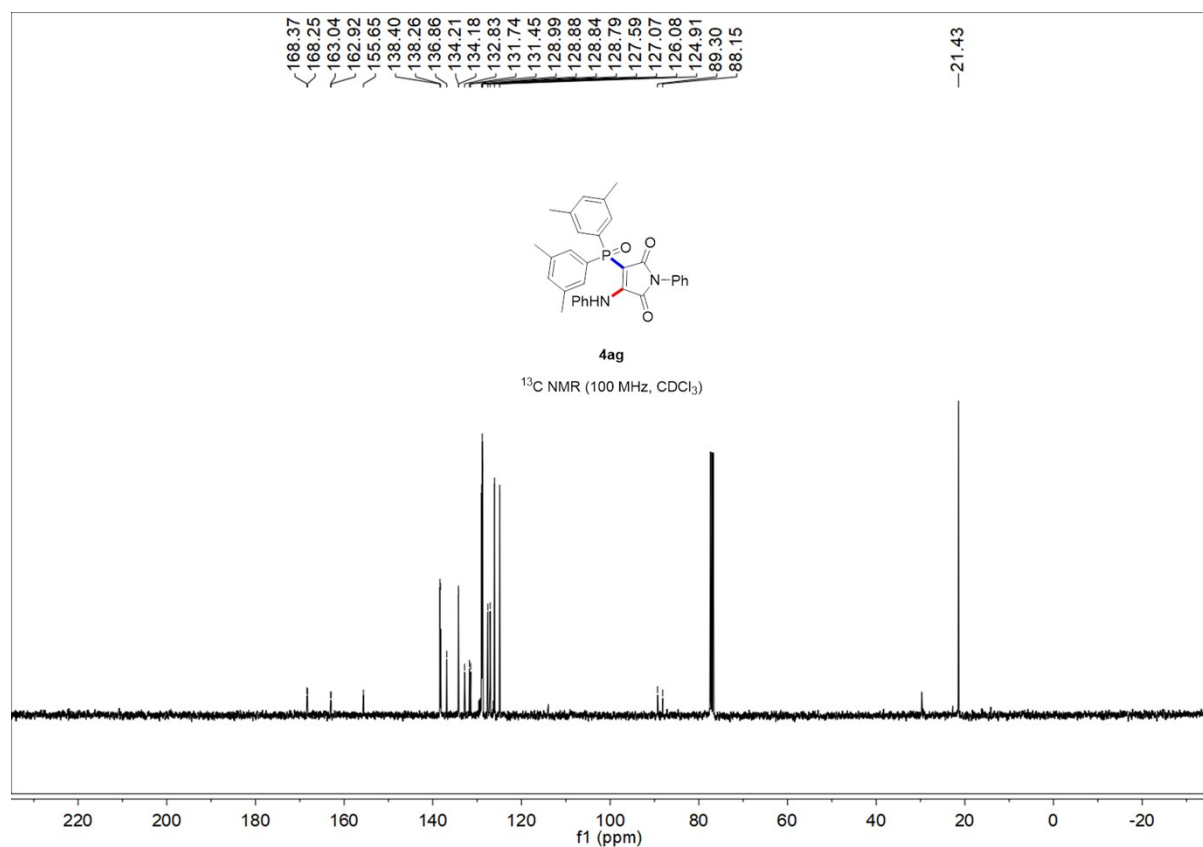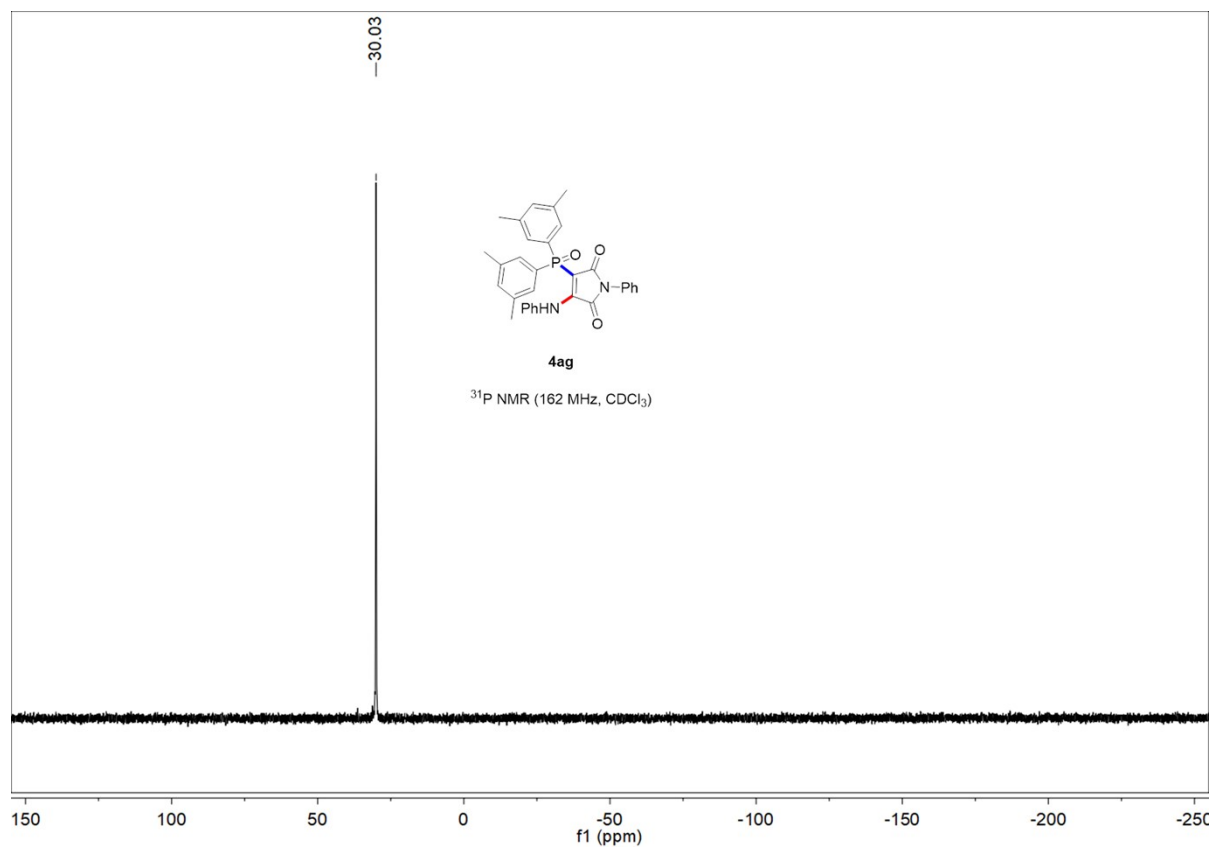

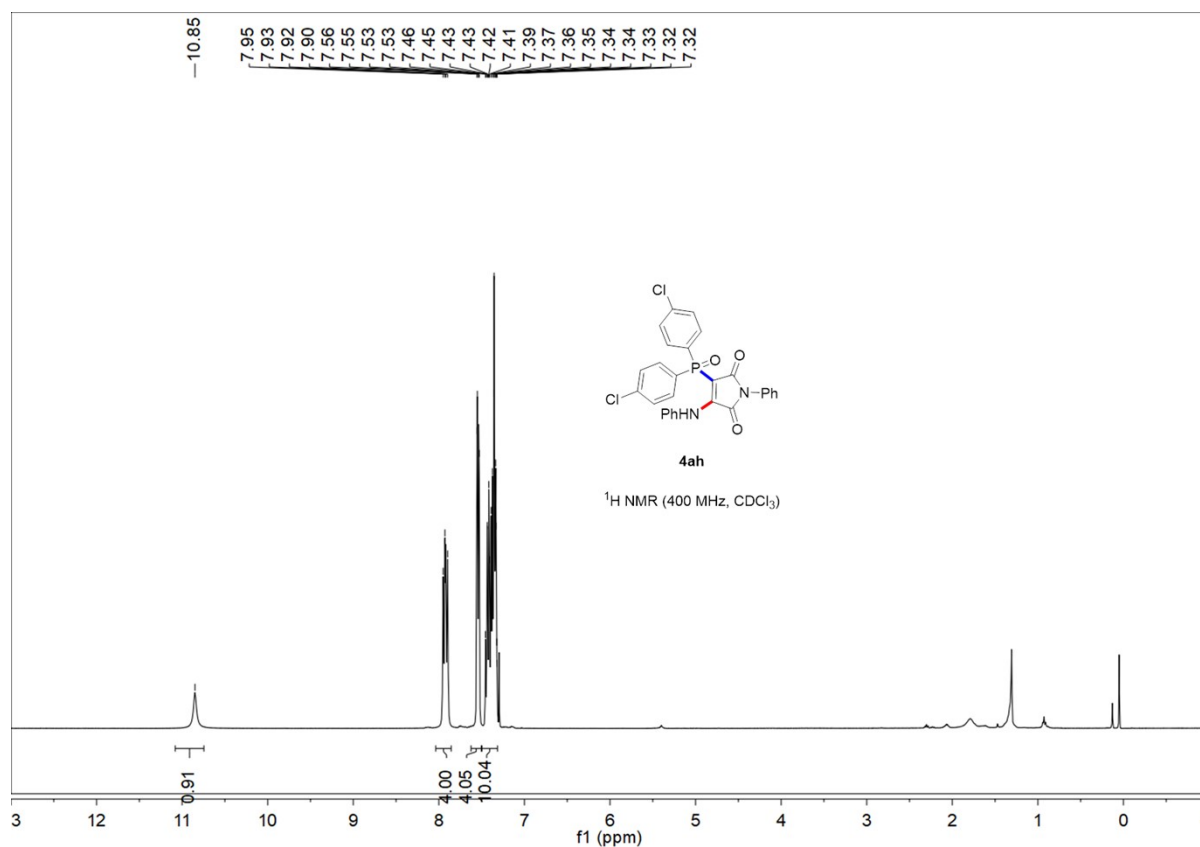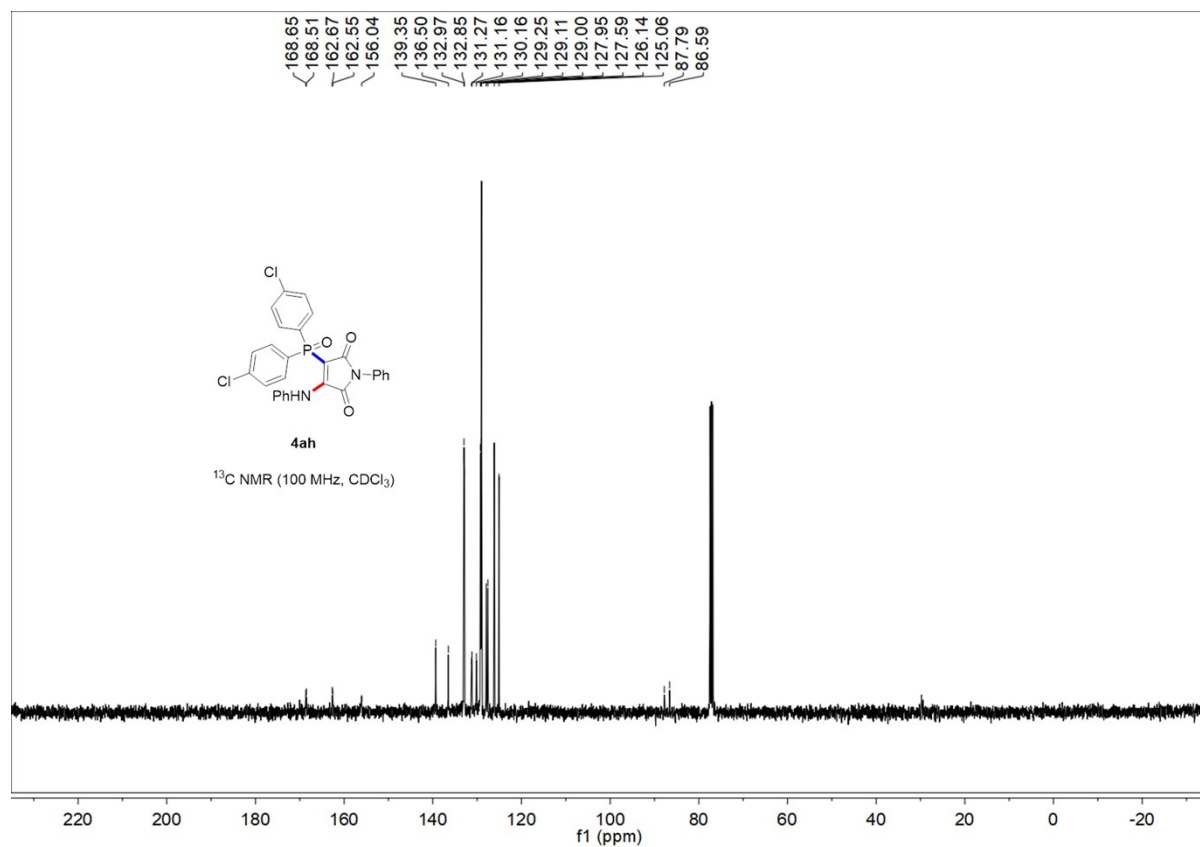

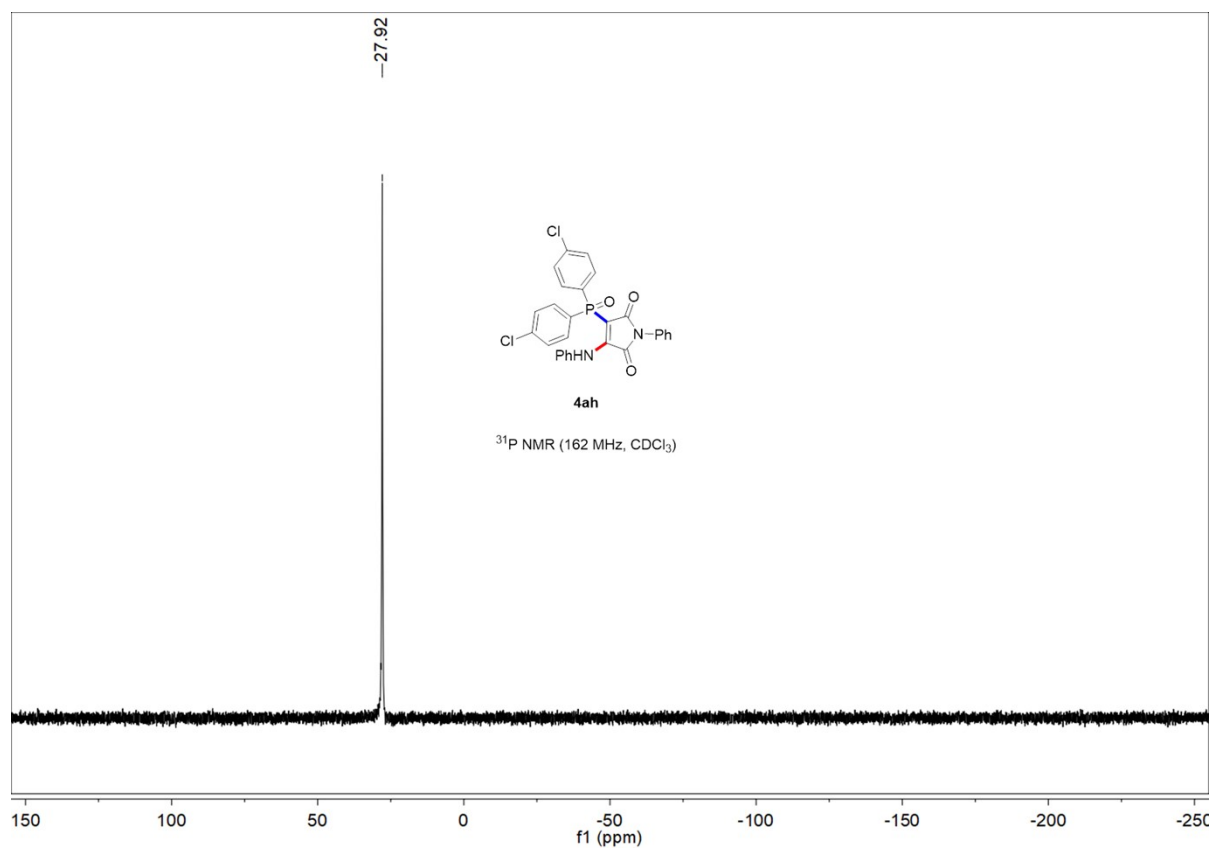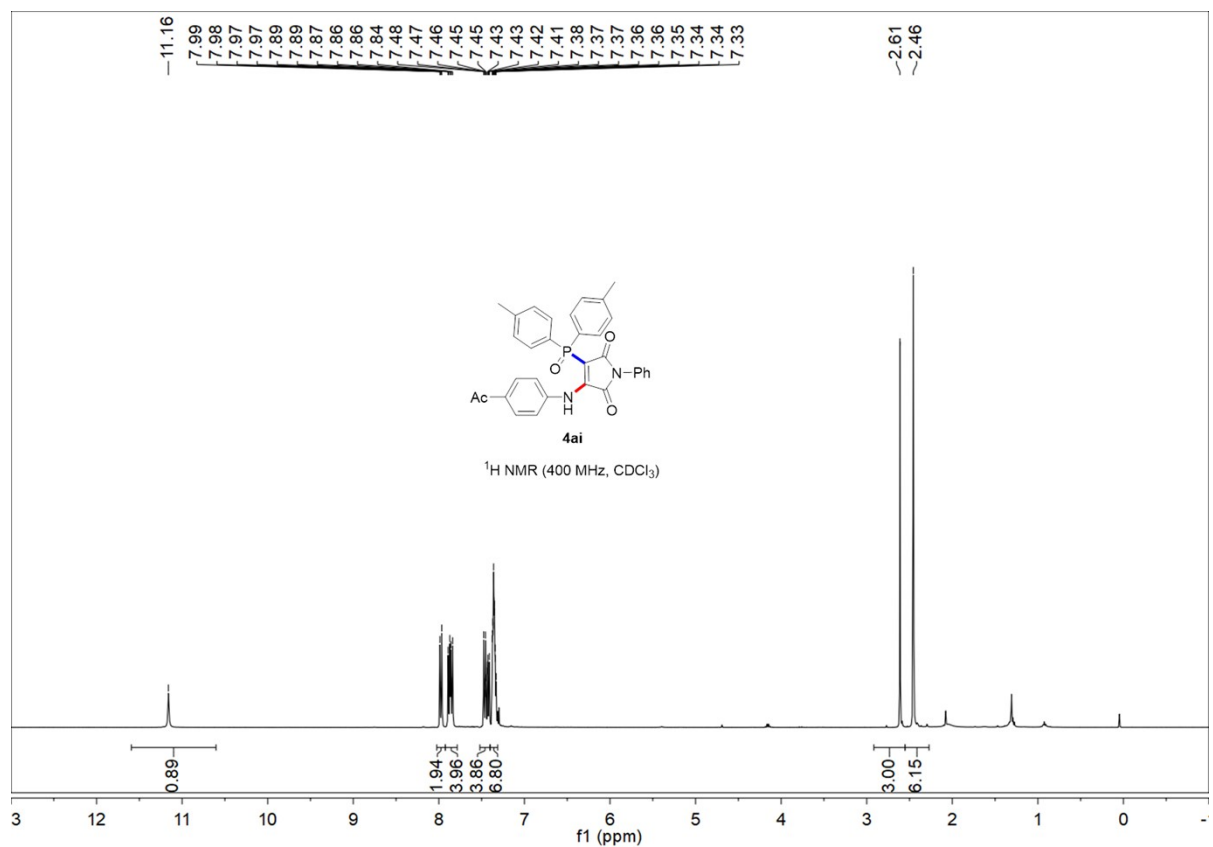

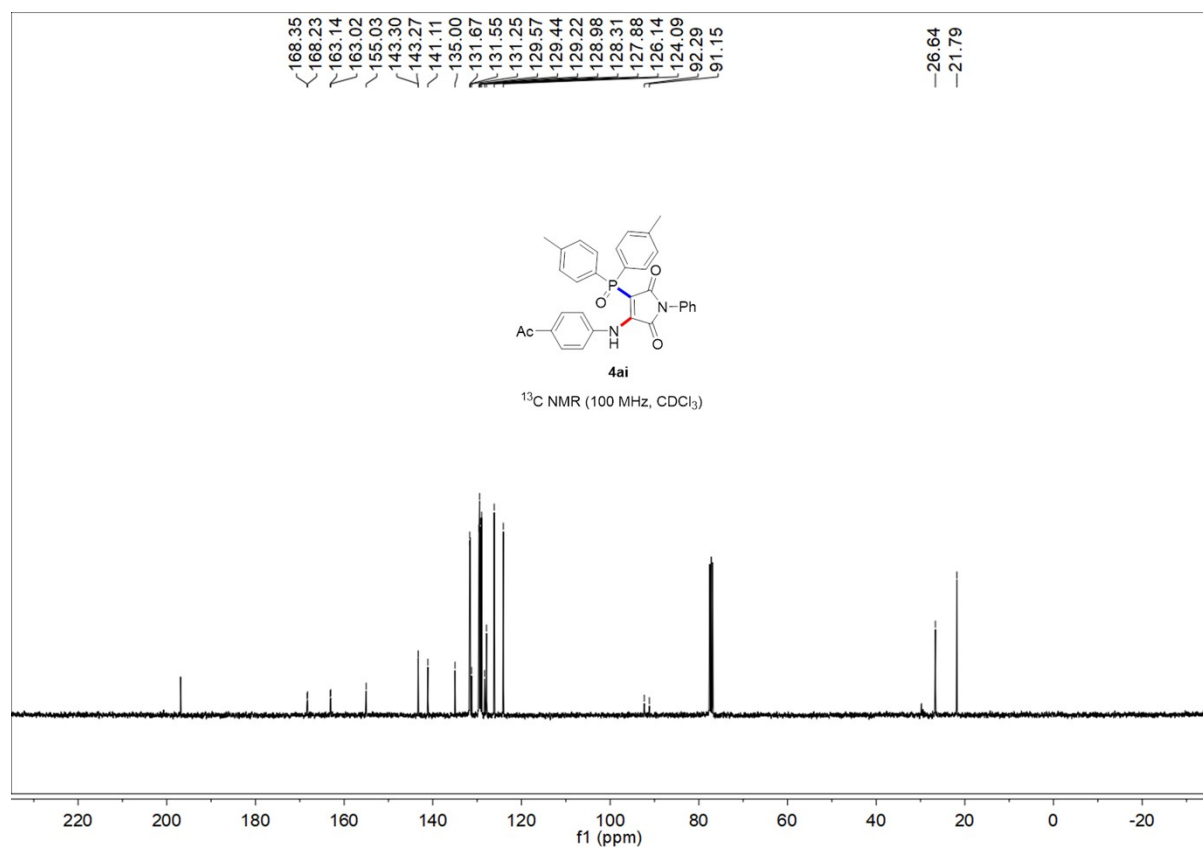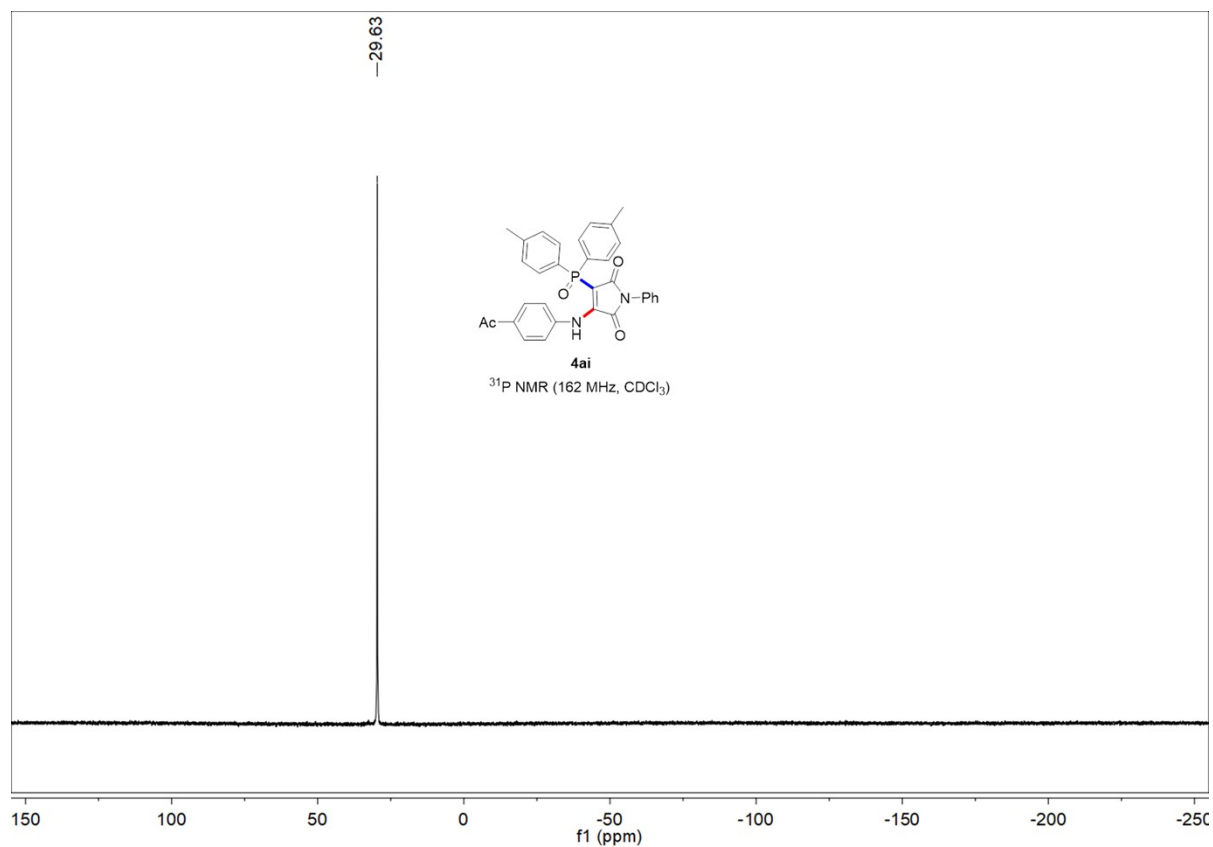



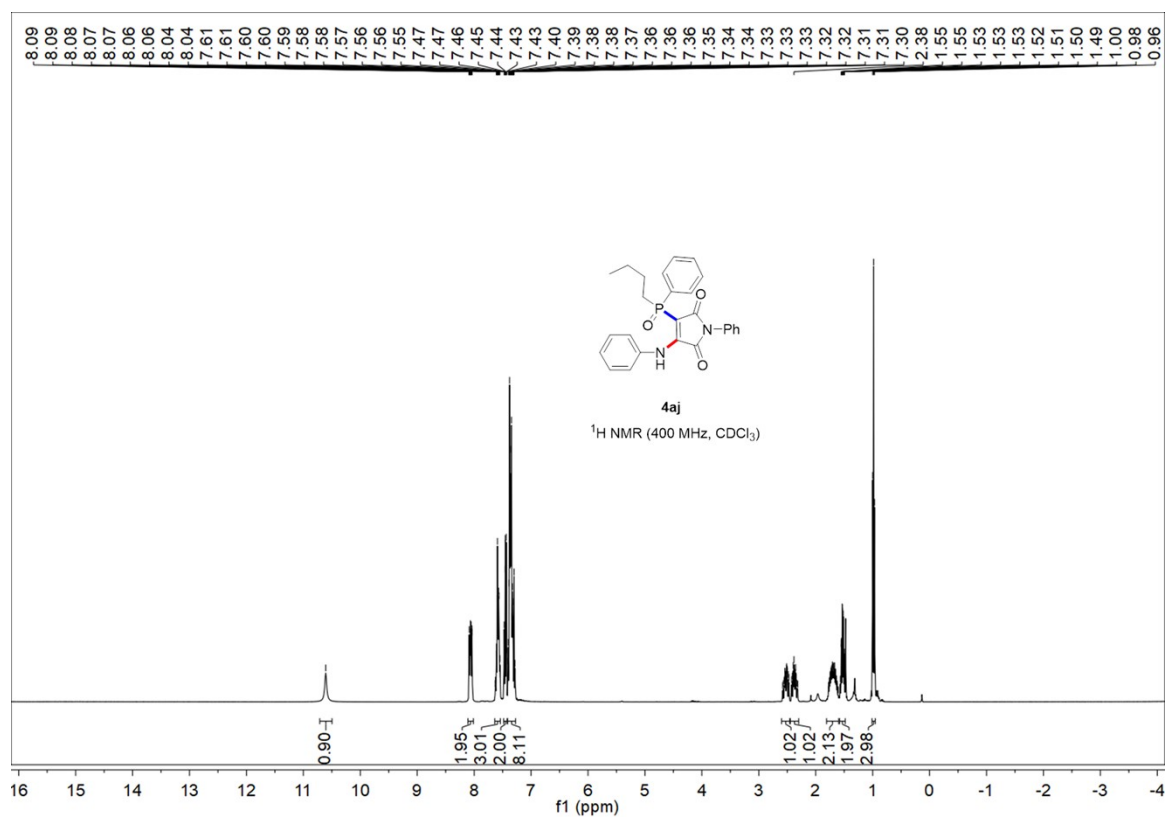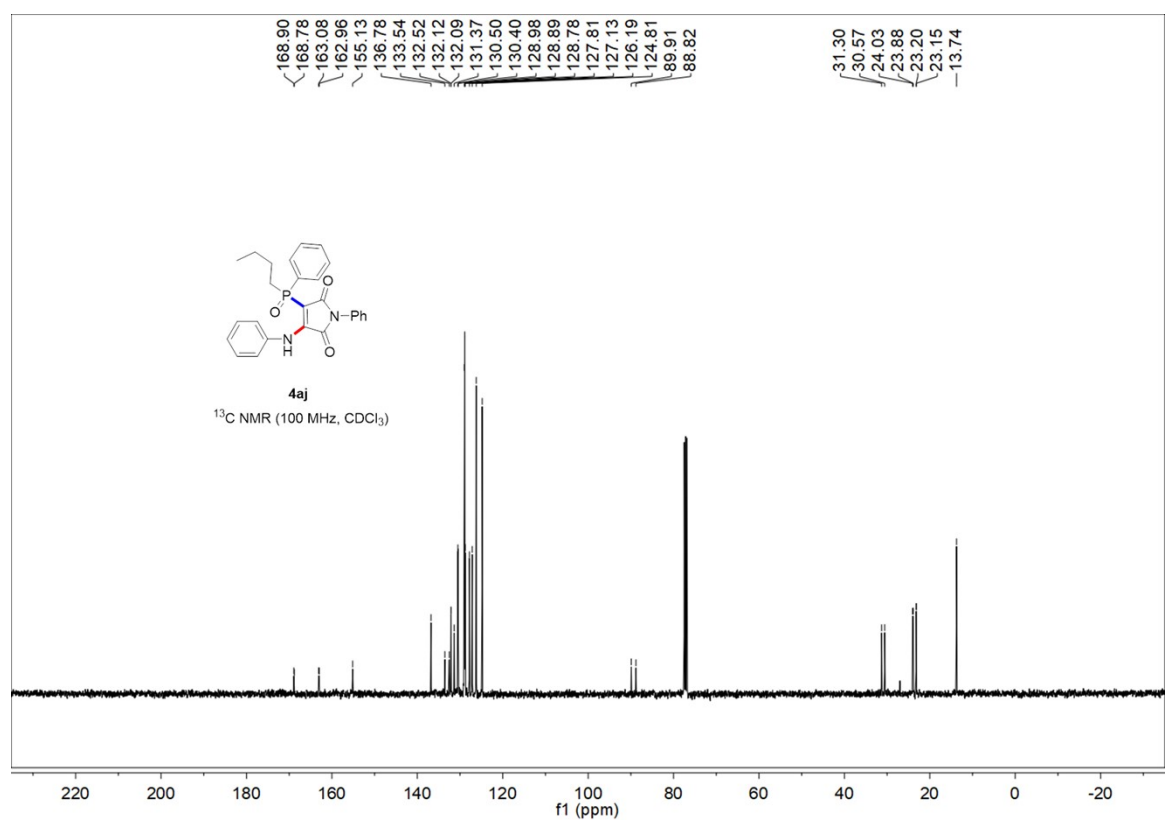

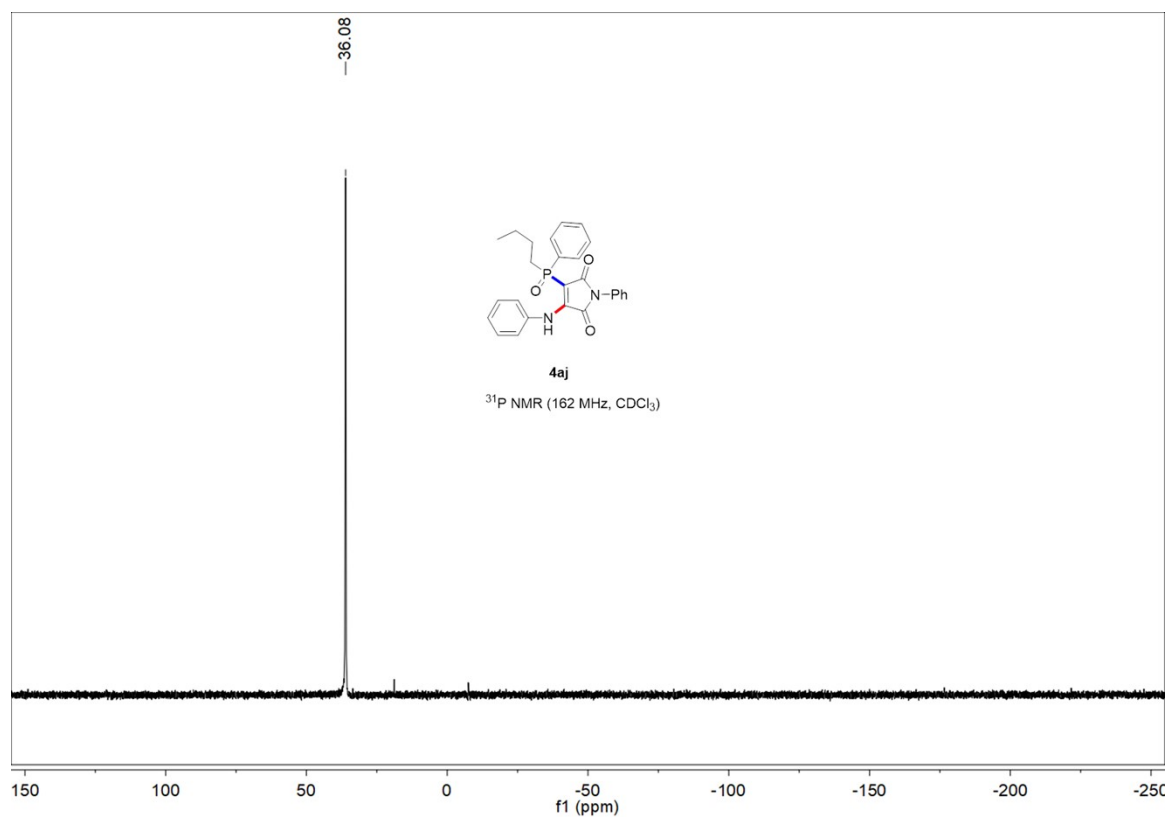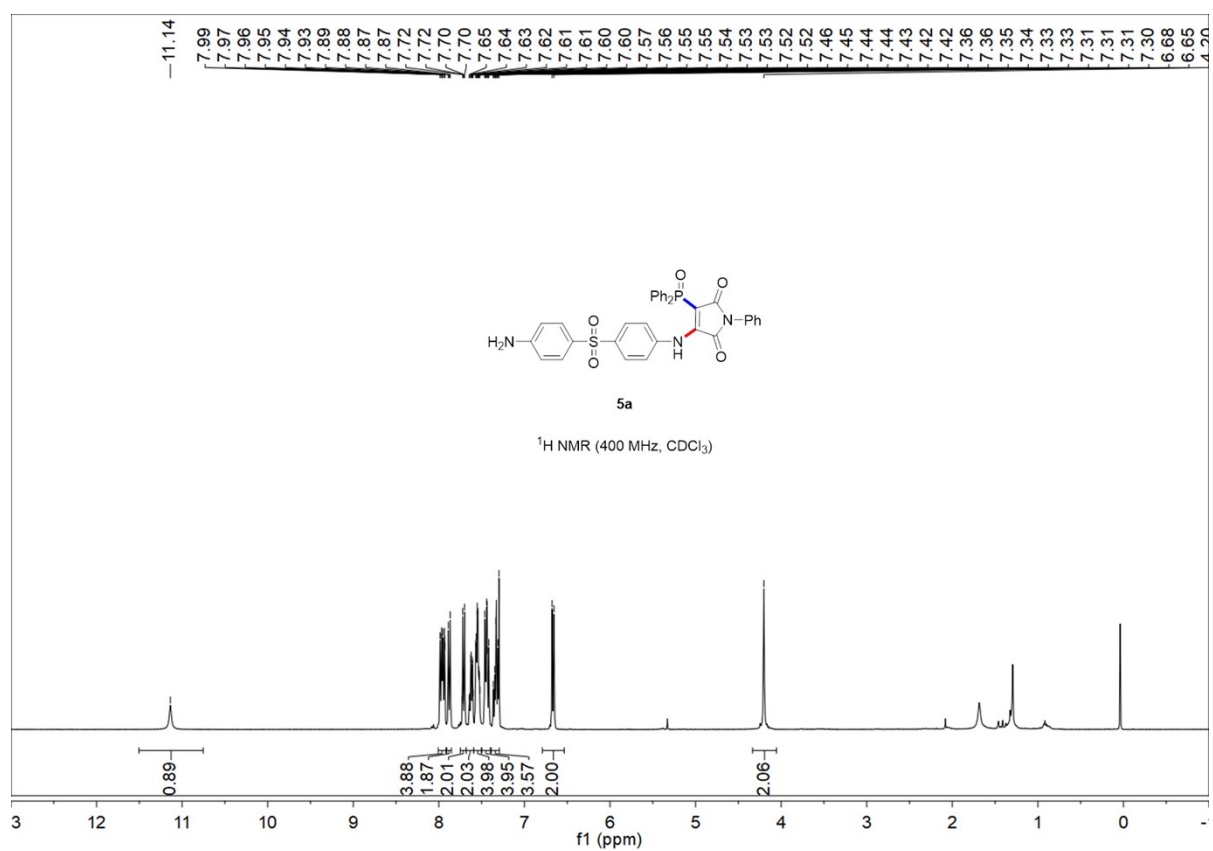

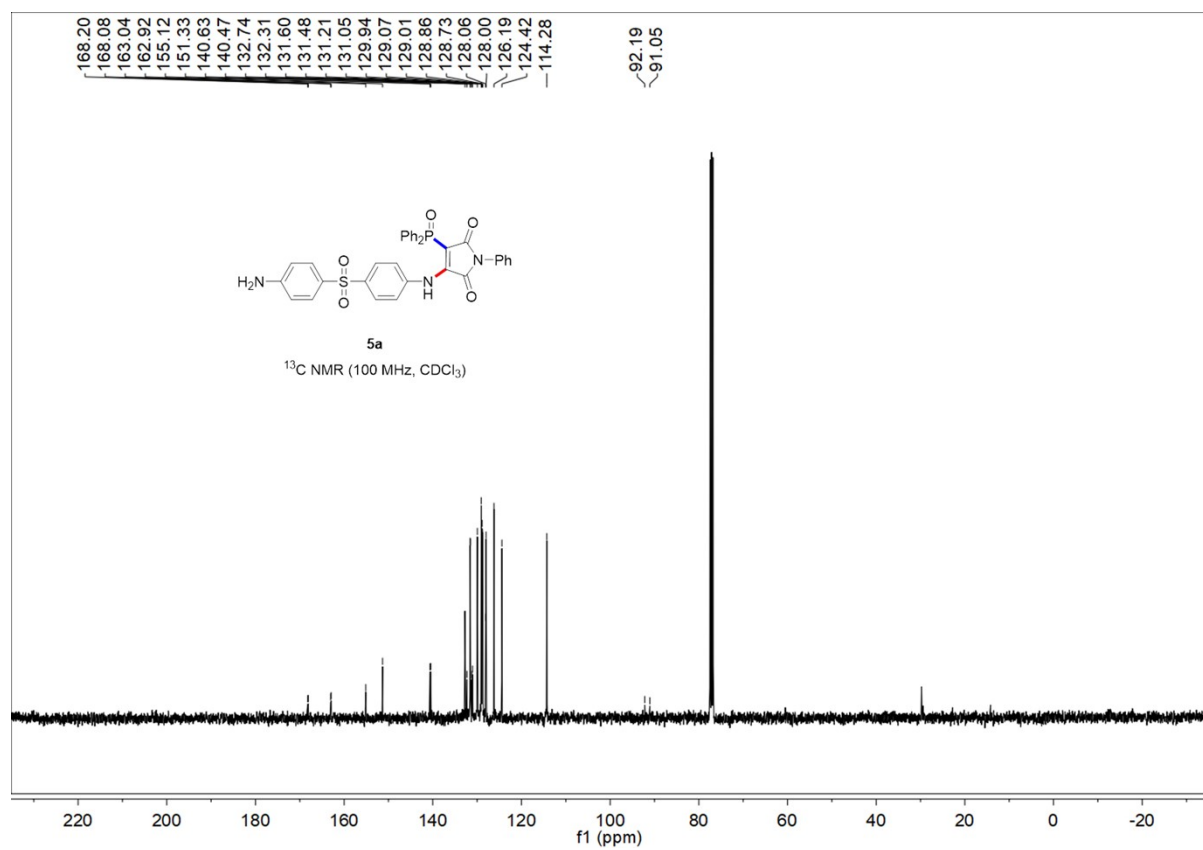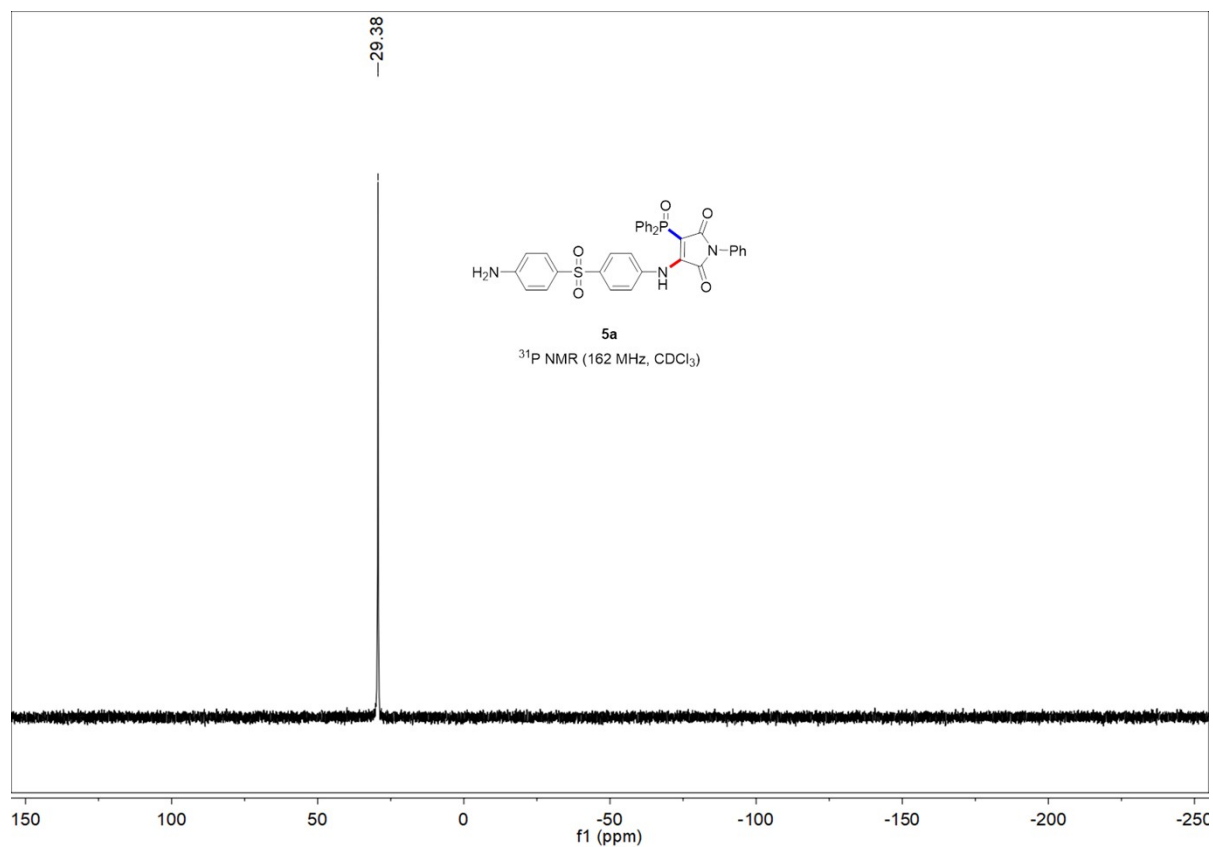

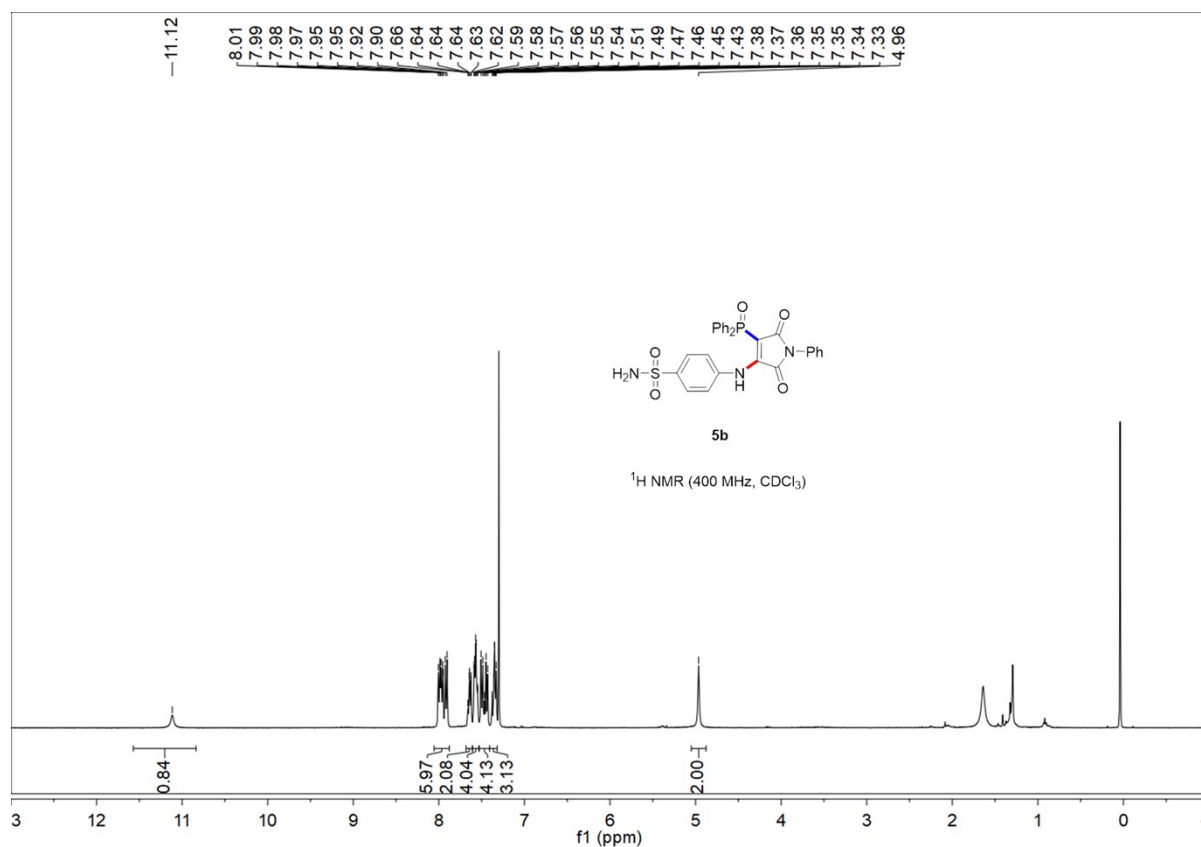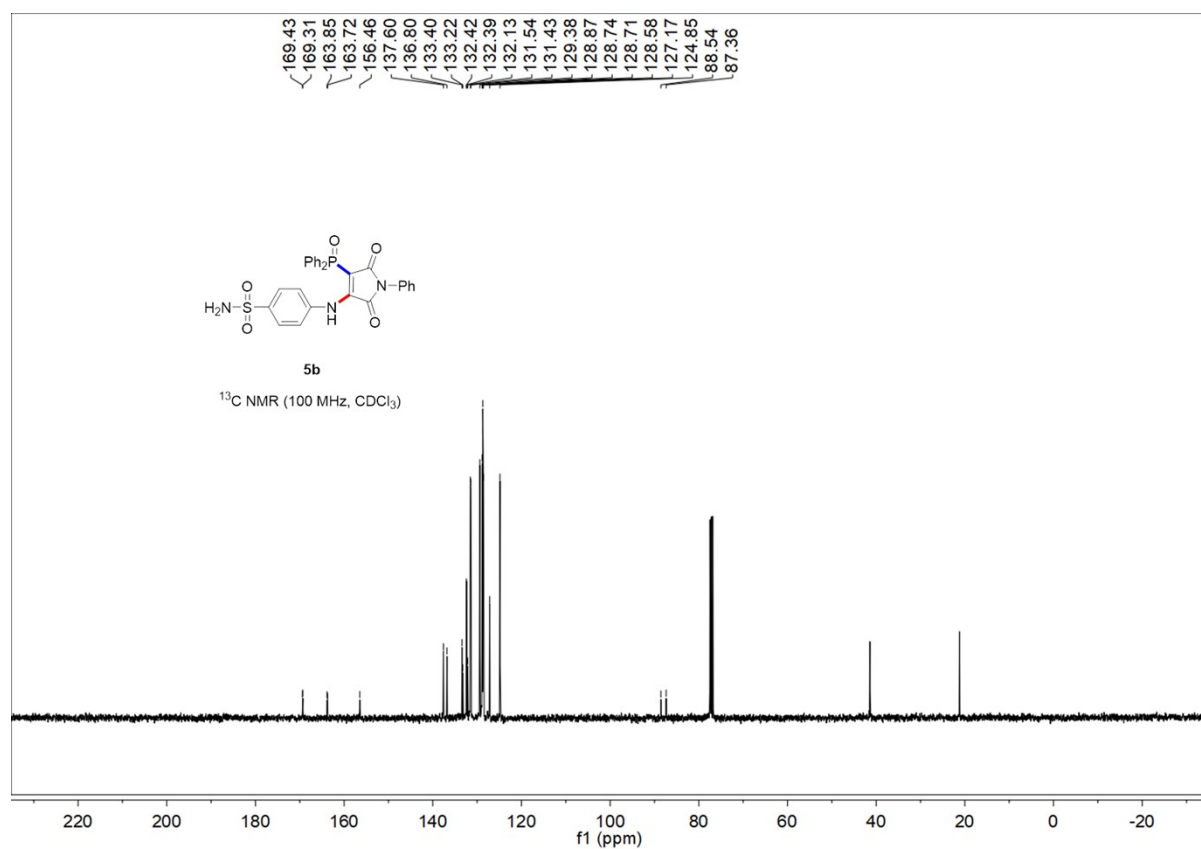

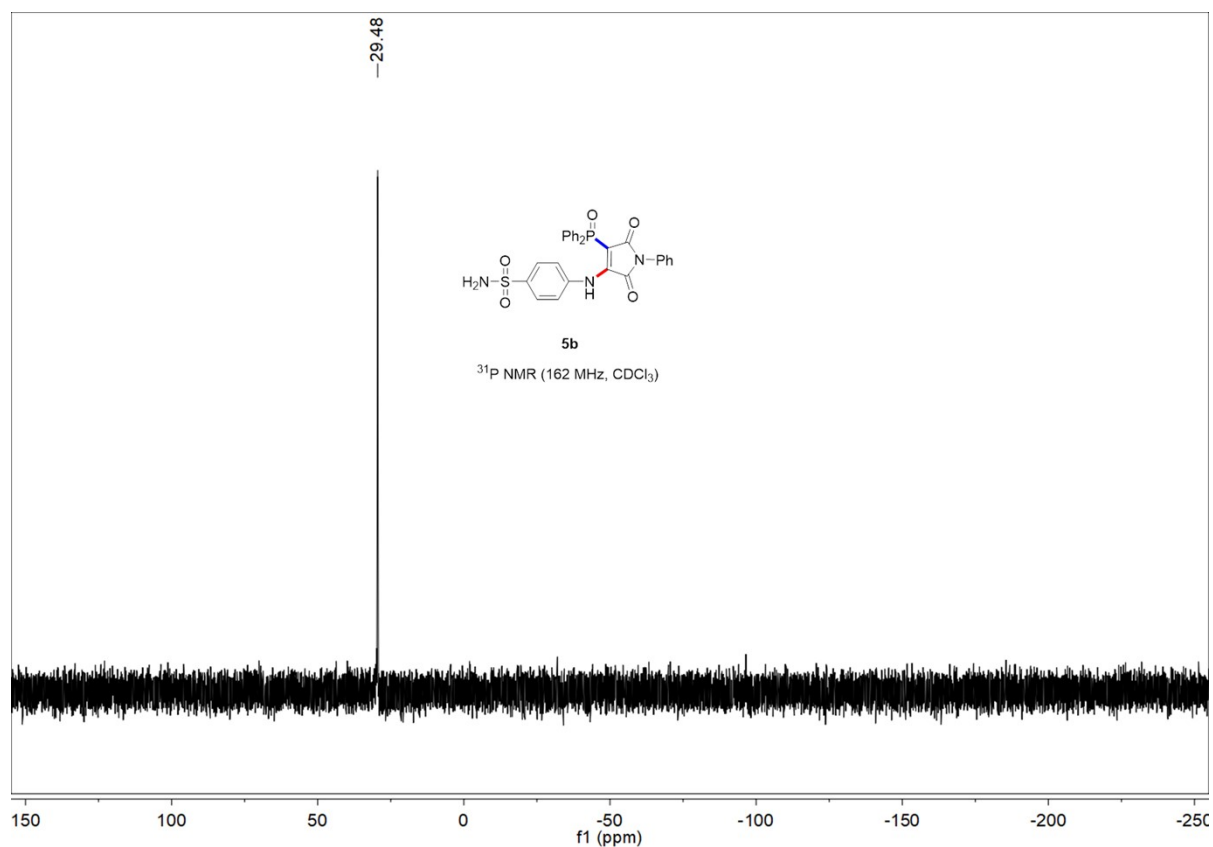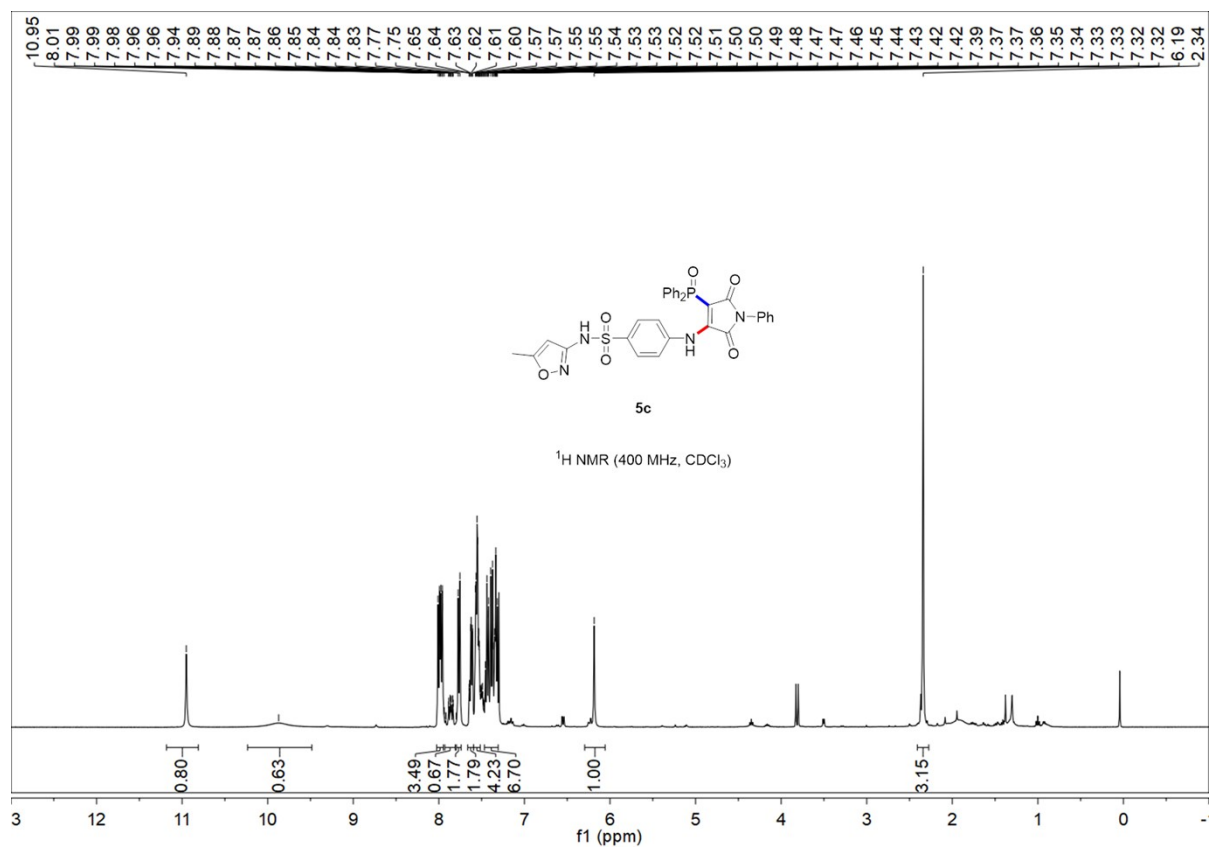

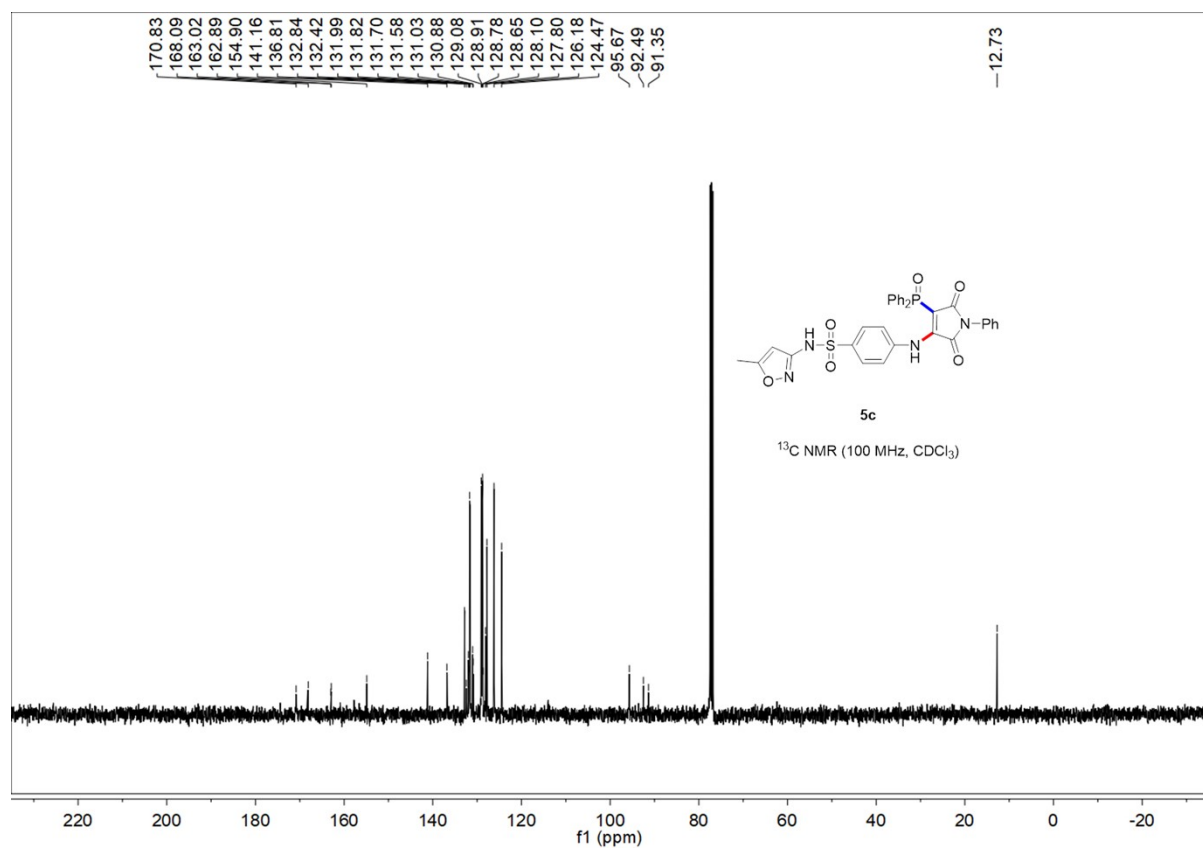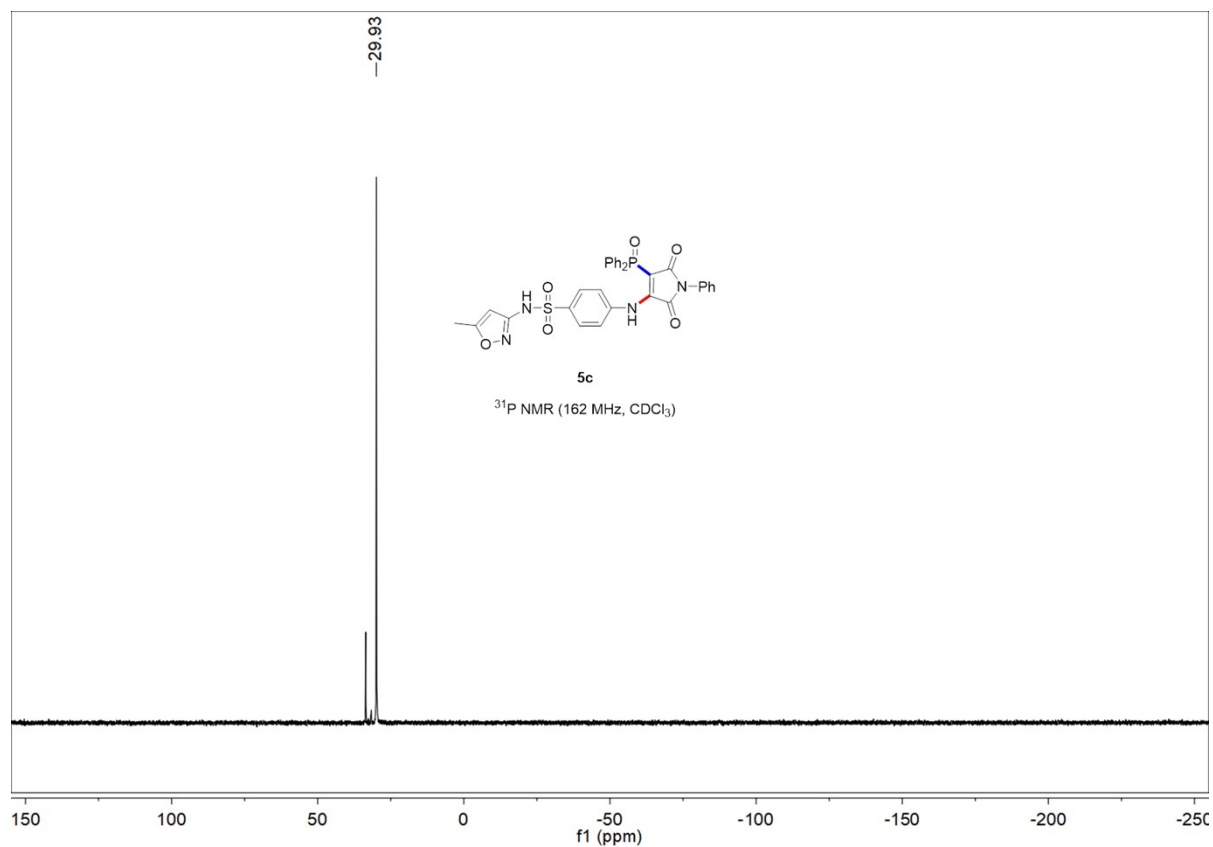

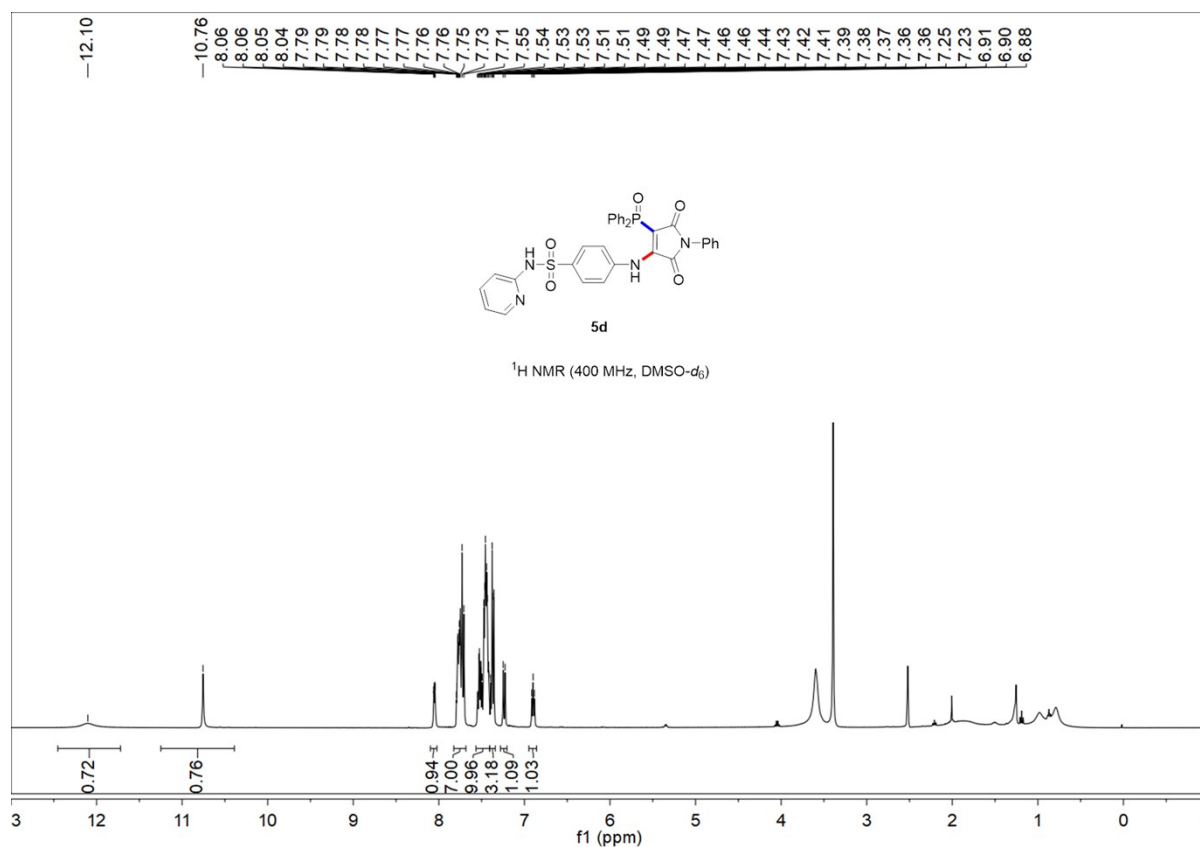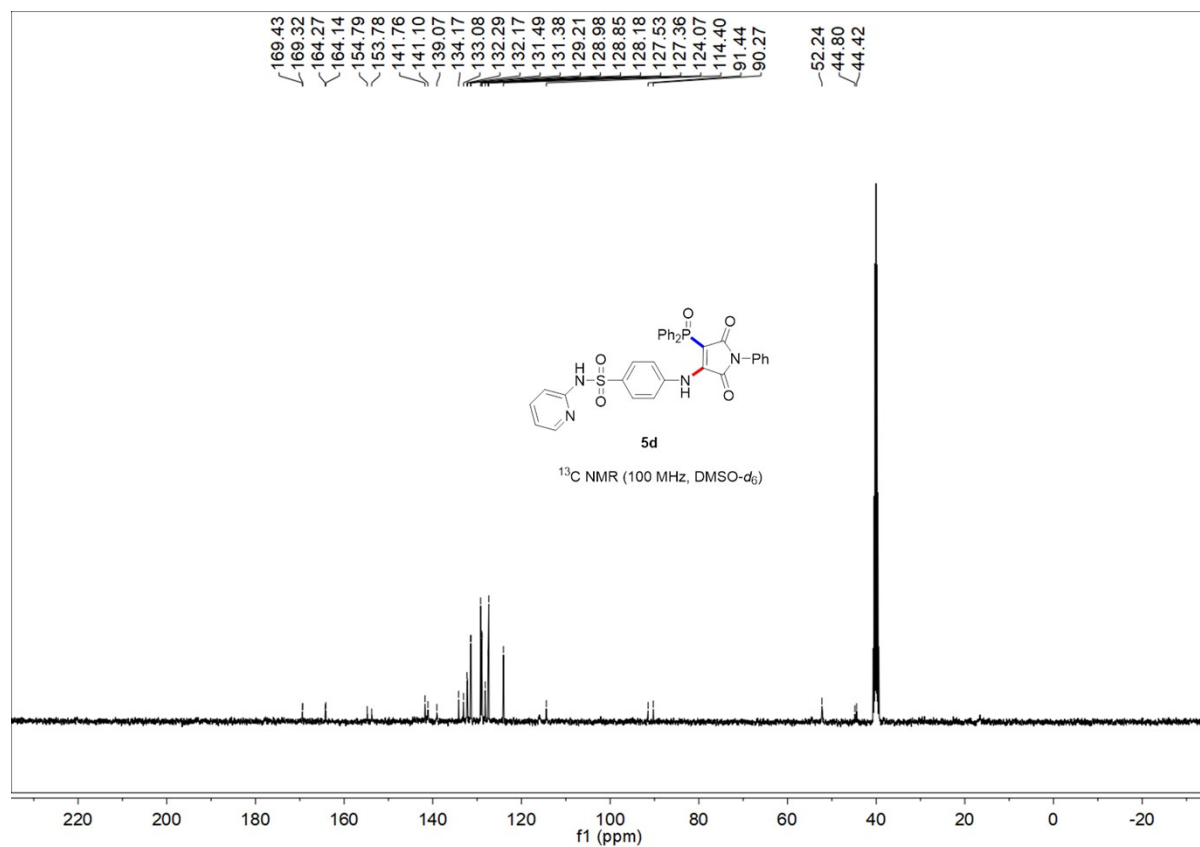

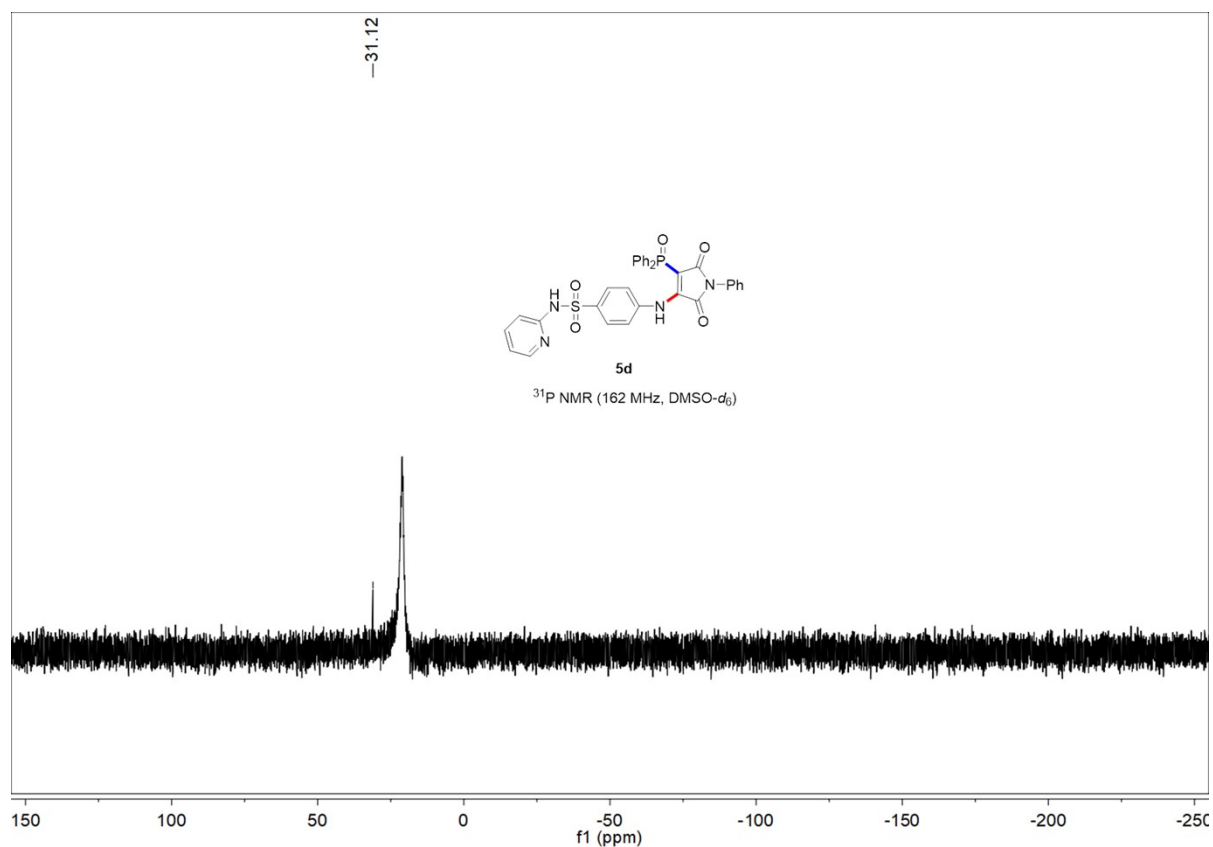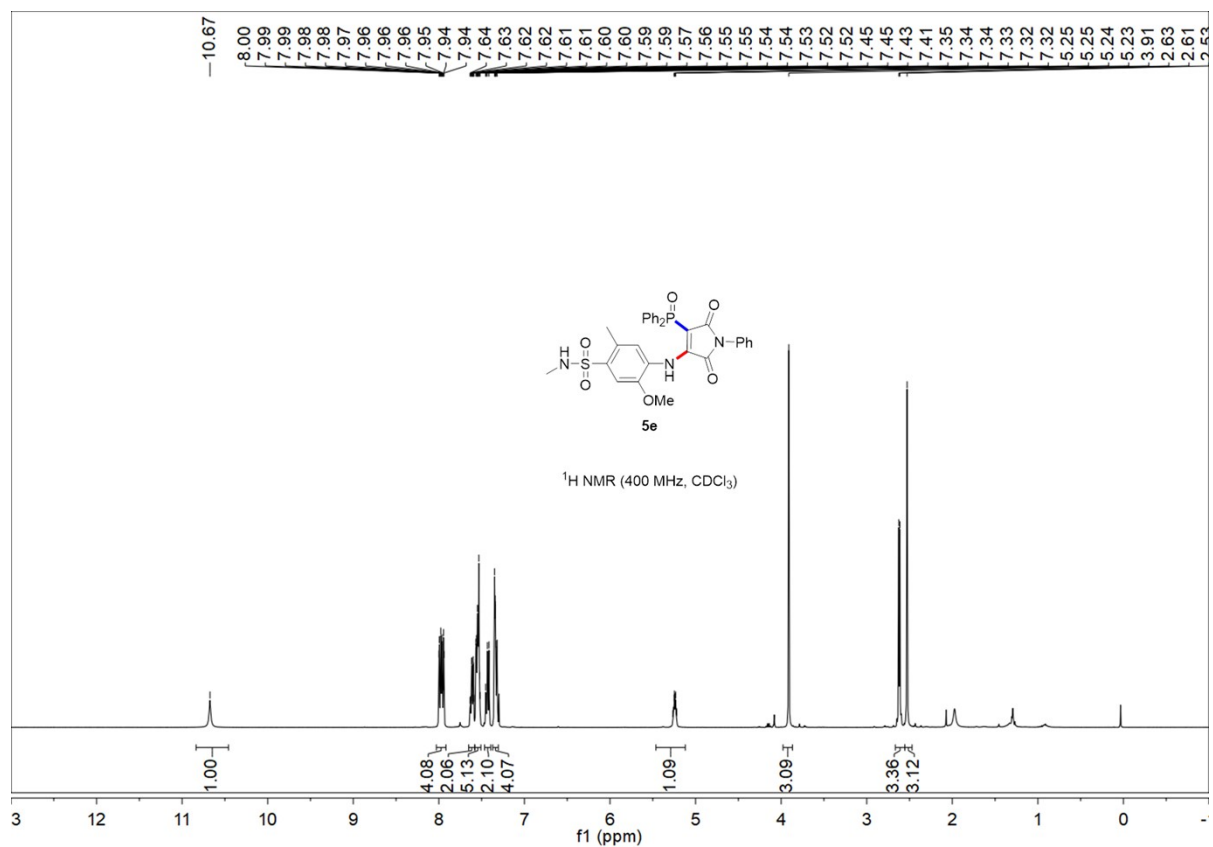



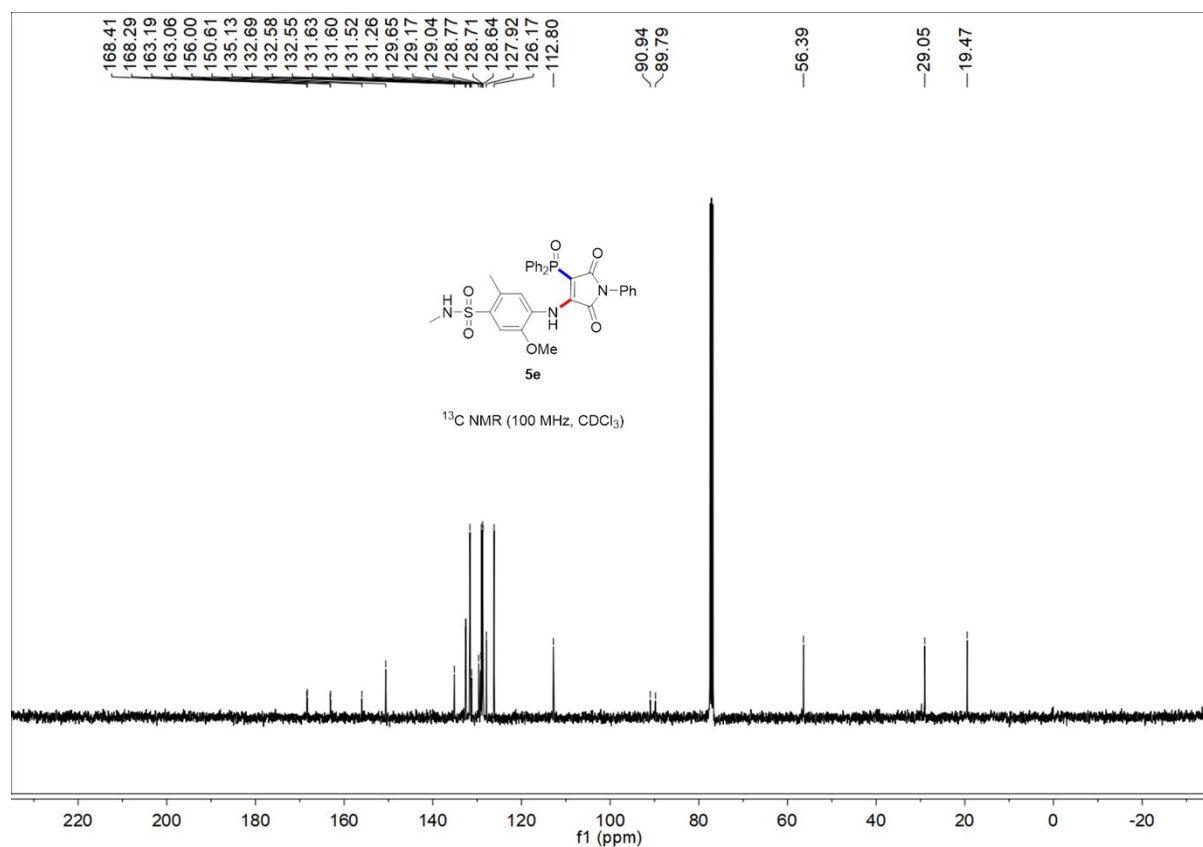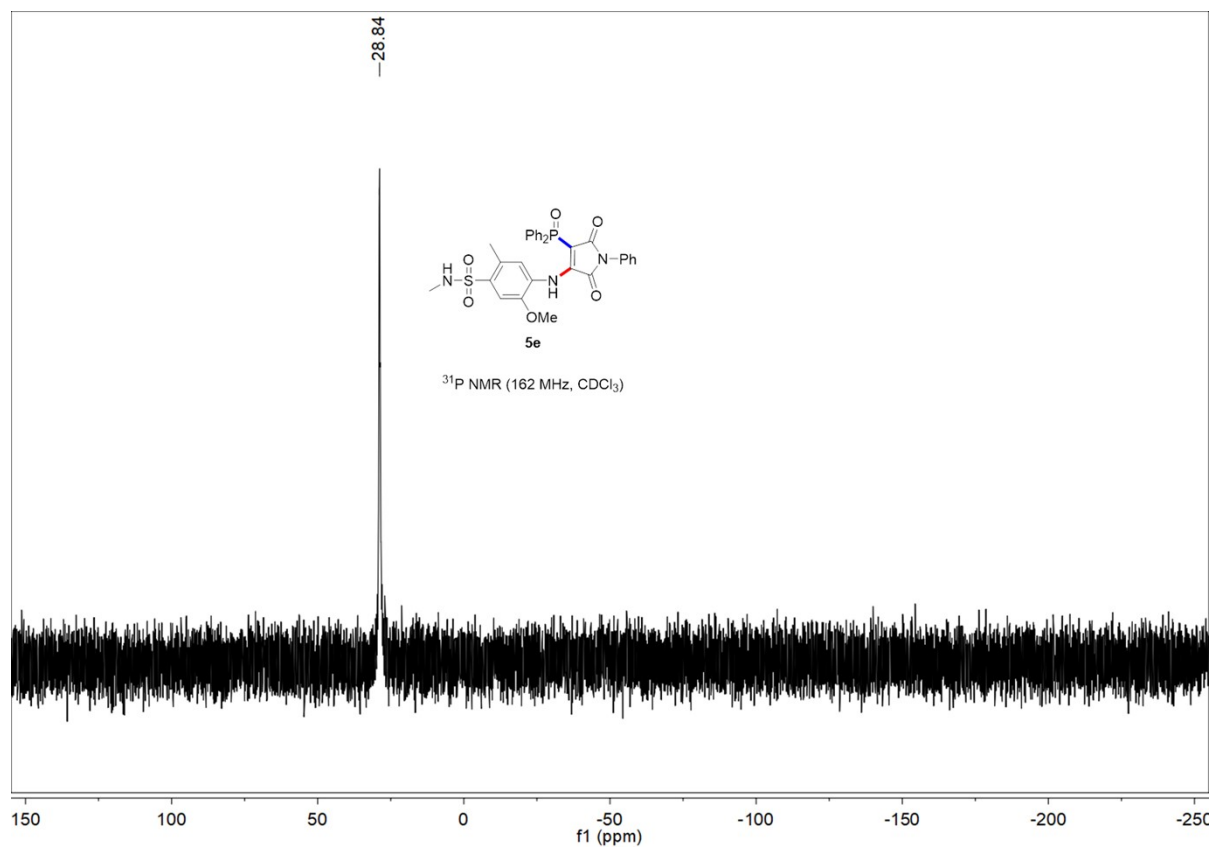

4a+4b

WZMU20211207-1 17 (0.364) AM2 (Ar,20000,0,0,00,0,00); ABS; Cm (17-2)

1: TOF MS ES+  
1.01e6

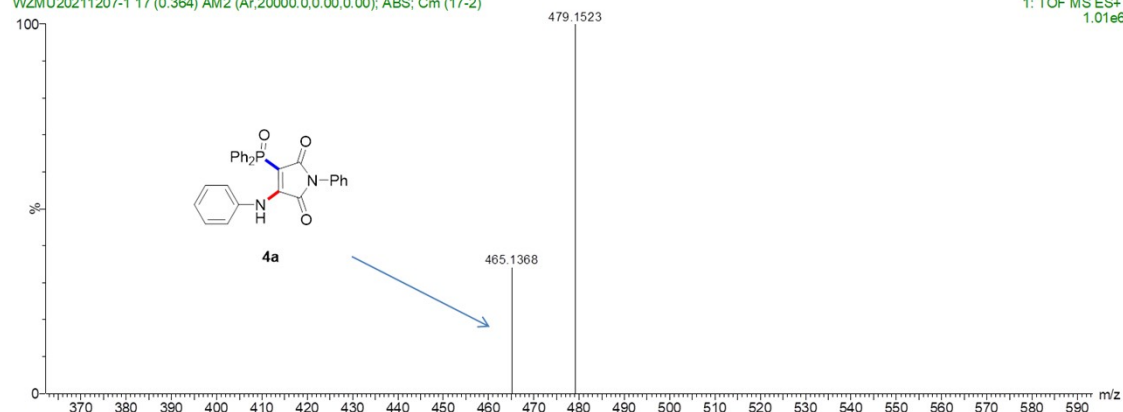

4a+4b

WZMU20211207-1 17 (0.364) AM2 (Ar,20000,0,0,00,0,00); ABS; Cm (17-2)

1: TOF MS ES+  
1.01e6

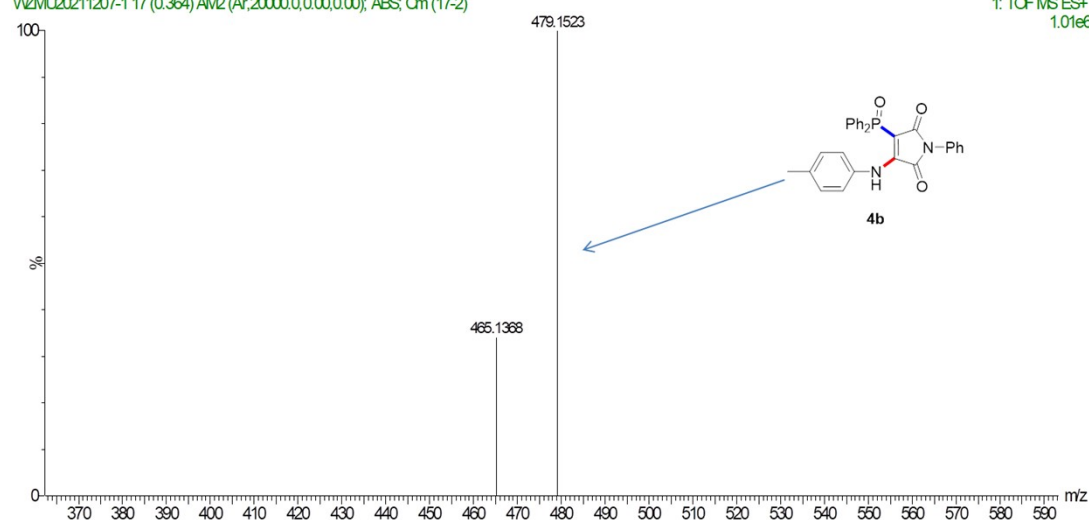

4c+4d

WZMU20211207-2 9 (0.209) AM2 (Ar,20000,0,0,00,0,00); ABS; Cm (9-2)

1: TOF MS ES+  
3.10e7

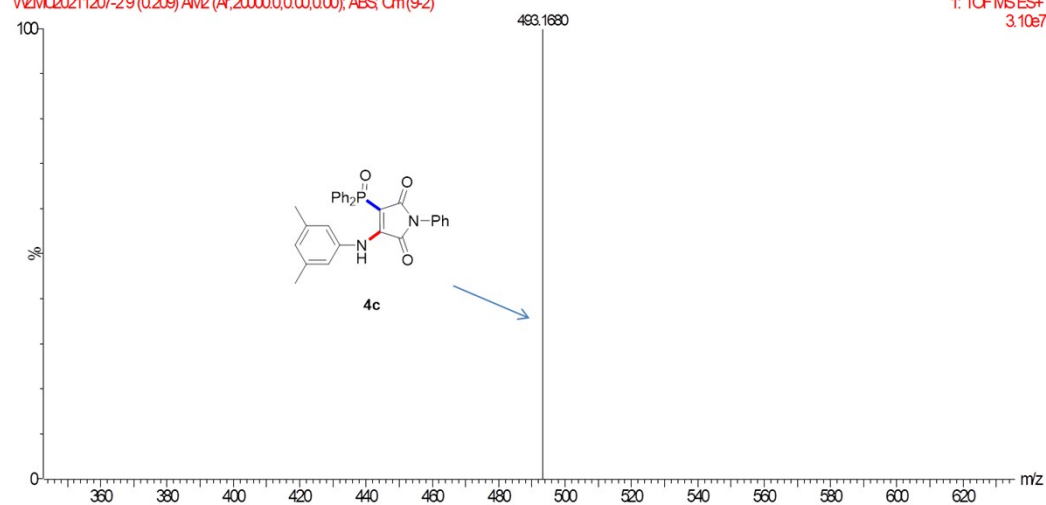

4c+4d

WZMU20211207-2 7 (0.155) AM2 (Ar,20000.0,0.00,0.00); ABS; Cm (7-2)

1: TOF MS ES+  
5.49e6

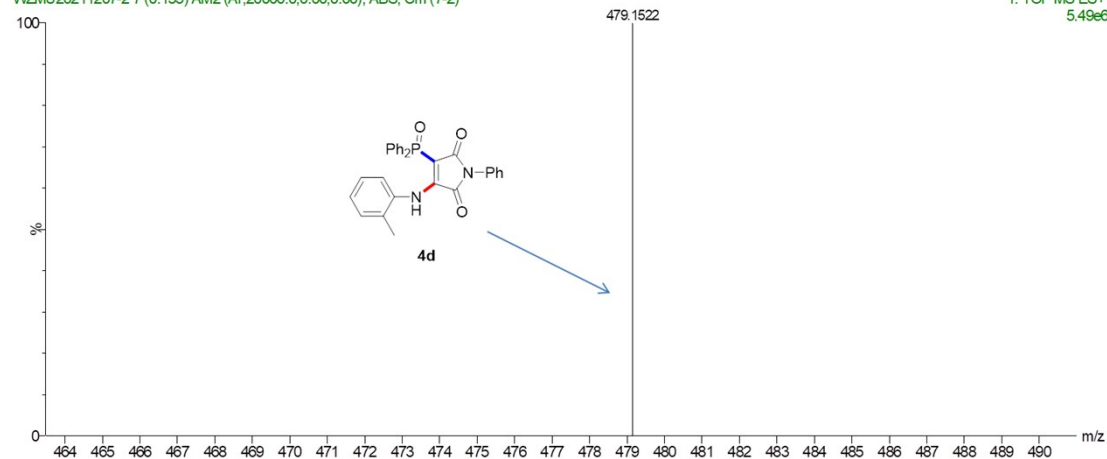

4e+4f

WZMU20211207-3 40 (0.792) AM2 (Ar,20000.0,0.00,0.00); ABS; Cm (40-2)

1: TOF MS ES+  
7.60e4

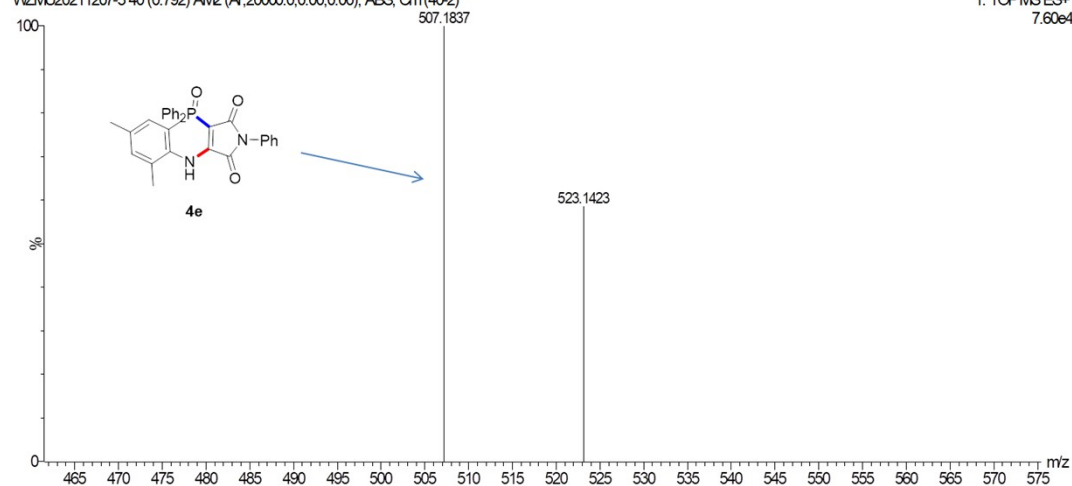

4e+4f

WZMU20211207-3 40 (0.792) AM2 (Ar,20000.0,0.00,0.00); ABS; Cm (40-2)

1: TOF MS ES+  
7.60e4

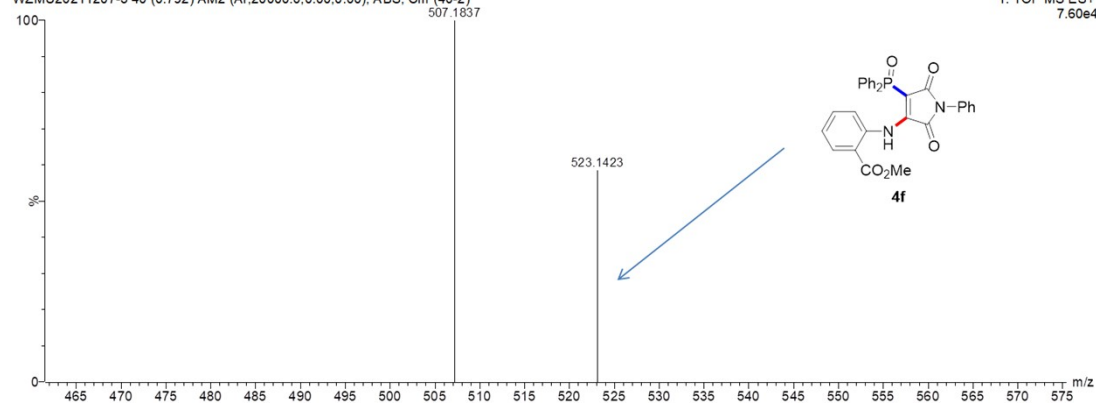

4g+4h

WZMUJ20211207-4 20 (0.414) AM2 (Ar,20000.0,0.00,0.00); ABS; Cm (20-2)

1: TOF MS ES+  
1.24e6

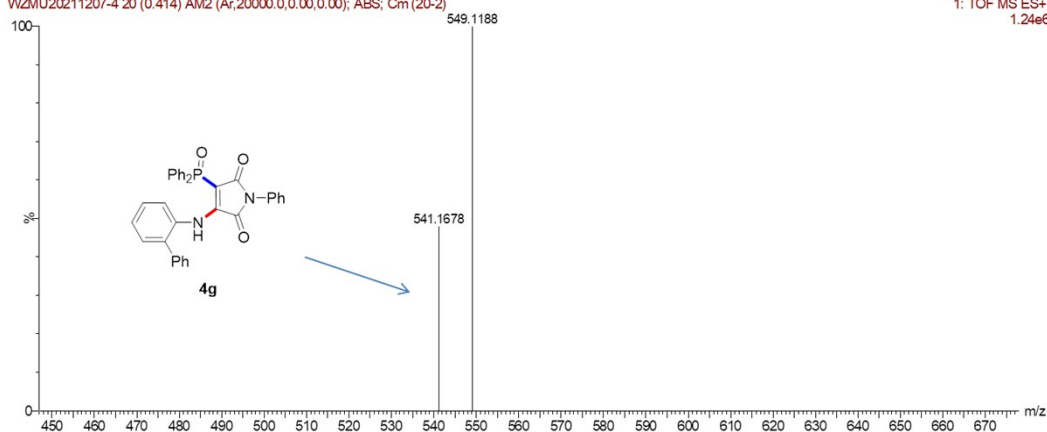

4g+4h

WZMUJ20211207-4 20 (0.414) AM2 (Ar,20000.0,0.00,0.00); ABS; Cm (20-2)

1: TOF MS ES+  
1.24e6

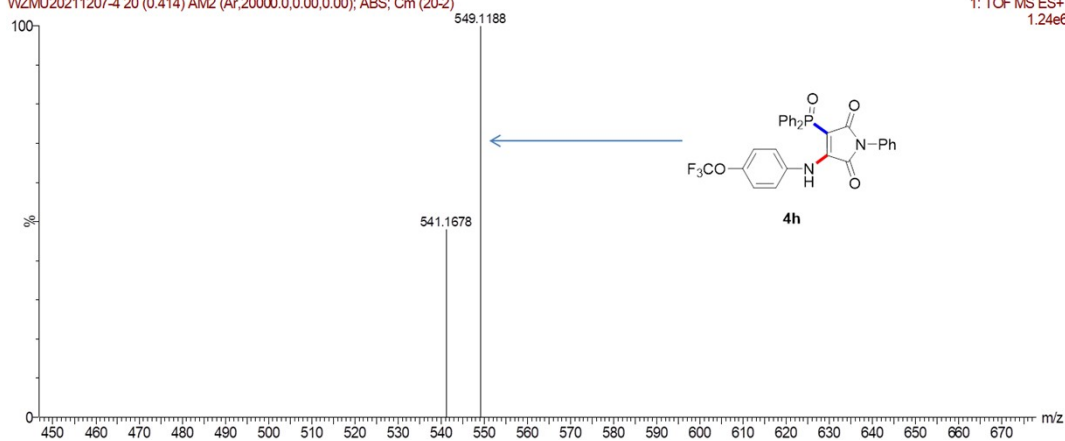

4i+4j

WZMUJ20211207-5 15 (0.310) AM2 (Ar,20000.0,0.00,0.00); ABS; Cm (15-2)

1: TOF MS ES+  
1.01e6

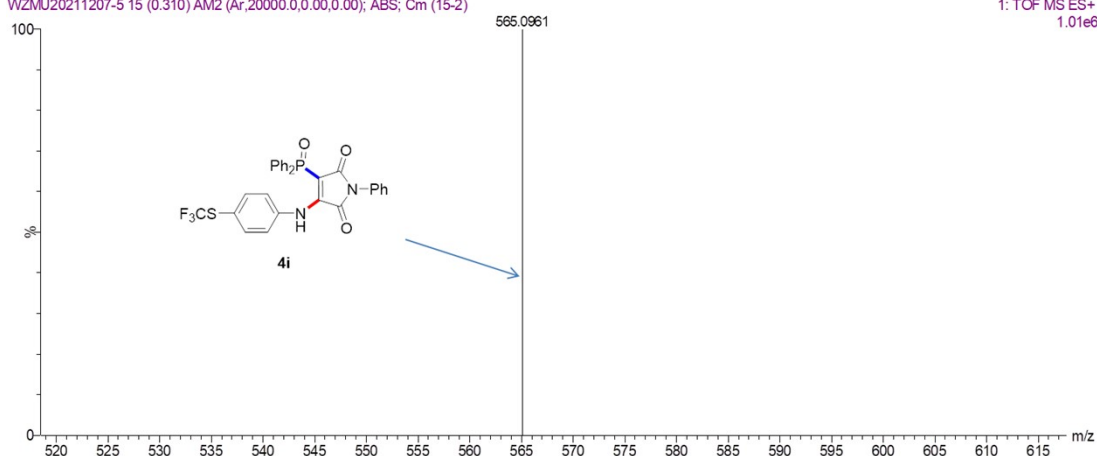

4i+4j

WZMU20211207-5 12 (0.259) AM2 (Ar,20000.0,0.00,0.00); ABS; Cm (12-2)

1: TOF MS ES+  
2.00e7

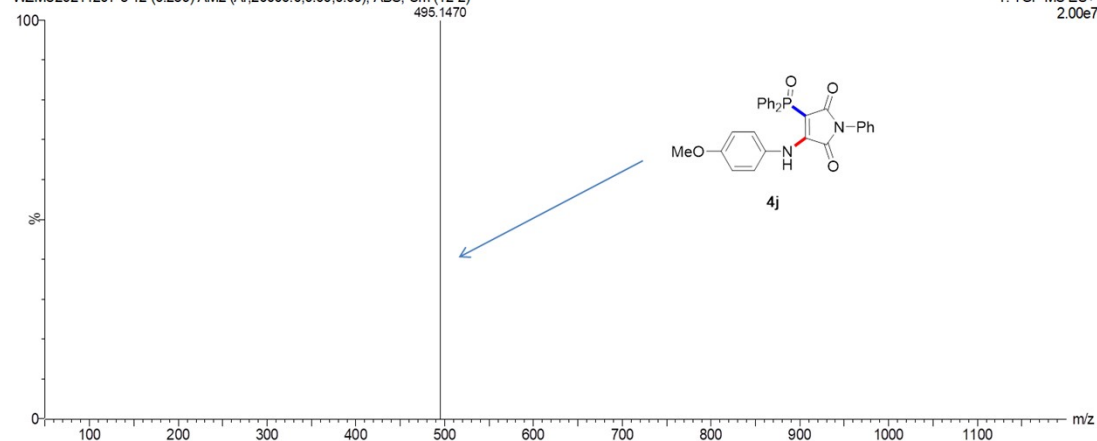

4k+4l

WZMU20211207-6 20 (0.414) AM2 (Ar,20000.0,0.00,0.00); ABS; Cm (20-2)

1: TOF MS ES+  
5.13e5

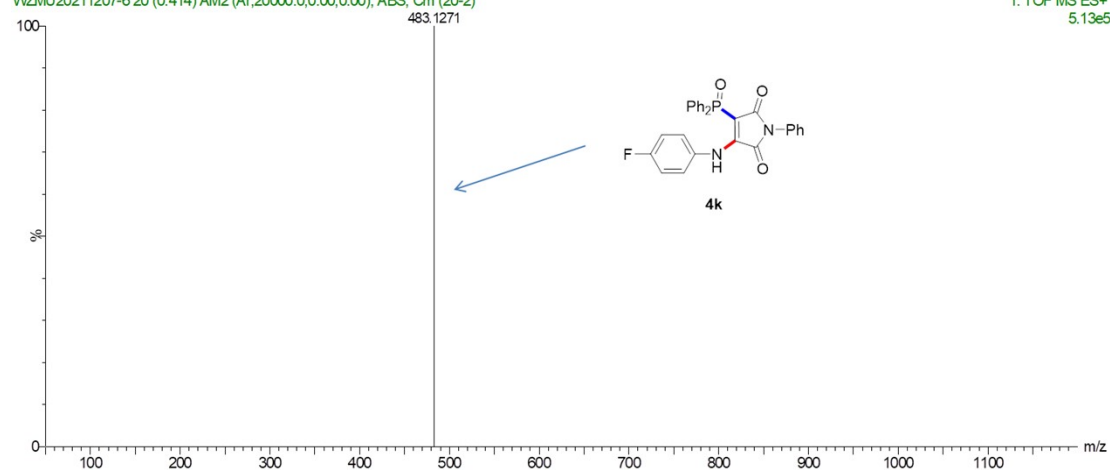

4k+4l

WZMU20211207-6 18 (0.380) AM2 (Ar,20000.0,0.00,0.00); ABS; Cm (18-2)

1: TOF MS ES+  
4.18e5

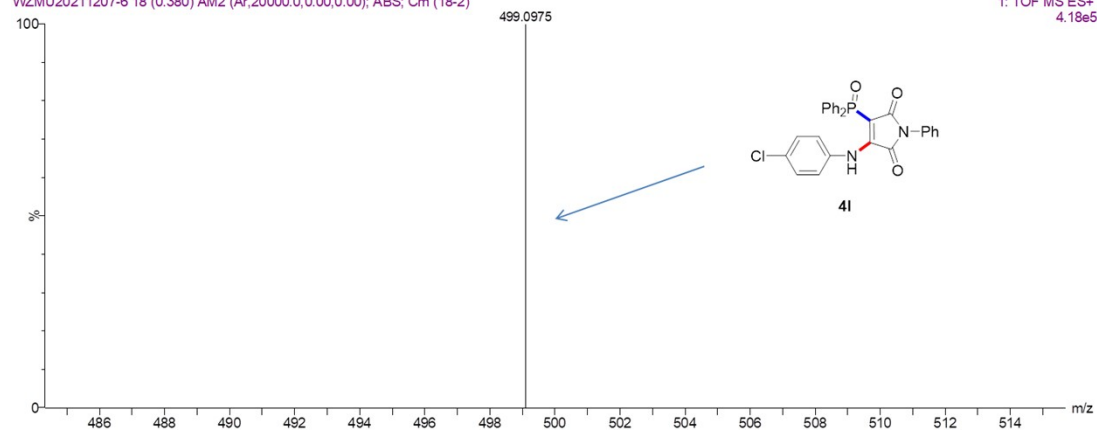

4m+4n

WZMU20211207-7 16 (0.327) AM2 (Ar,20000.0,0.00,0.00); ABS; Cm (16-2)

1: TOF MS ES+  
1.06e6

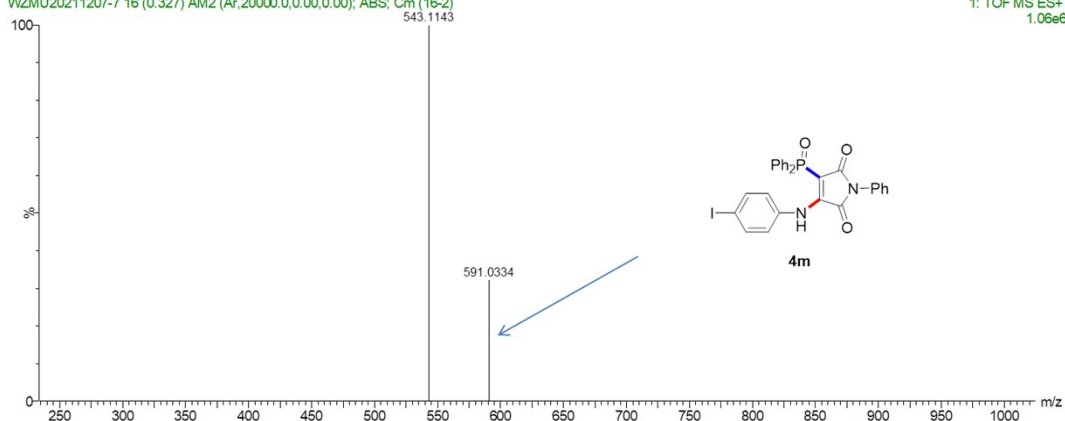

4m+4n

WZMU20211207-7 16 (0.327) AM2 (Ar,20000.0,0.00,0.00); ABS; Cm (16-2)

1: TOF MS ES+  
1.06e6

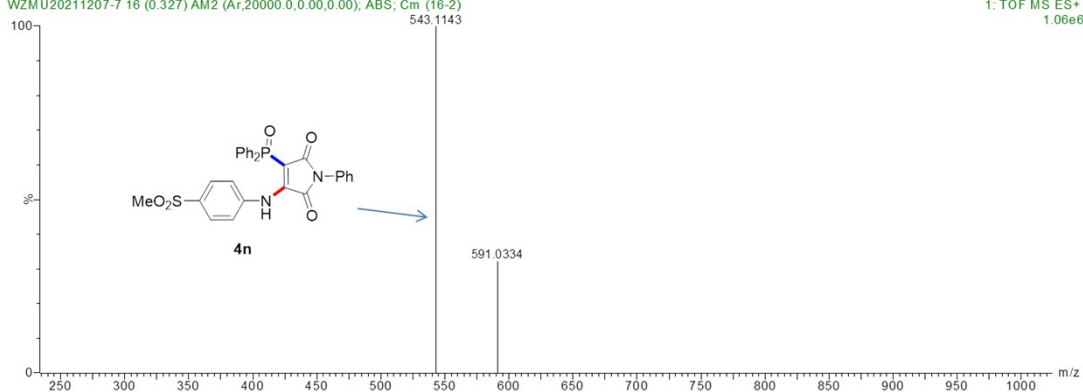

4o+4p

WZMU20211207-8 11 (0.242) AM2 (Ar,20000.0,0.00,0.00); ABS; Cm (11-2)

1: TOF MS ES+  
2.03e7

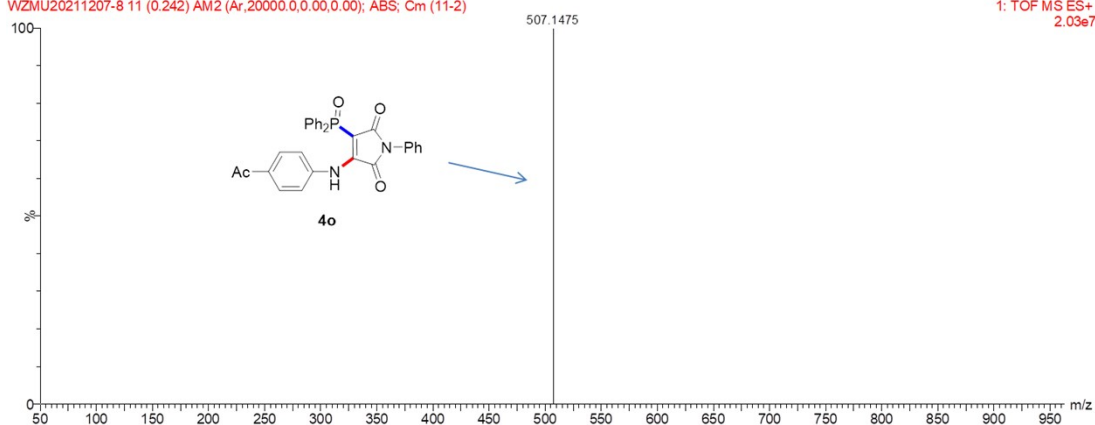

4o+4p

WZMU20211207-8 16 (0.327) AM2 (Ar,20000.0,0.00,0.00); ABS; Cm (16-2)

1: TOF MS ES+  
8.44e5

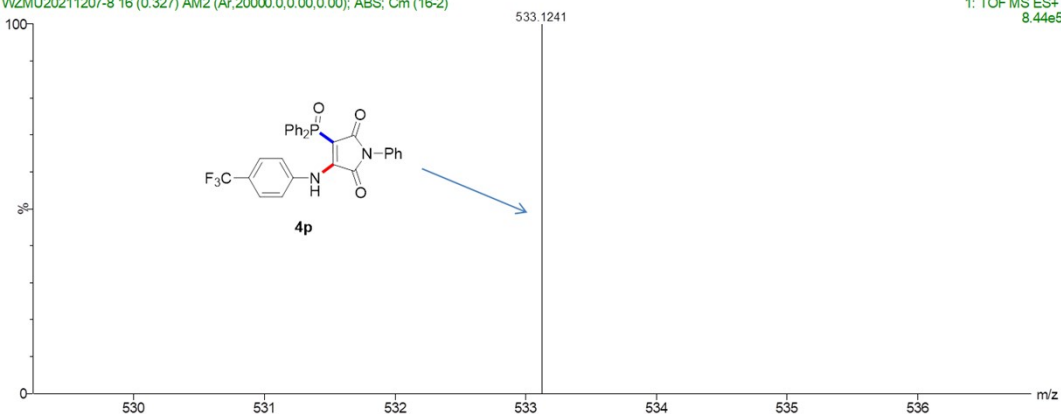

4q+4r

WZMU20211207-9 16 (0.327) AM2 (Ar,20000.0,0.00,0.00); ABS; Cm (16-2)

1: TOF MS ES+  
2.10e7

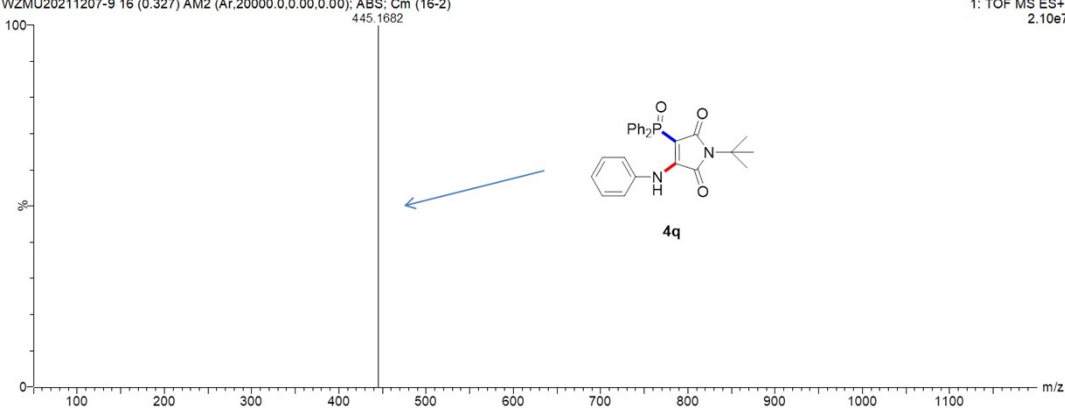

4q+4r

WZMU20211207-9 15 (0.310) AM2 (Ar,20000.0,0.00,0.00); ABS; Cm (15-2)

1: TOF MS ES+  
1.31e6

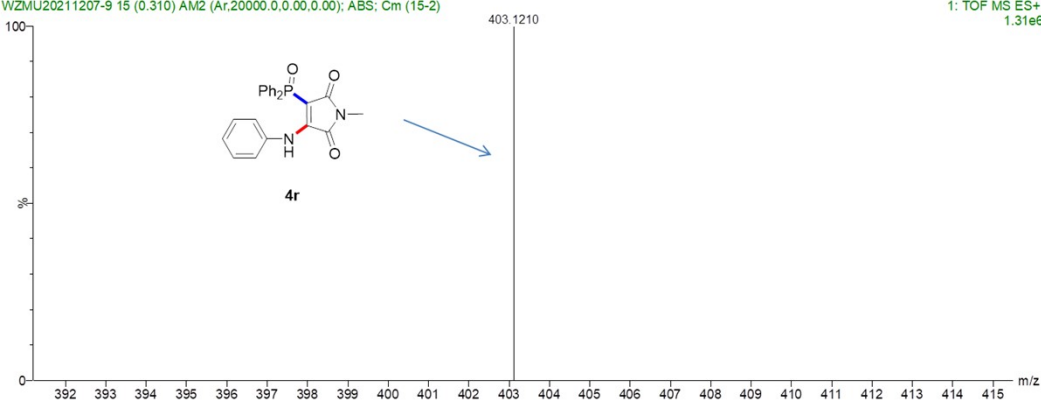

4s+4t

VZMU20211207-10 19 (0.397) AM2 (Ar,20000.0,0.00,0.00); ABS; Cm (19-2)

1: TOF MS ES+  
2.37e6

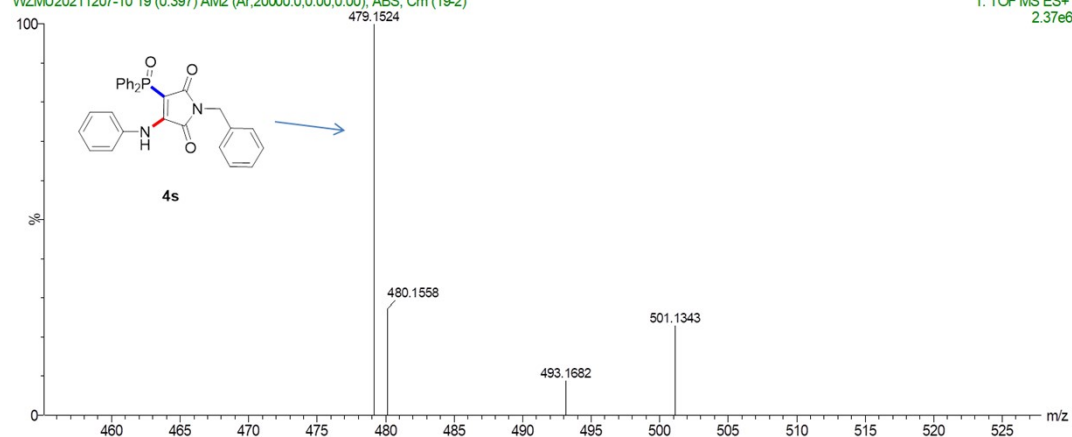

4s+4t

VZMU20211207-10 19 (0.397) AM2 (Ar,20000.0,0.00,0.00); ABS; Cm (19-2)

1: TOF MS ES+  
2.37e6

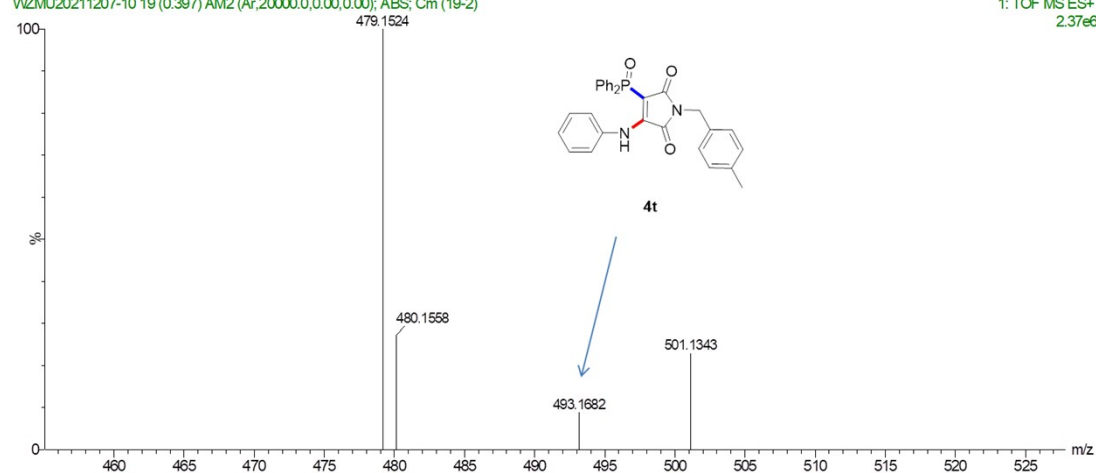

4u+4v

VZMU20211207-11 28 (0.569) AM2 (Ar,20000.0,0.00,0.00); ABS; Cm (28-2)

1: TOF MS ES+  
4.38e4

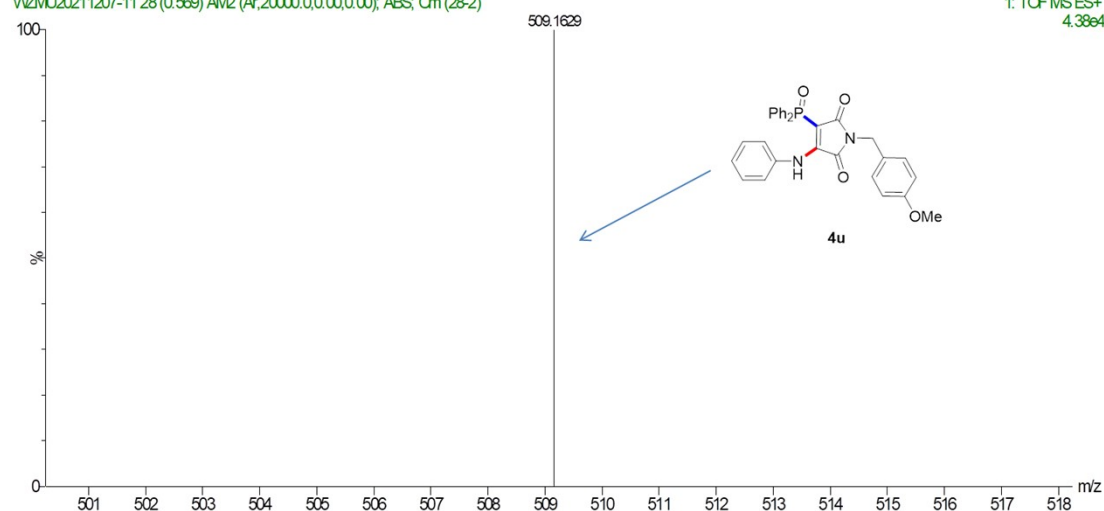



WZMU20211207-11 15 (0.310) AM2 (Ar,20000.0,0.00,0.00); ABS; Cm (15-2)

**4v**

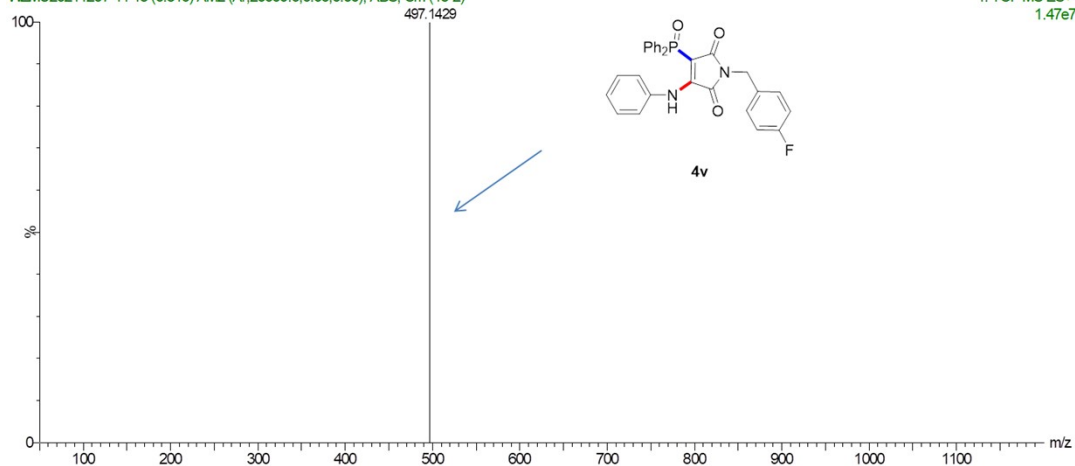

WZMLU20211207-12 30 (0.603) AM2 (Ar,20000.0,0.00,0.00); ABS; Cm (30-2)

O=C1C(=O)N(Cc2ccc(Cl)cc2)C(=O)N1C(=O)P(=O)(c3ccccc3)c4ccccc4

**4w**

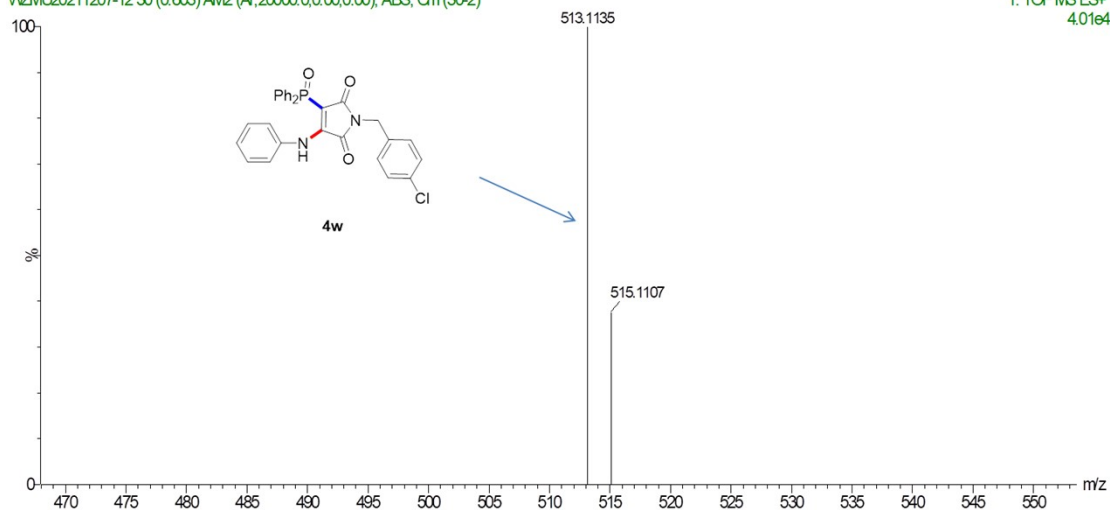

WZMU20211207-12 12 (0.259) AM2 (Ar,20000.0,0.00,0.00); ABS; Cm (12-2)

**4x**

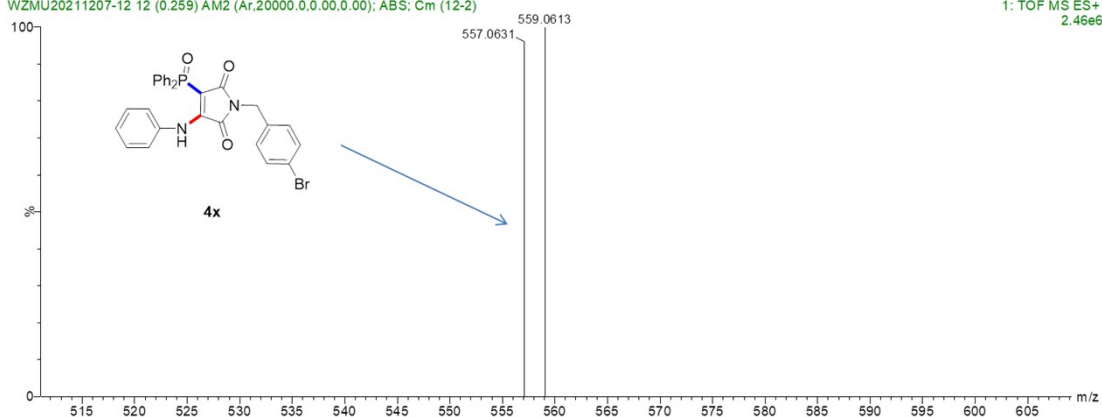

4y+4z

WZMJU20211207-13 45 (0.896) AM2 (Ar,20000.0,0.00,0.00); ABS; Cm(45-2)

1: TOF MS ES+  
9.71e4

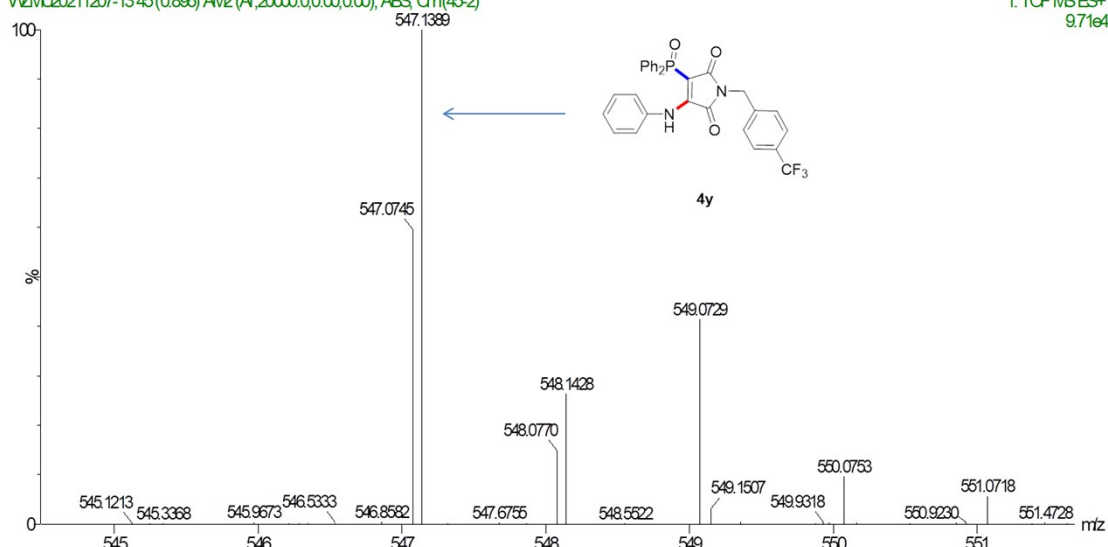

4y+4z

WZMJU20211207-13 45 (0.896) AM2 (Ar,20000.0,0.00,0.00); ABS; Cm(45-2)

1: TOF MS ES+  
9.71e4

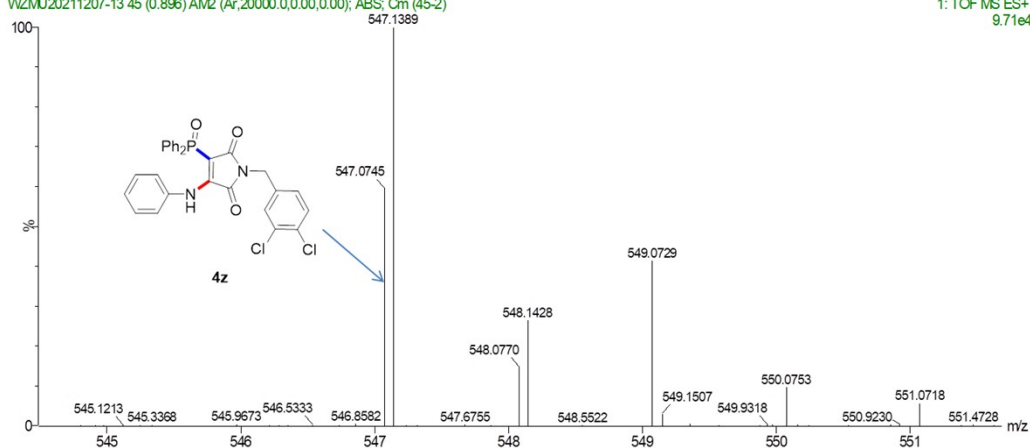

4ab+4ac

WZMJU20211207-14 20 (0.414) AM2 (Ar,20000.0,0.00,0.00); ABS; Cm(20-2)

1: TOF MS ES+  
2.91e6

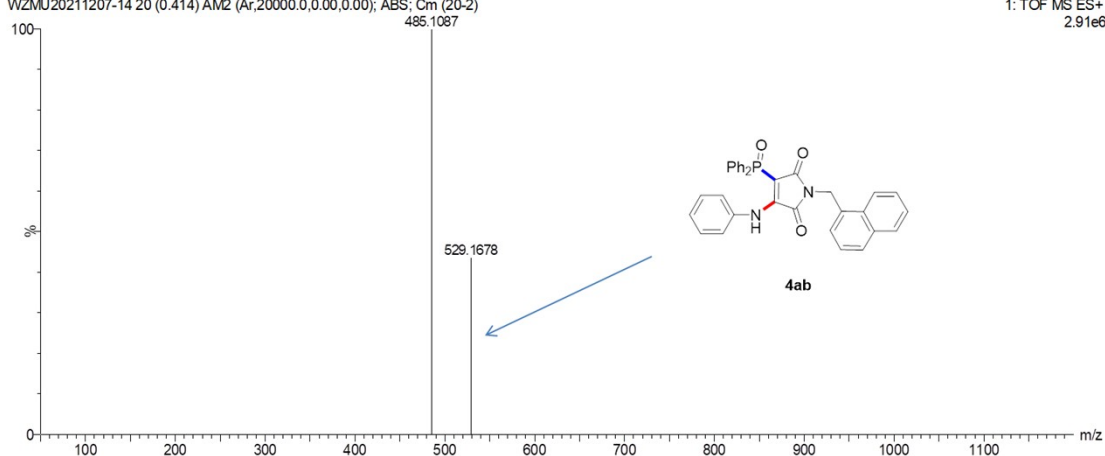

4ab+4ac

VZIMU20211207-14.20 (0.414) AM2 (Ar,20000.0,0.00,0.00); ABS; Cm (20-2)

1: TOF MS ES+  
2.91e6

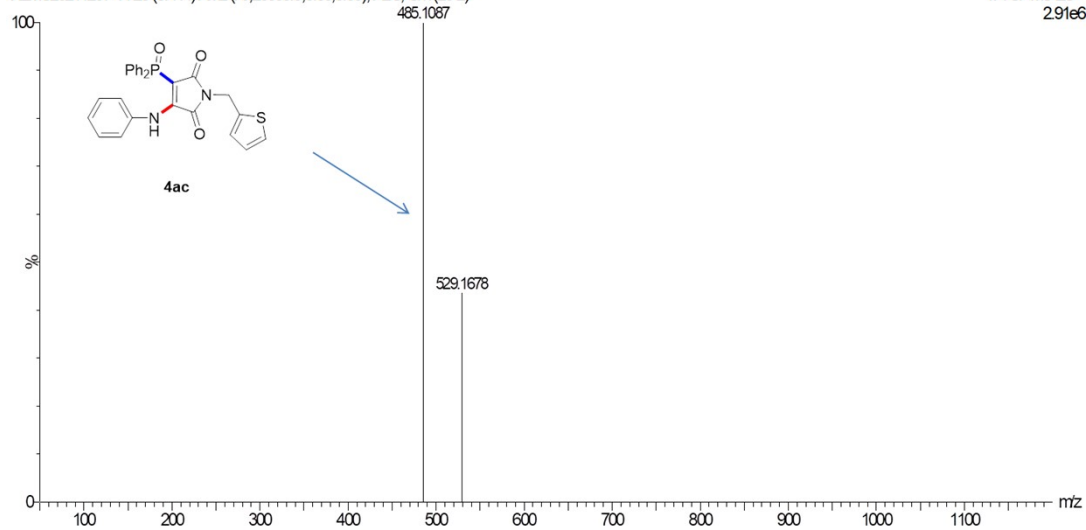

4ad+4ae

VZIMU20211207-15.10 (0.225) AM2 (Ar,20000.0,0.00,0.00); ABS; Cm (10-2)

1: TOF MS ES+  
2.48e7

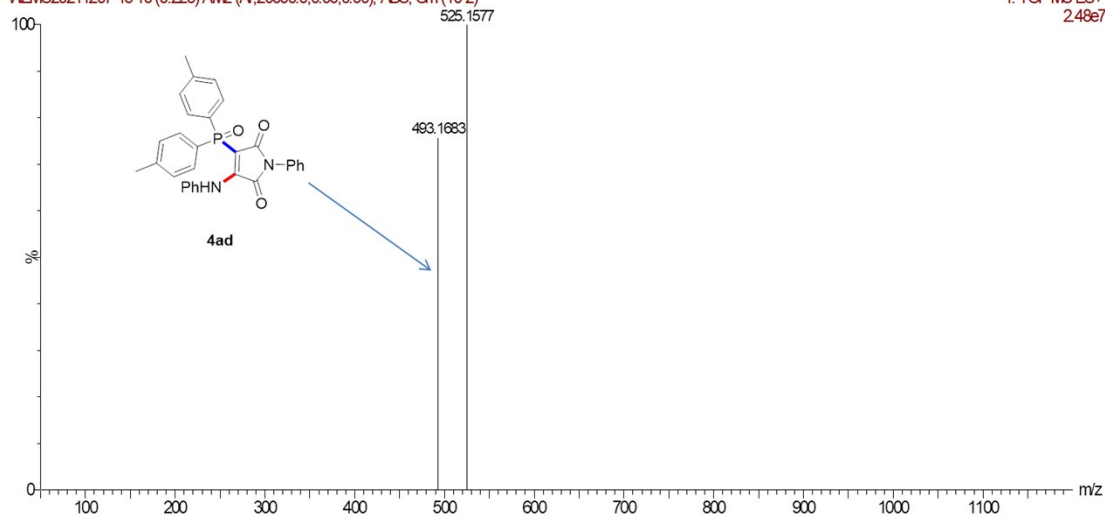

4ad+4ae

VZIMU20211207-15.10 (0.225) AM2 (Ar,20000.0,0.00,0.00); ABS; Cm (10-2)

1: TOF MS ES+  
2.48e7

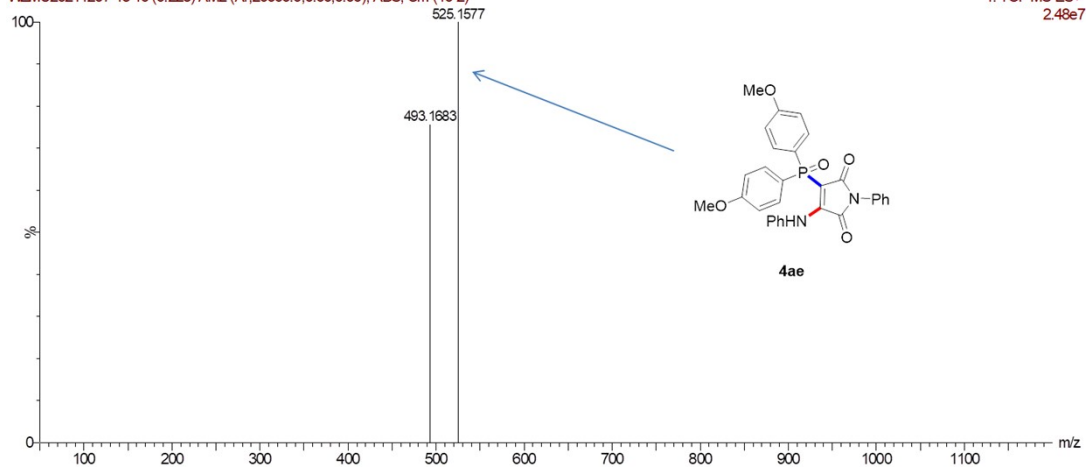

4af+4ag

VZMLU20211207-16 11 (0.242) AM2 (Ar,20000.0,0.00,0.00); ABS; Cm (11-2)

1: TOF MS ES+  
2.47e7

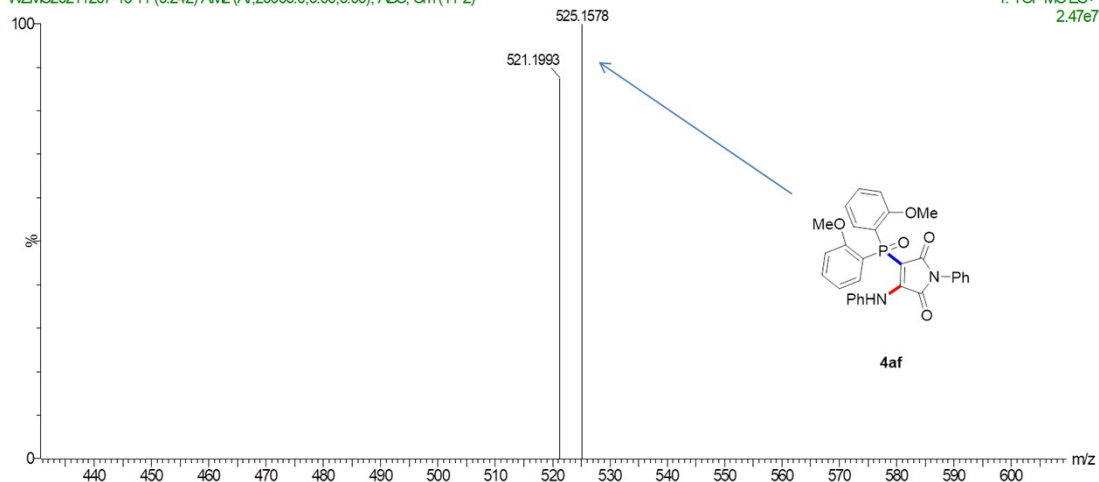

4af+4ag

VZMLU20211207-16 11 (0.242) AM2 (Ar,20000.0,0.00,0.00); ABS; Cm (11-2)

1: TOF MS ES+  
2.47e7

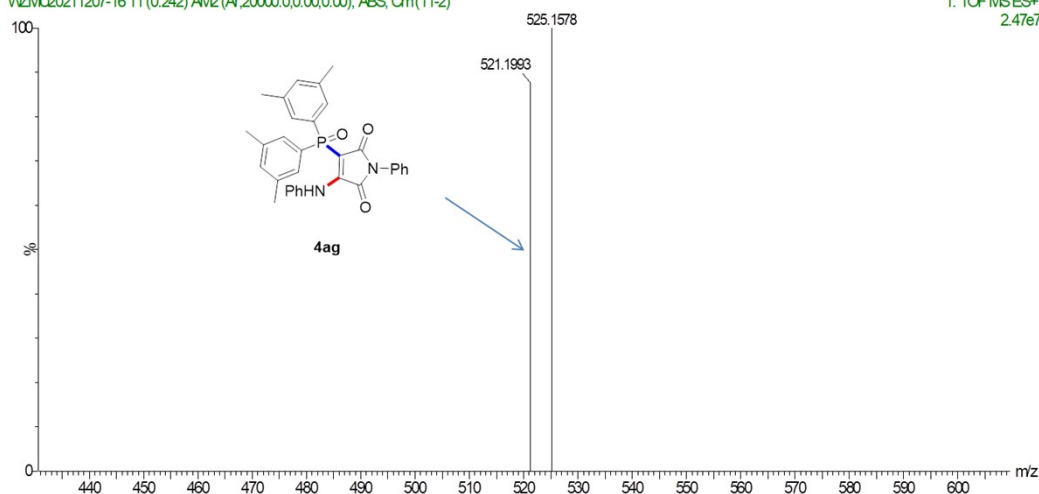

4ah+4ai

VZMLU20211207-17 8 (0.172) AM2 (Ar,20000.0,0.00,0.00); ABS; Cm (8-2)

1: TOF MS ES+  
3.36e6

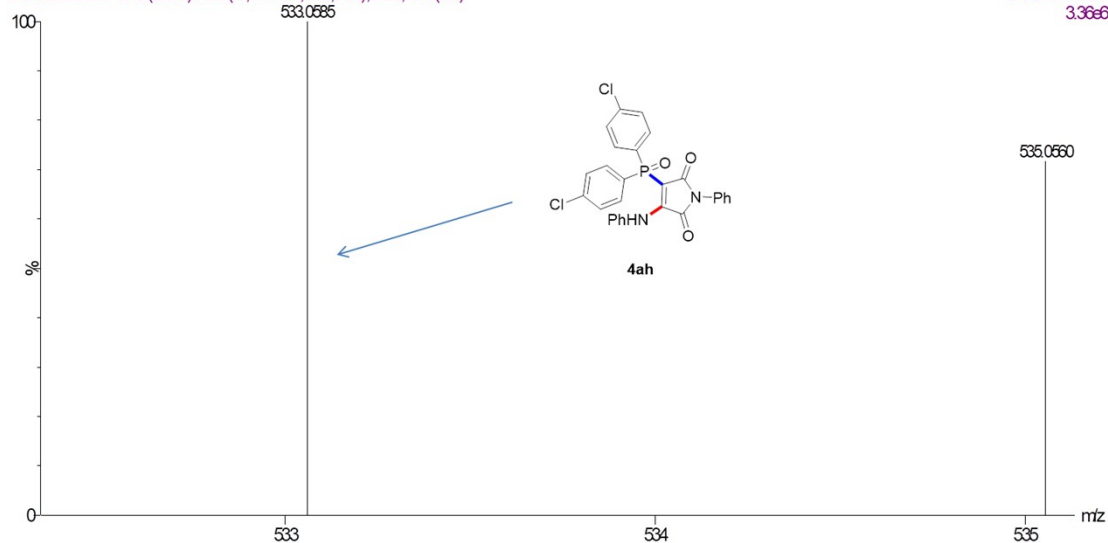

4eh+4ai

VZVMU20211207-17 12 (0.259) AM2 (Ar,20000.0,0.00,0.00); ABS; Cm(12-2)

1: TOF MS ES+  
2.25e7

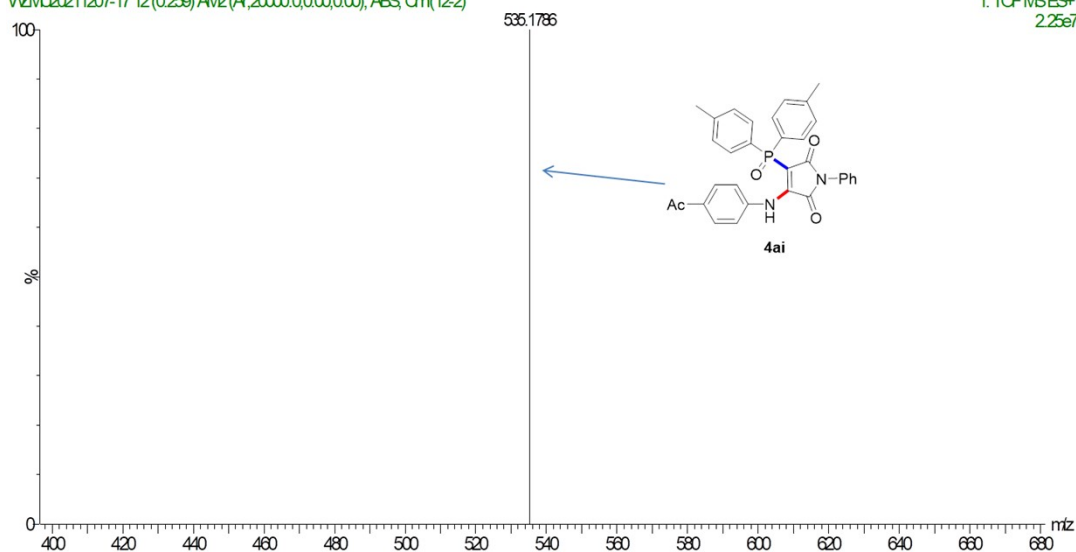

wg913

VZMU-wg20220310 112 (1.057) AM2 (Ar,20000.0,0.00,0.00); Cm (112-2x2.000)

1: TOF MS ES+  
7.25e6

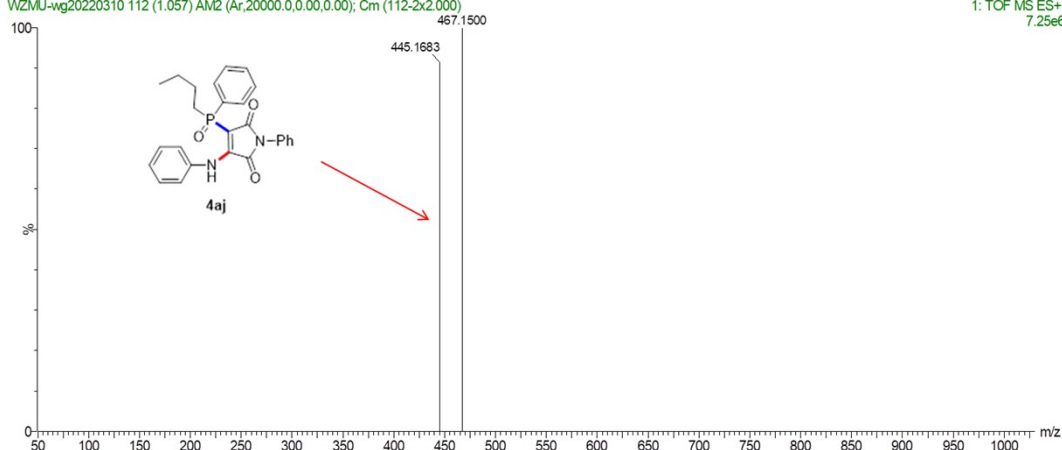

5a+5b

VZMU20211207-18 25 (0.519) AM2 (Ar,20000.0,0.00,0.00); ABS; Cm(25-2)

1: TOF MS ES+  
8.15e4

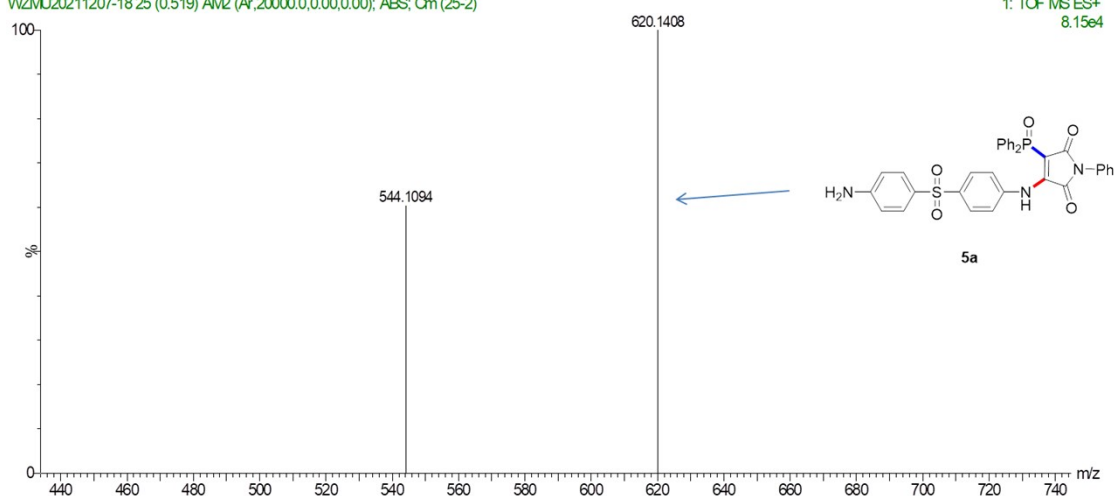

5a+5b

VZML20211207-18 25 (0.519) AM2 (Ar,20000,0,0,0,0,0); ABS; Cm (25-2)

1: TOF MS ES+  
8.15e4

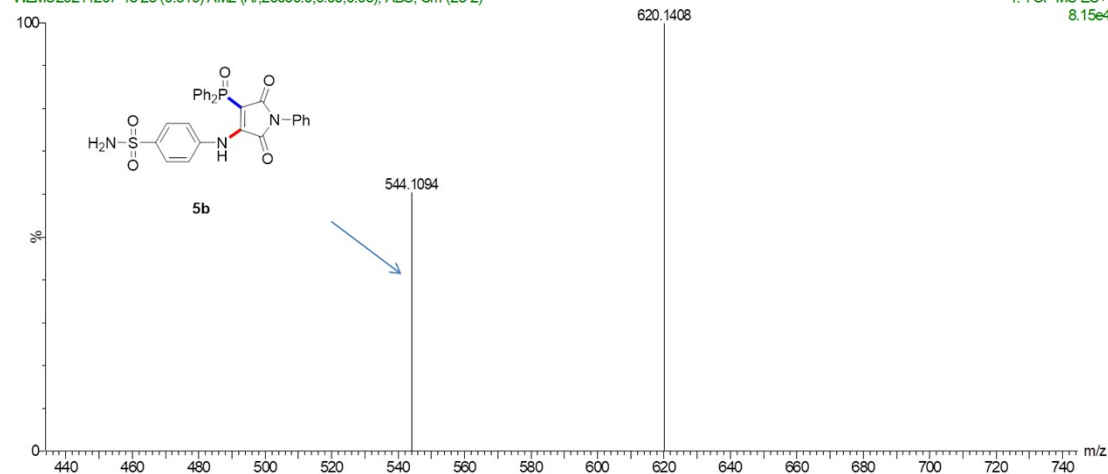

5c+5d

VZML20211207-19 11 (0.242) AM2 (Ar,20000,0,0,0,0,0); ABS; Cm (11-2)

1: TOF MS ES+  
3.10e6

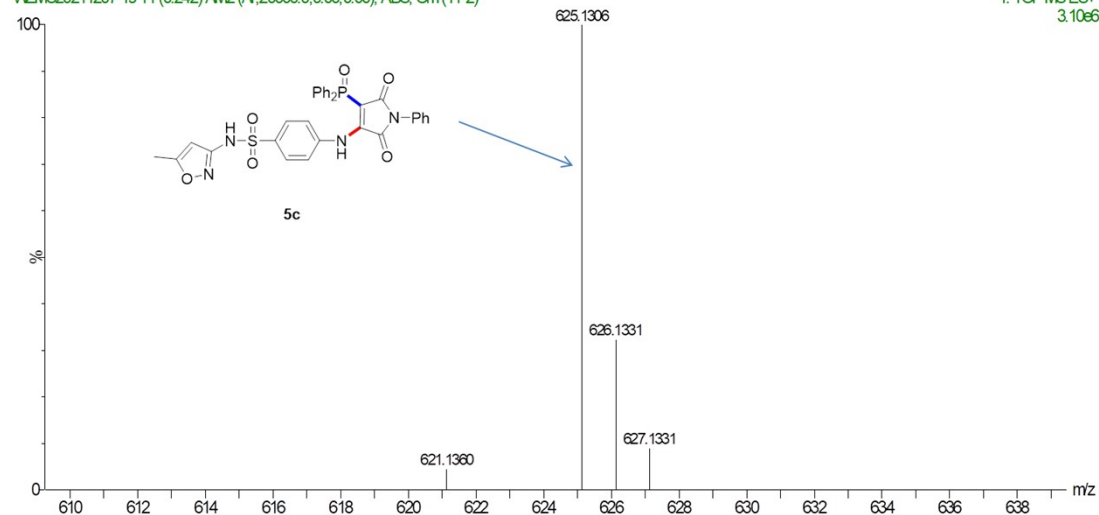

5c+5d

VZML20211207-19 11 (0.242) AM2 (Ar,20000,0,0,0,0,0); ABS; Cm (11-2)

1: TOF MS ES+  
3.10e6

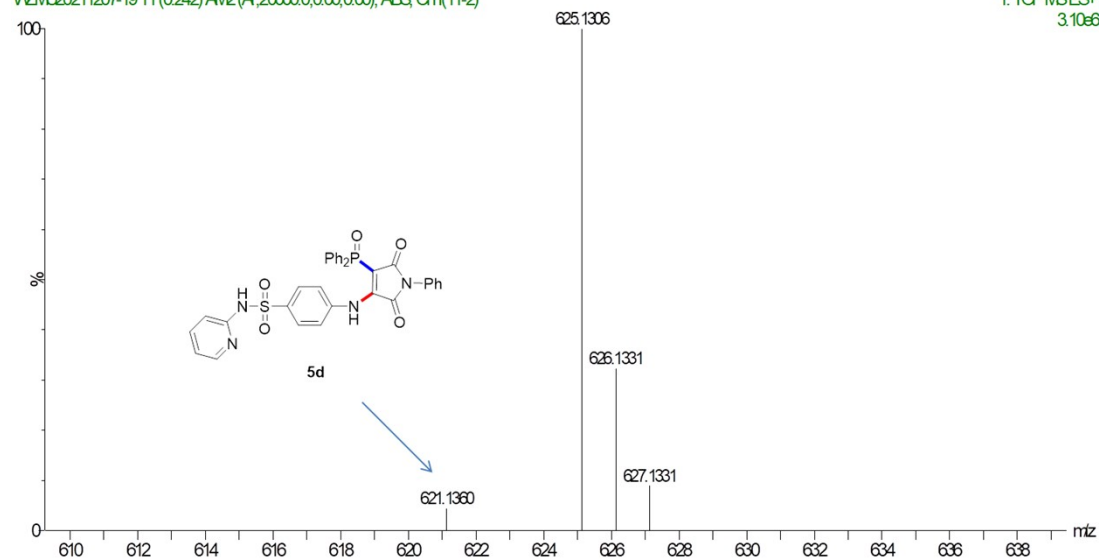

5e+wg818

VZML20211207-20:30 (0.603) AM2 (Ar, 20000.0, 0.00, 0.00); ABS; Cn(30.2)

1: TOF MS ES+  
3.65e4

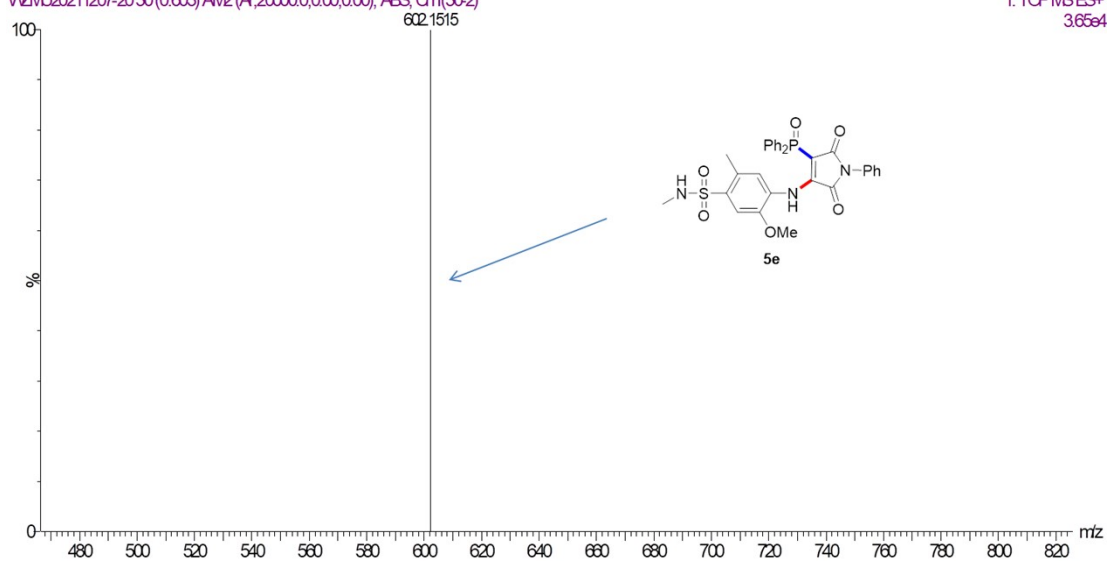

Supplement: d2qo00184e1.pdf [file d2qo00184e1.pdf]
